# Supplementary material
Source: PubMed Central journal article supplement (PMC5606144)
Supplement: NIHMS904623-supplement-SI_PART_B.pdf [file NIHMS904623-supplement-SI_PART_B.pdf]

# **Intramolecular Chirality Transfer [2+2] Cycloadditions of Allenates and Alkenes**

Yao Xu<sup>§</sup>, Young J. Hong<sup>#</sup>, Dean J. Tantillo<sup>#</sup> and M. Kevin Brown<sup>§\*</sup>

*<sup>§</sup>Indiana University Bloomington, Department of Chemistry, 800 E.  
Kirkwood Ave., Bloomington, IN 47405*

*<sup>#</sup>University of California, Davis, Department of Chemistry, 1 Shields  
Ave., Davis, CA 95616*

**SUPPORTING INFORMATION: PART B**

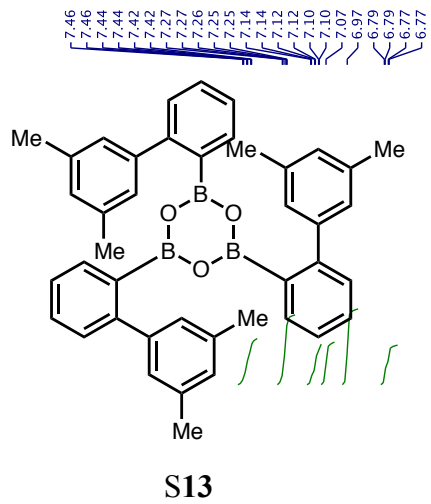

2.37  
2.35  
2.33

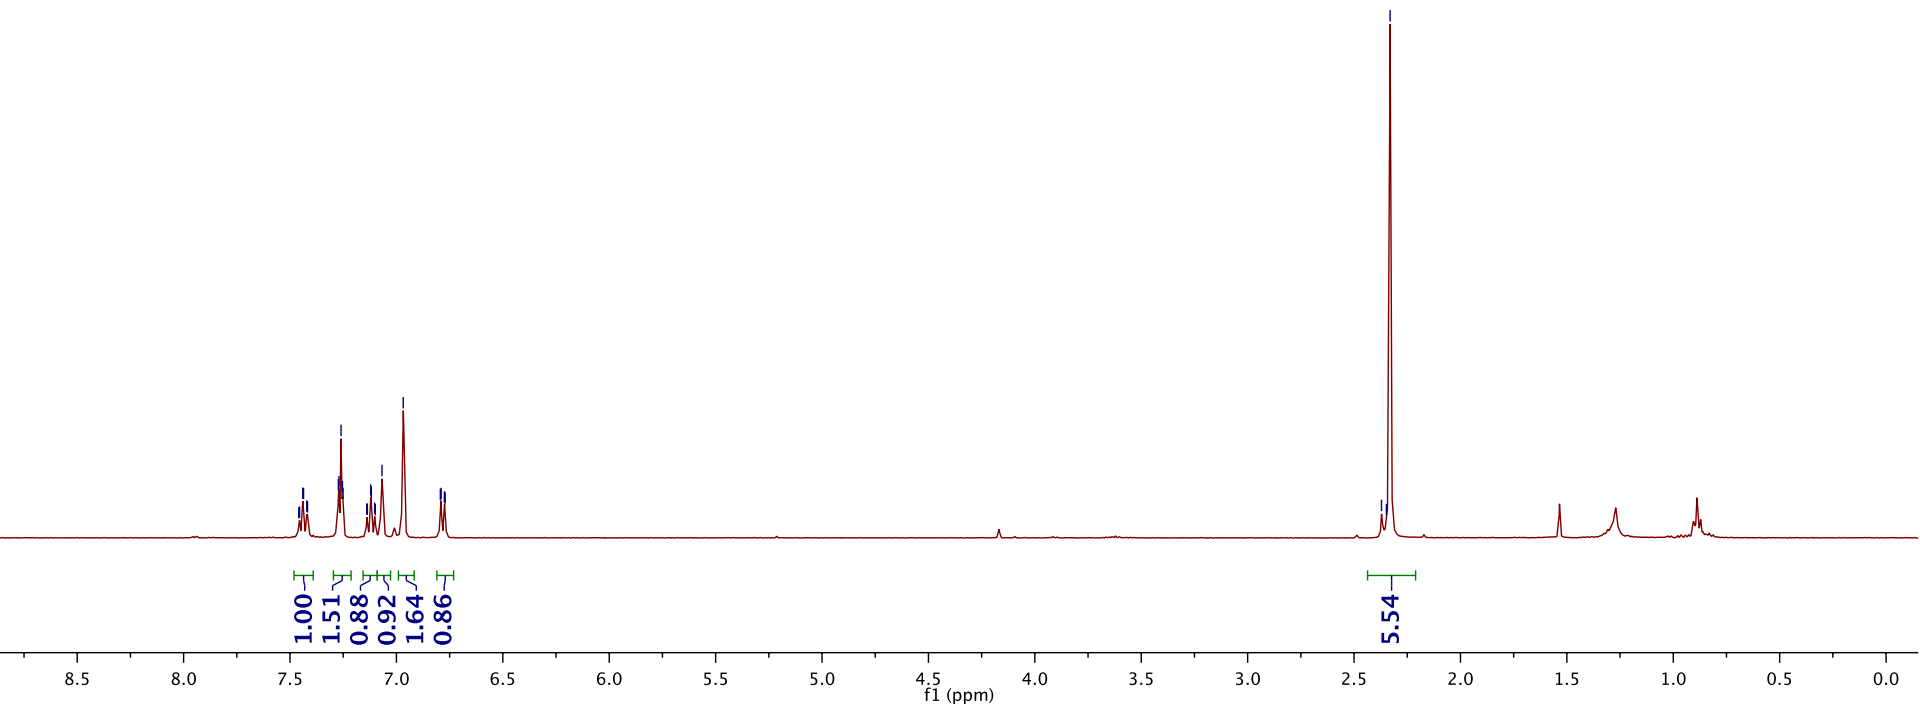

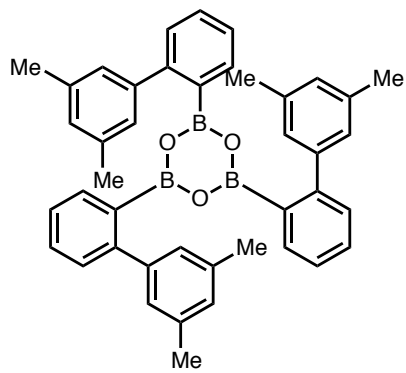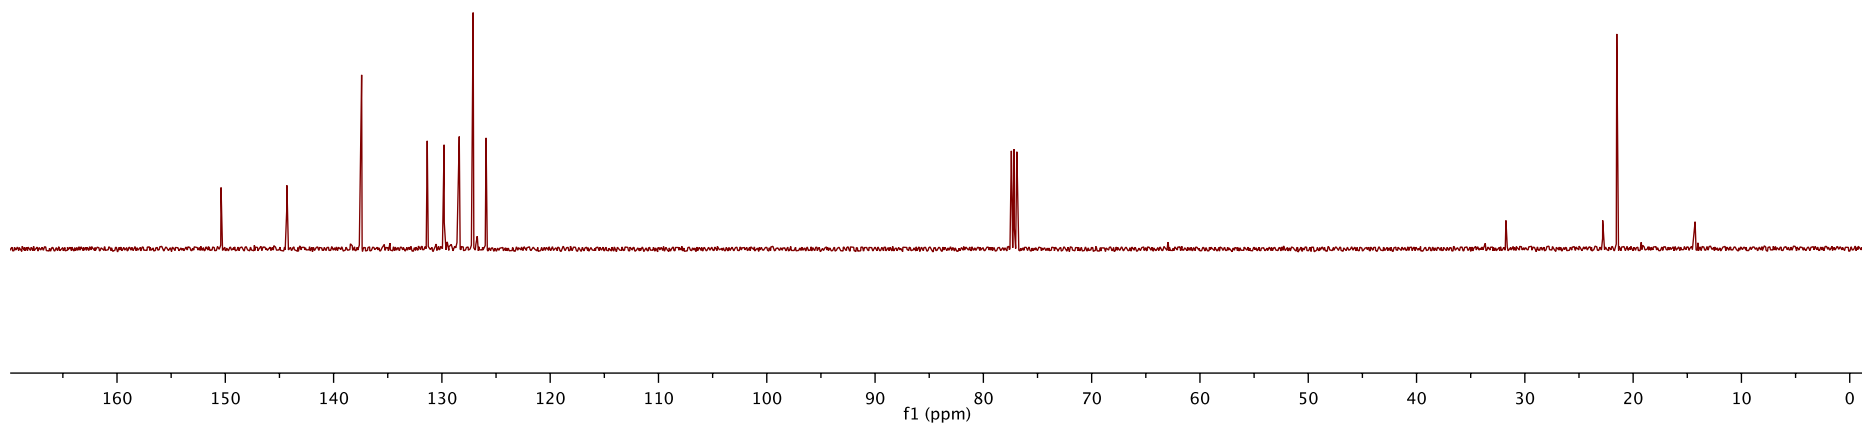

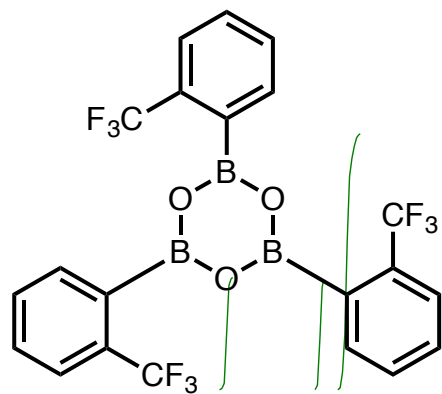

S14

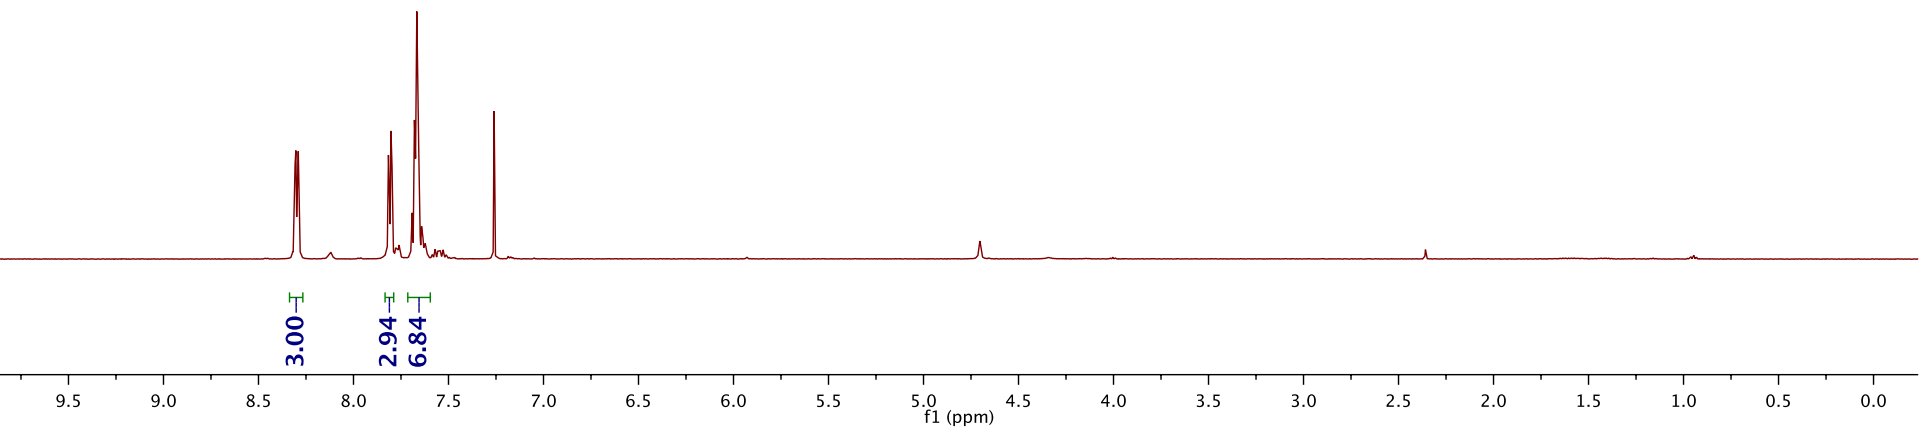

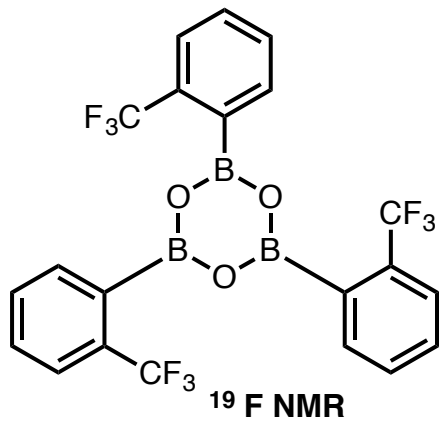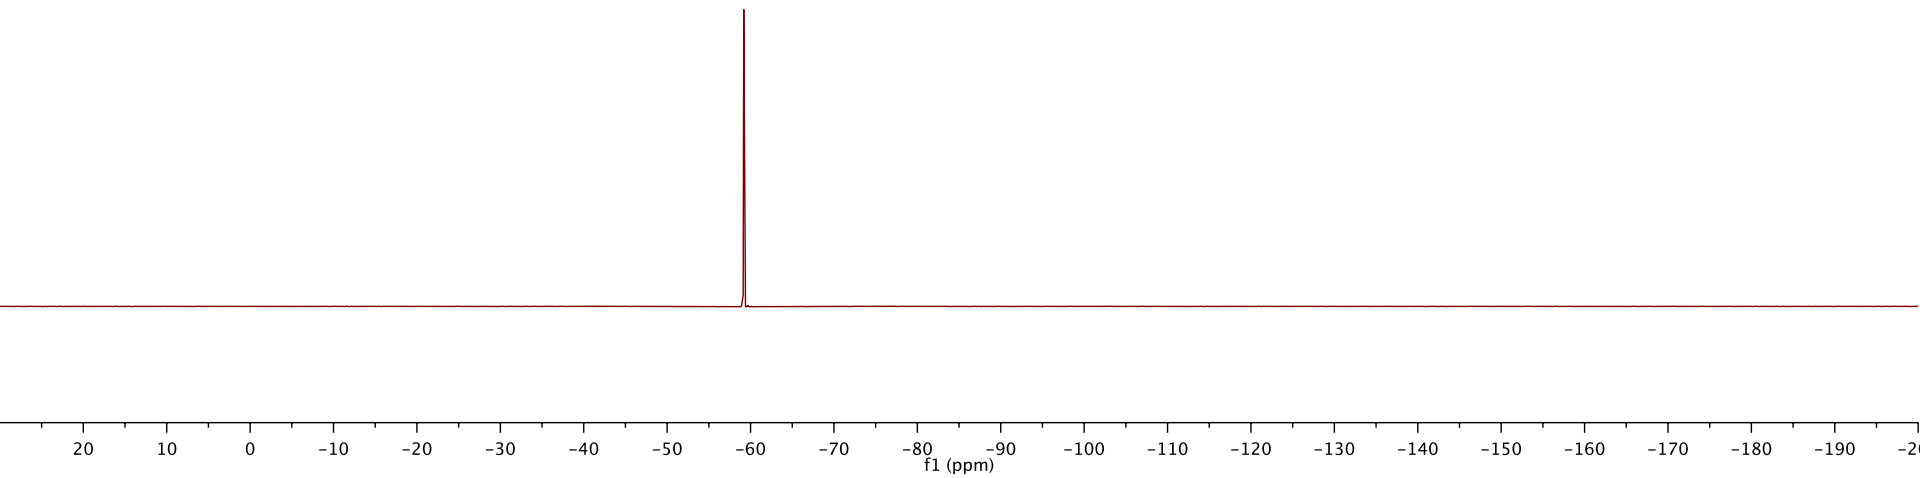

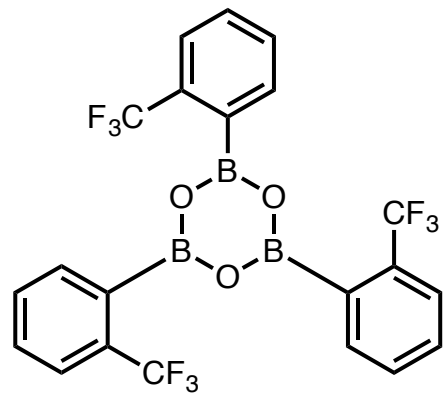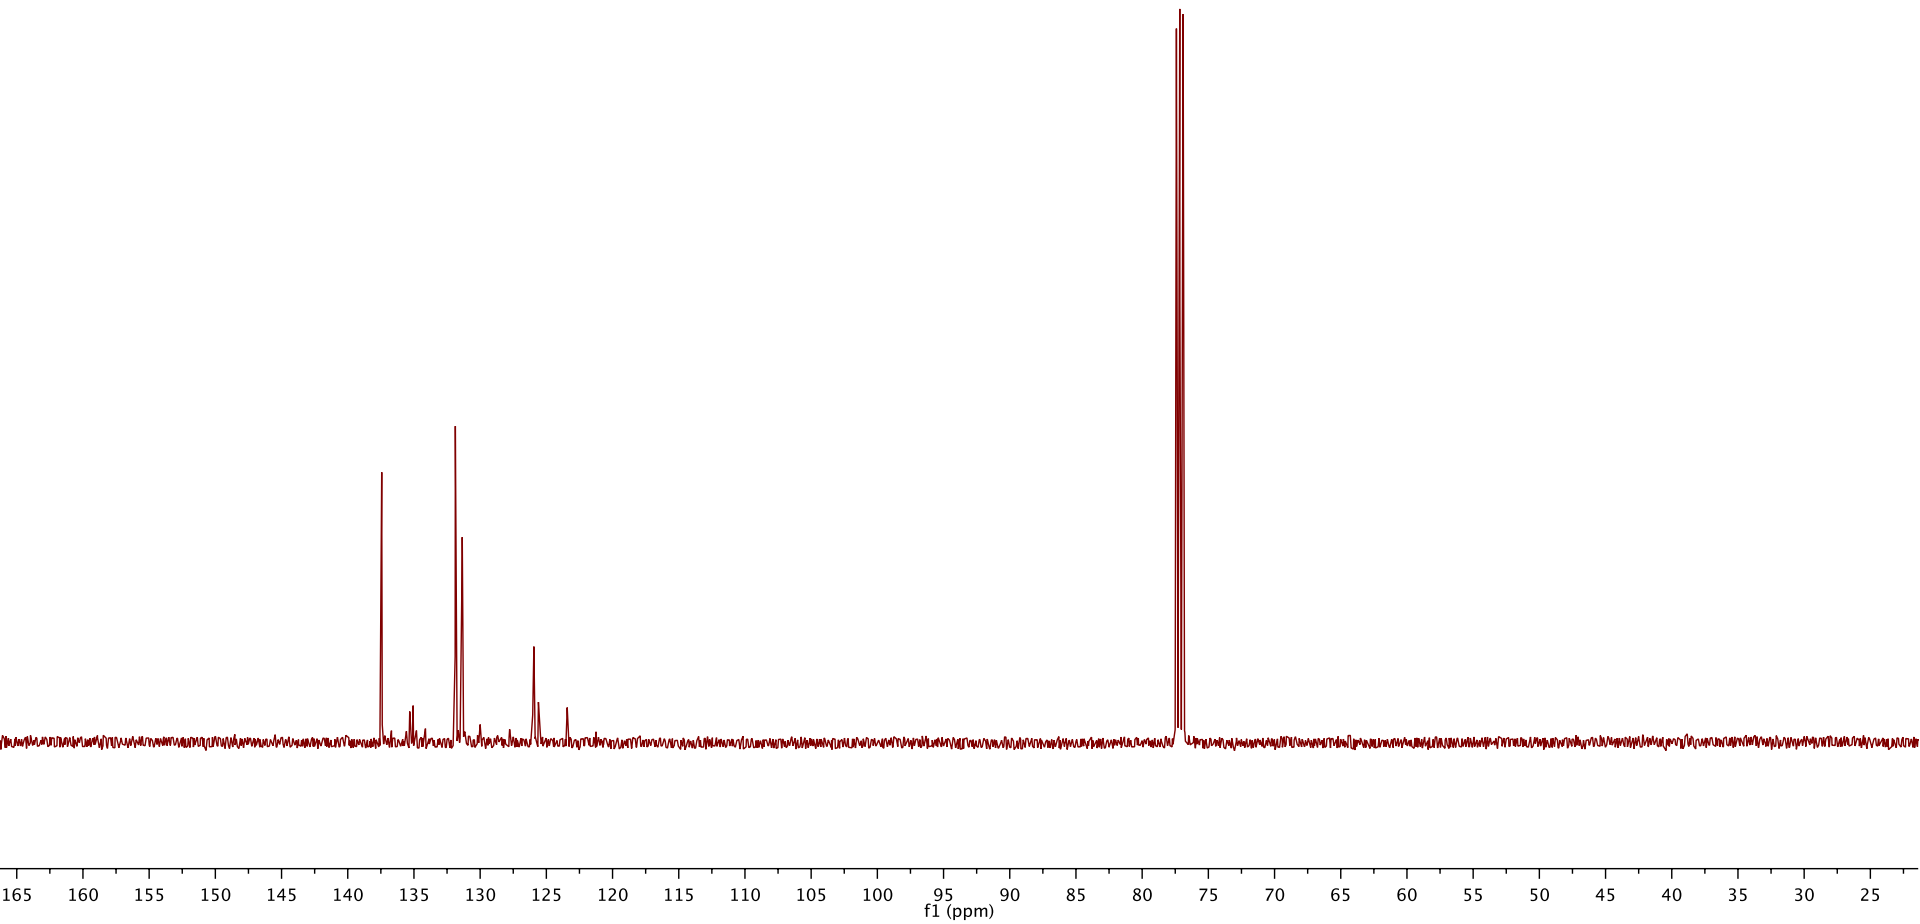

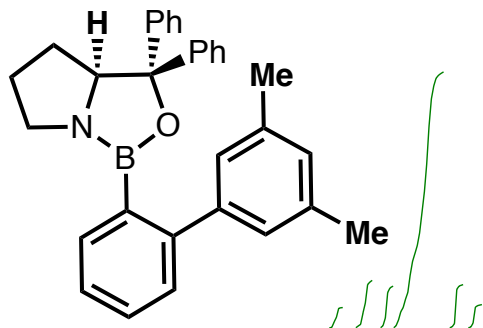

S15

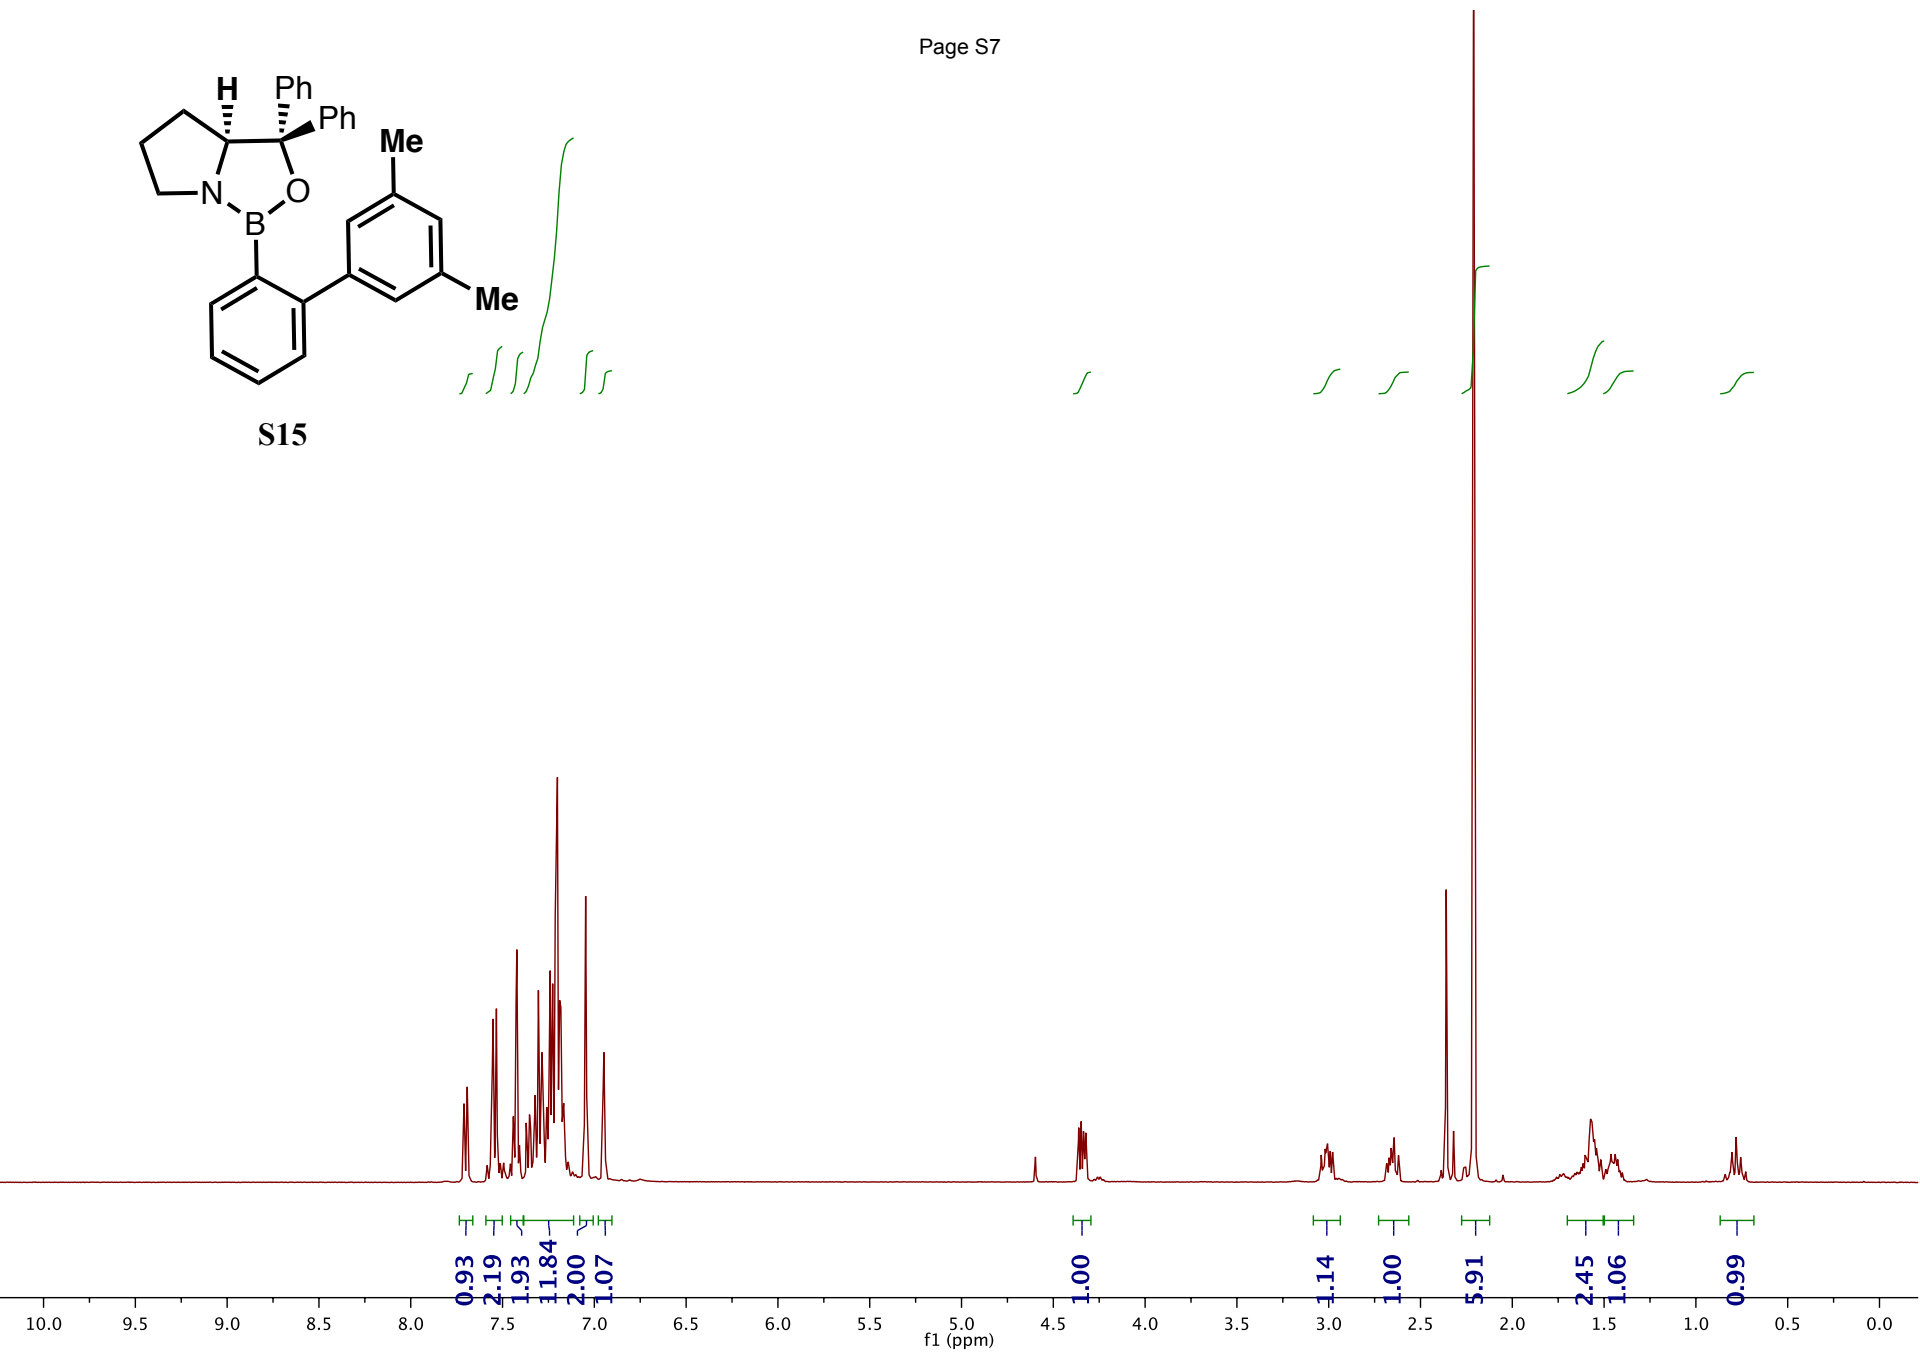

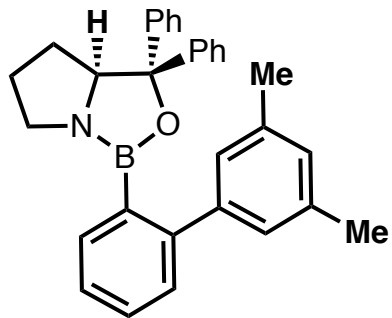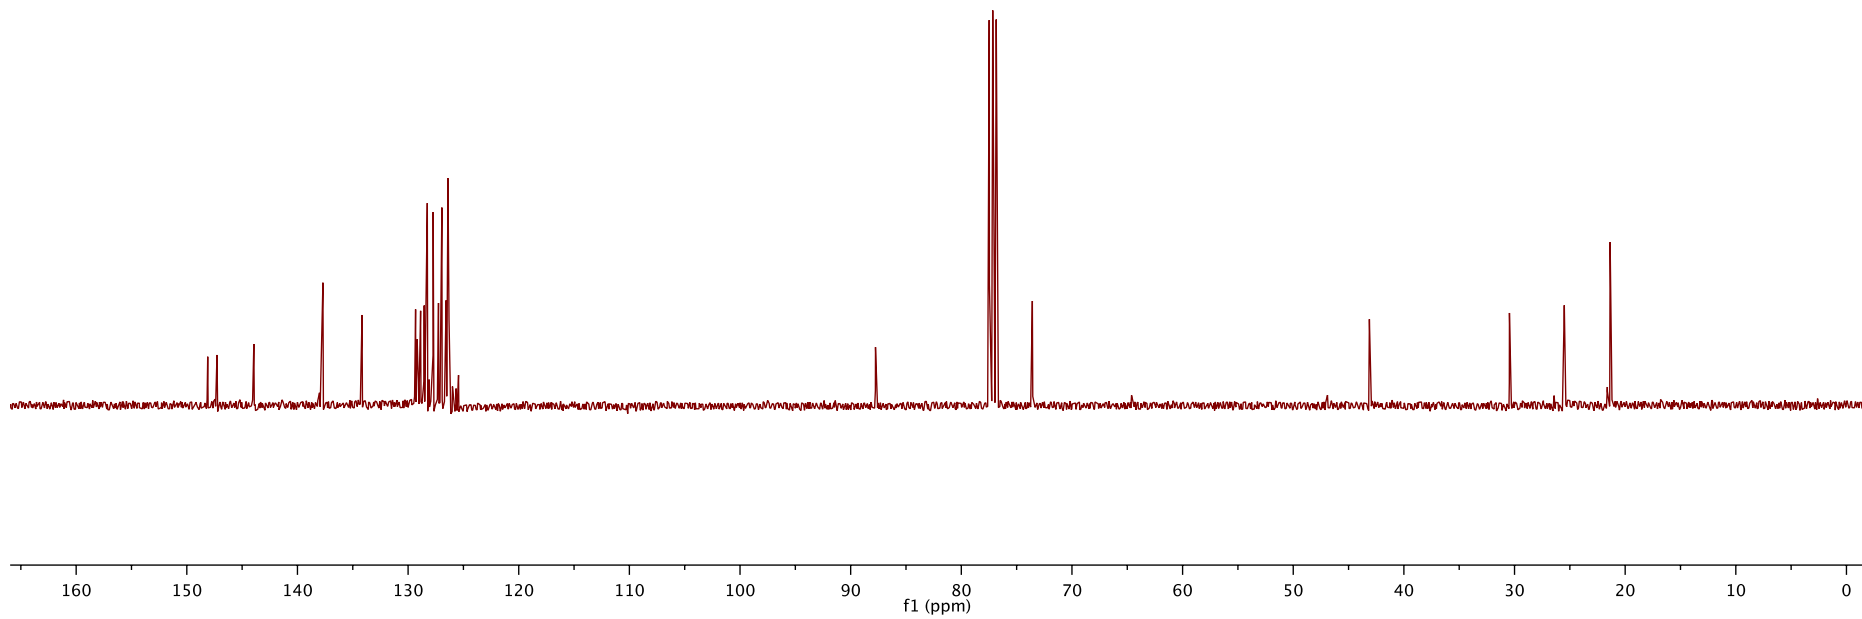



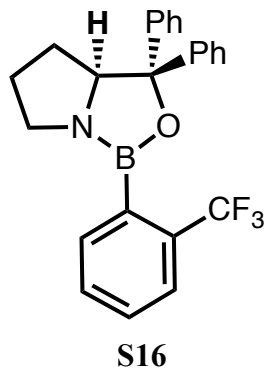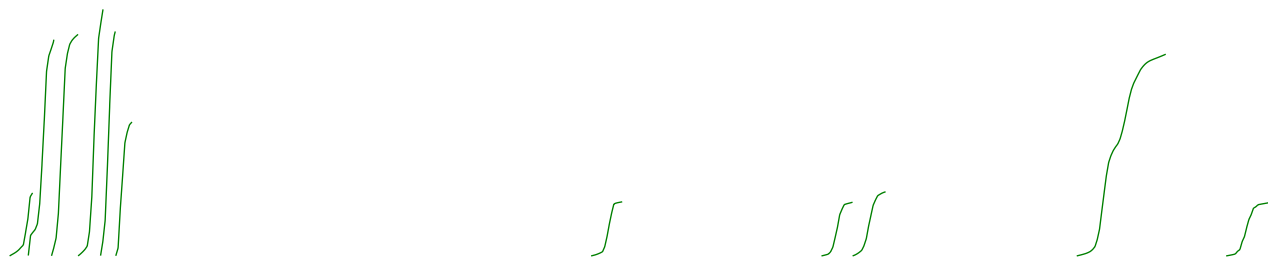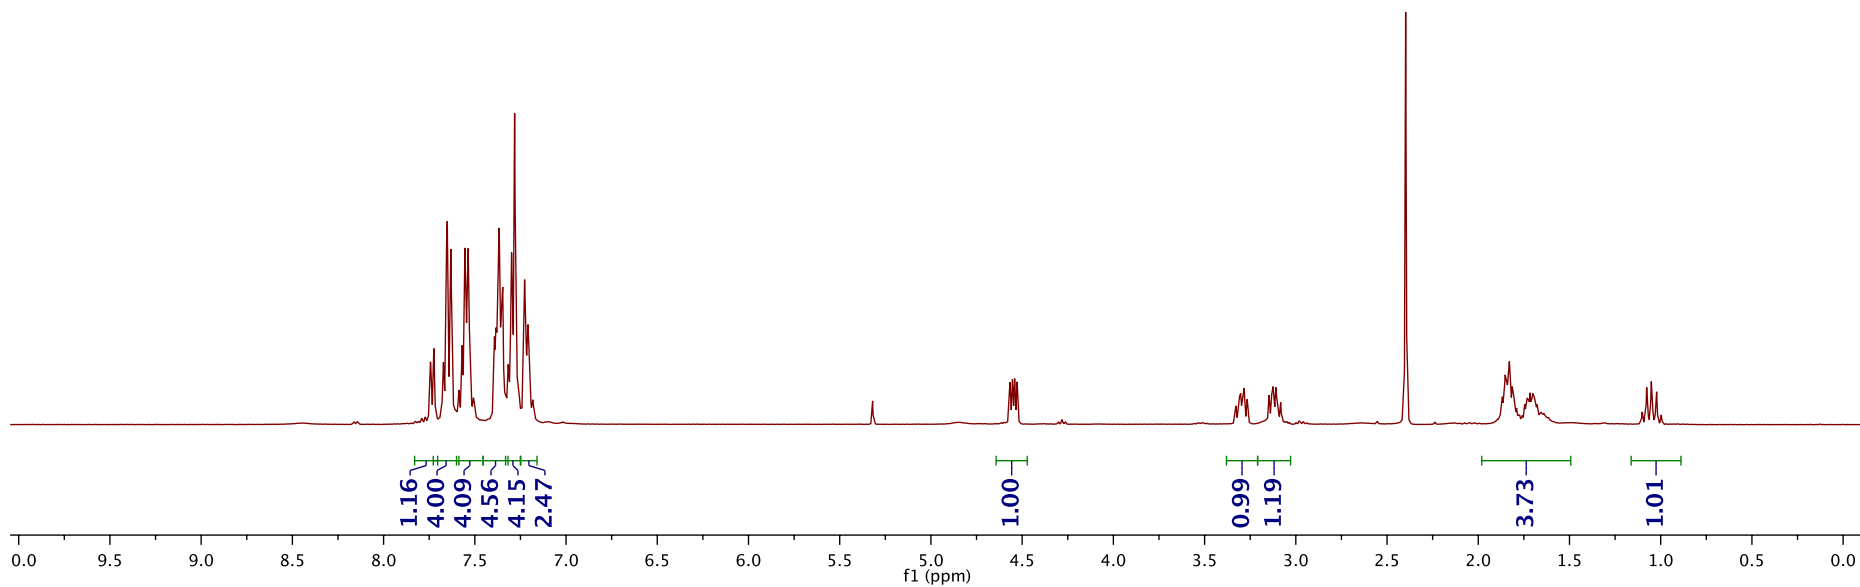

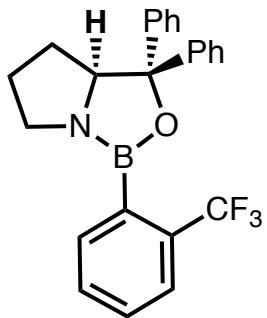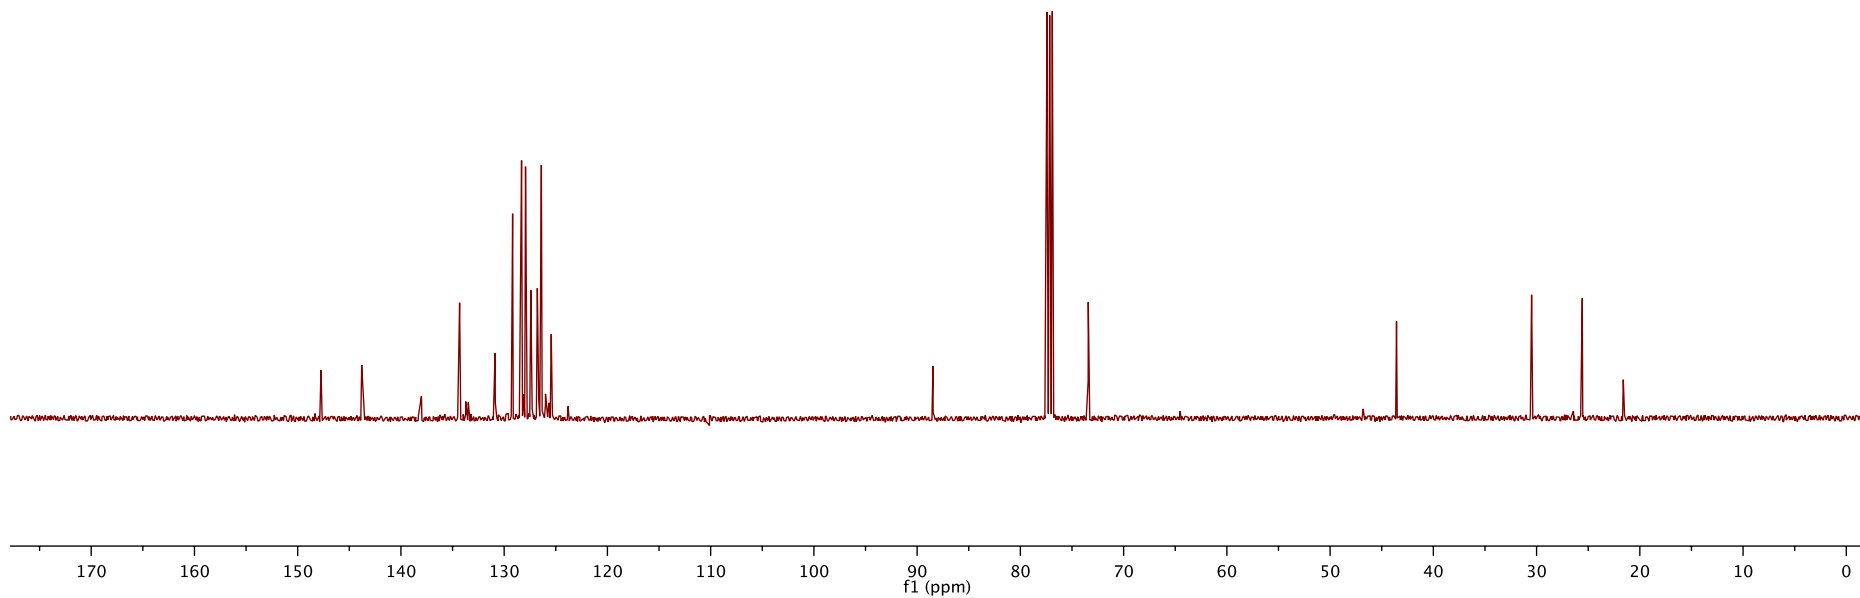

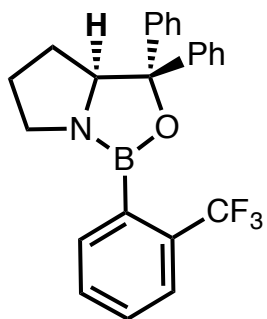

**<sup>19</sup>F NMR**

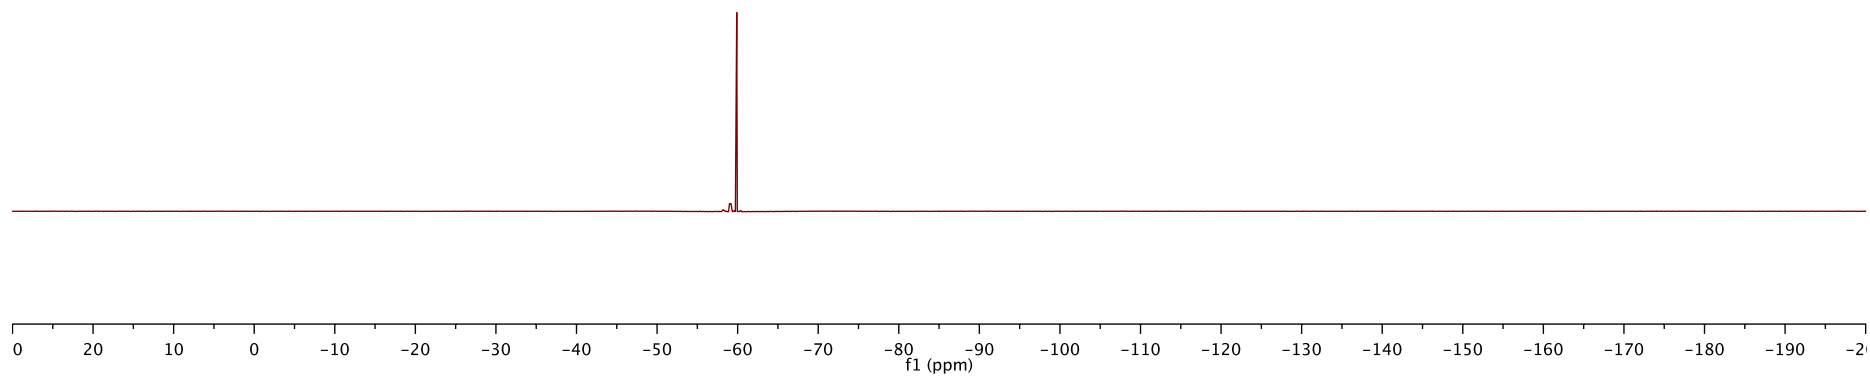

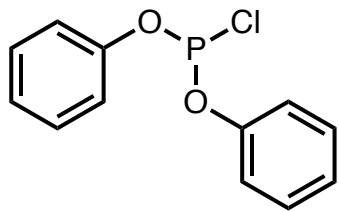

S22

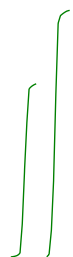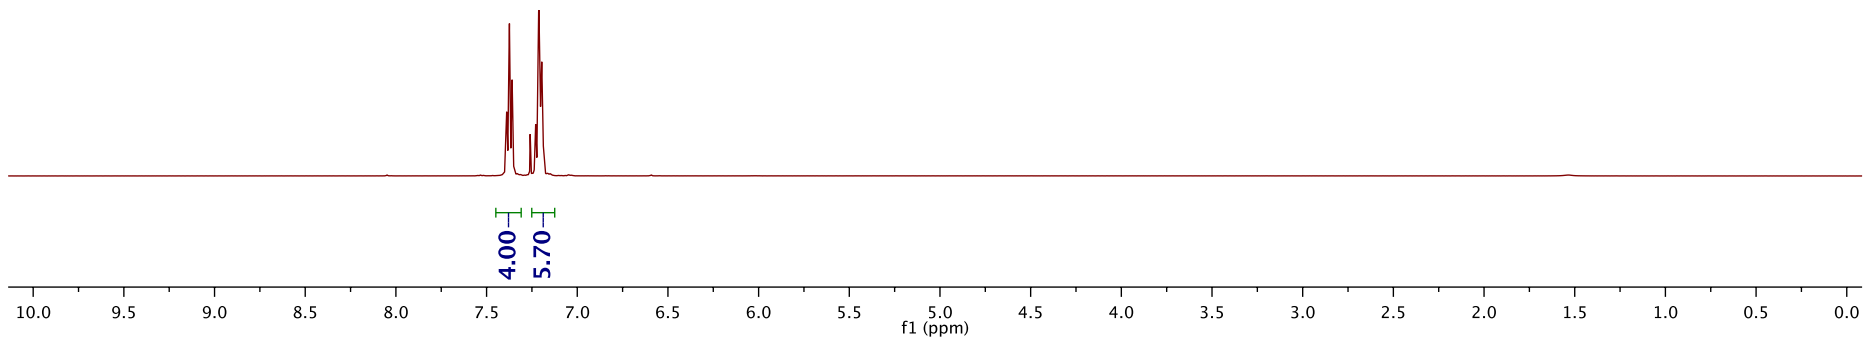

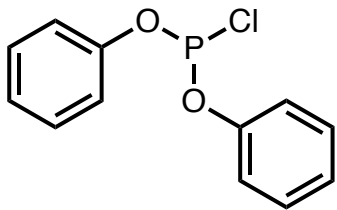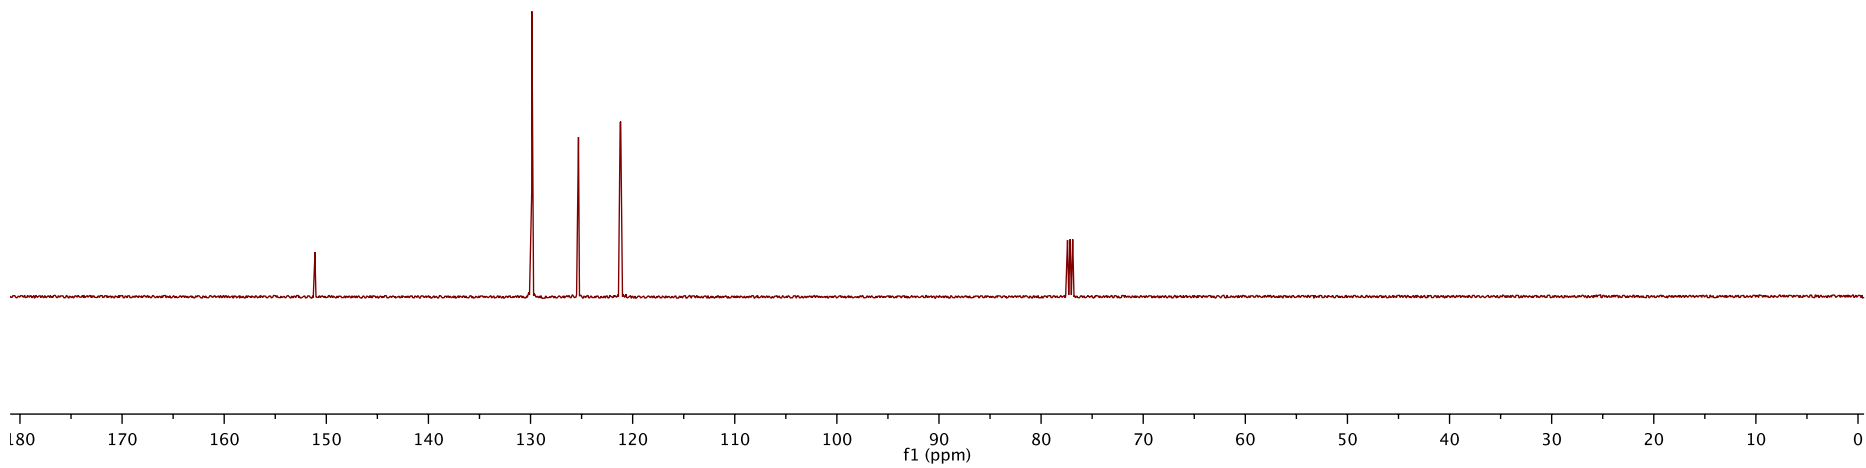

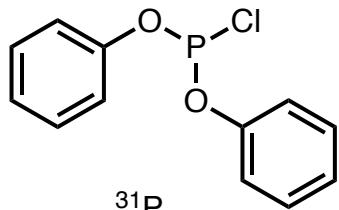

$^{31}\text{P}$

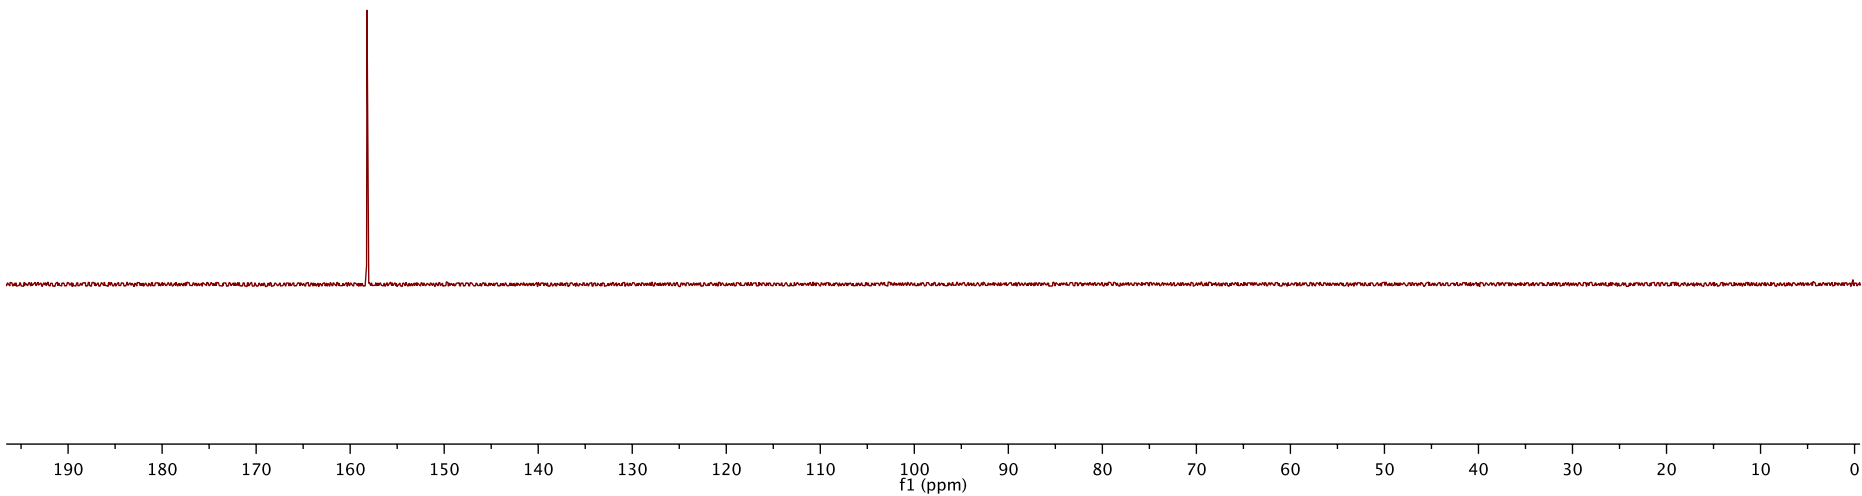

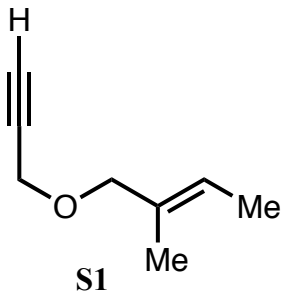

Page S15

5.56  
5.56  
5.55  
5.54  
5.54  
5.53  
5.52  
5.51  
5.50

4.08  
4.08  
4.07  
3.95  
3.92

2.41  
2.40  
2.39

1.65  
1.65  
1.65  
1.64  
1.63  
1.62

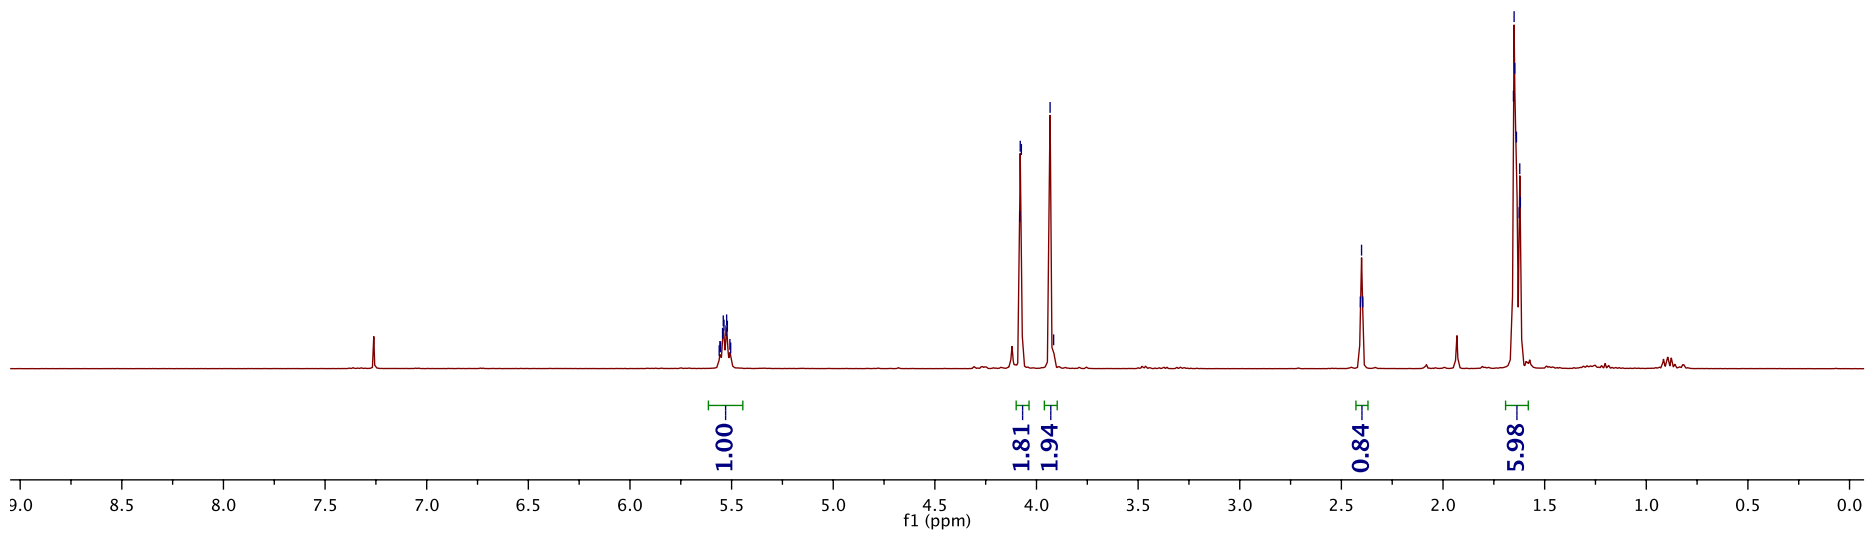

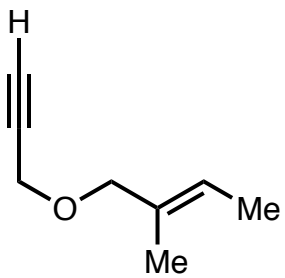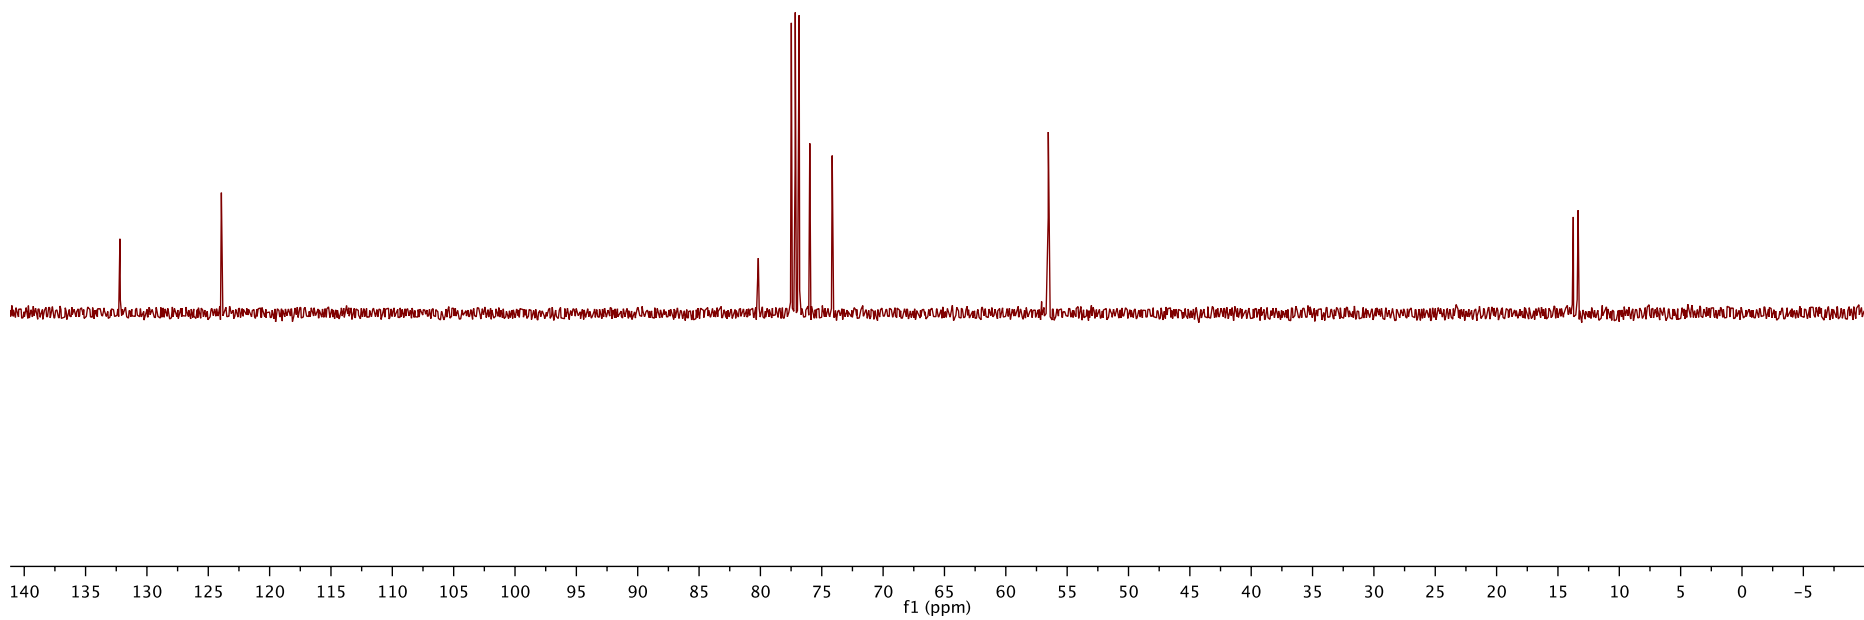



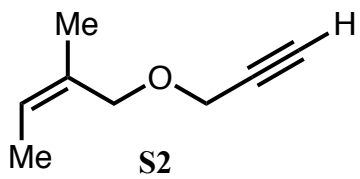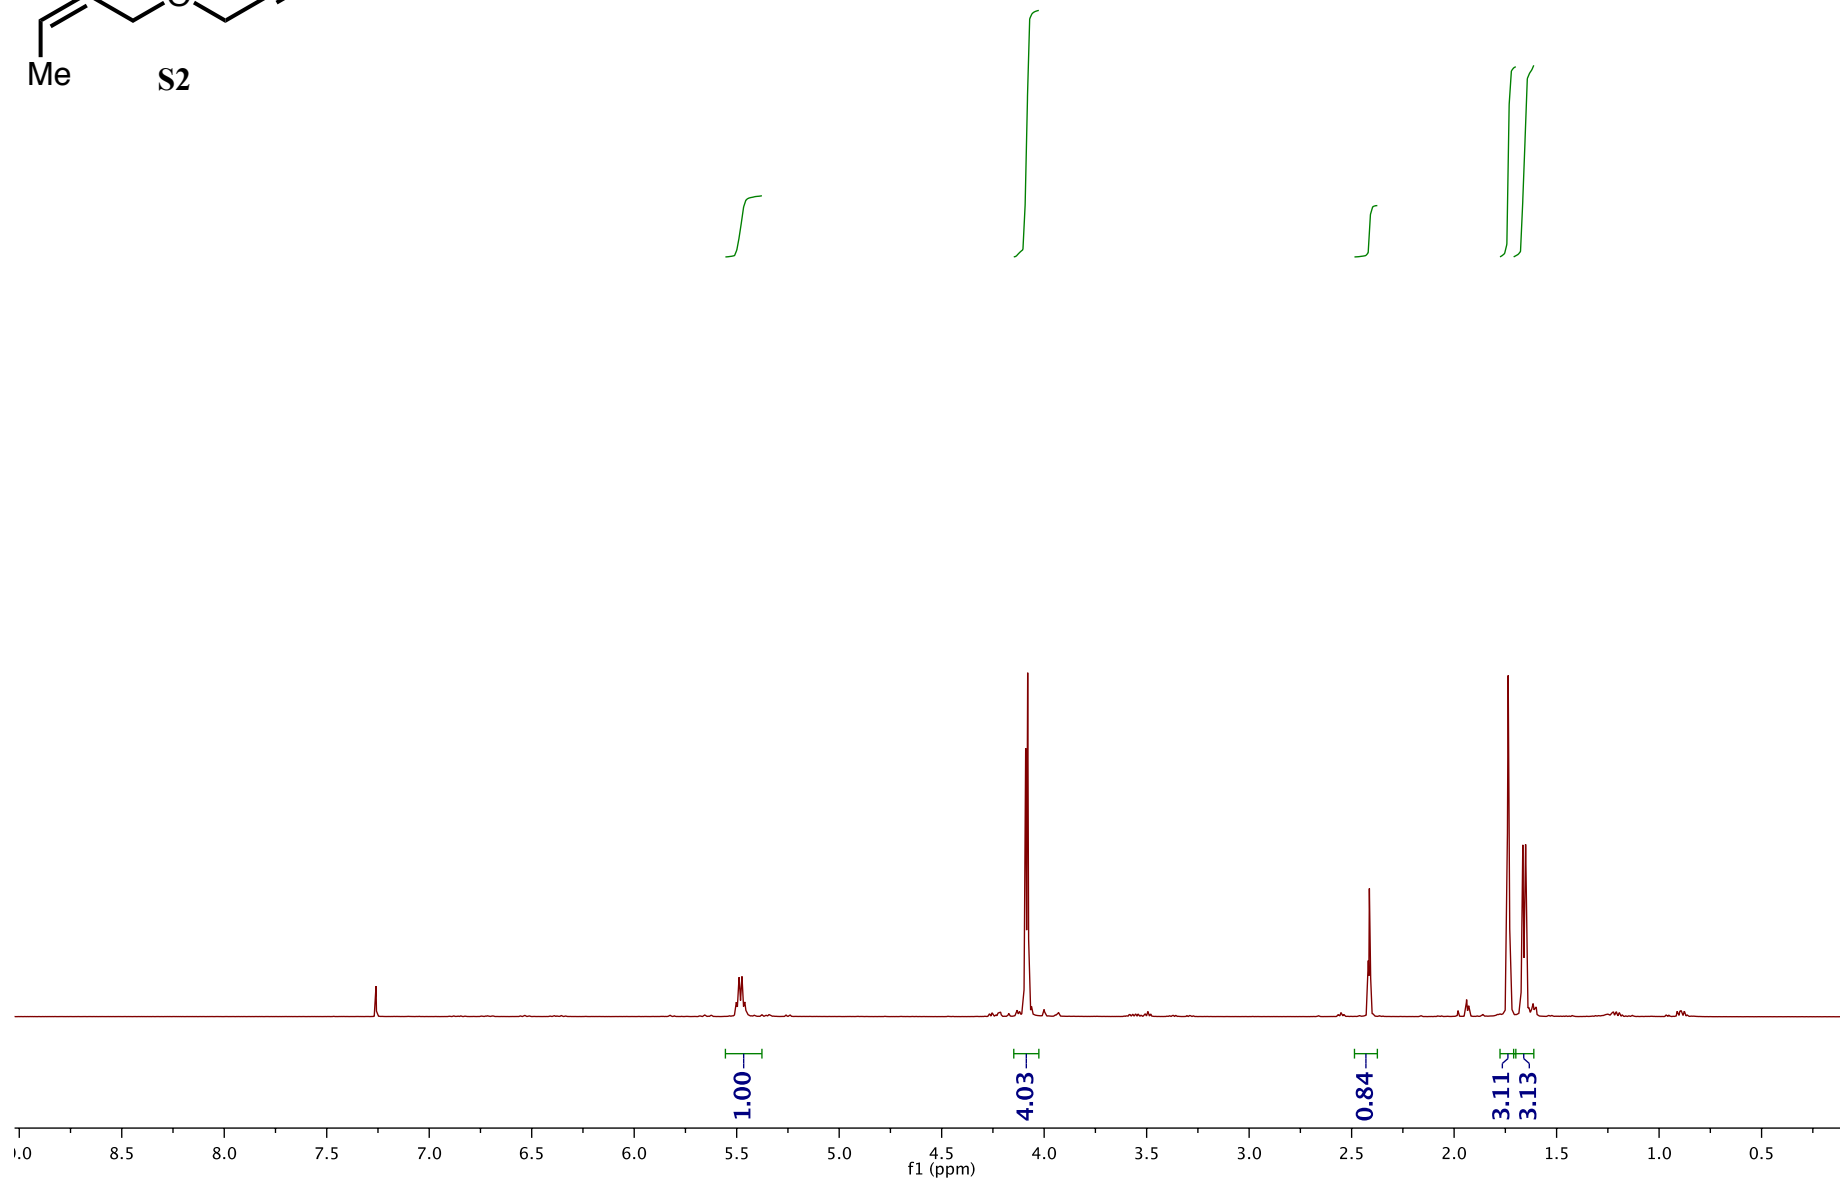

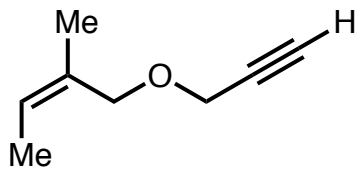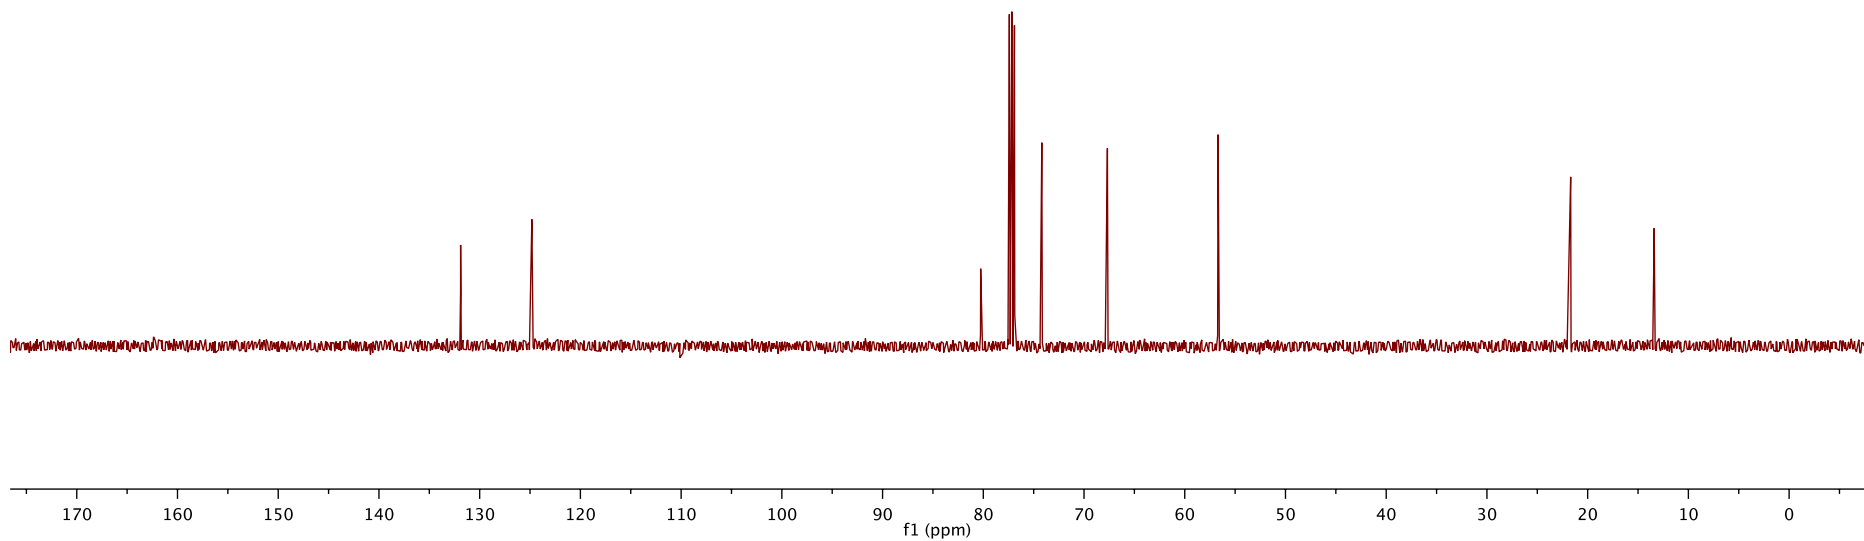

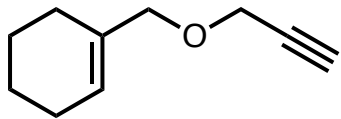

S3

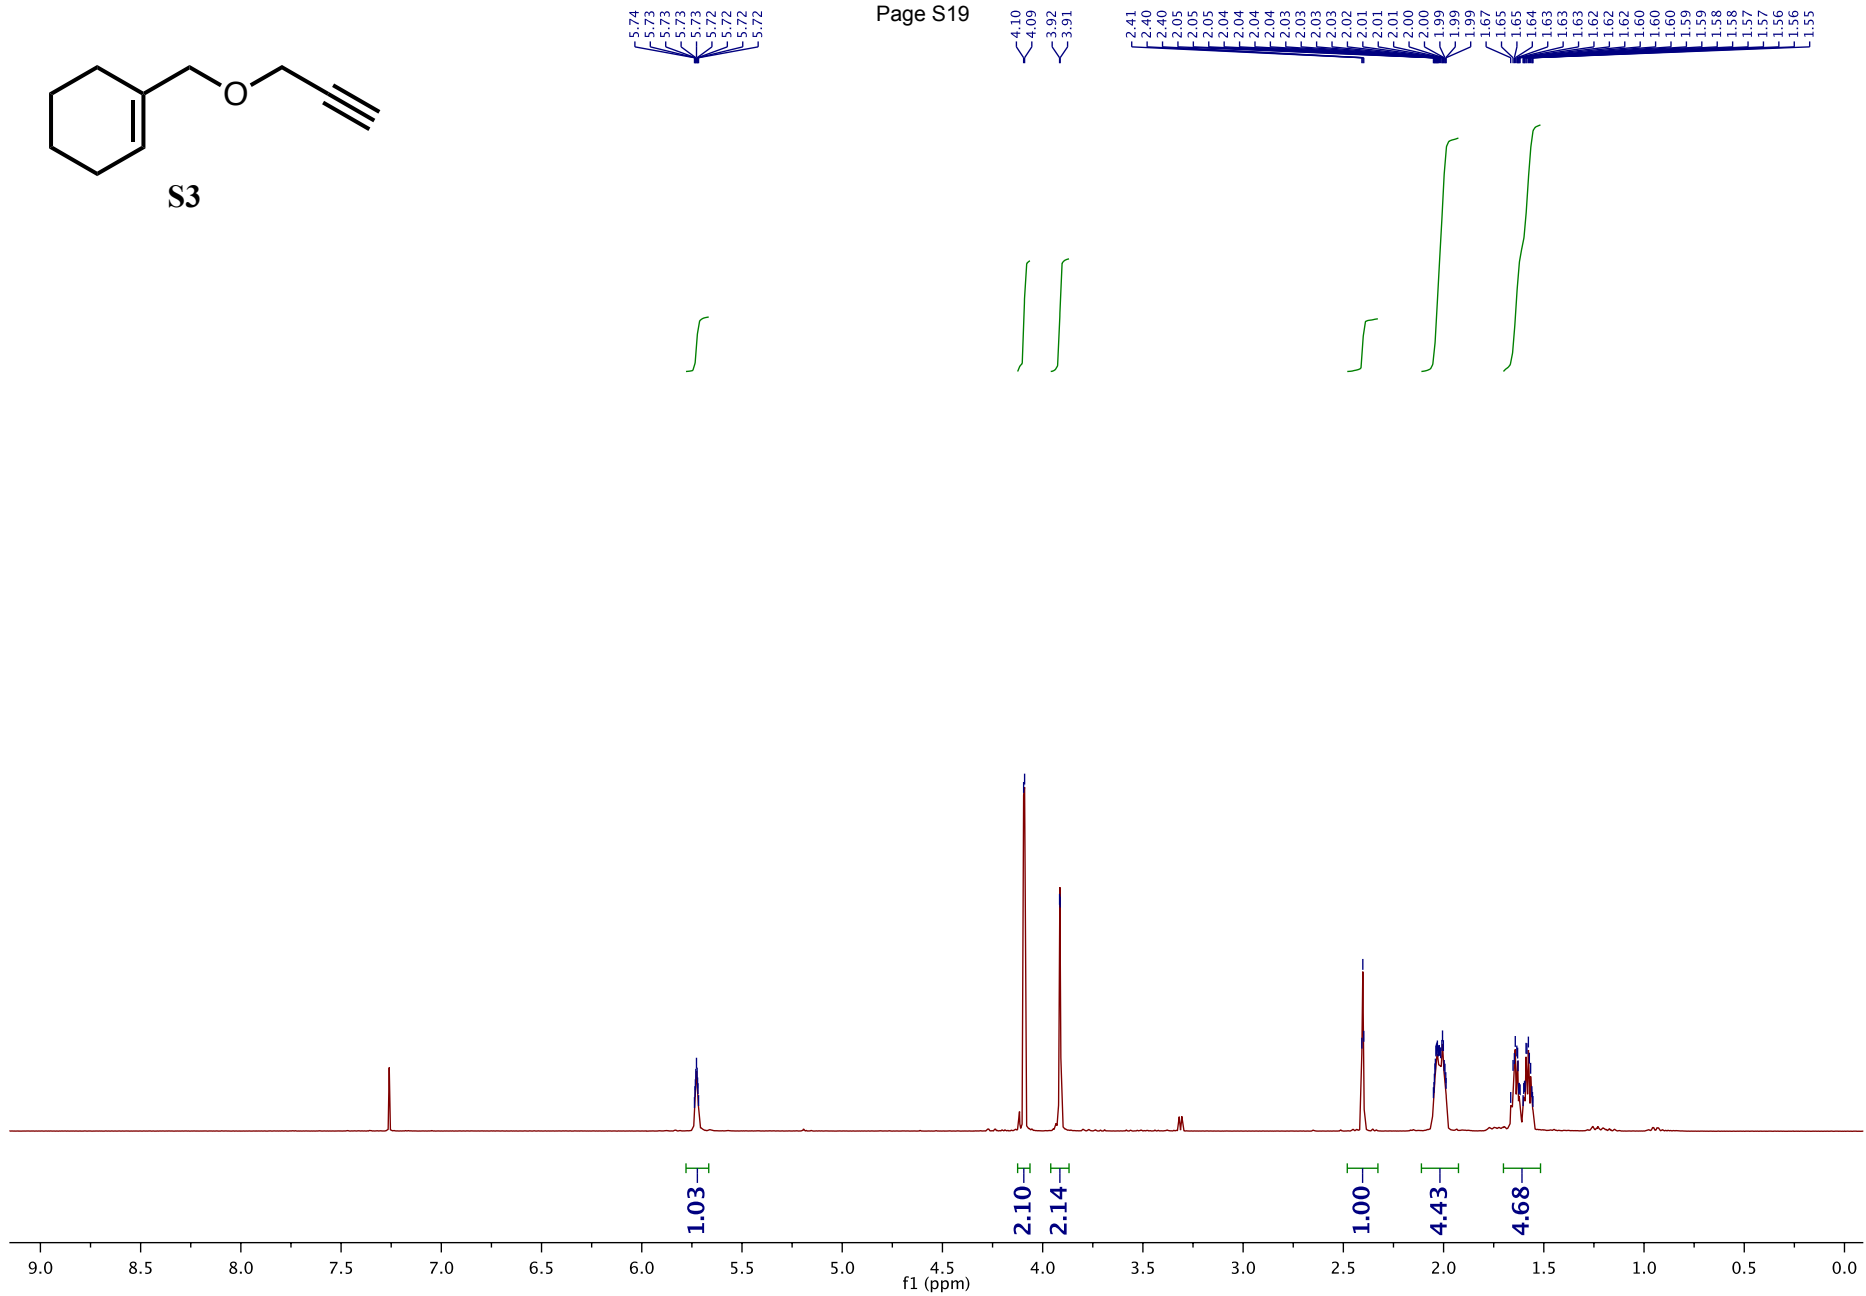

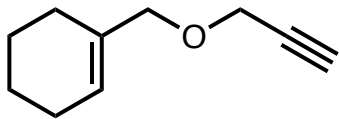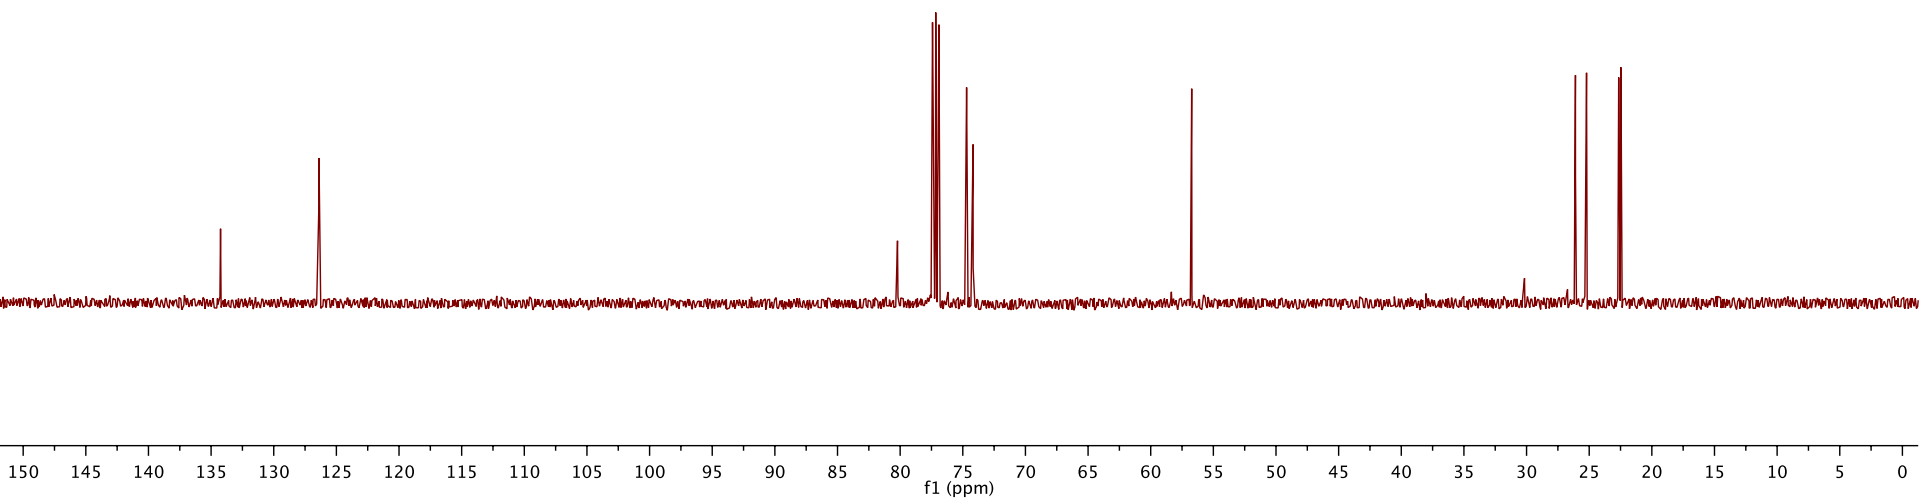

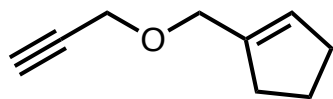

S4

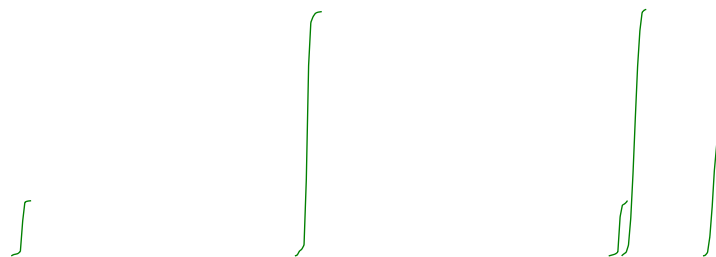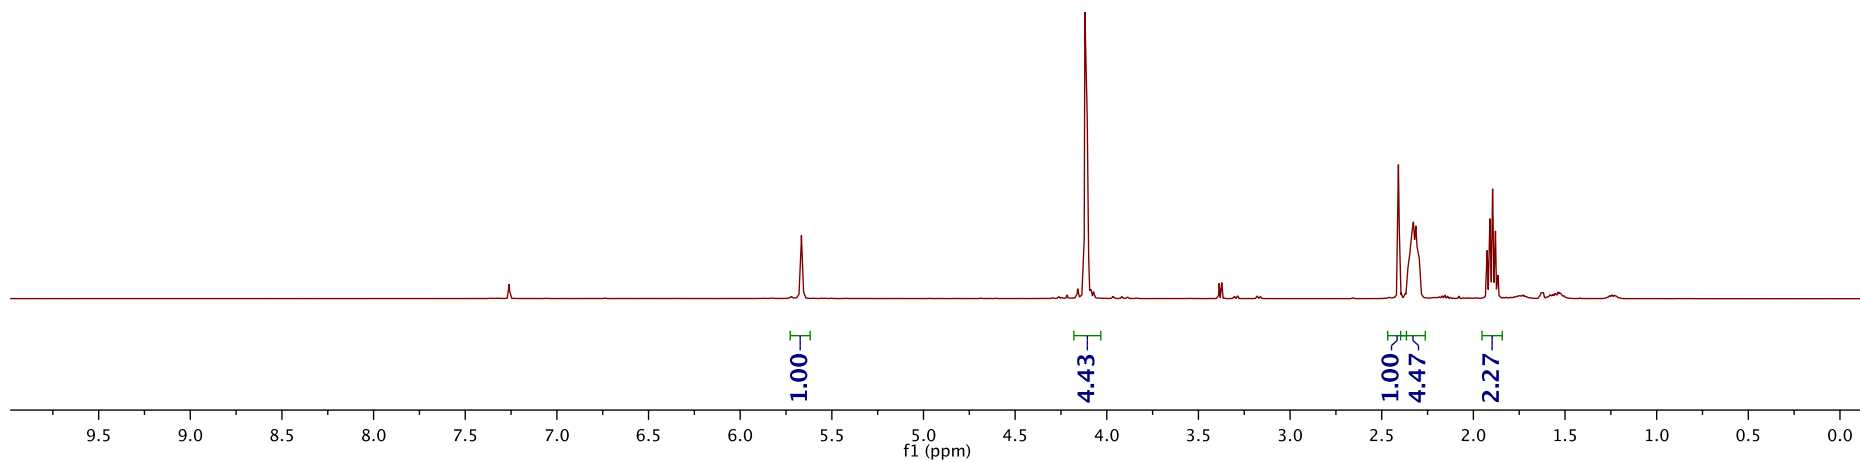

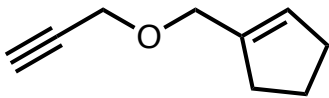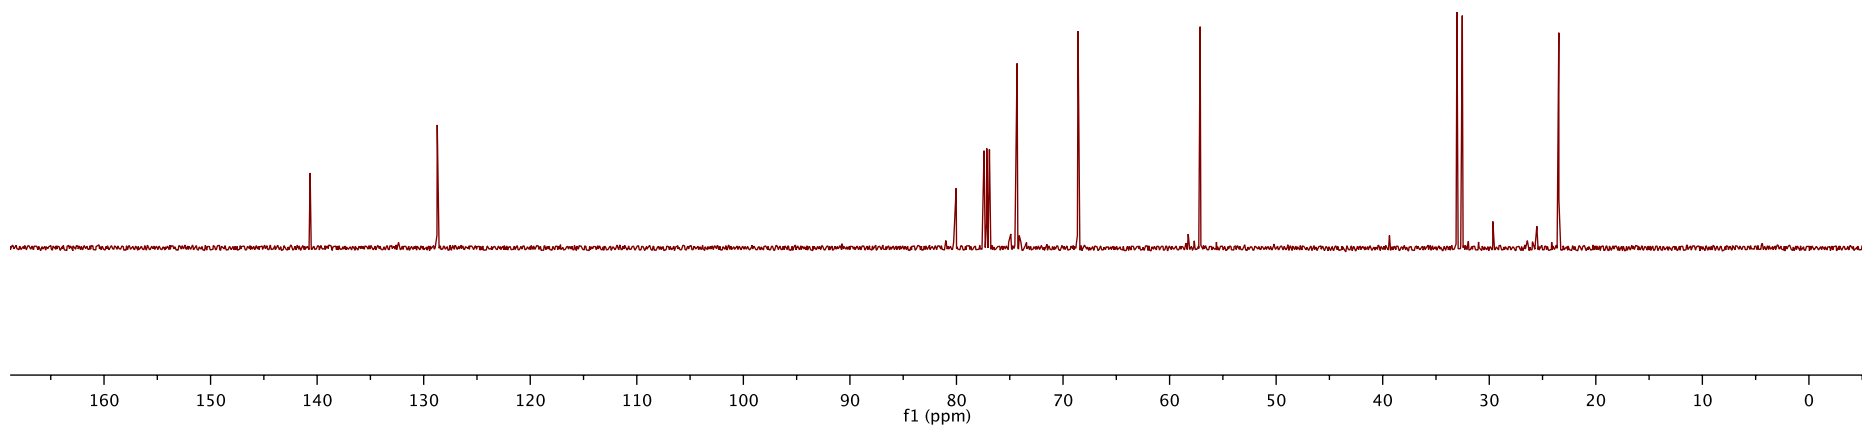

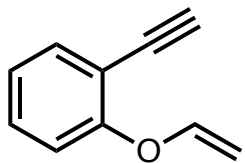

S19

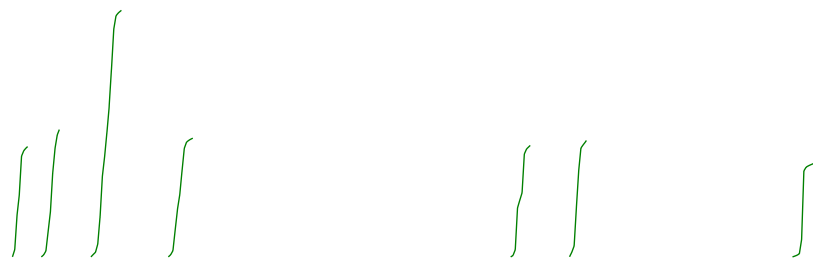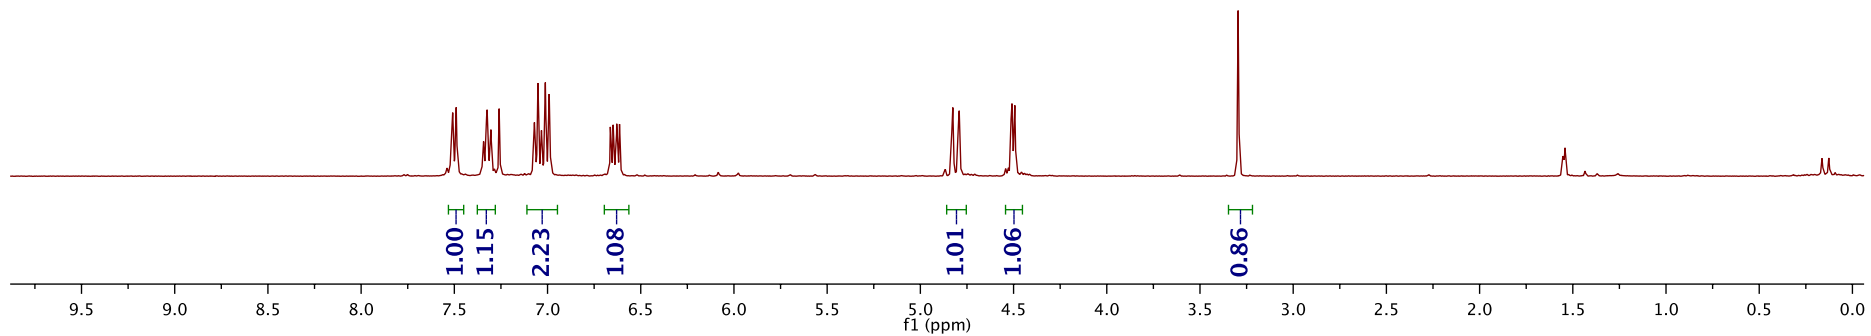

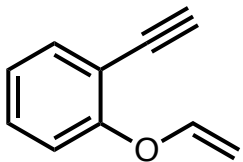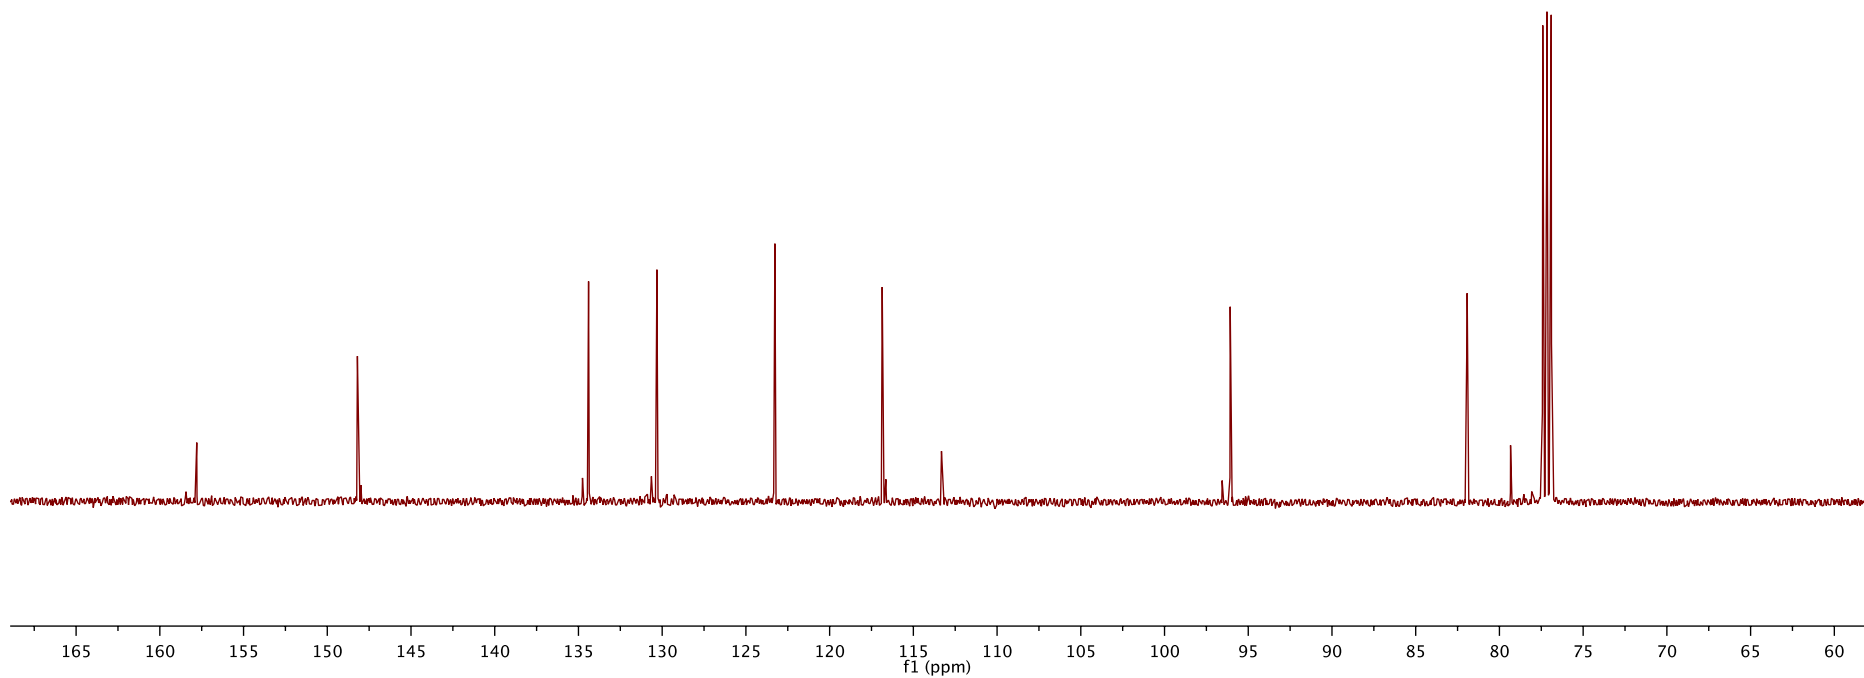



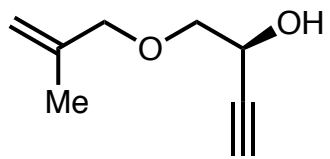

29

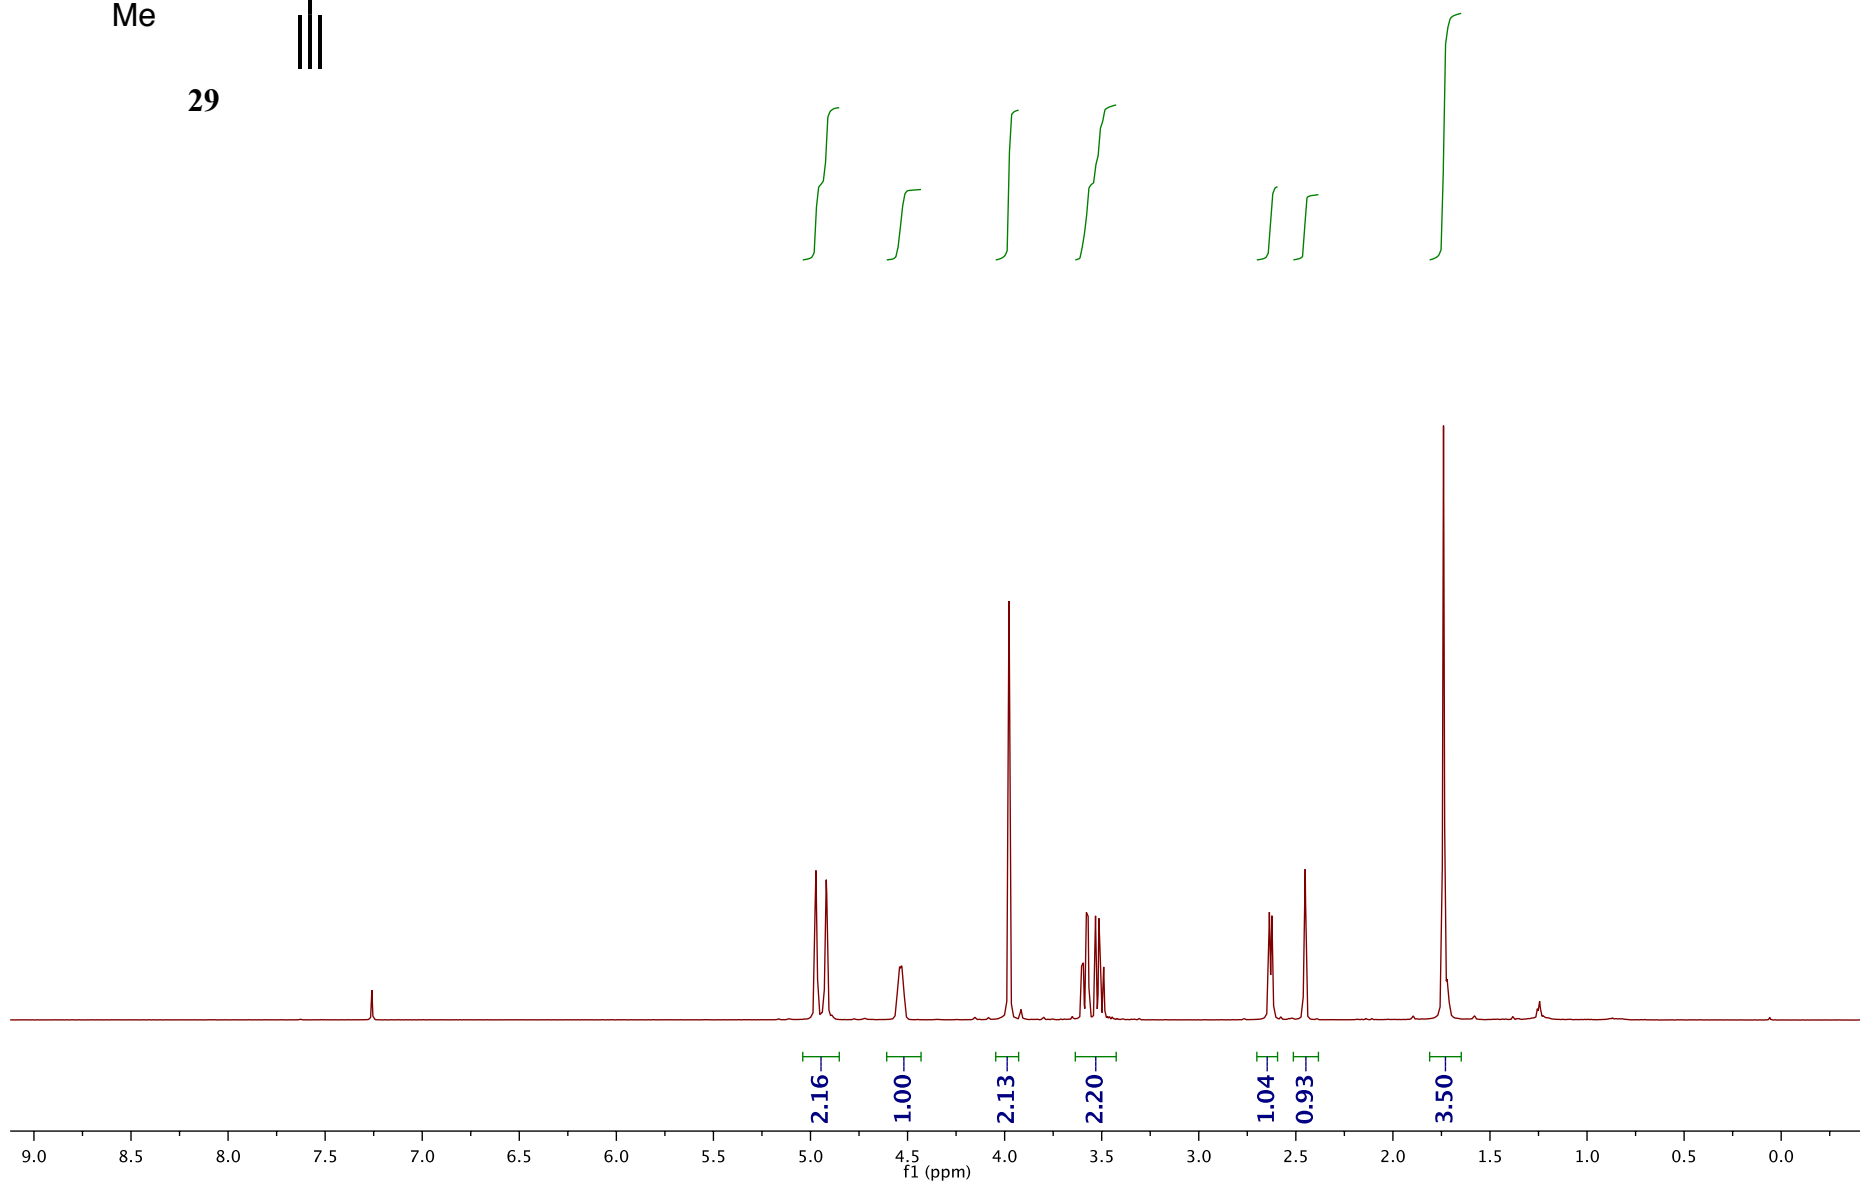

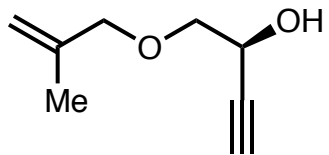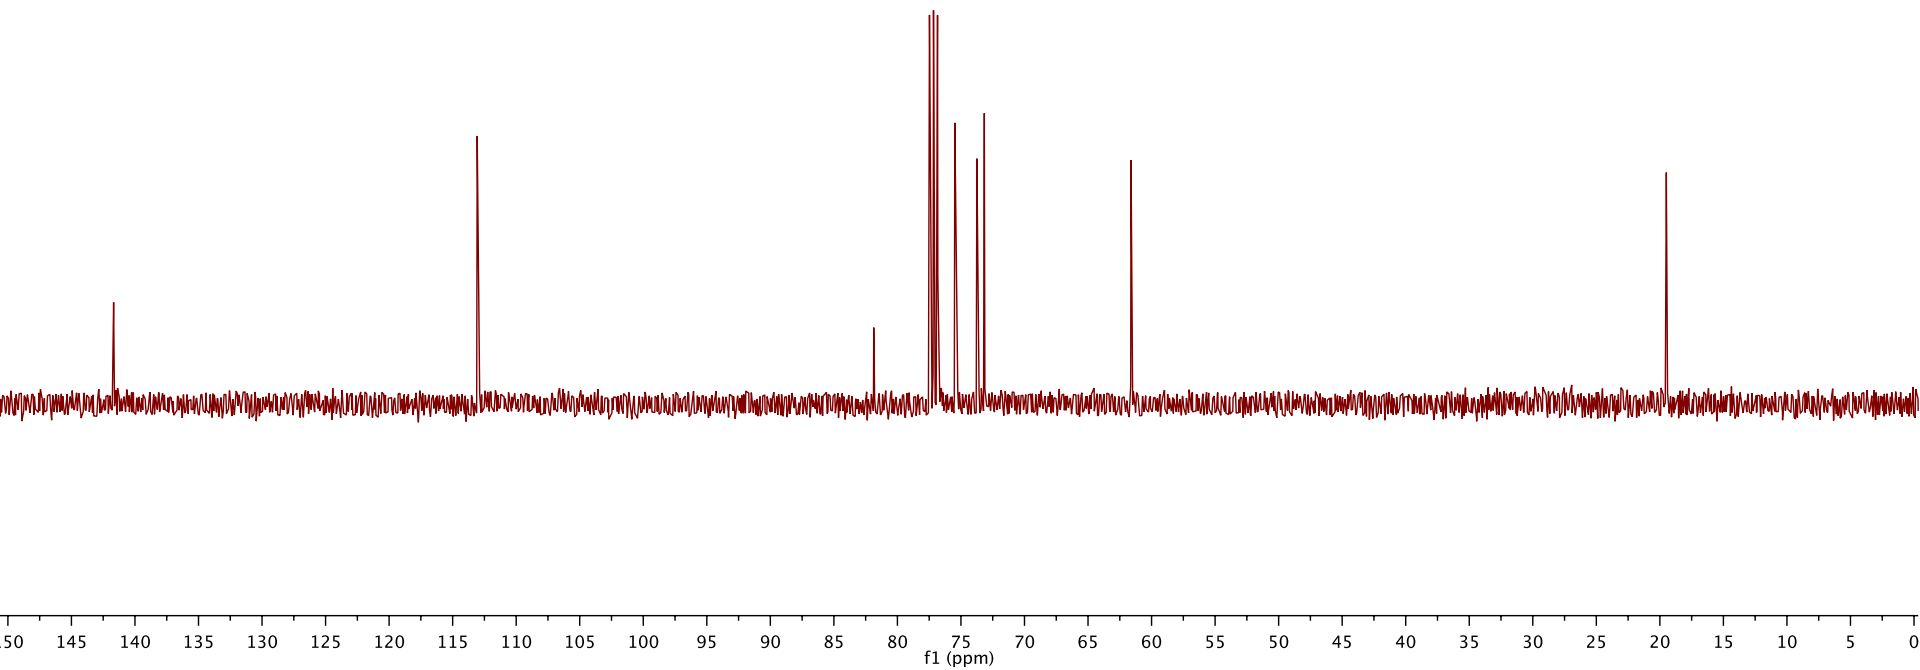

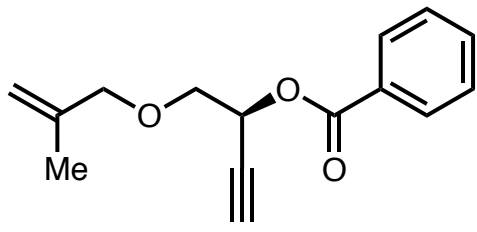

S21

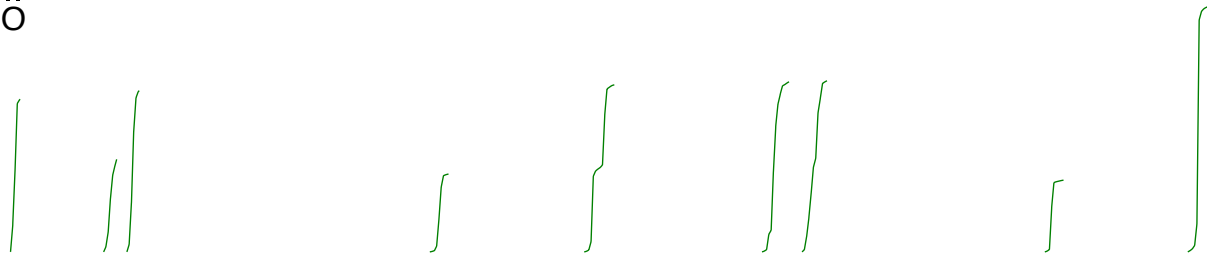

1.96

1.19

2.07

1.00

2.14

2.18

2.20

0.92

3.16

9.5 9.0 8.5 8.0 7.5 7.0 6.5 6.0 5.5 5.0 4.5 4.0 3.5 3.0 2.5 2.0 1.5 1.0 0.5 0.0

f1 (ppm)

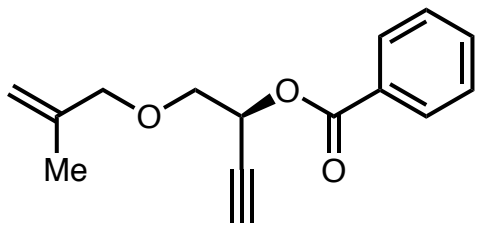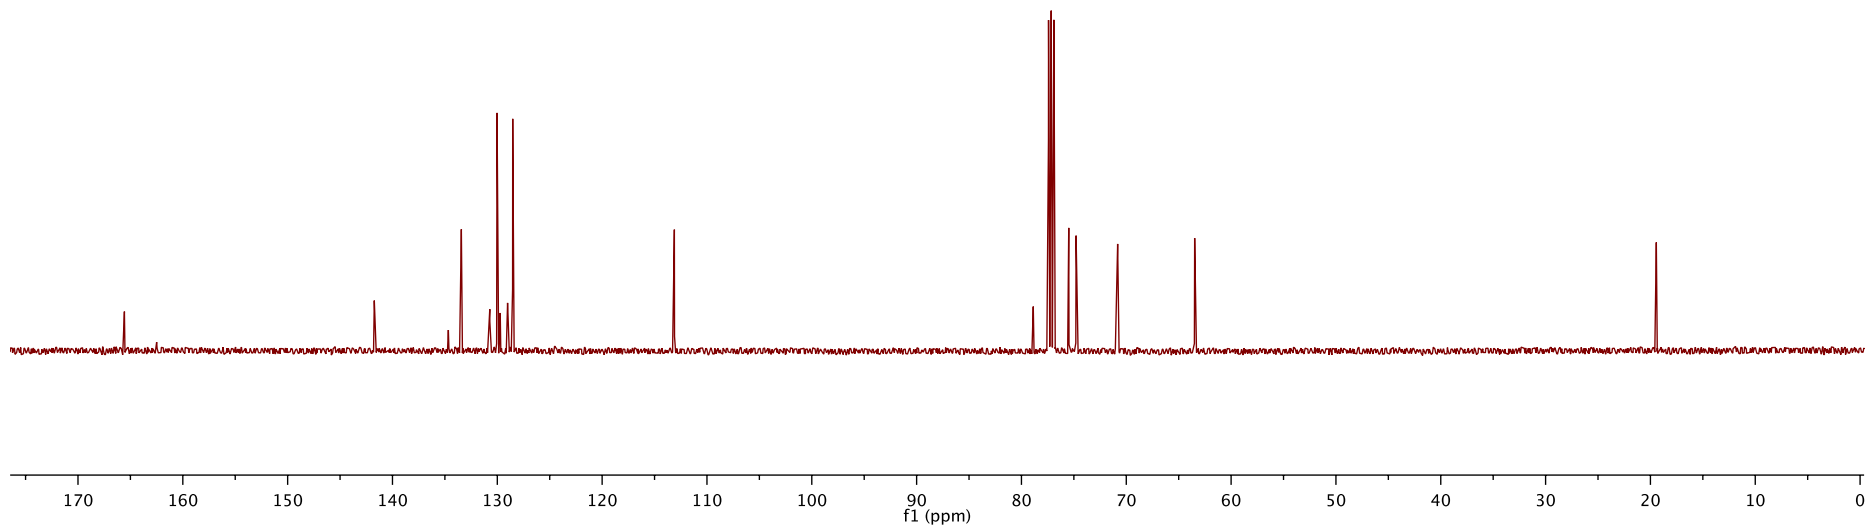

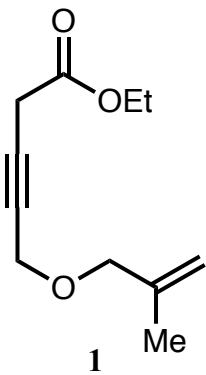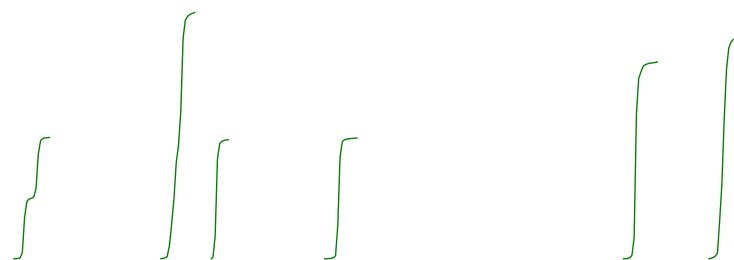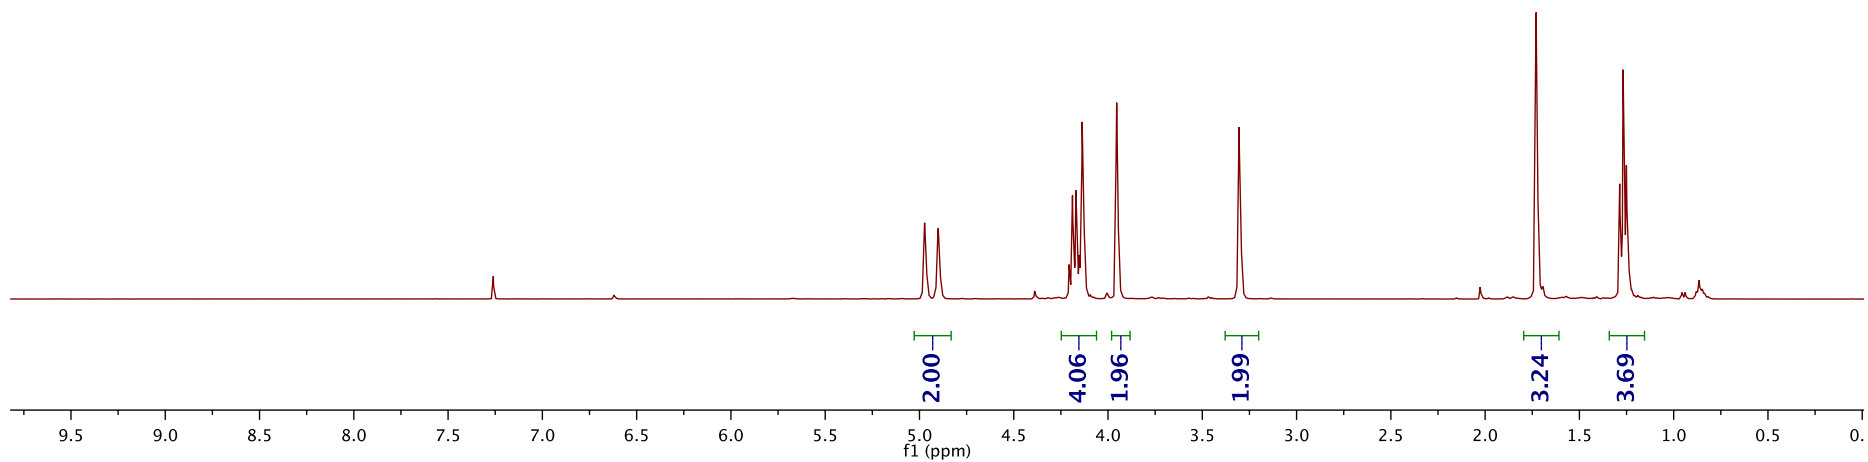

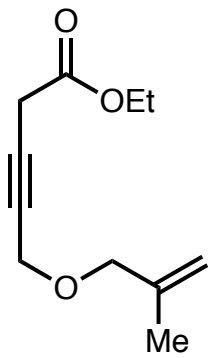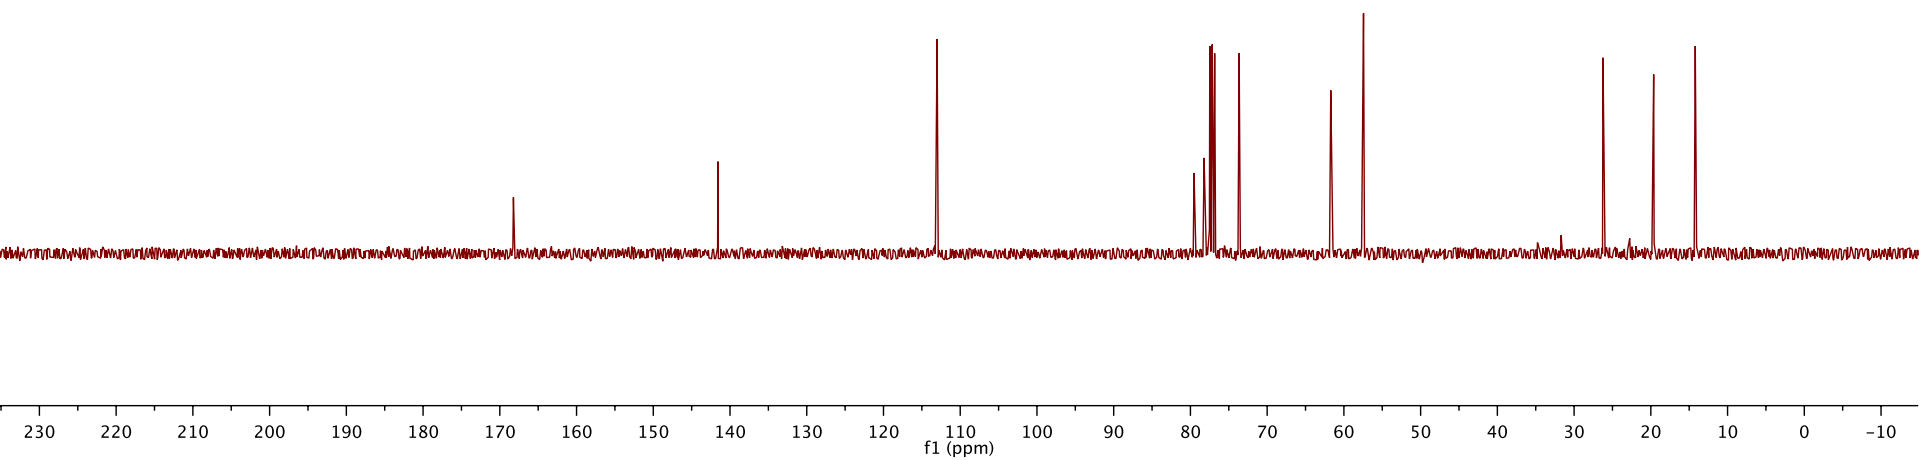

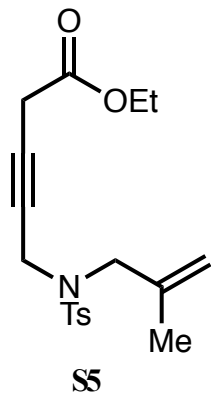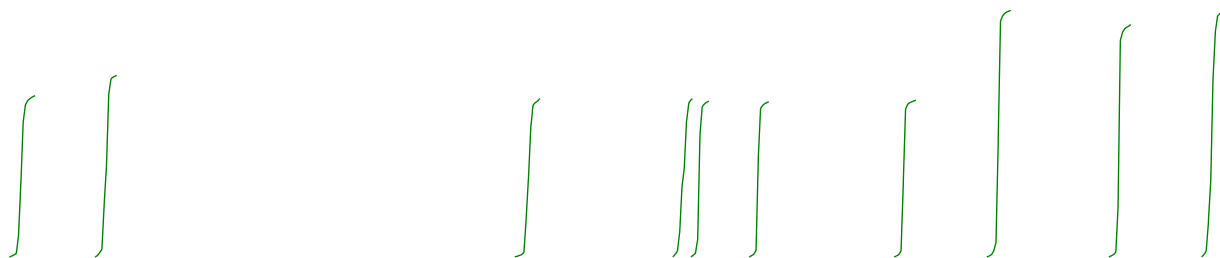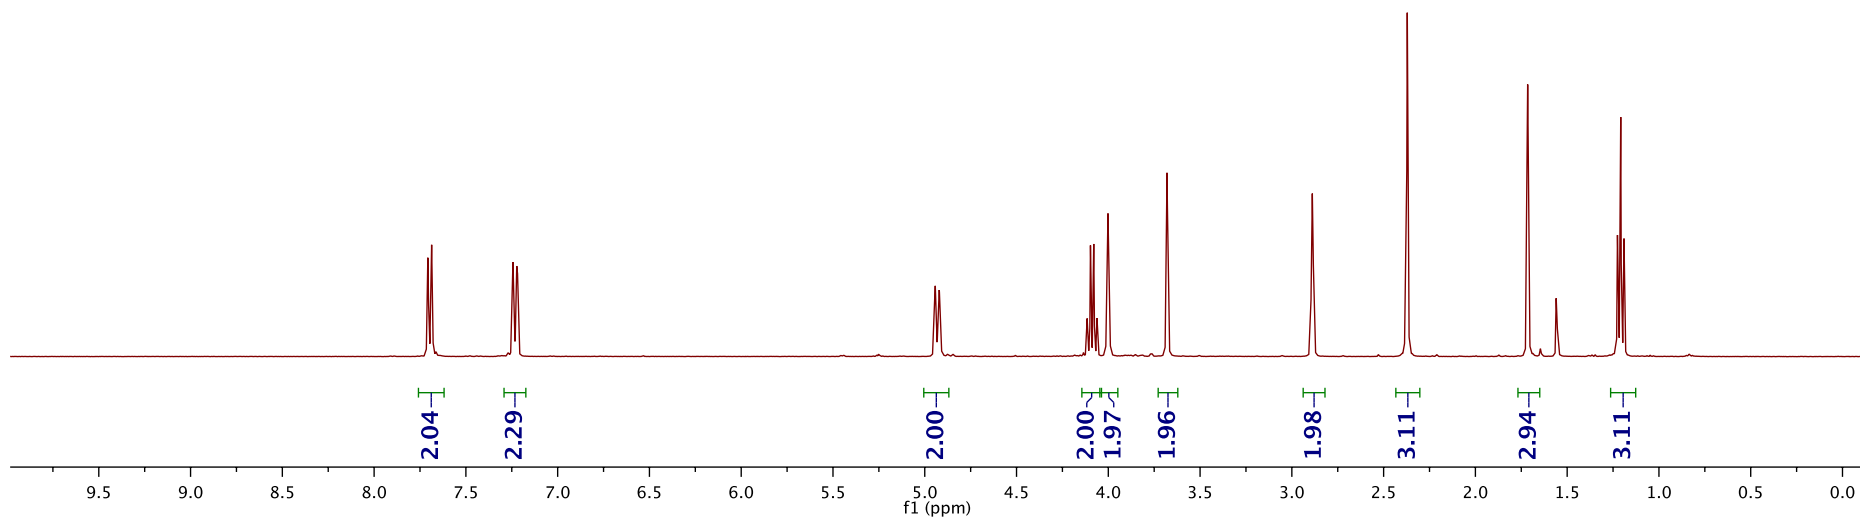

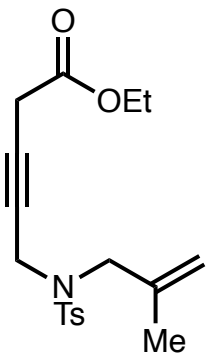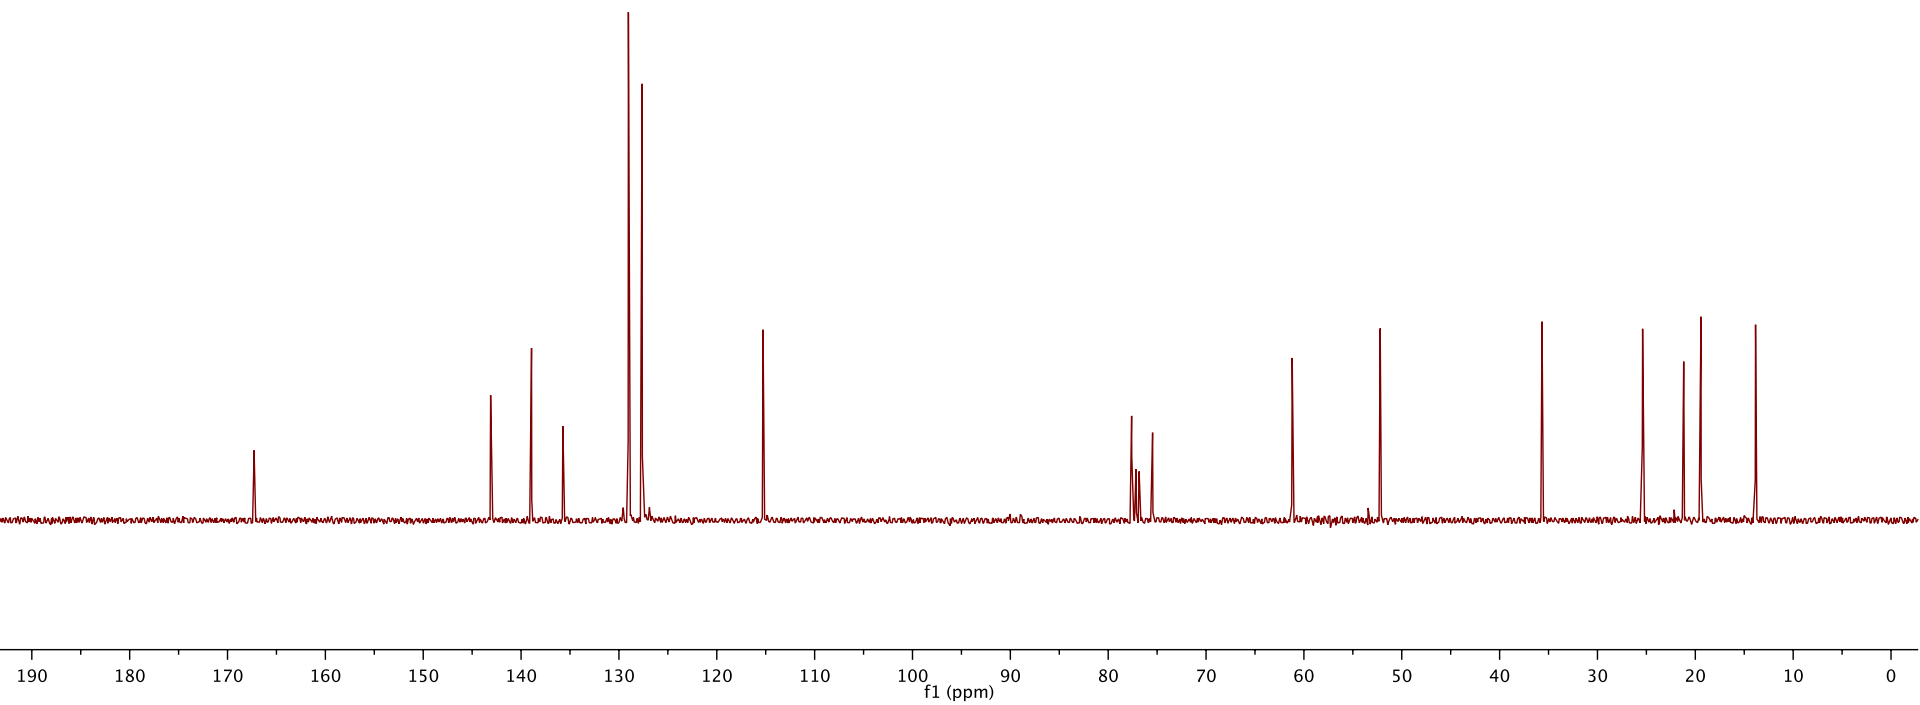



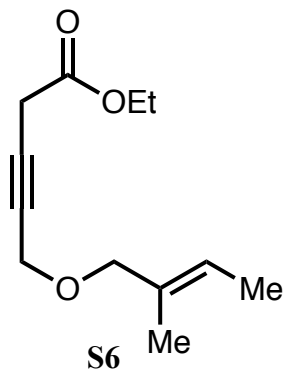

5.55  
5.54  
5.54  
5.53  
5.52  
5.51

4.22  
4.21  
4.20  
4.19  
4.18  
4.17  
4.16  
4.15  
4.14  
4.13  
4.10  
4.09  
4.08  
3.92

3.32  
3.31  
3.31  
3.31  
3.30

1.65  
1.65  
1.64  
1.63  
1.62  
1.61  
1.30  
1.29  
1.28  
1.27  
1.27  
1.26  
1.26

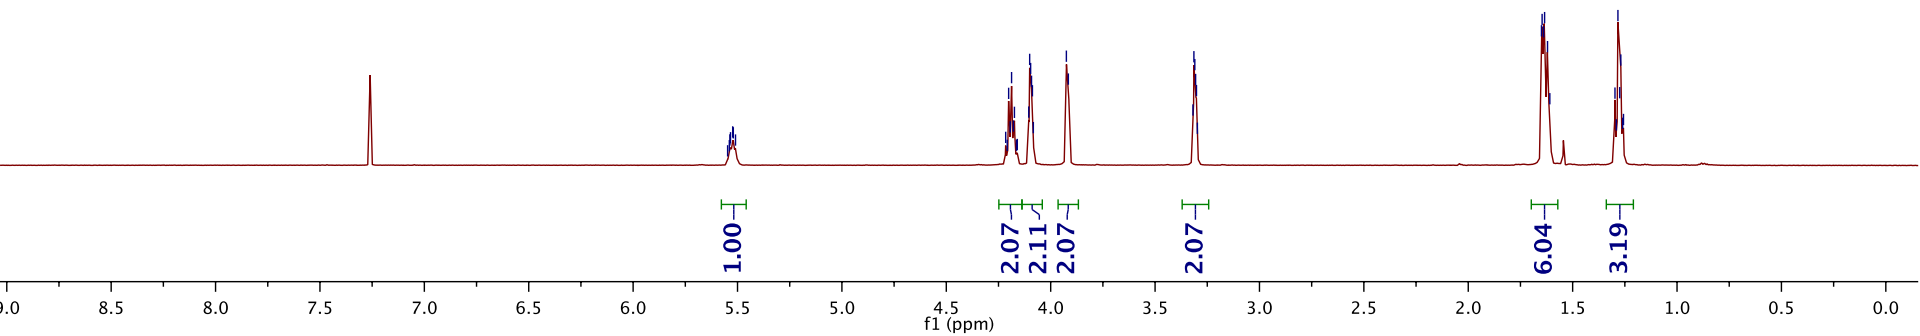

f1 (ppm)

1

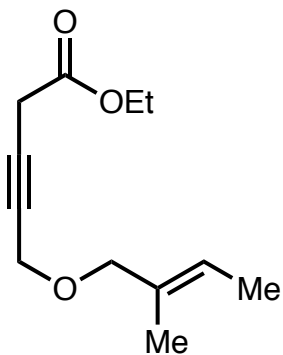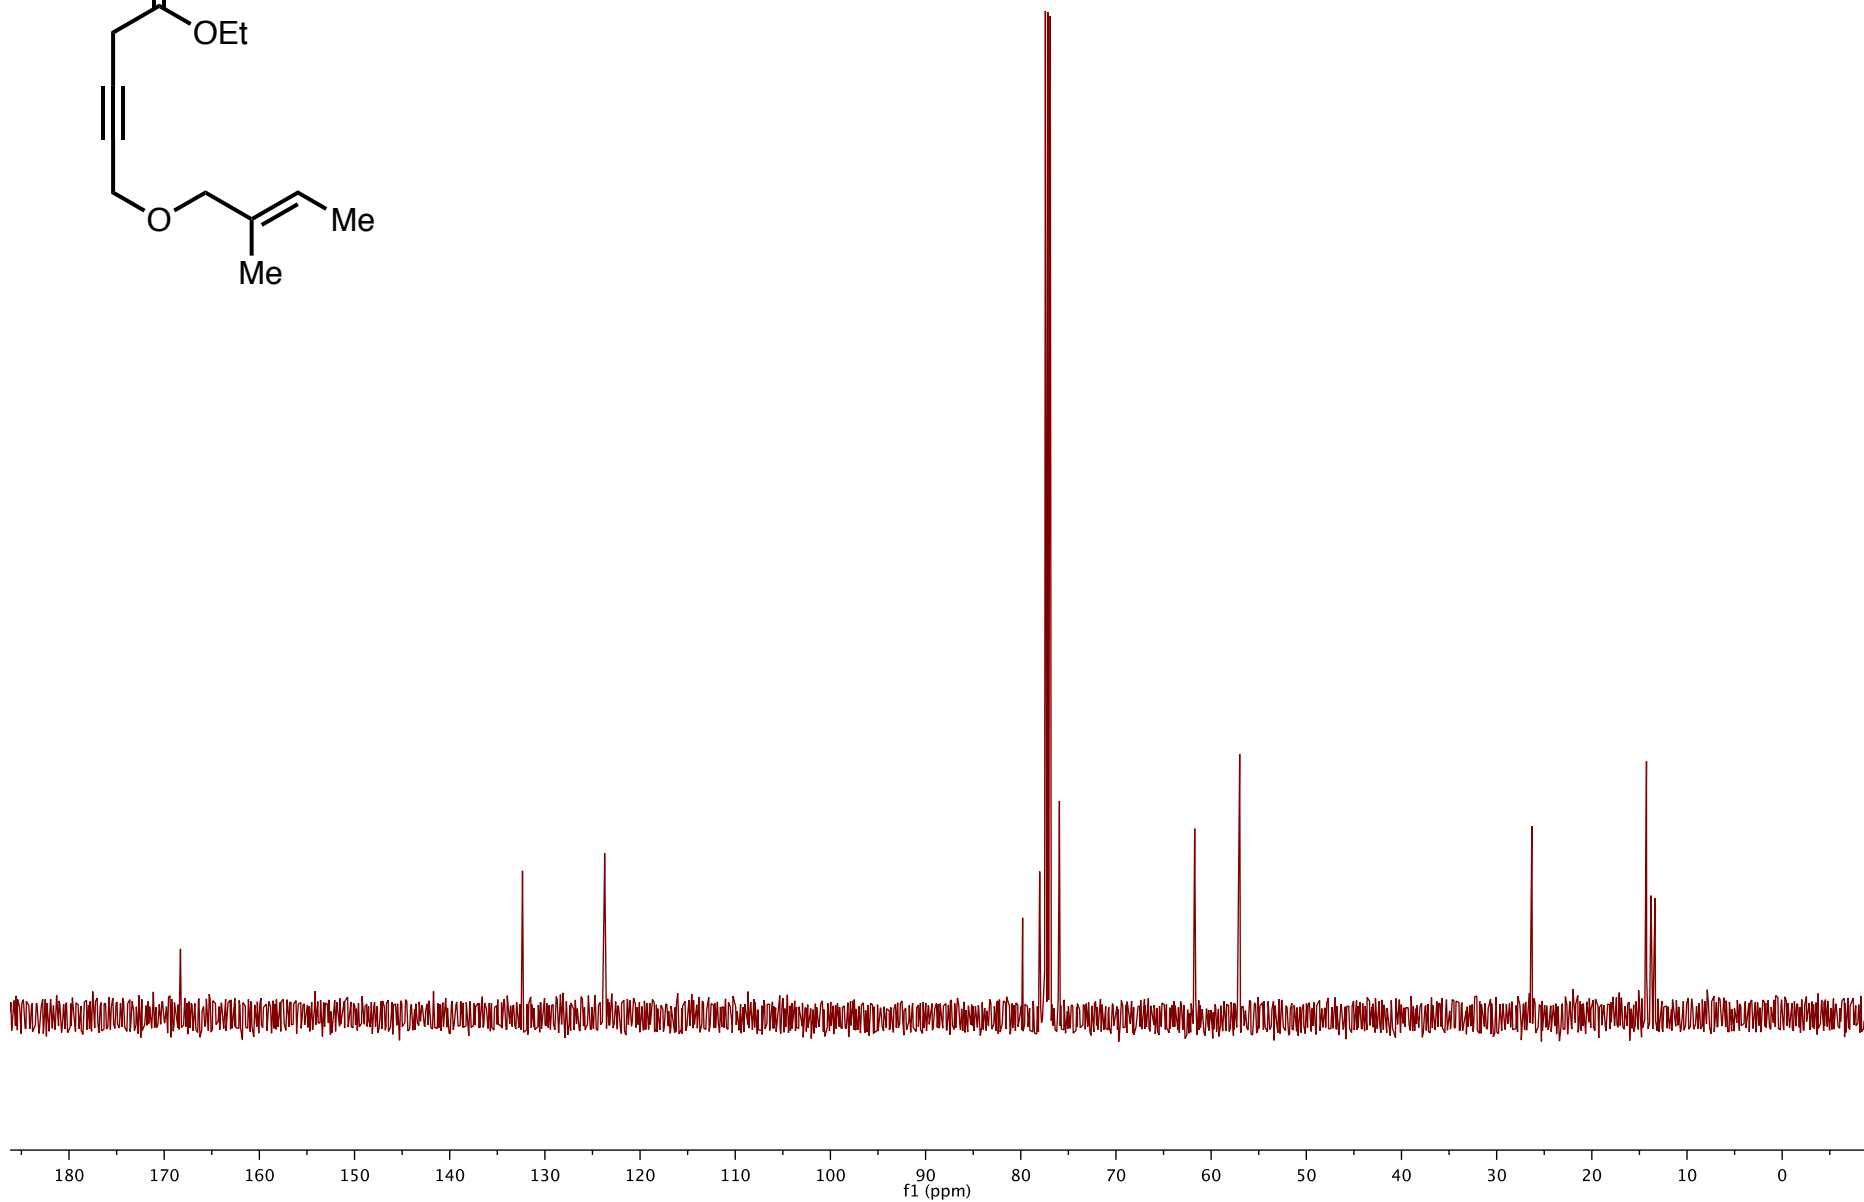

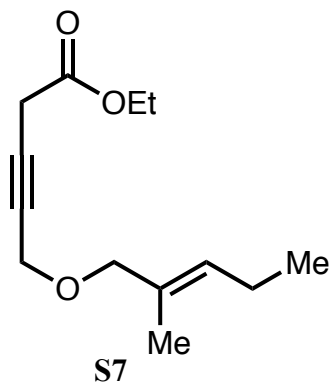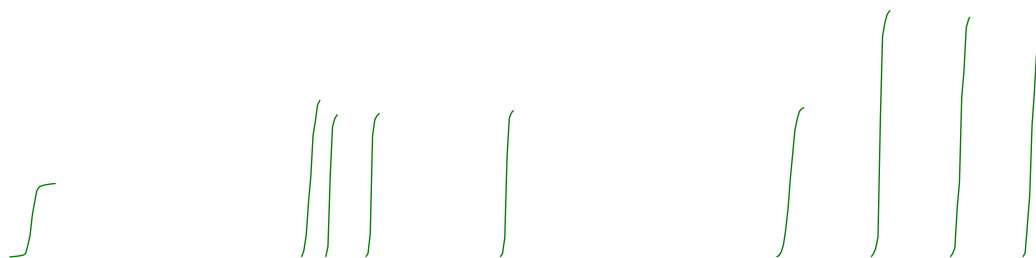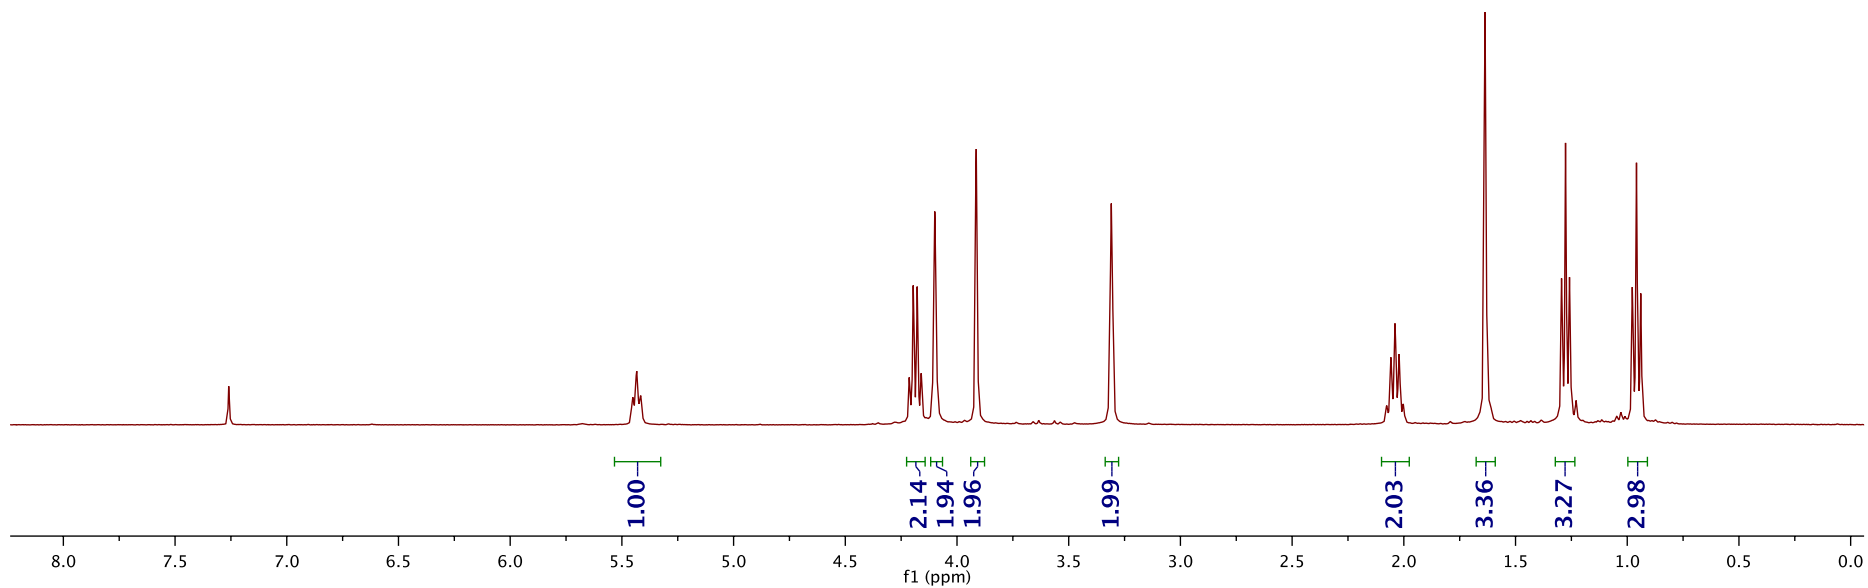

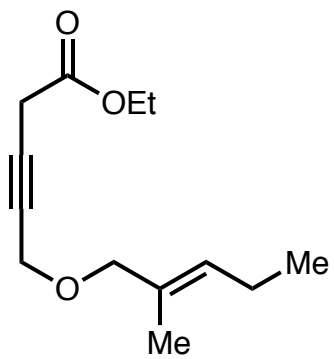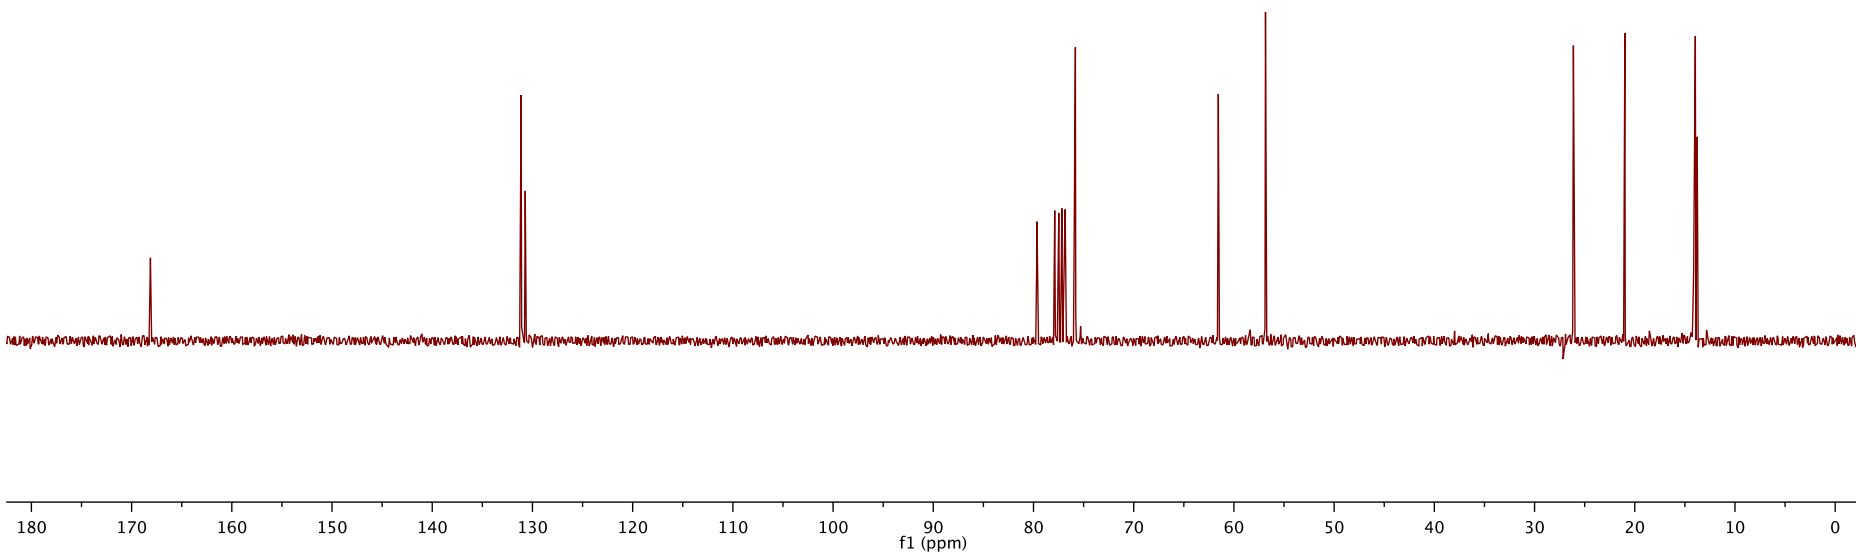

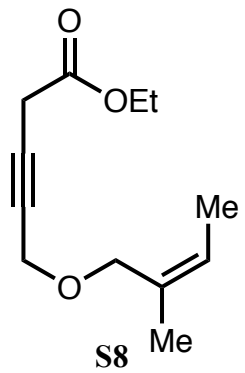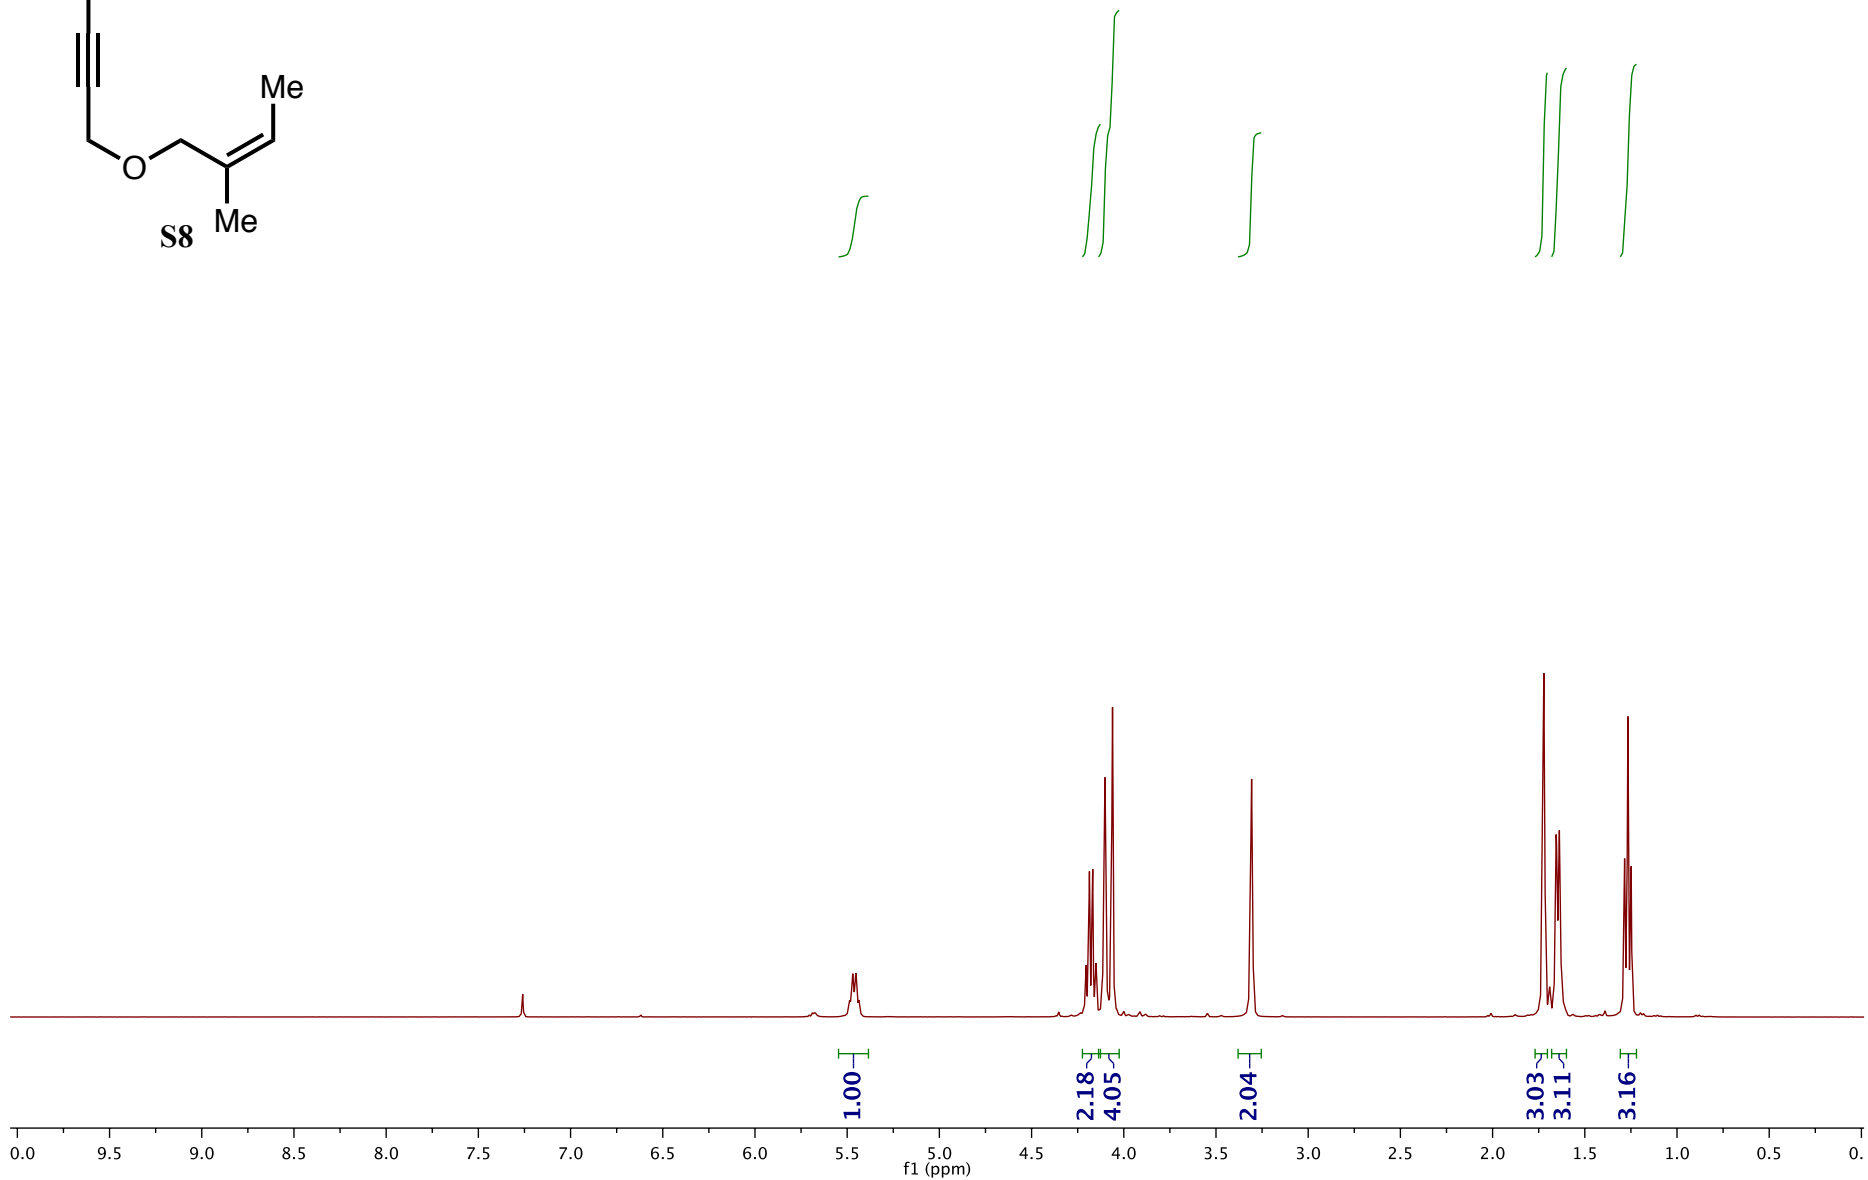

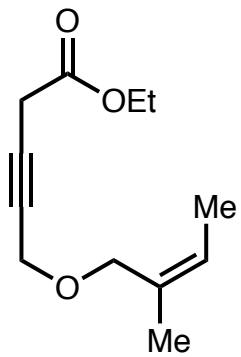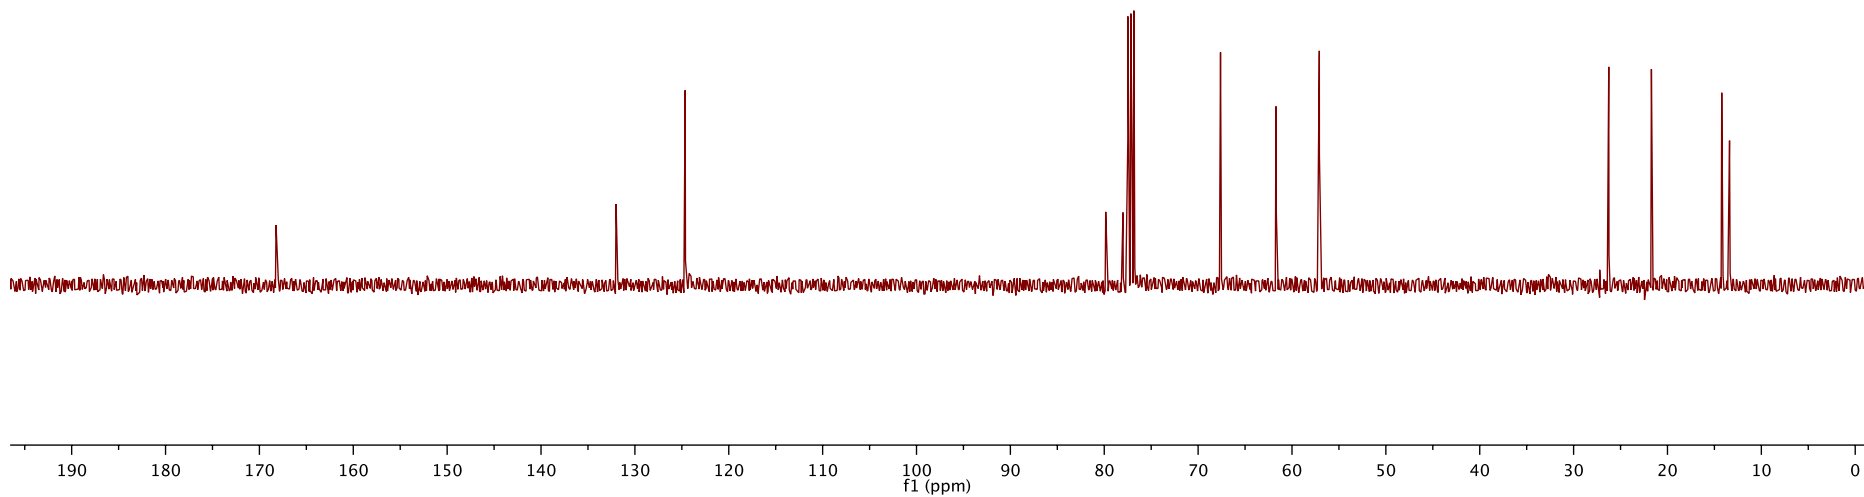

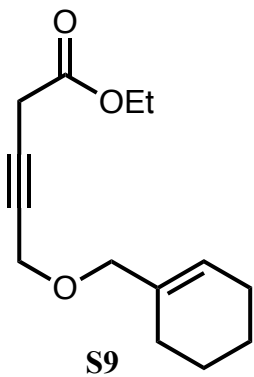

S9

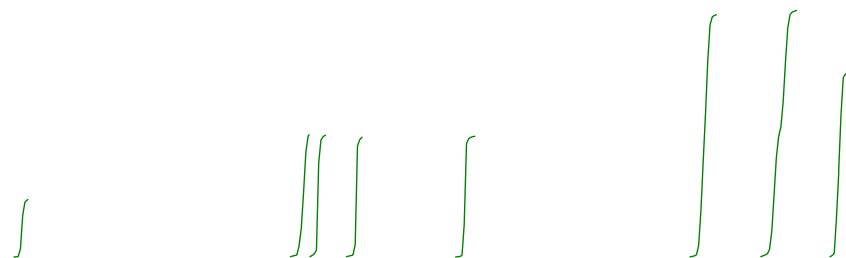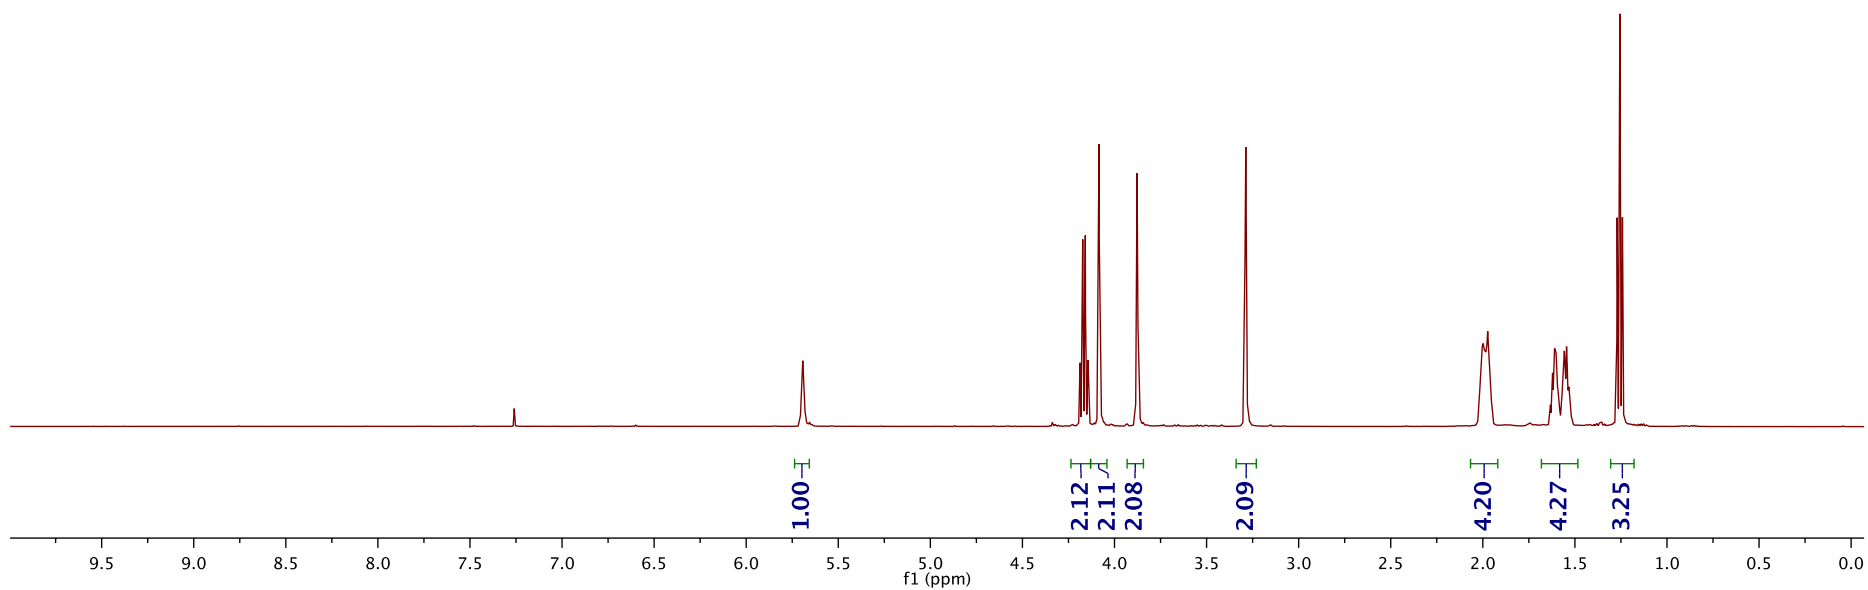

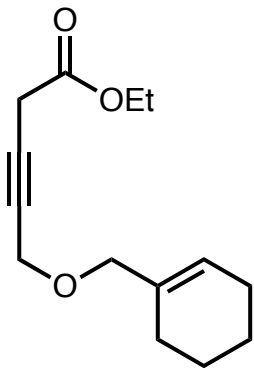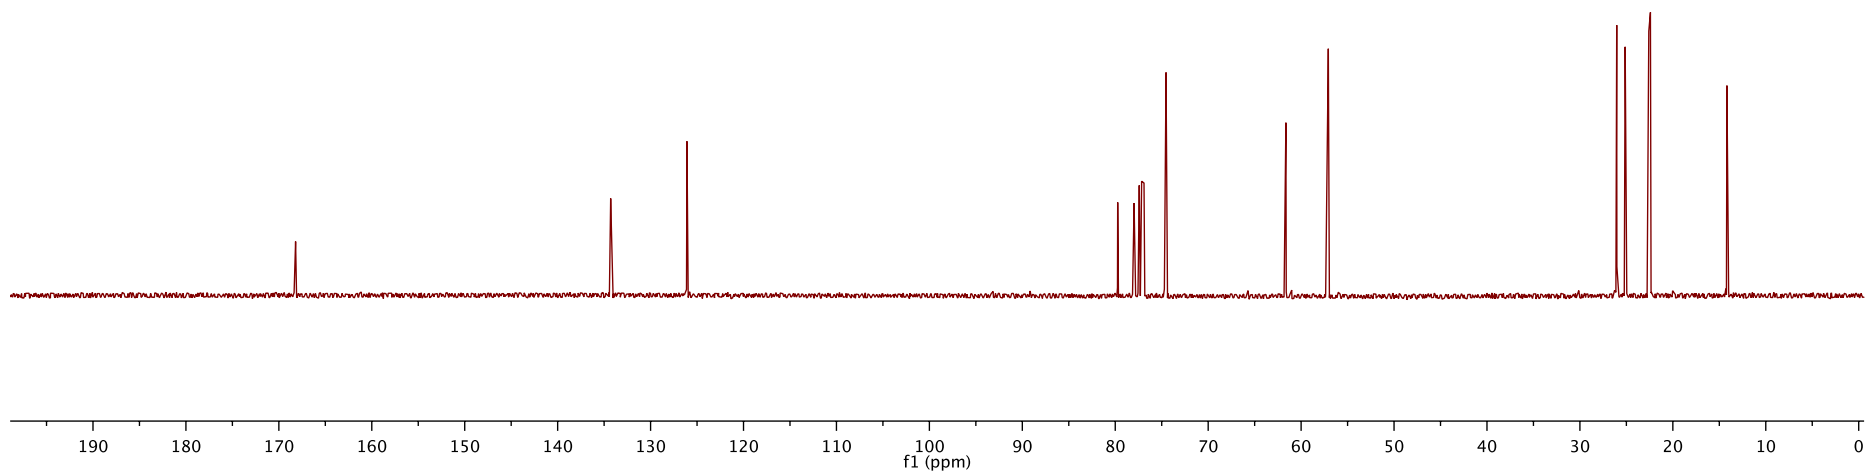



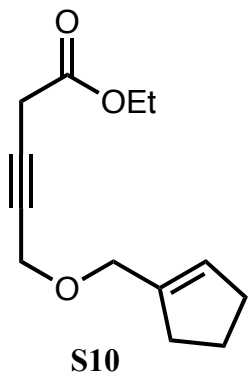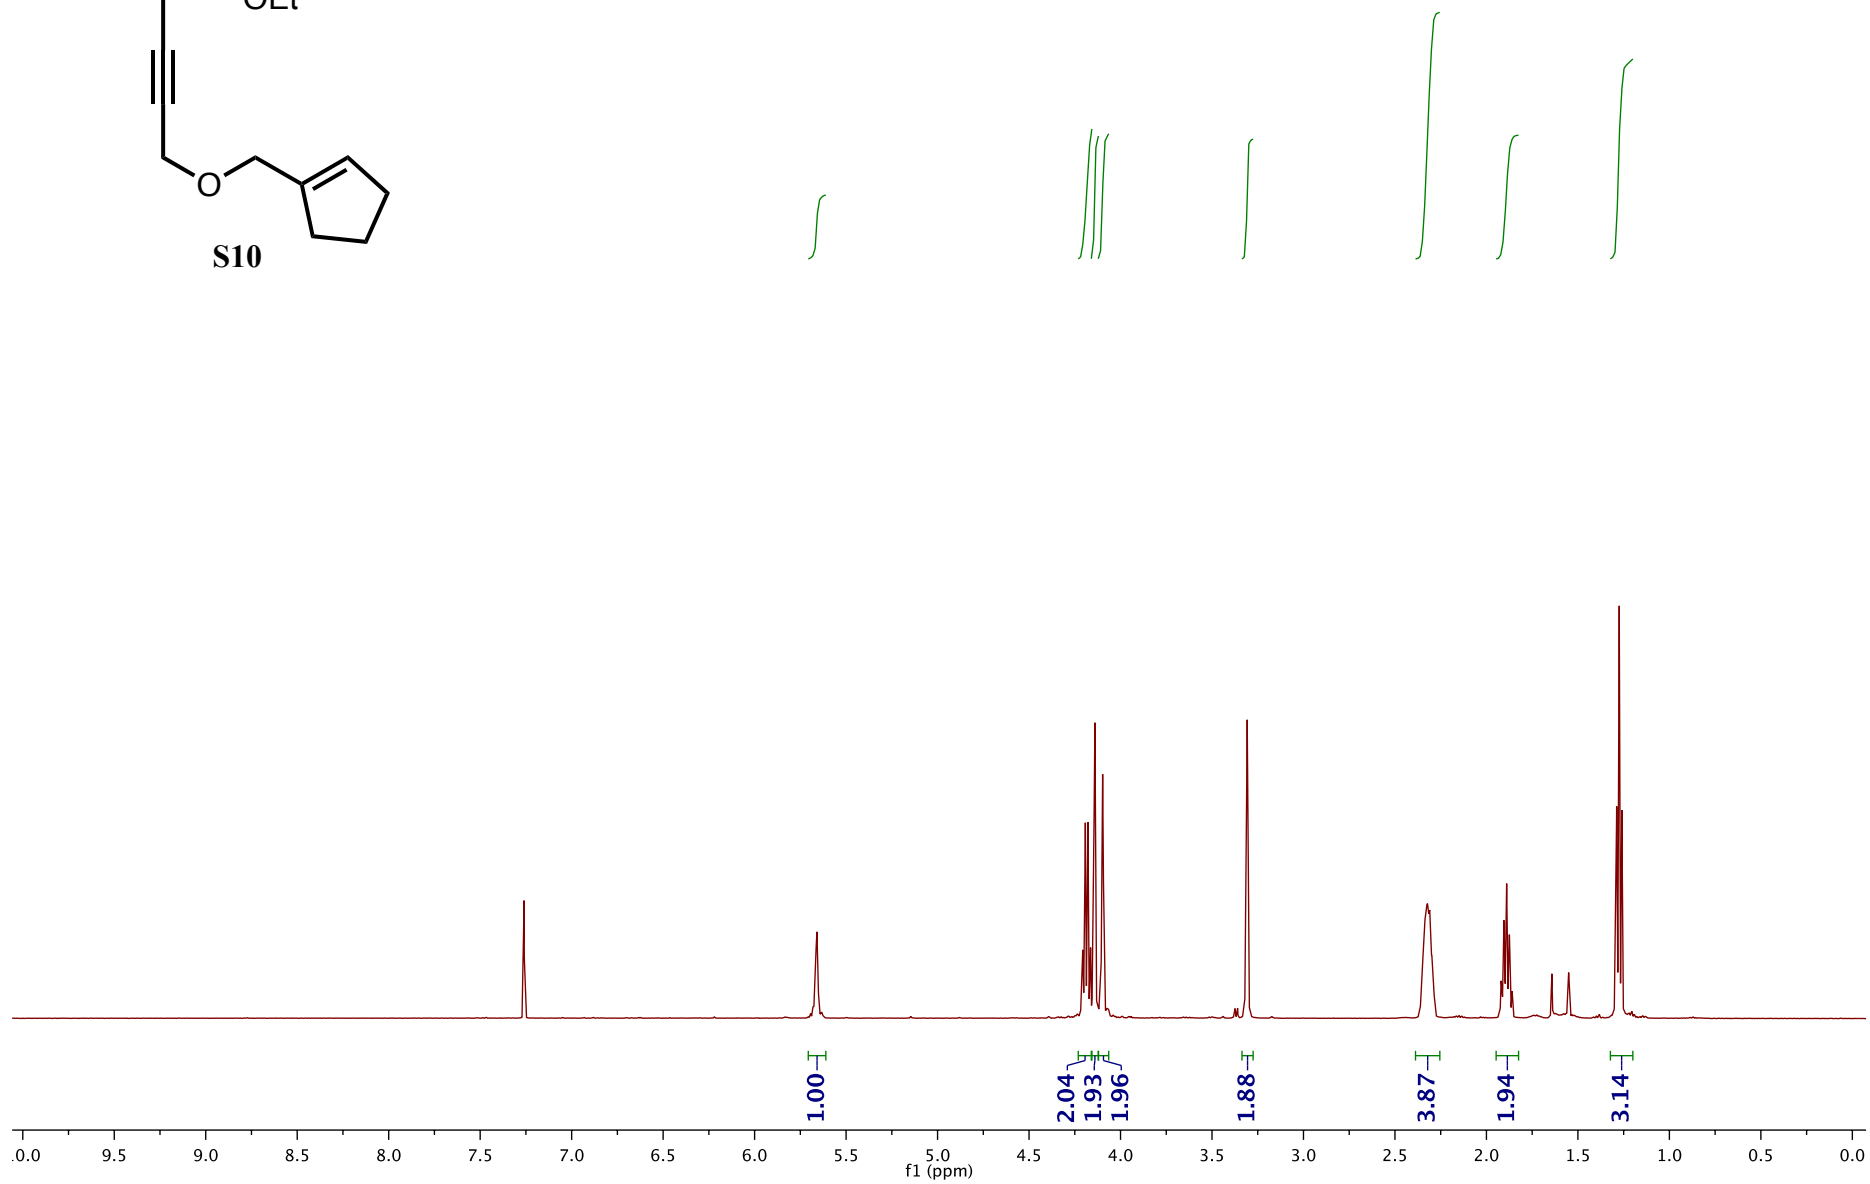

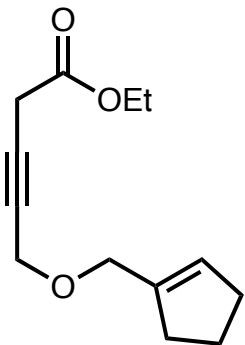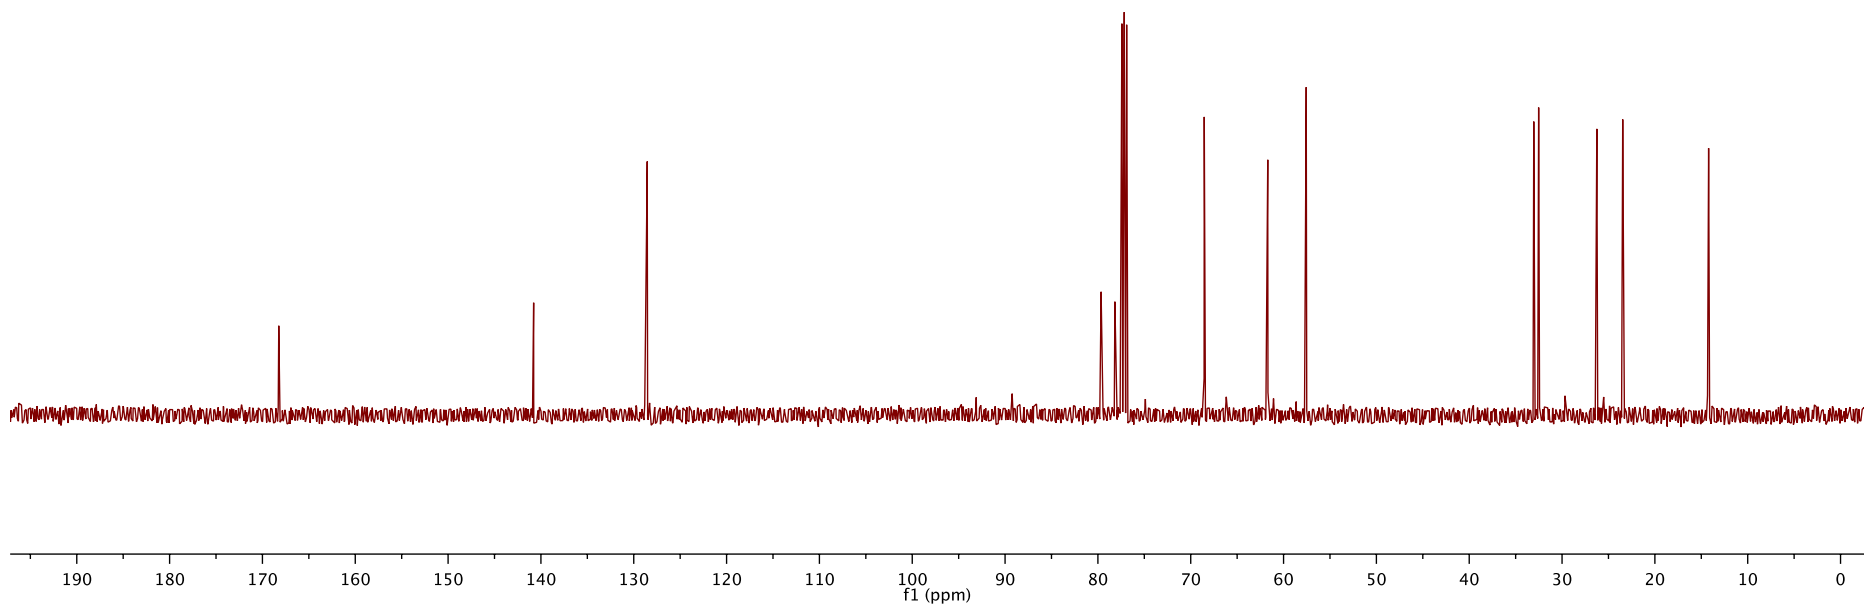

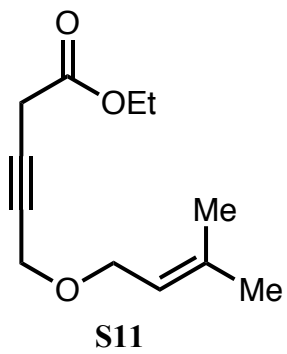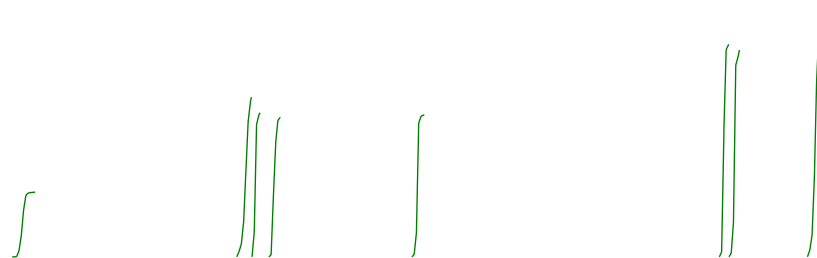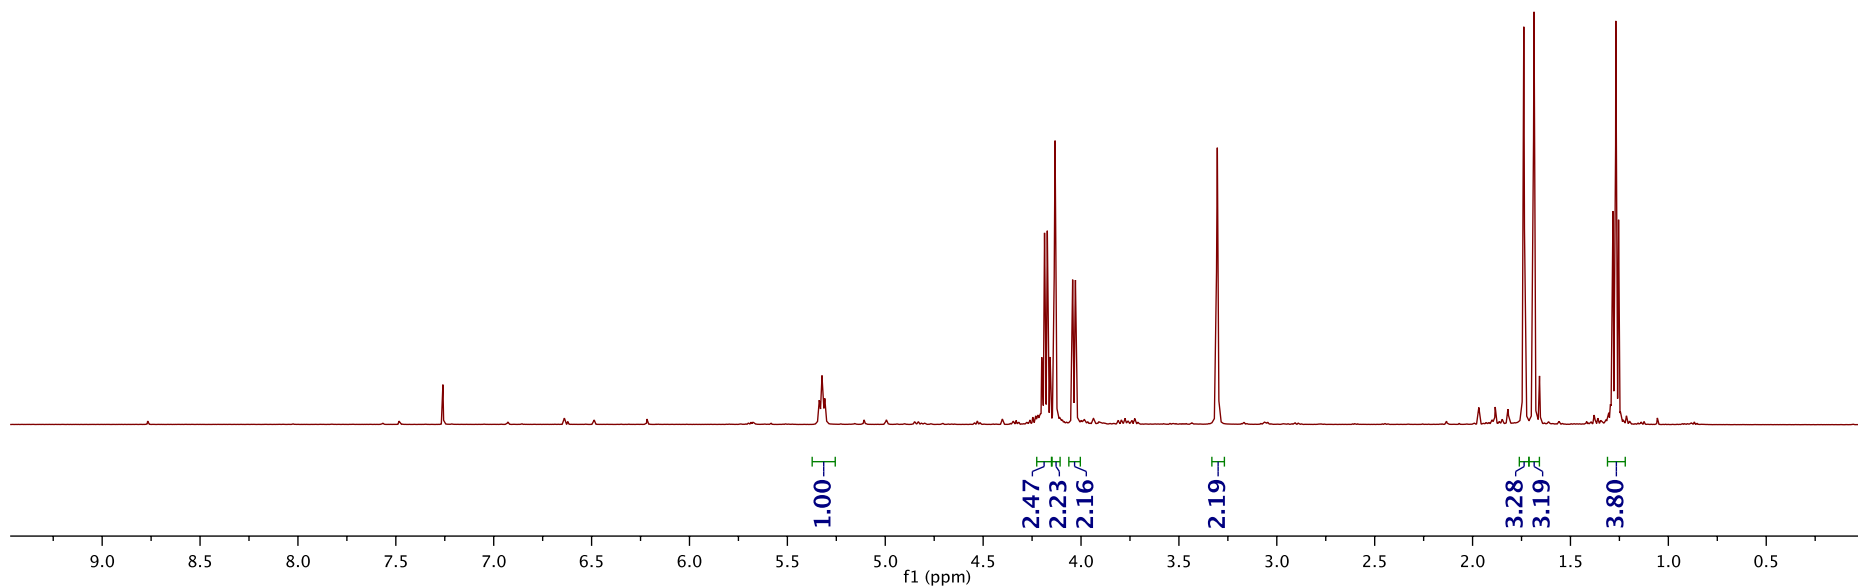

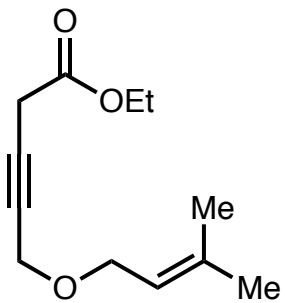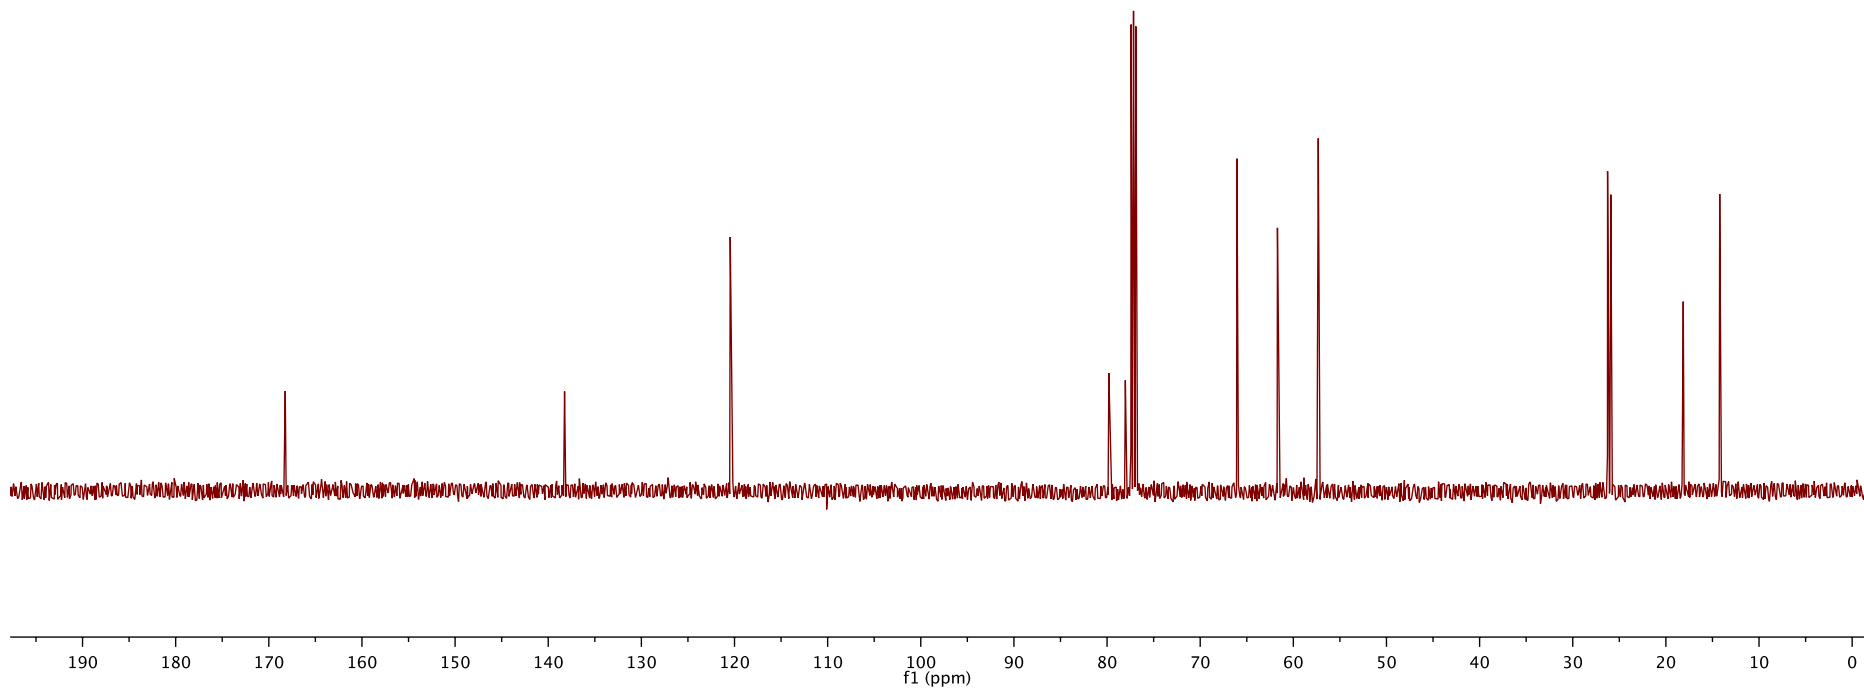

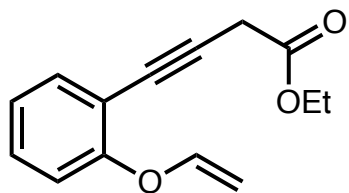

26

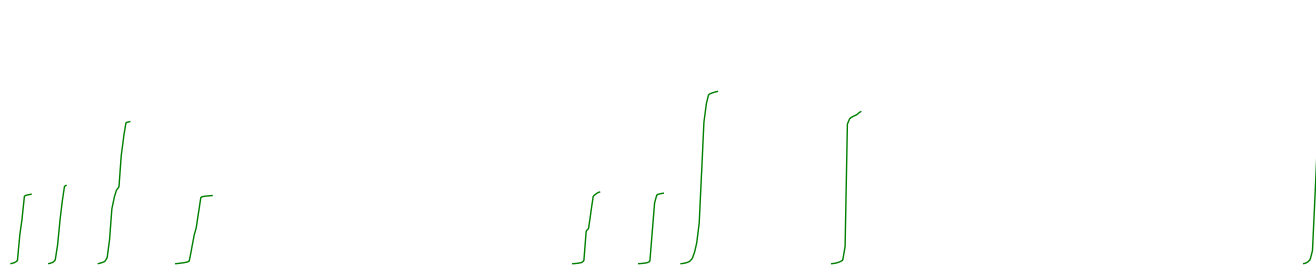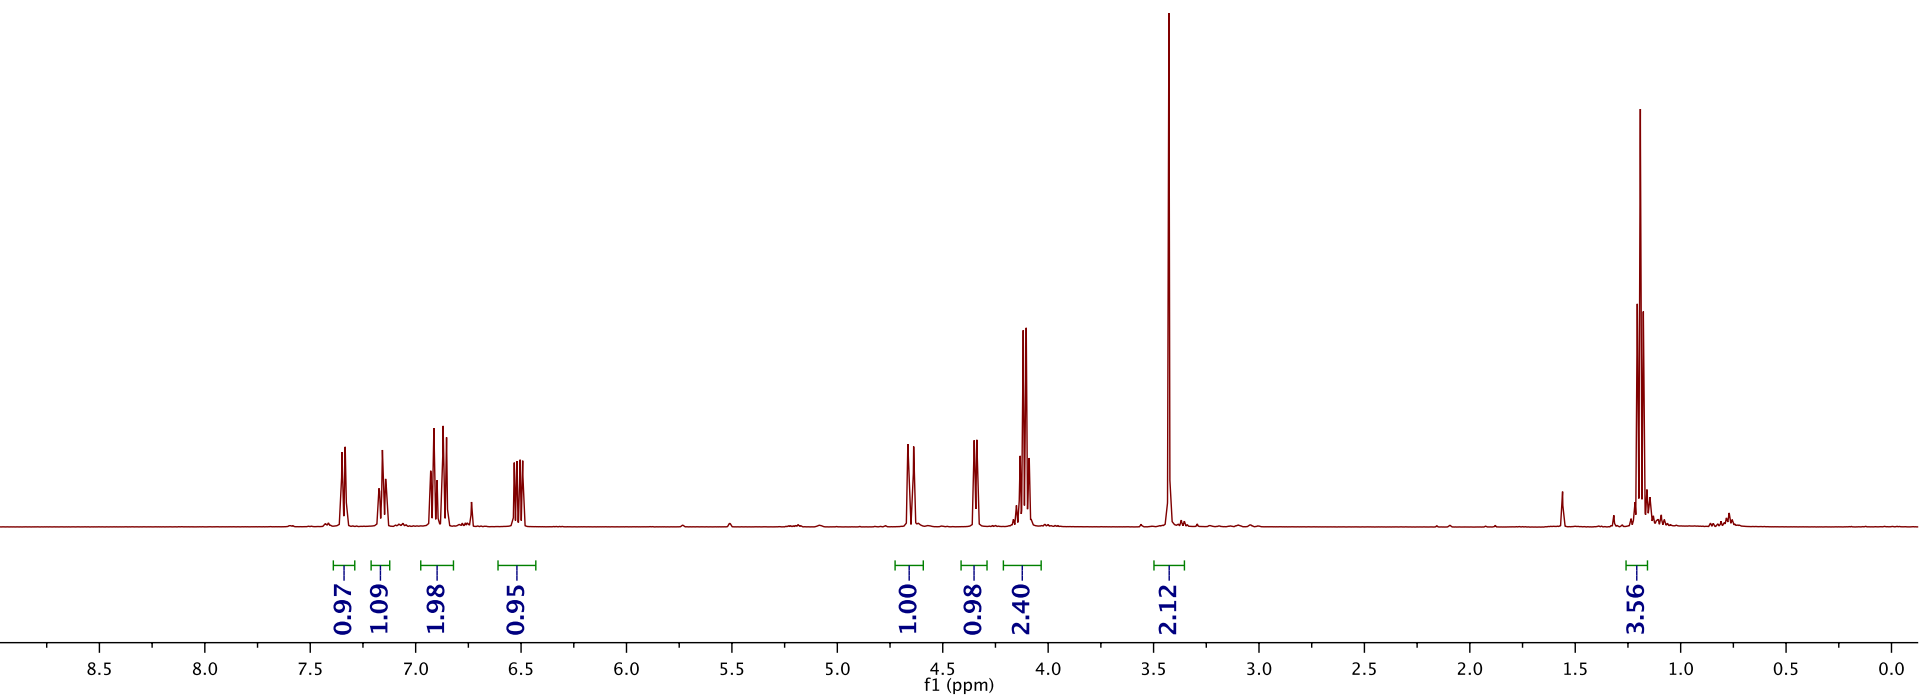

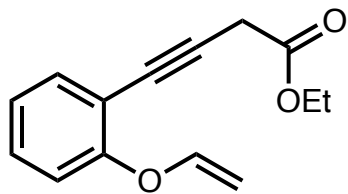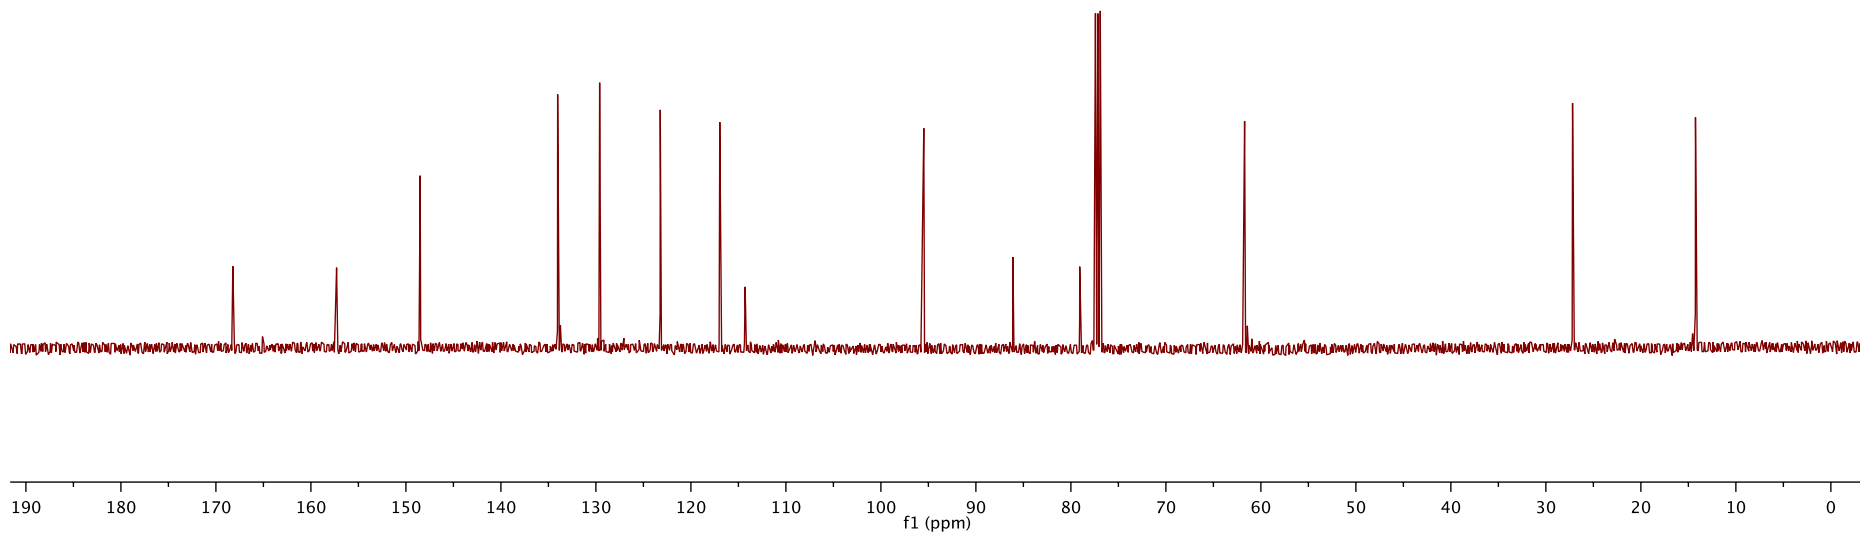

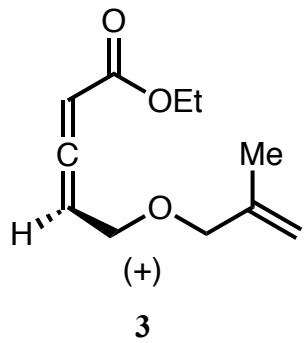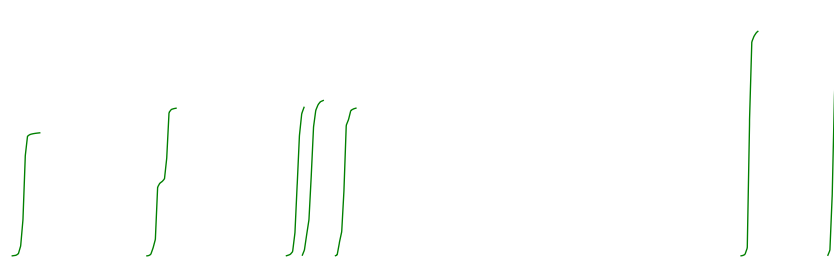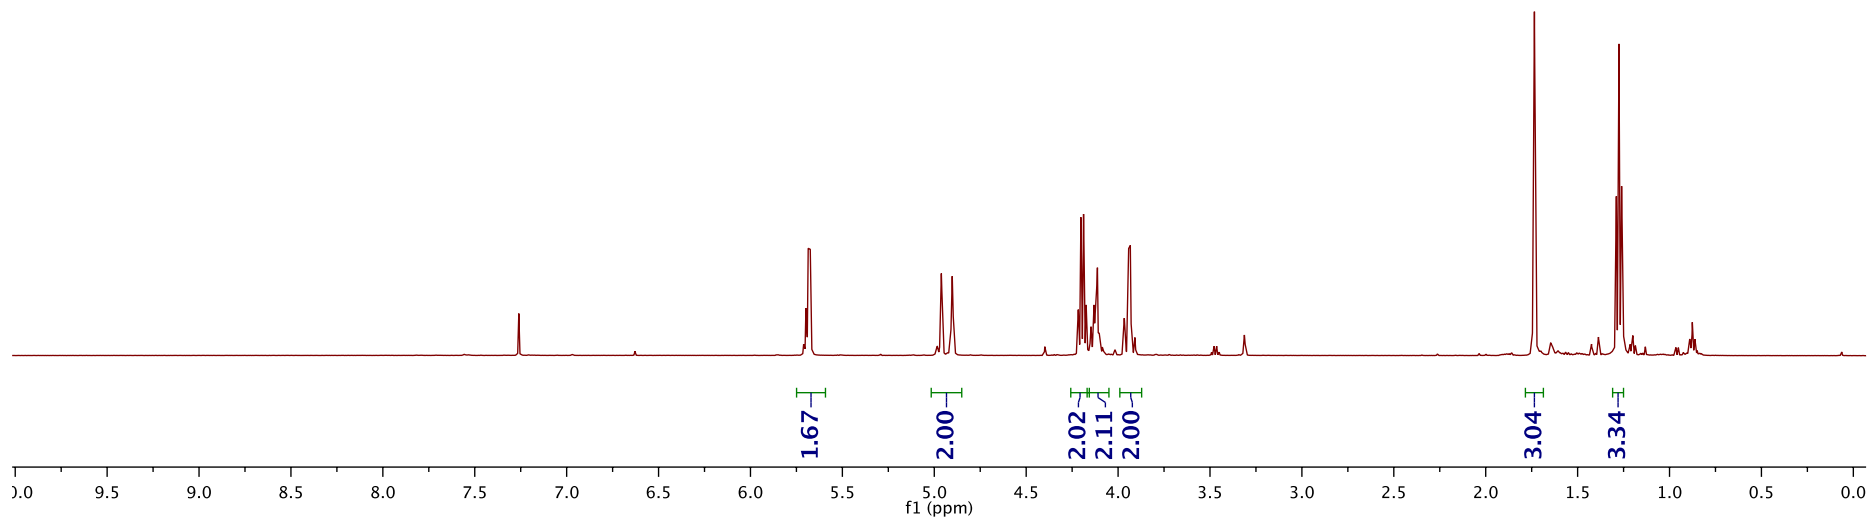

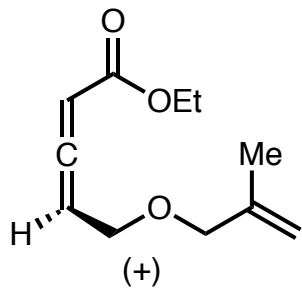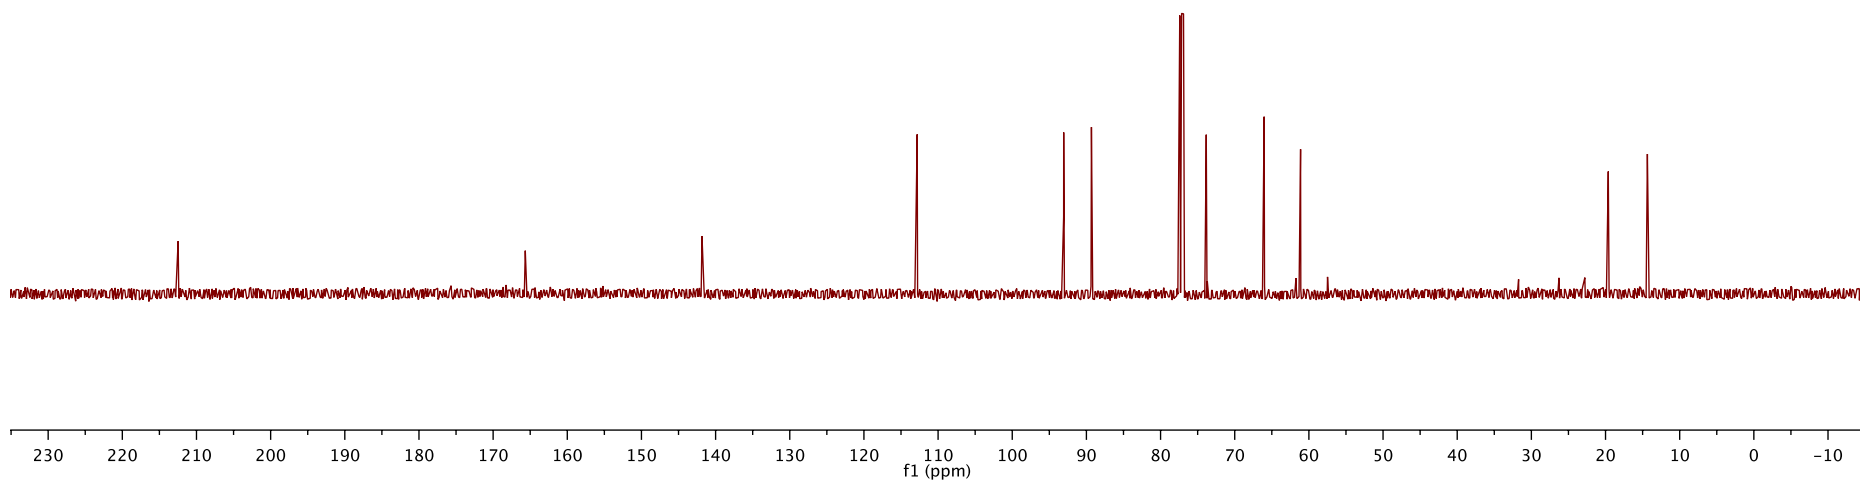



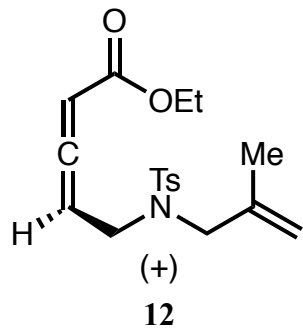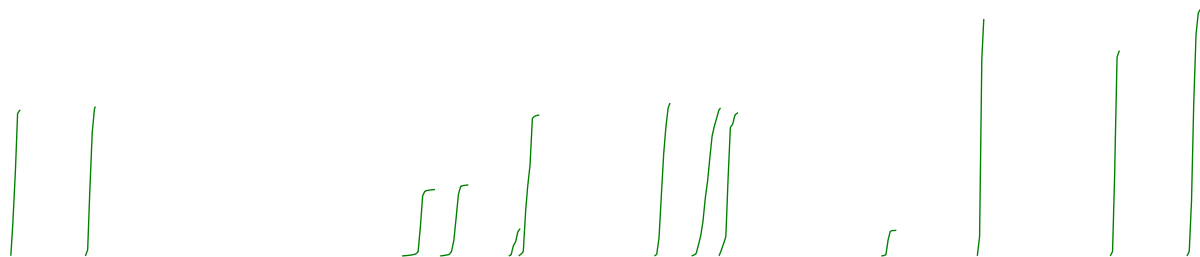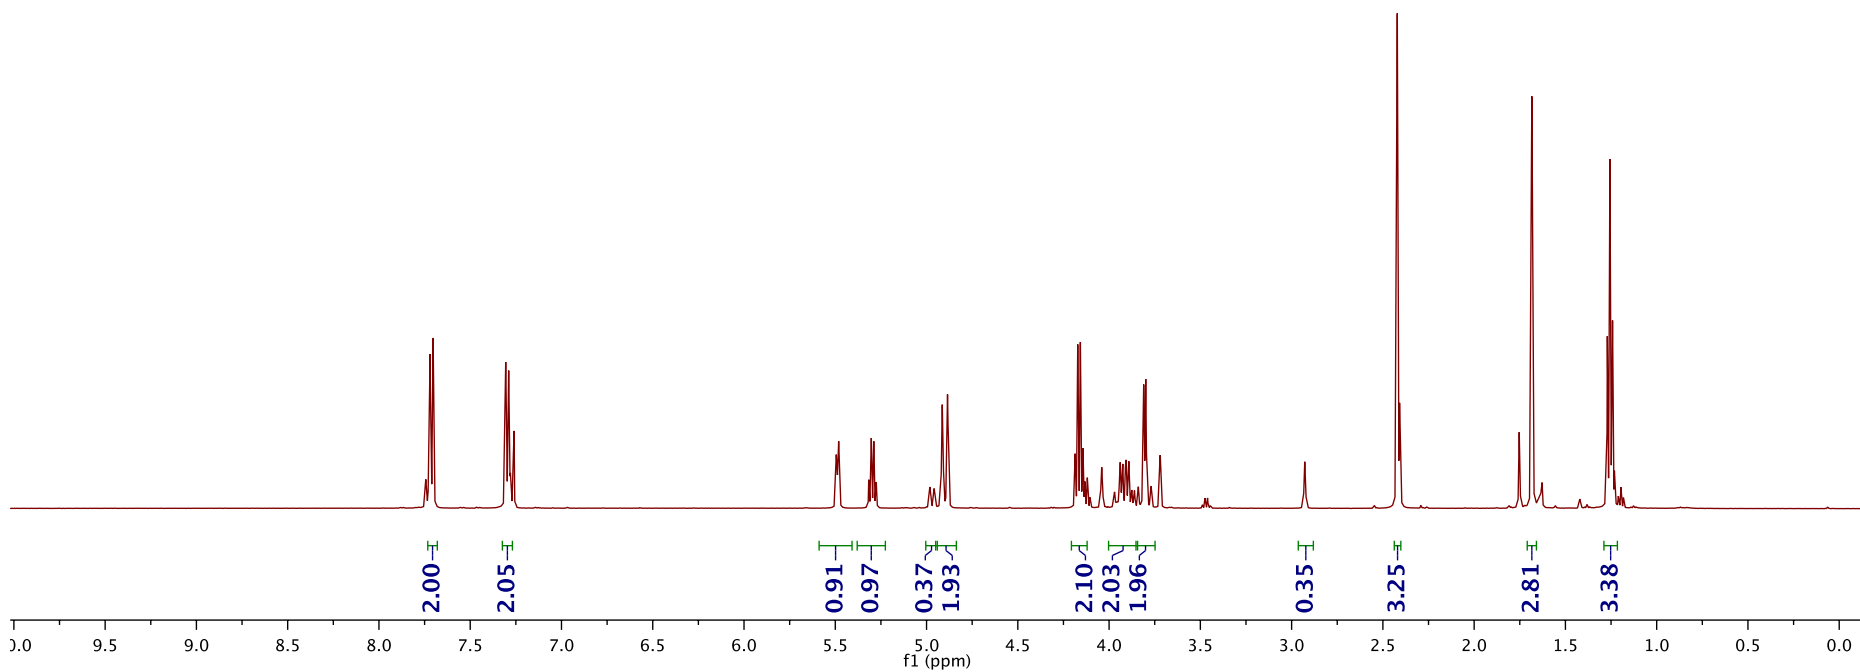

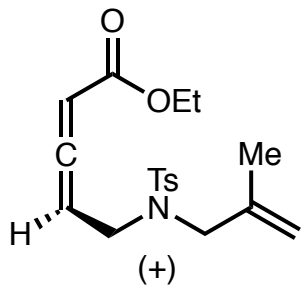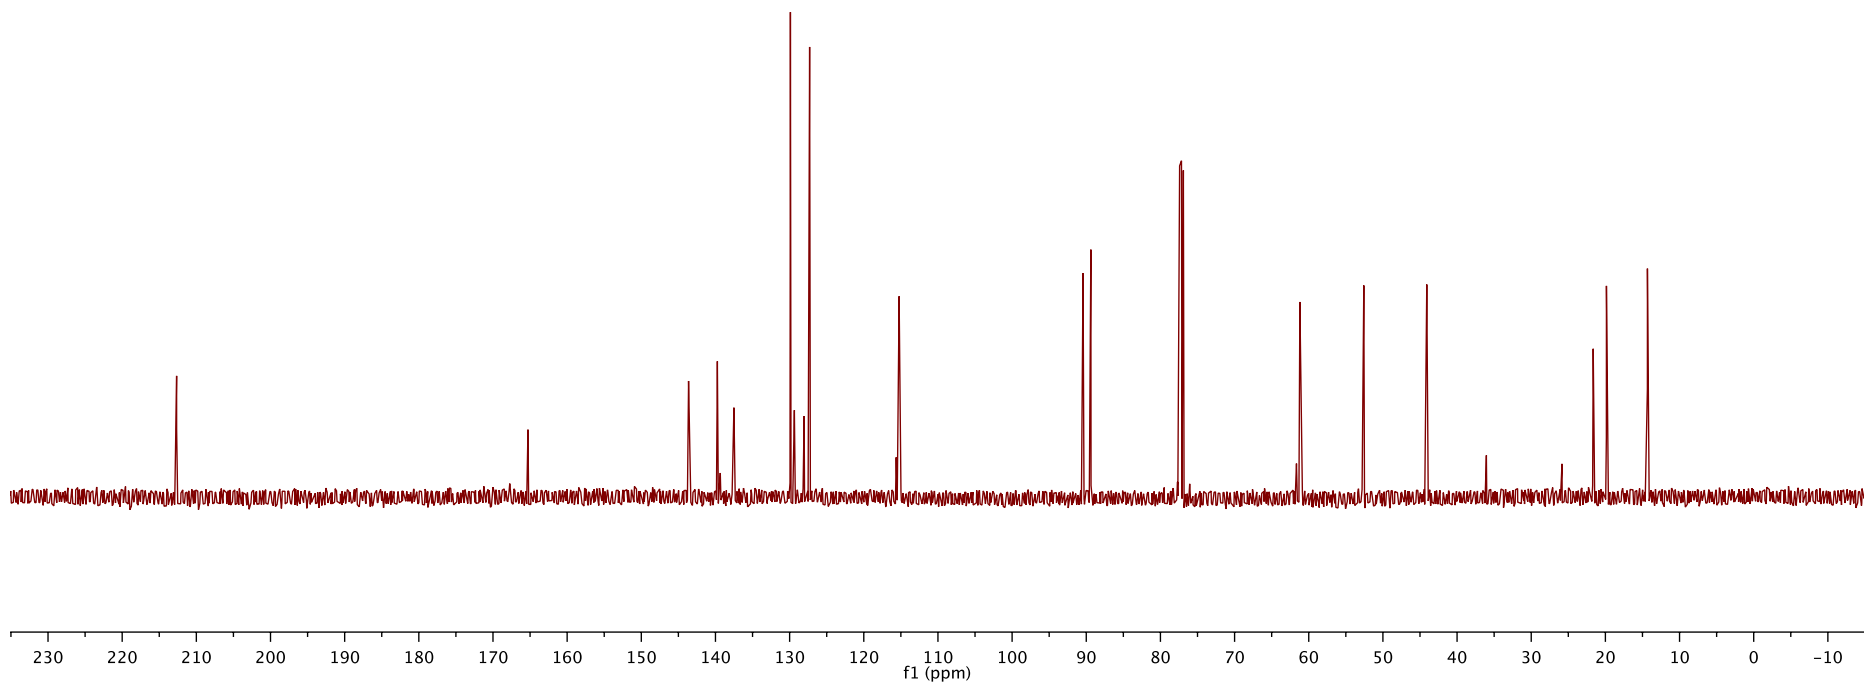

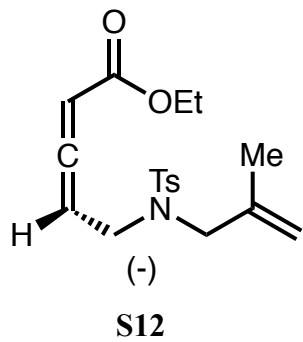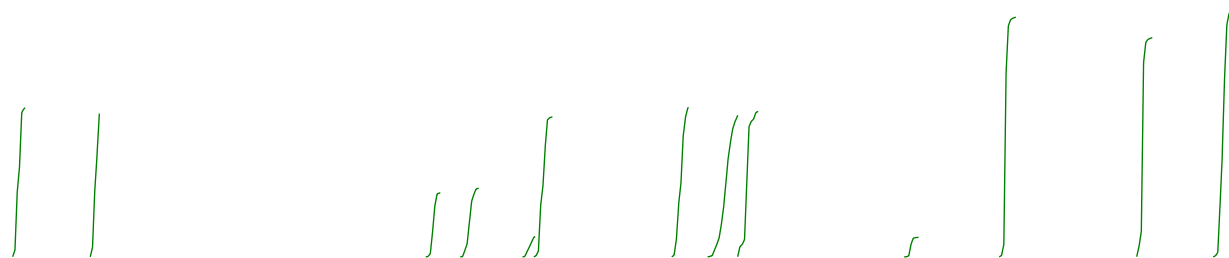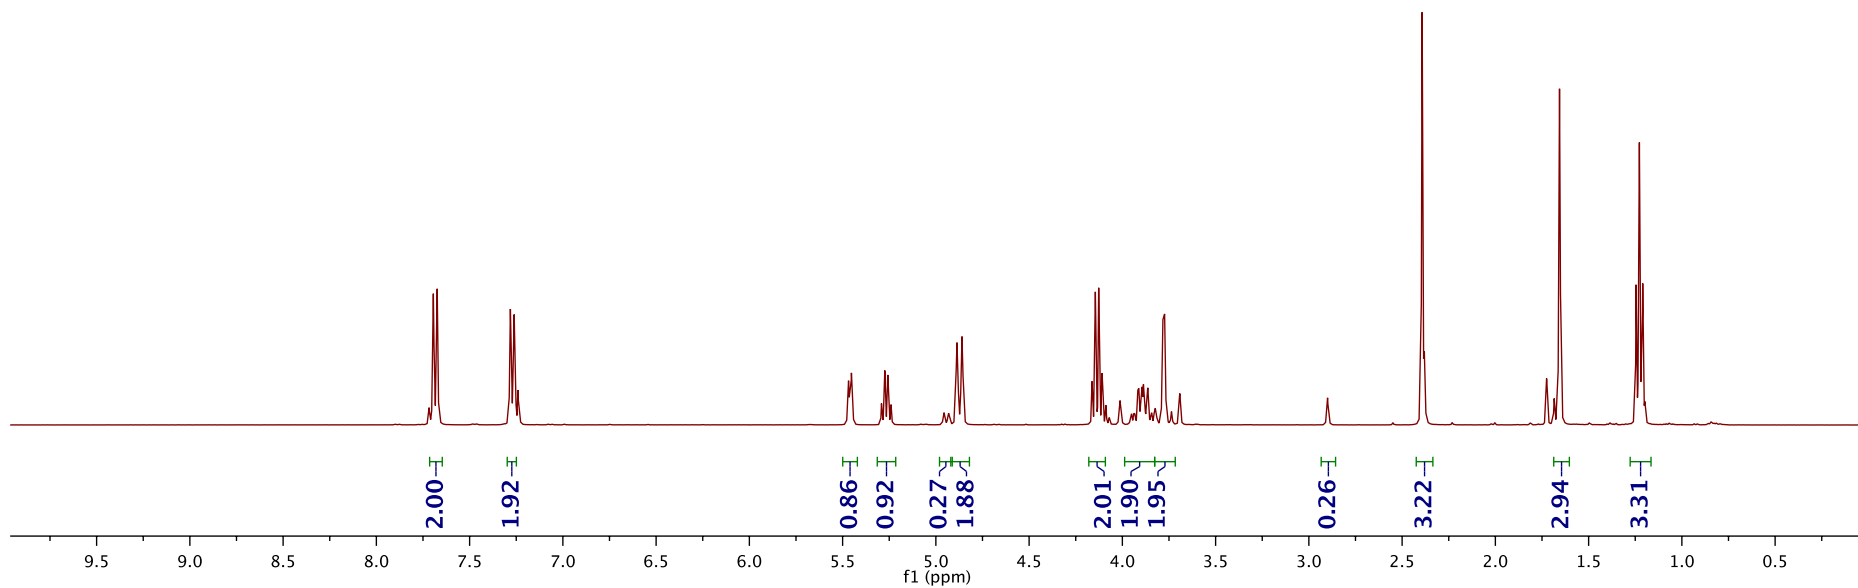

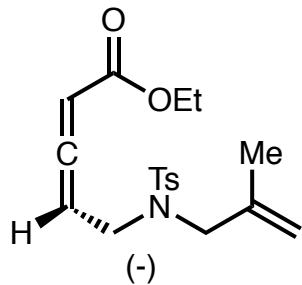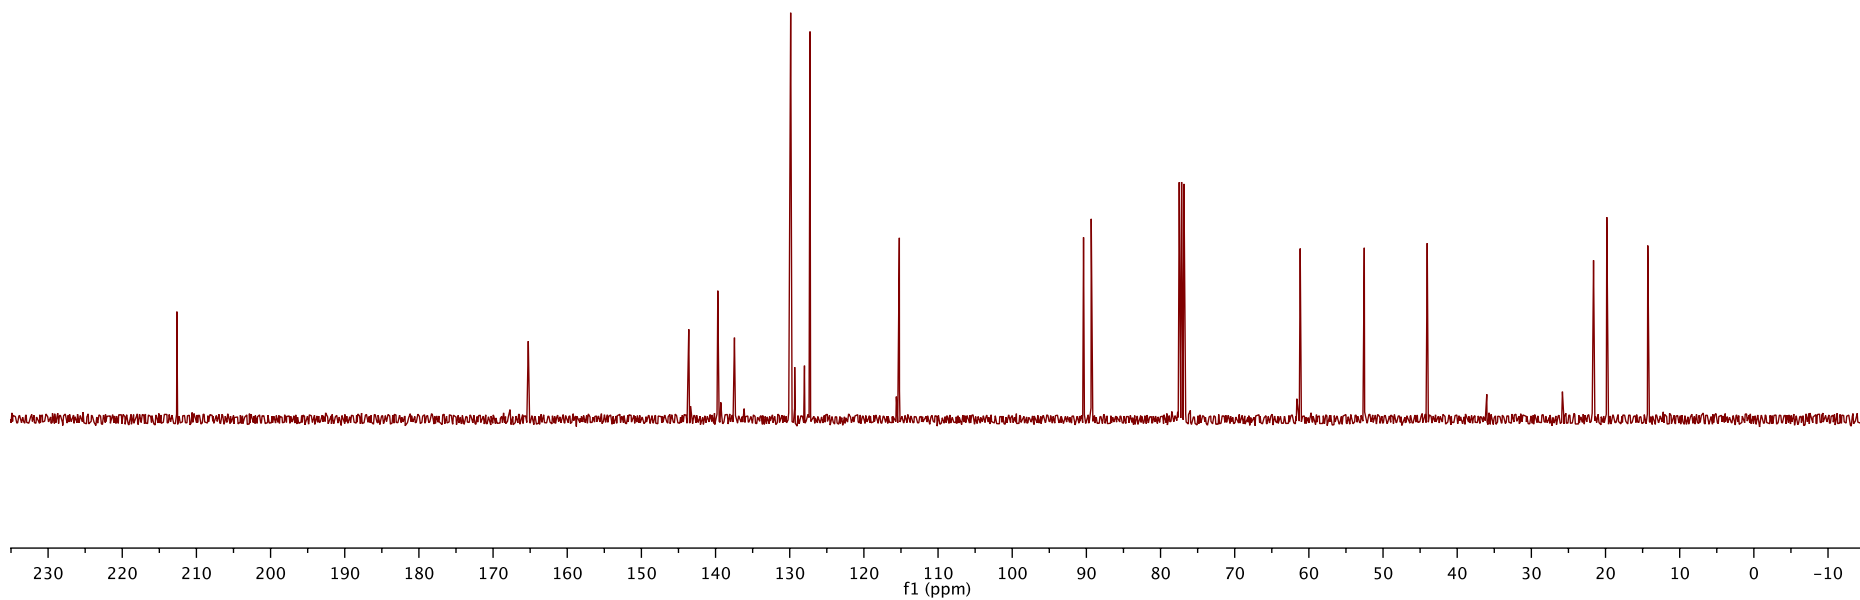

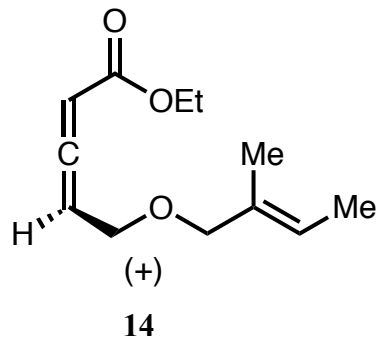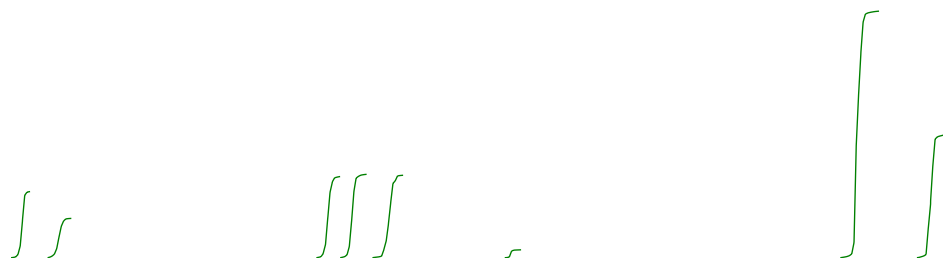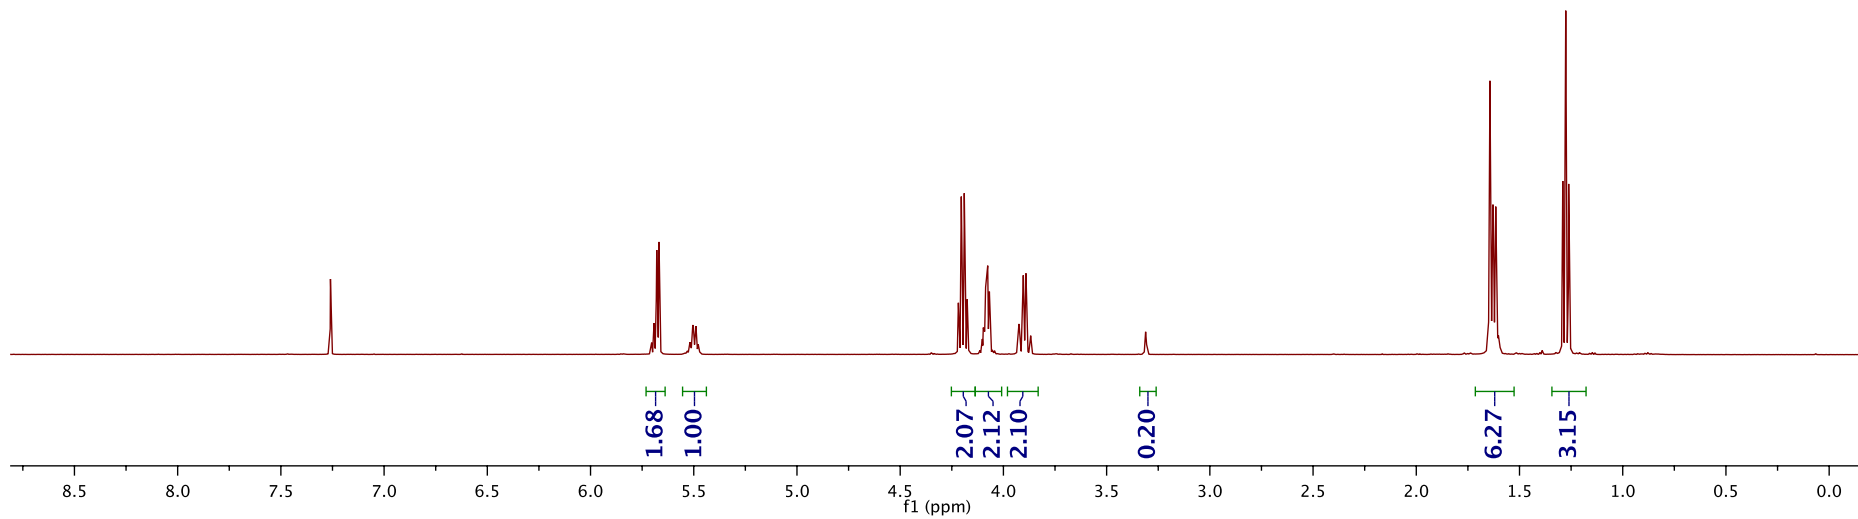

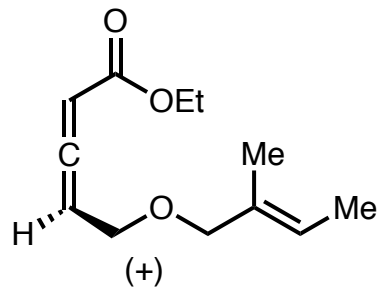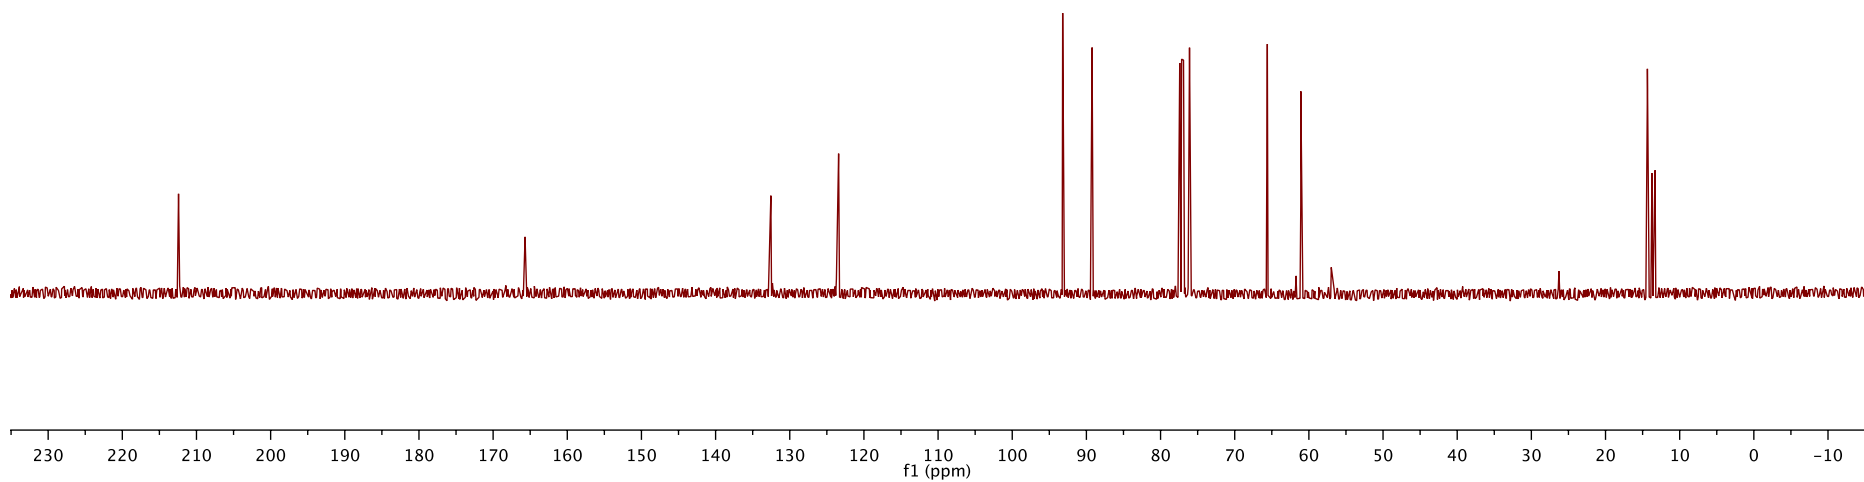

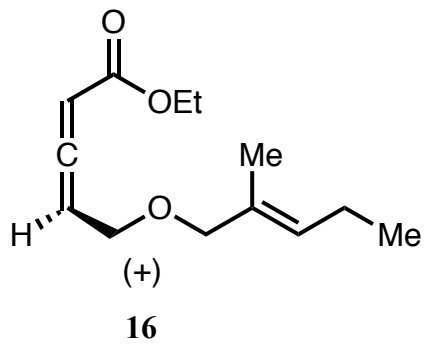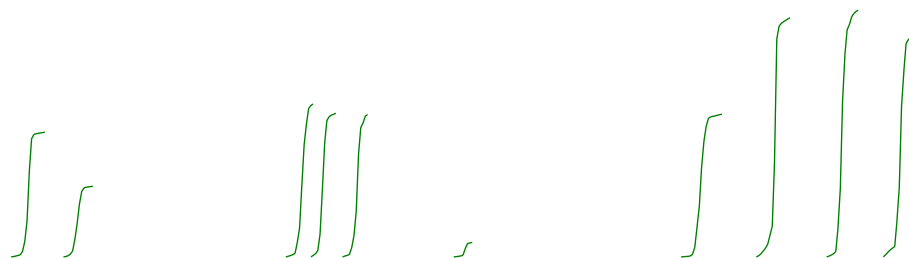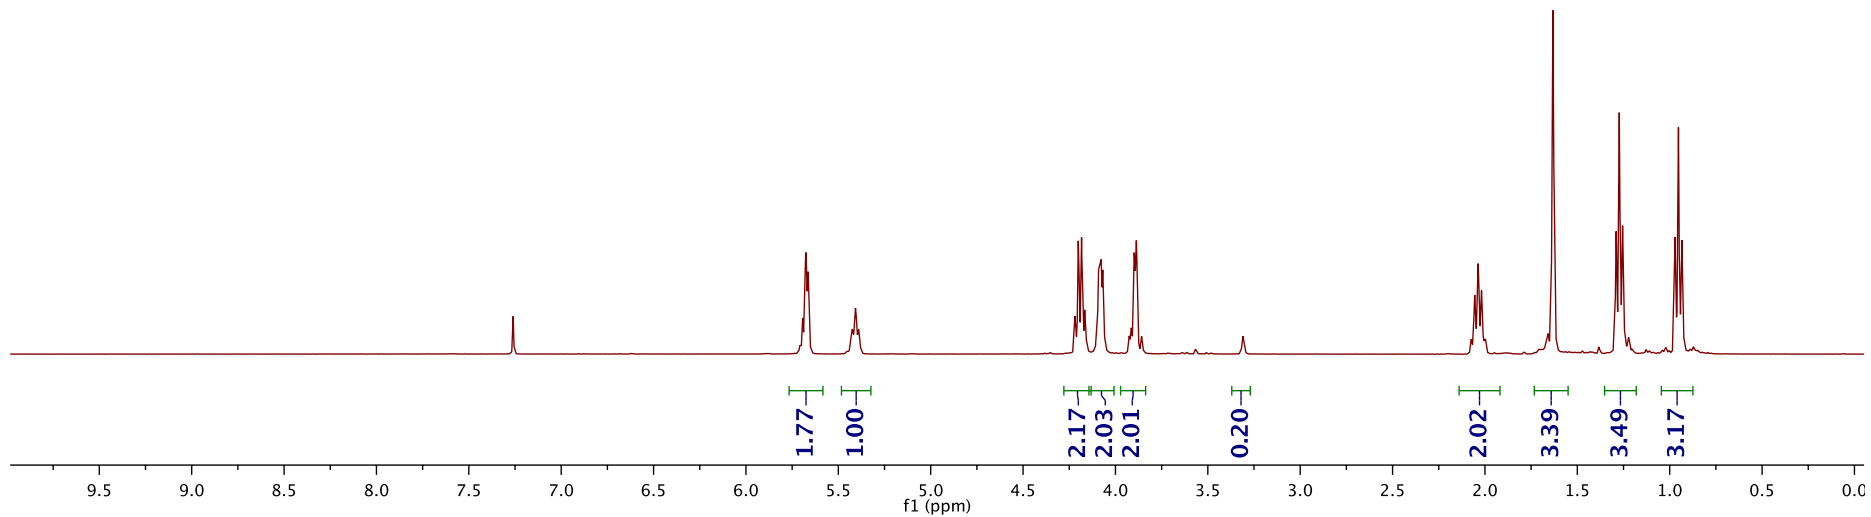

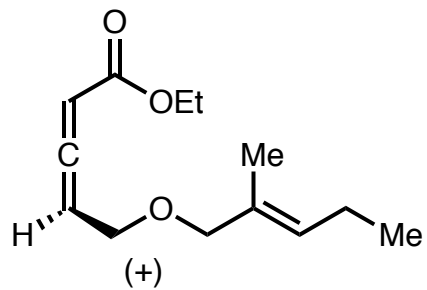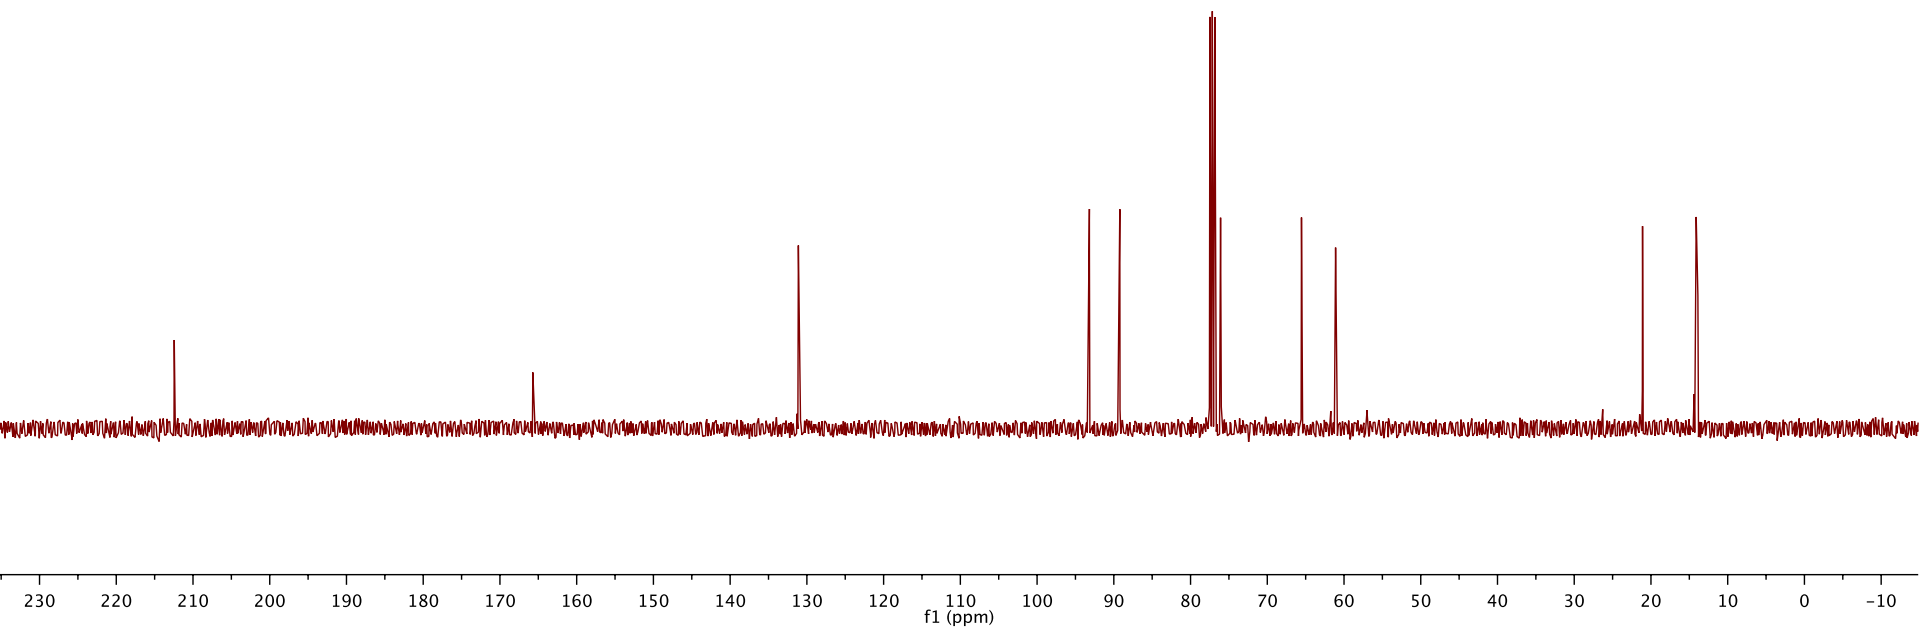



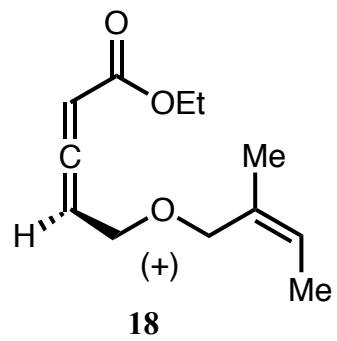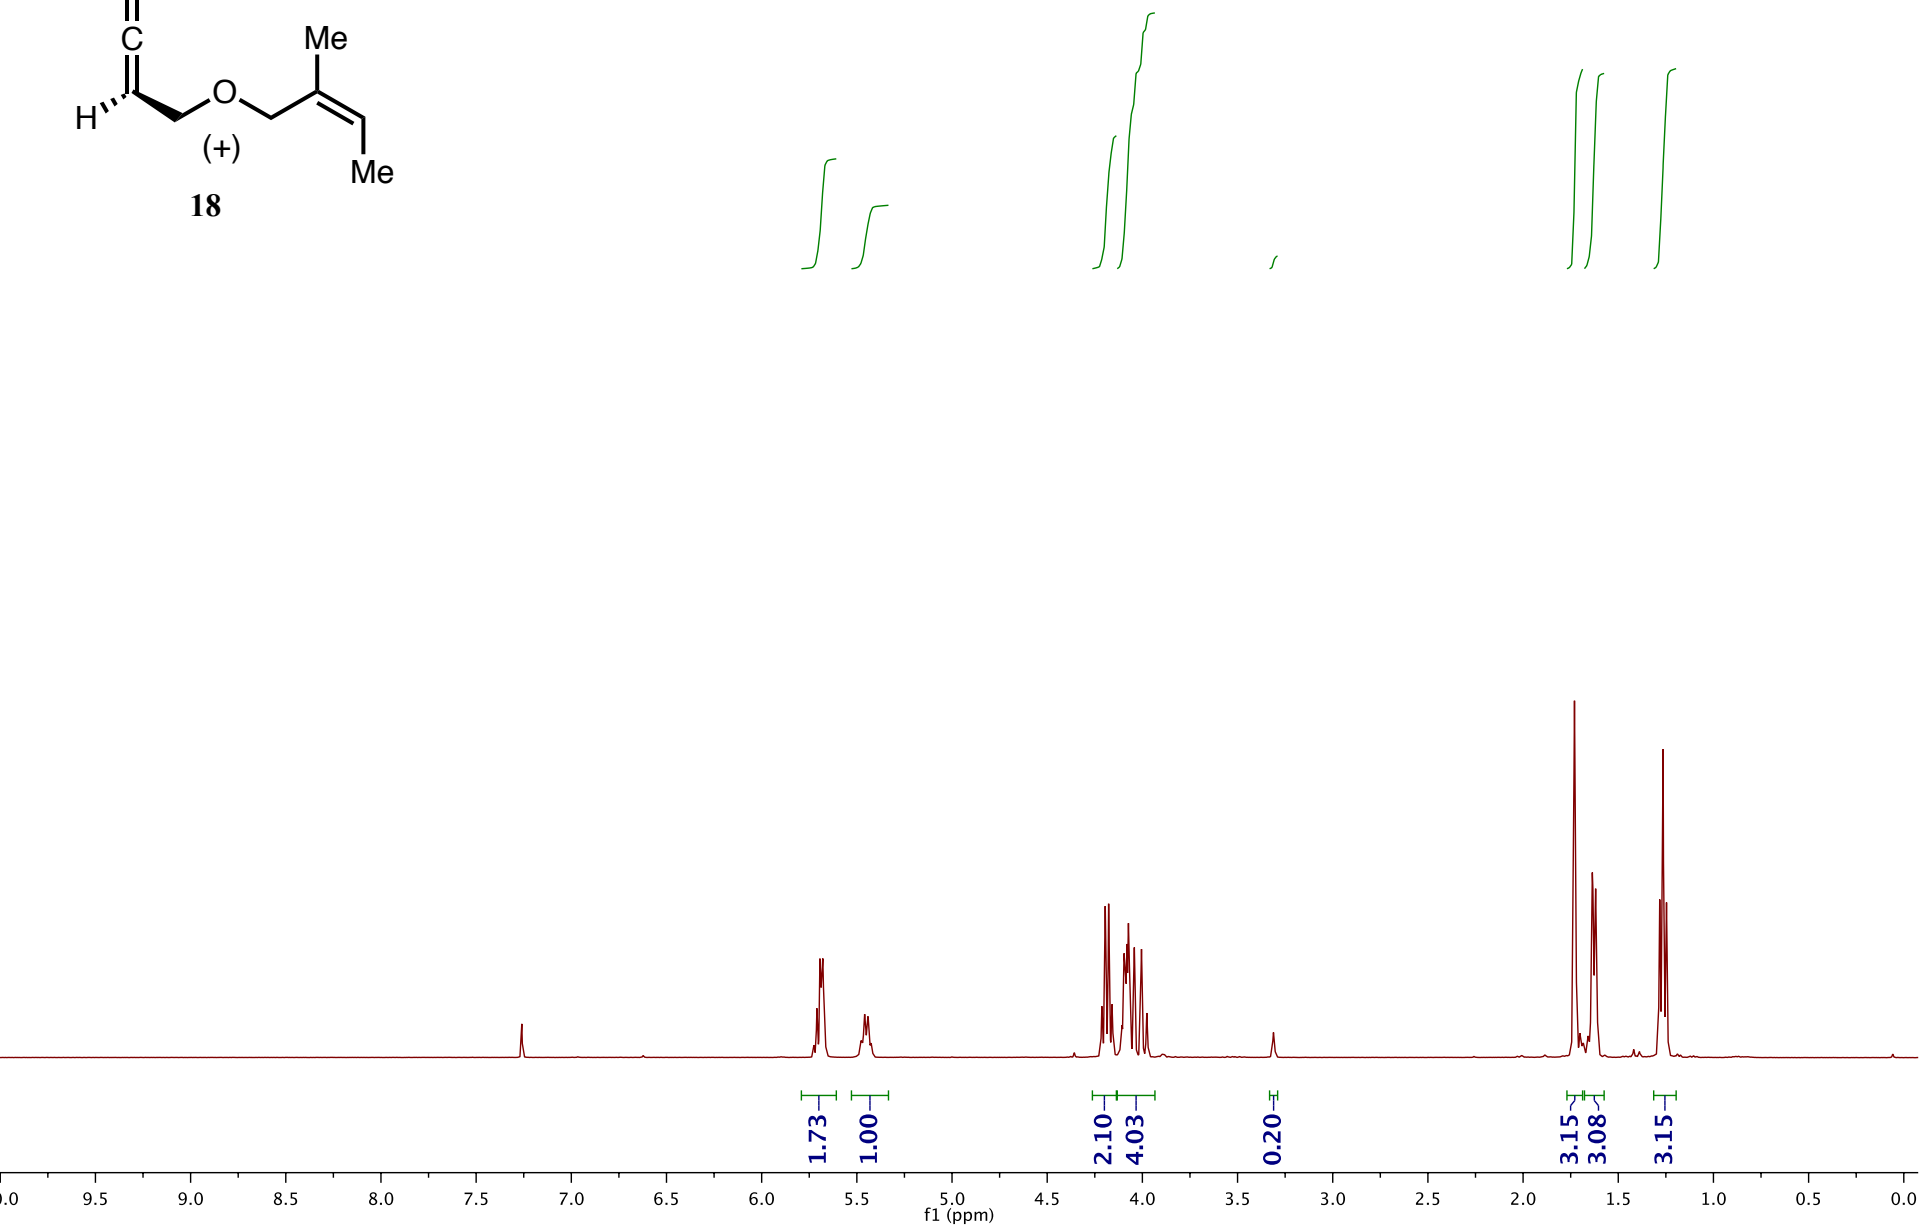

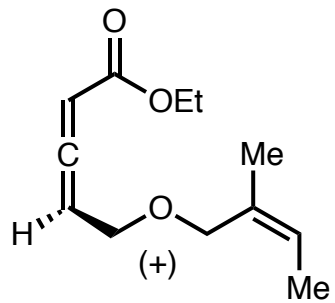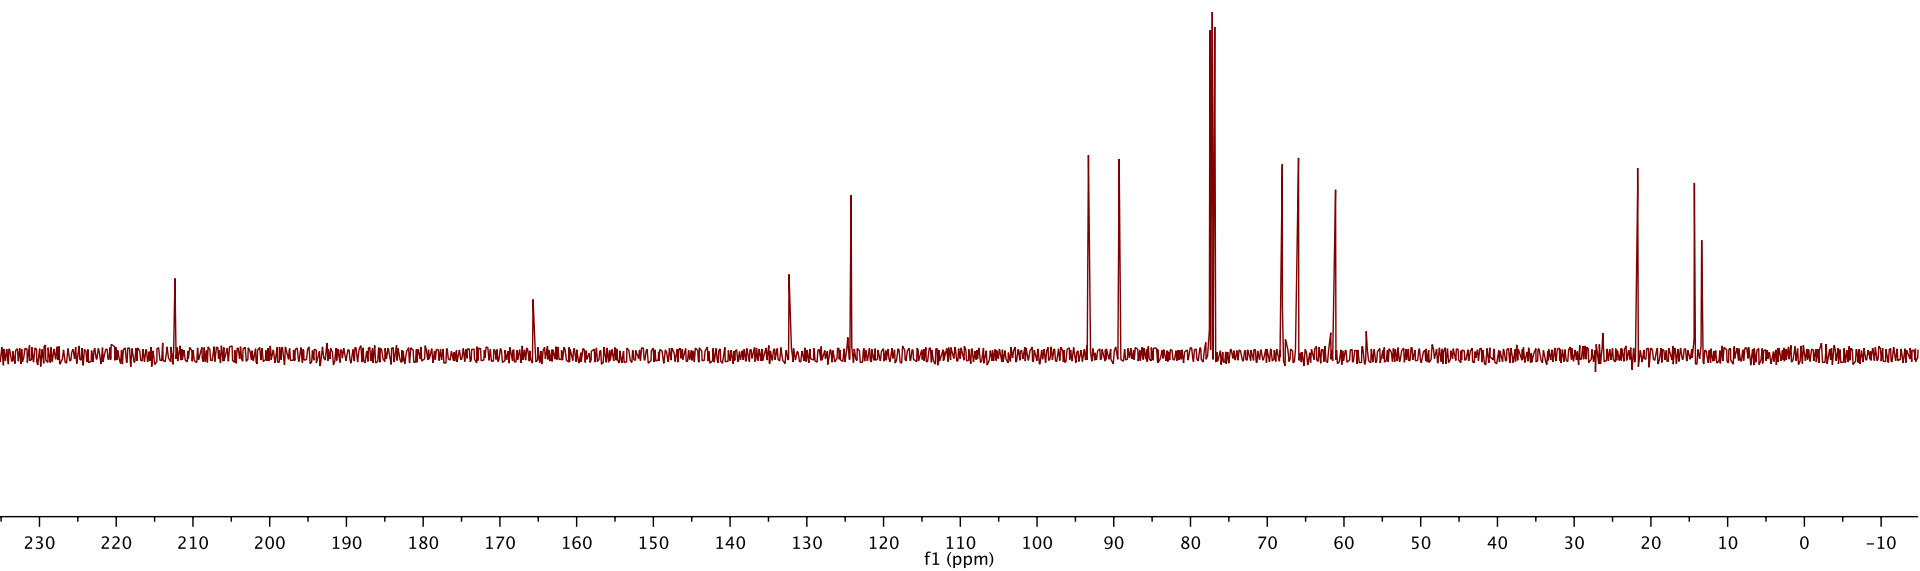

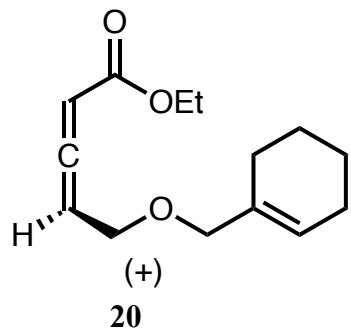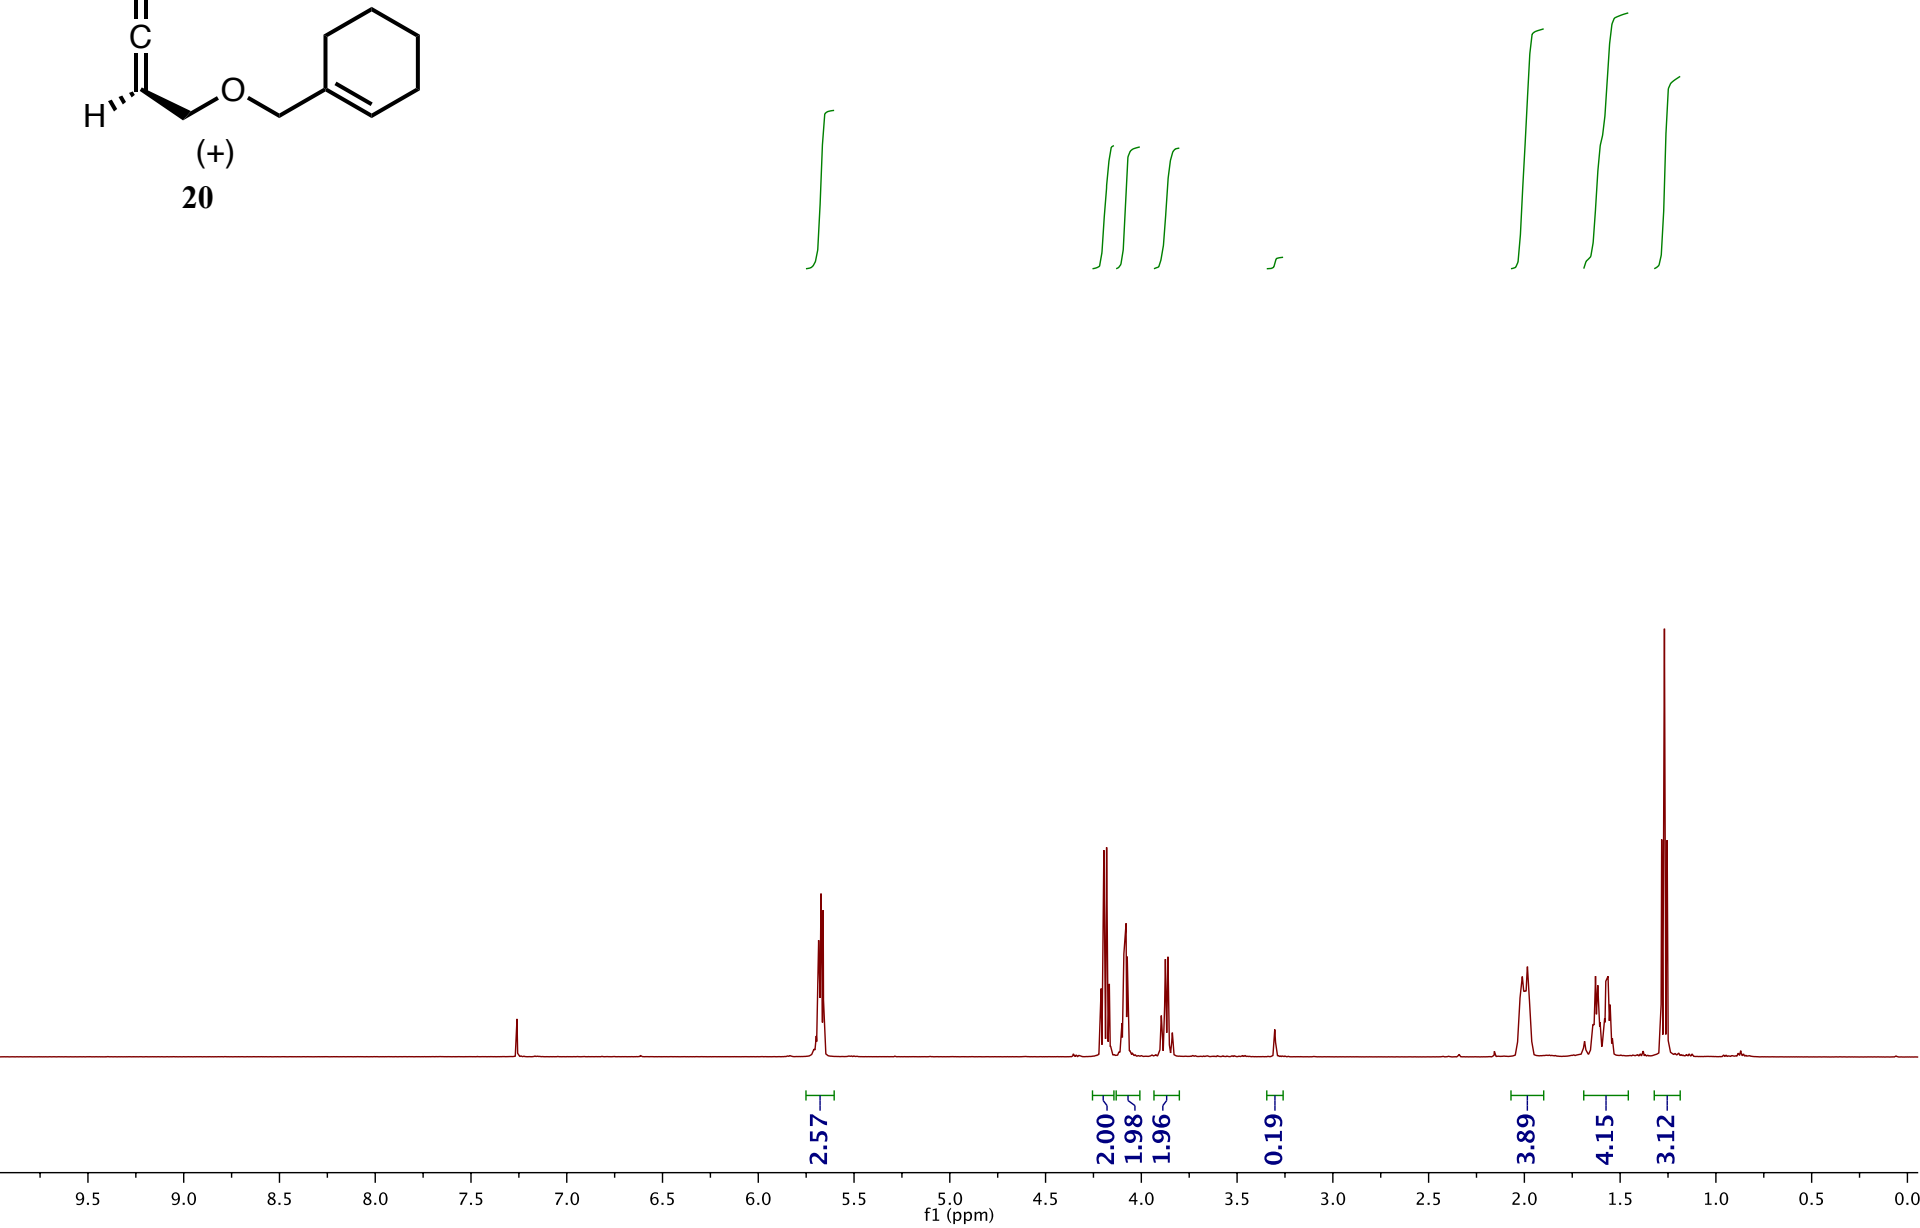

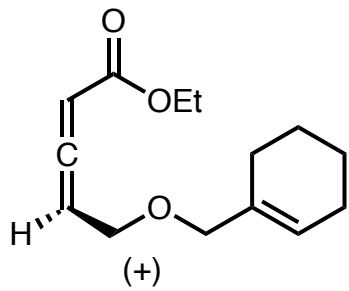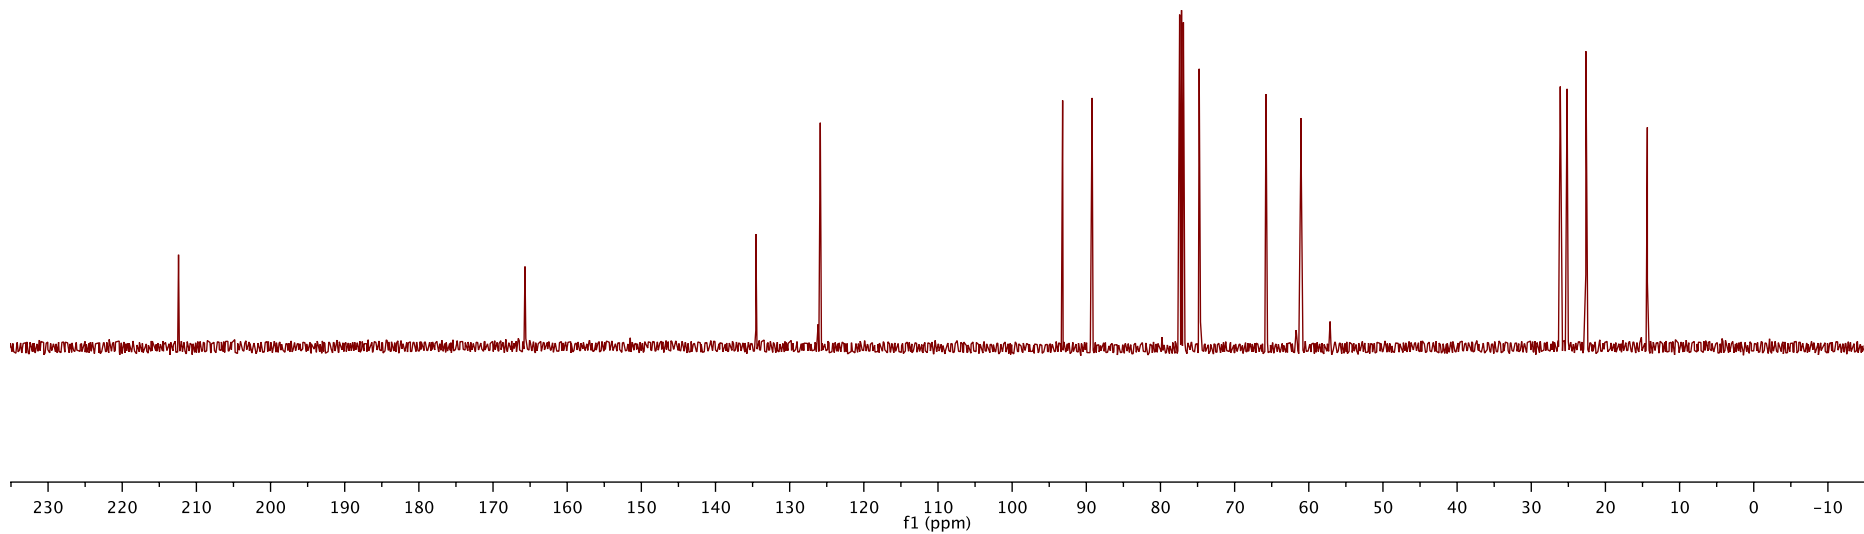

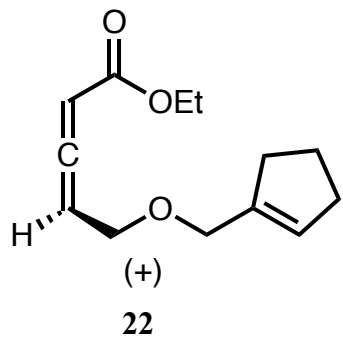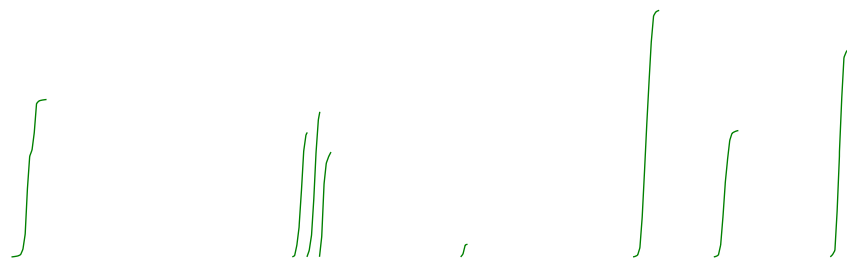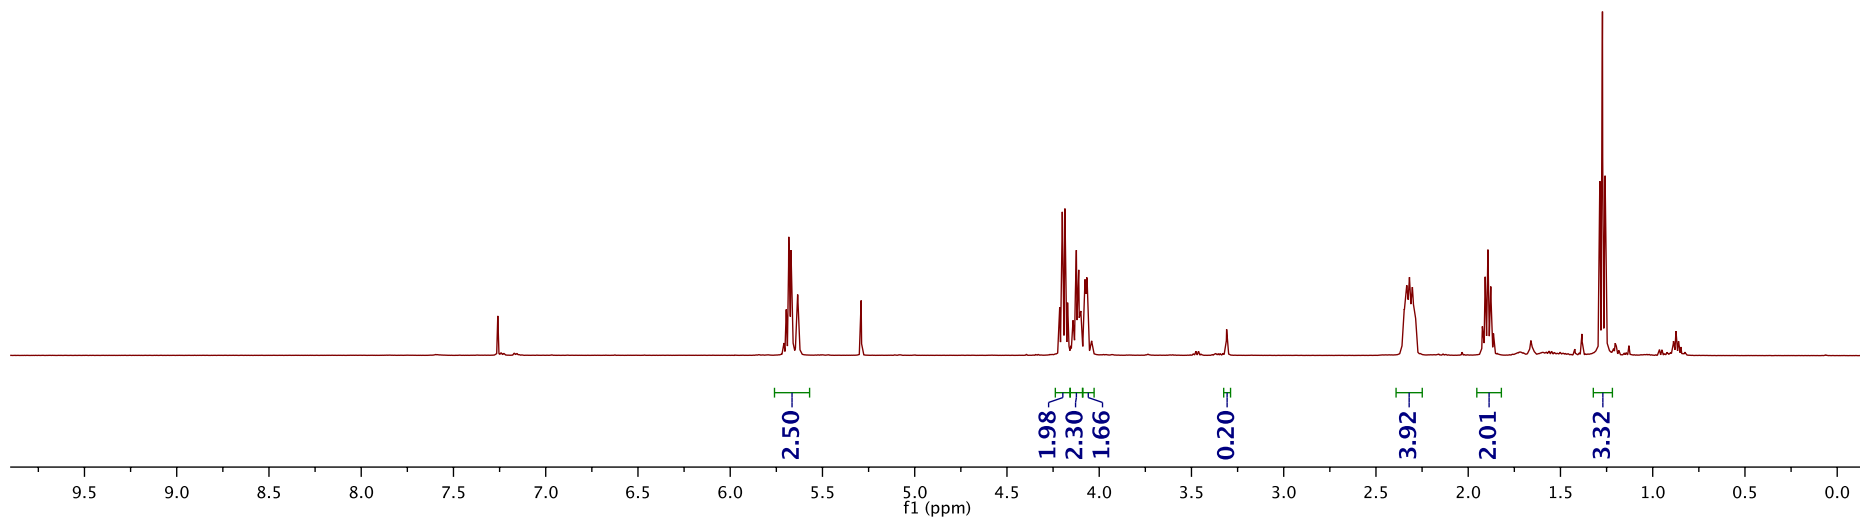

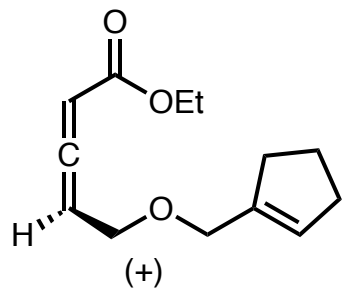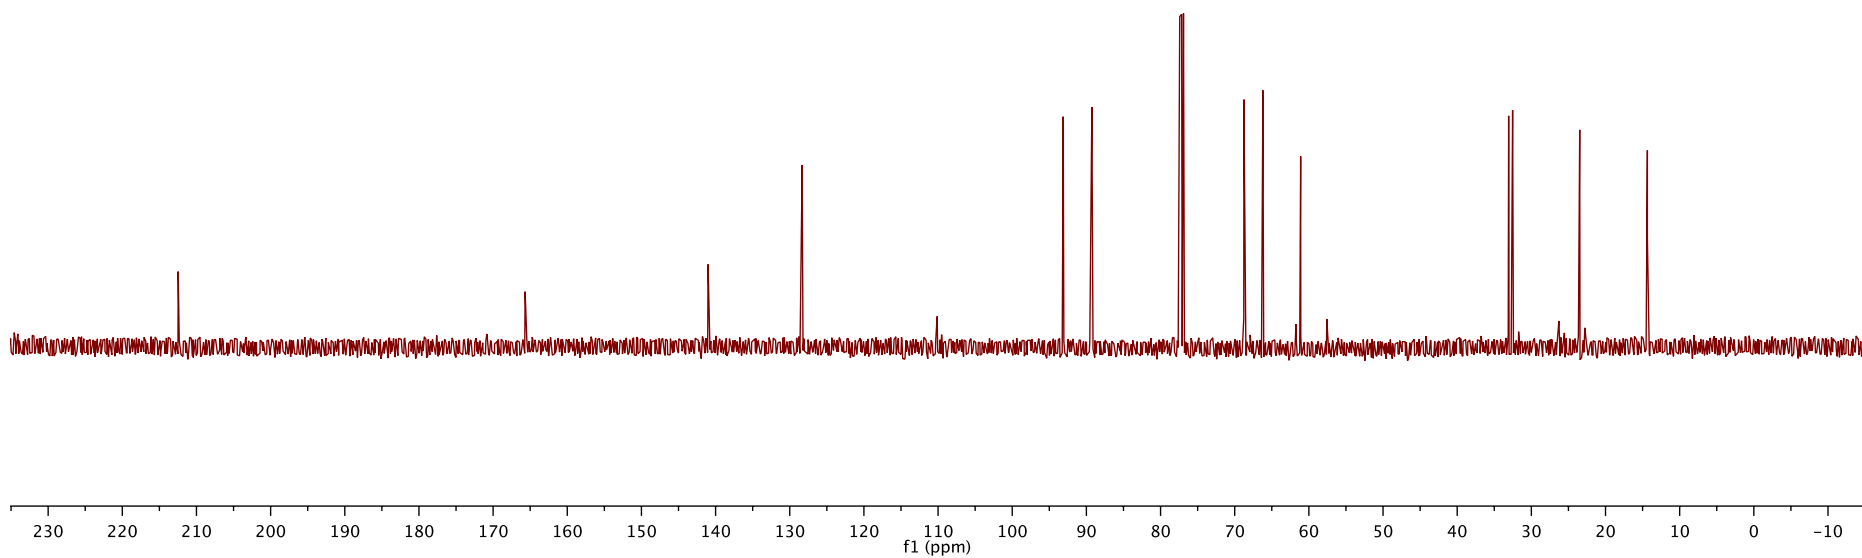

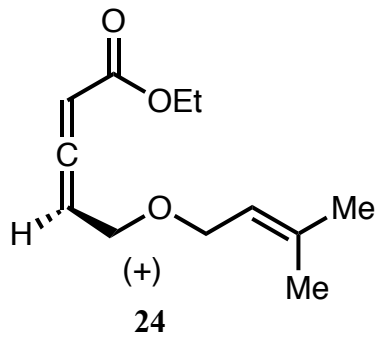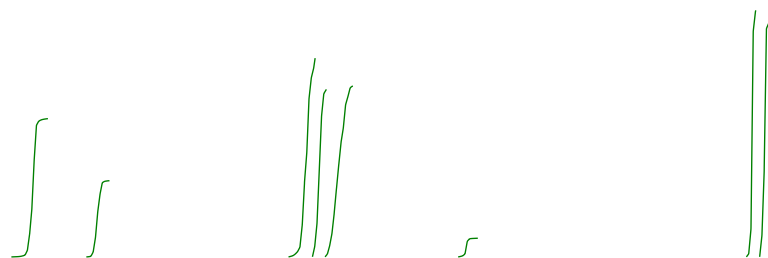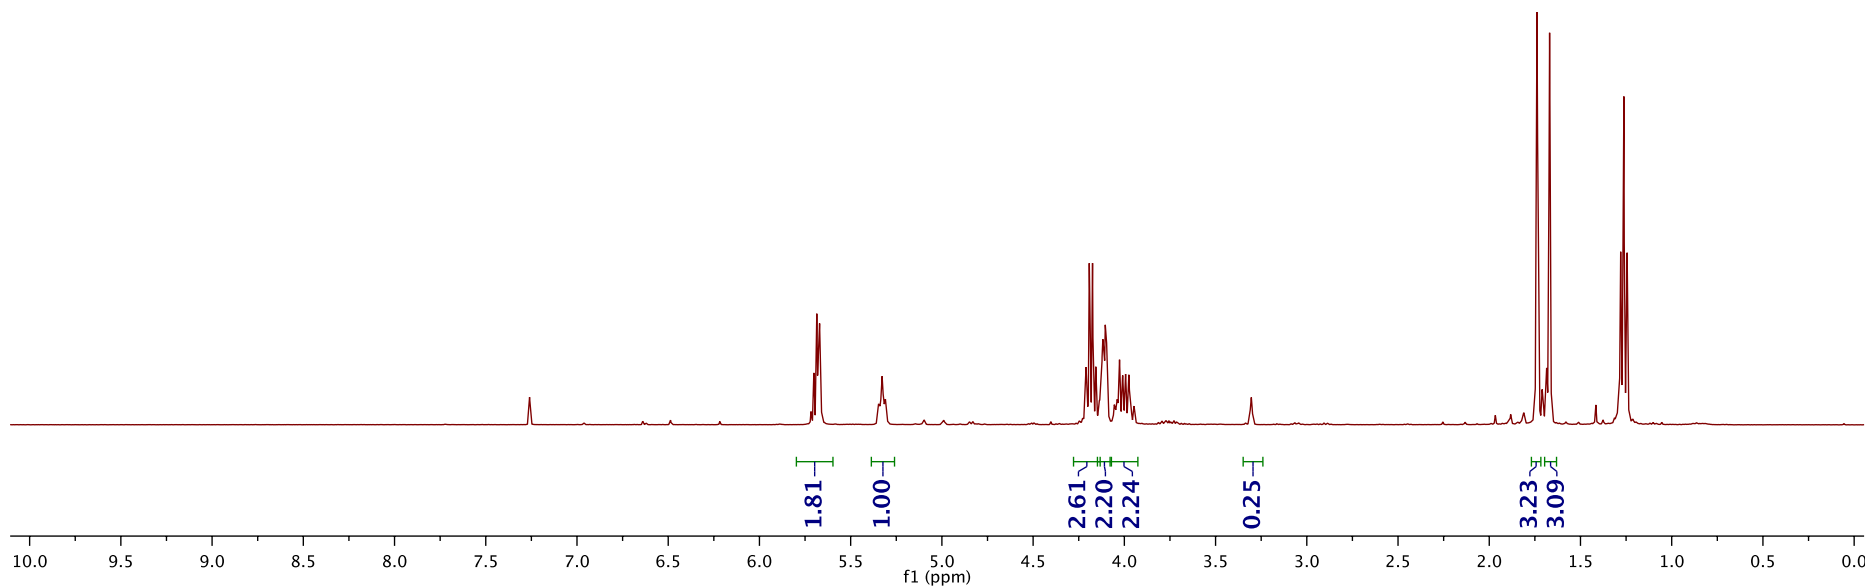

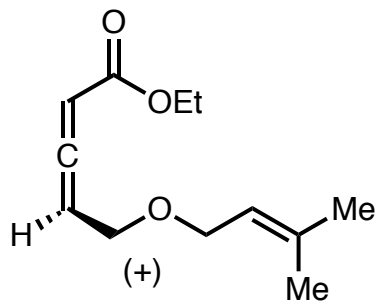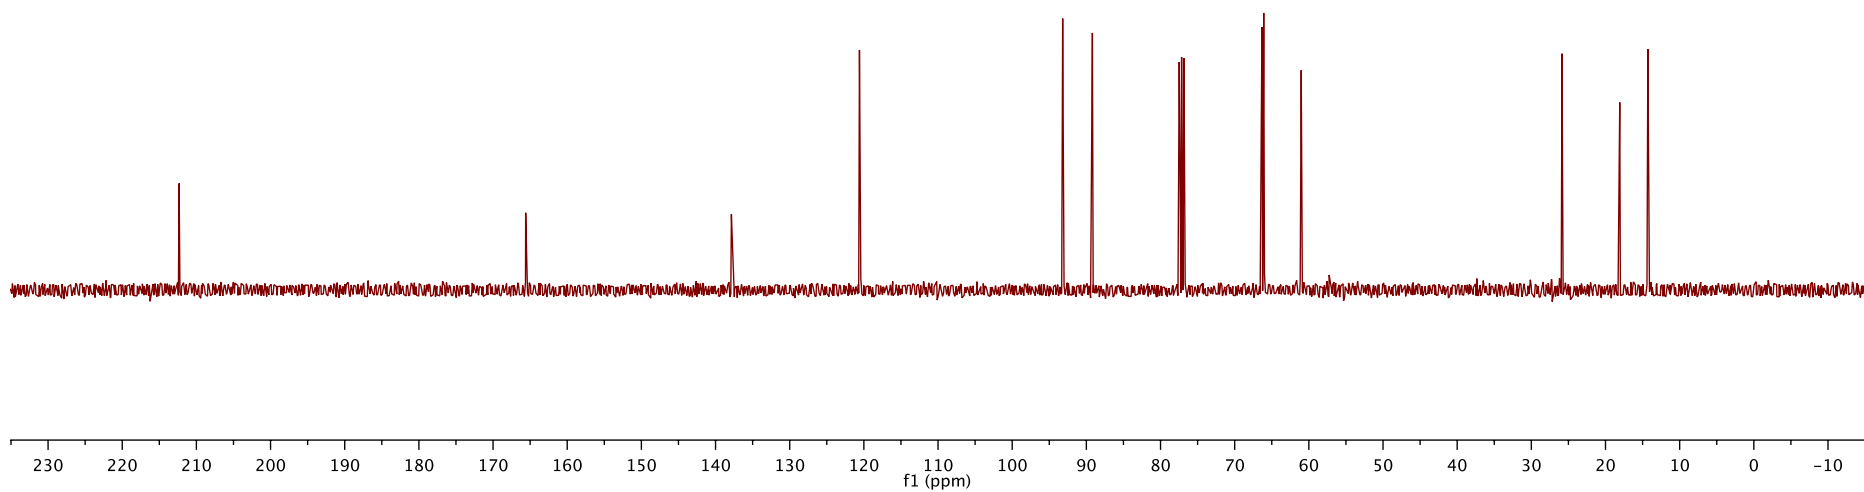



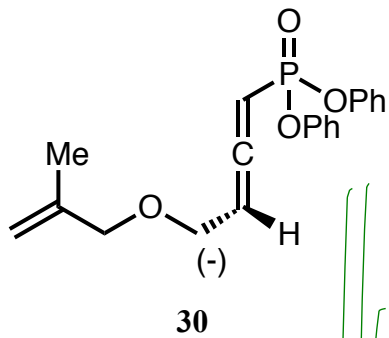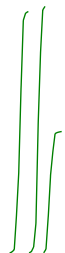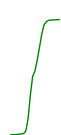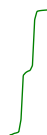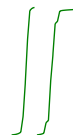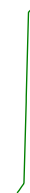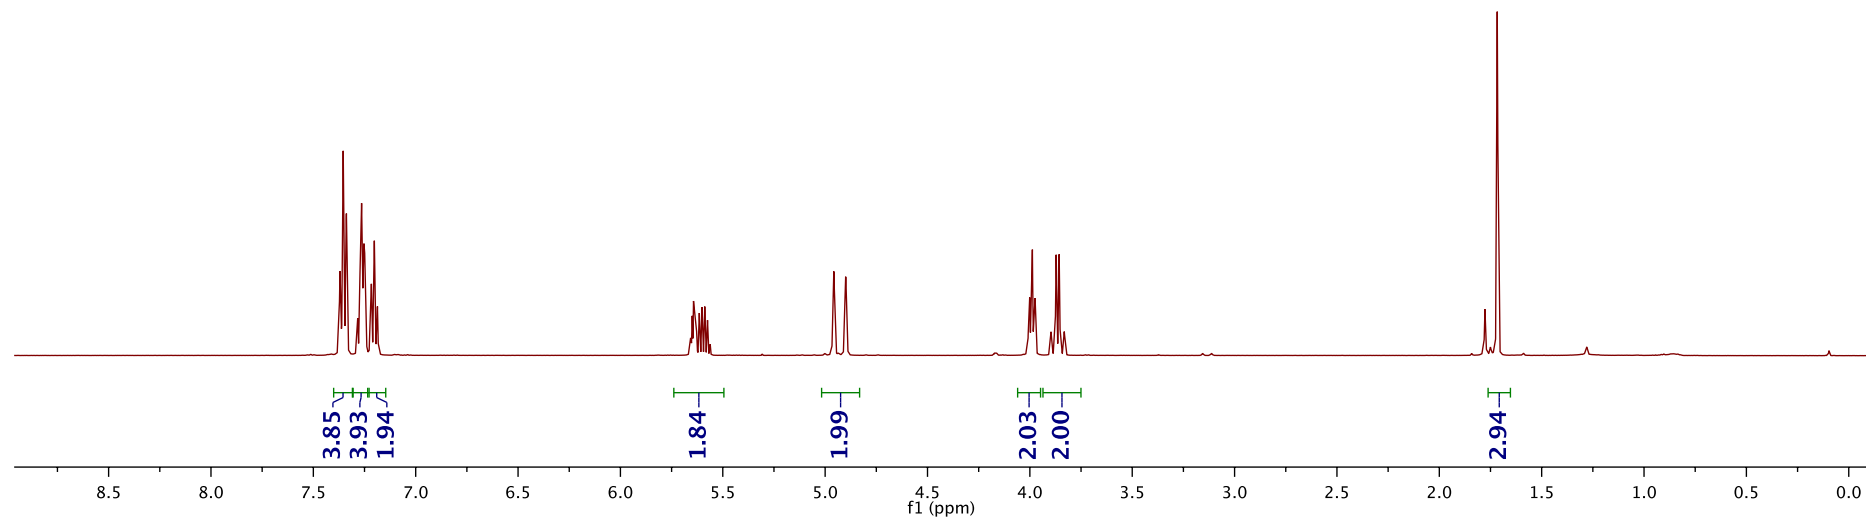

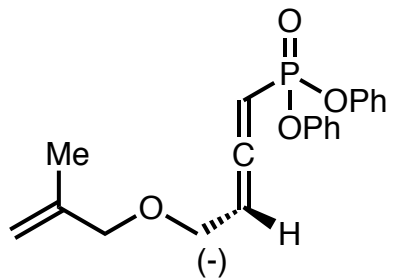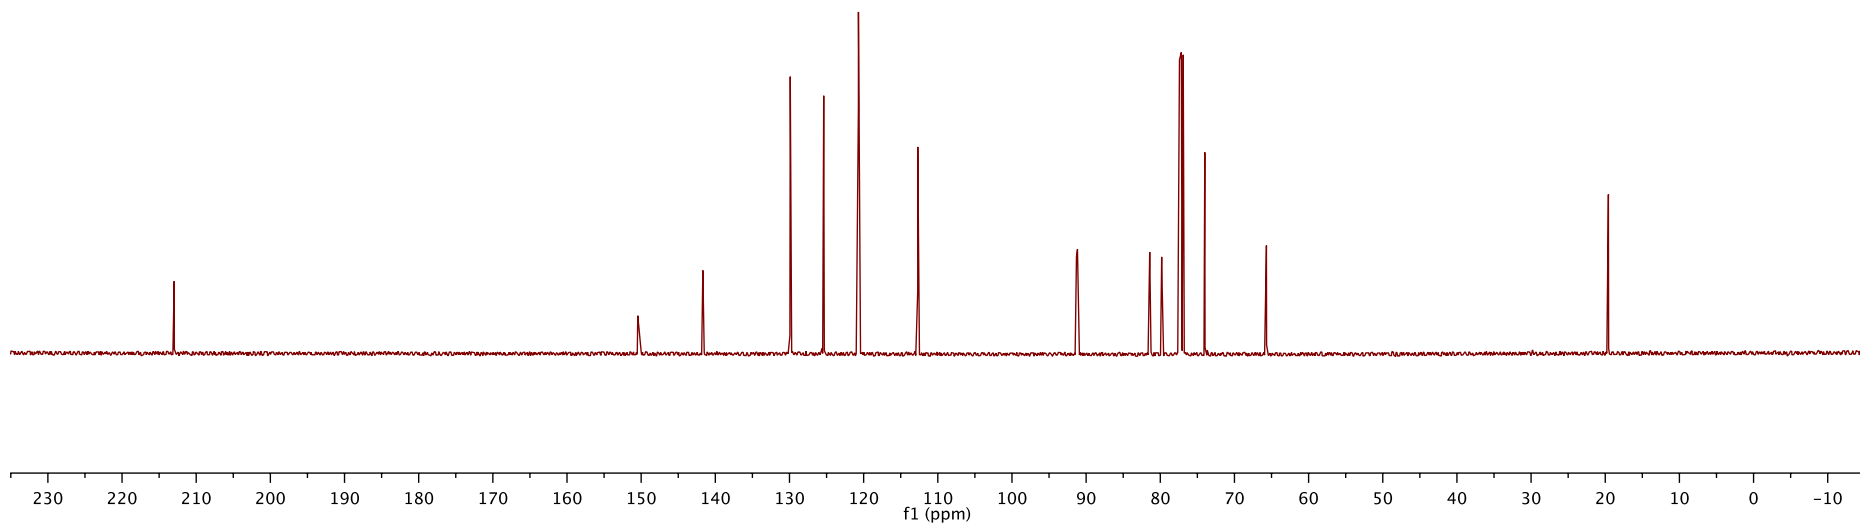

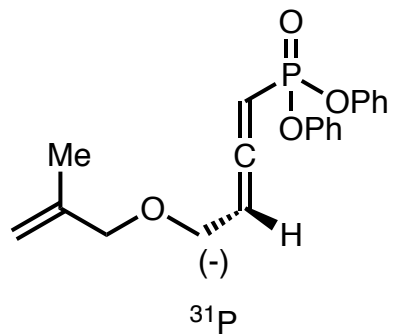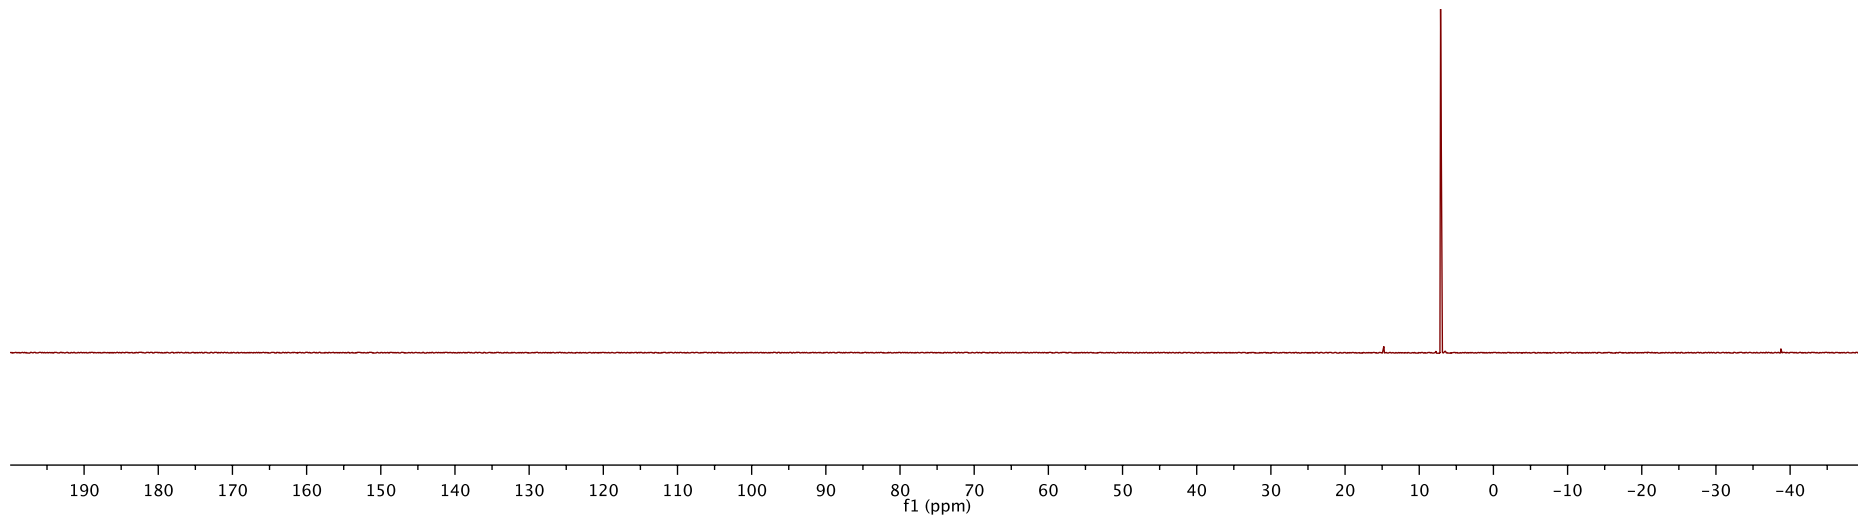

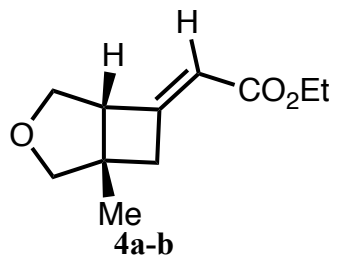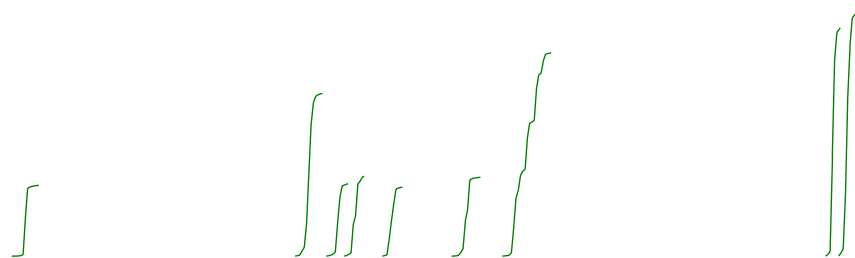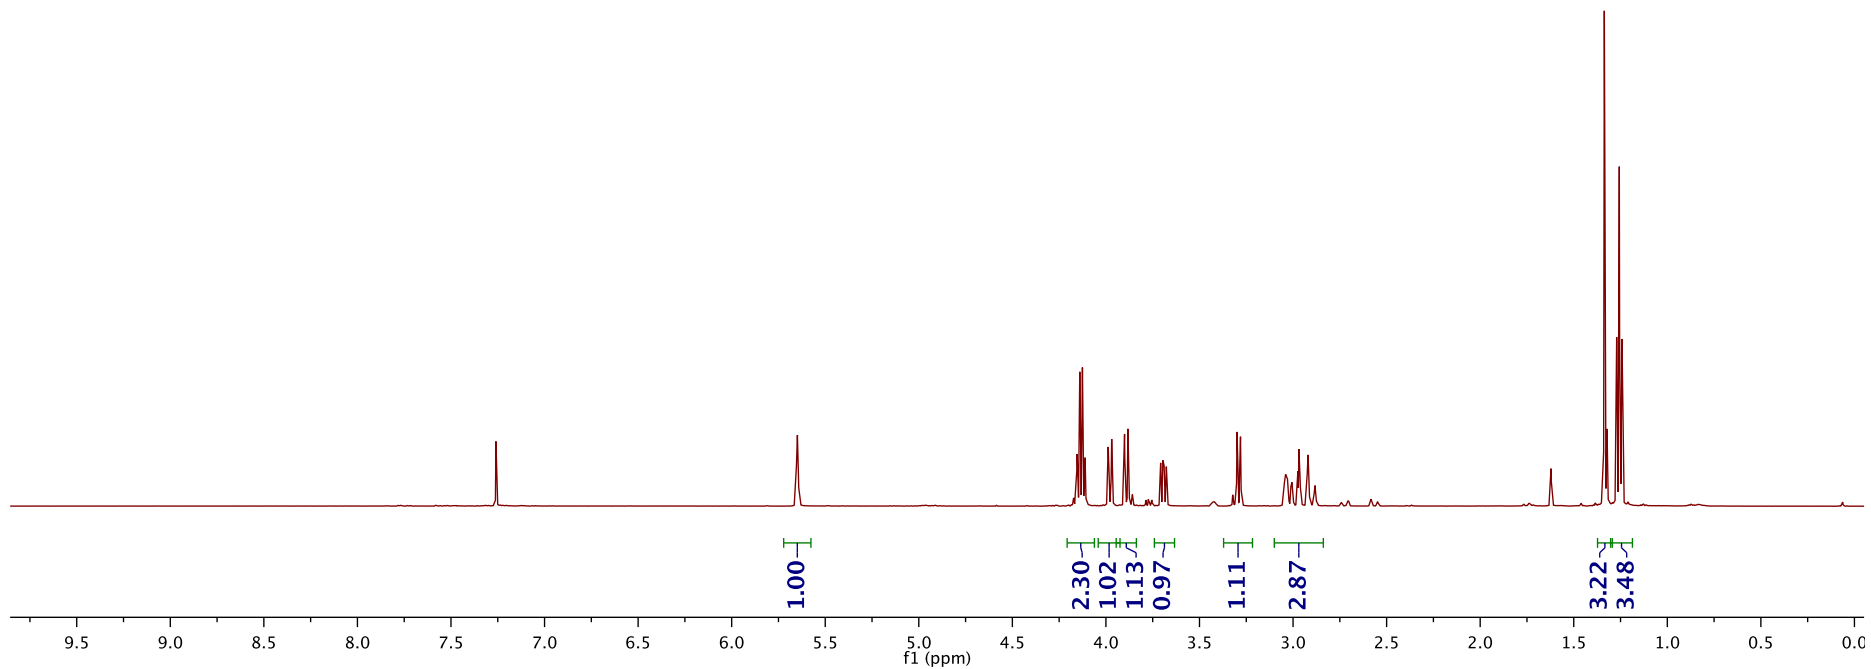

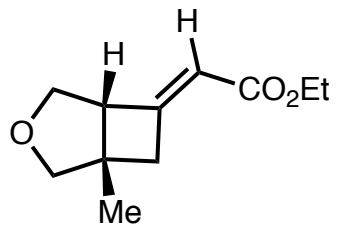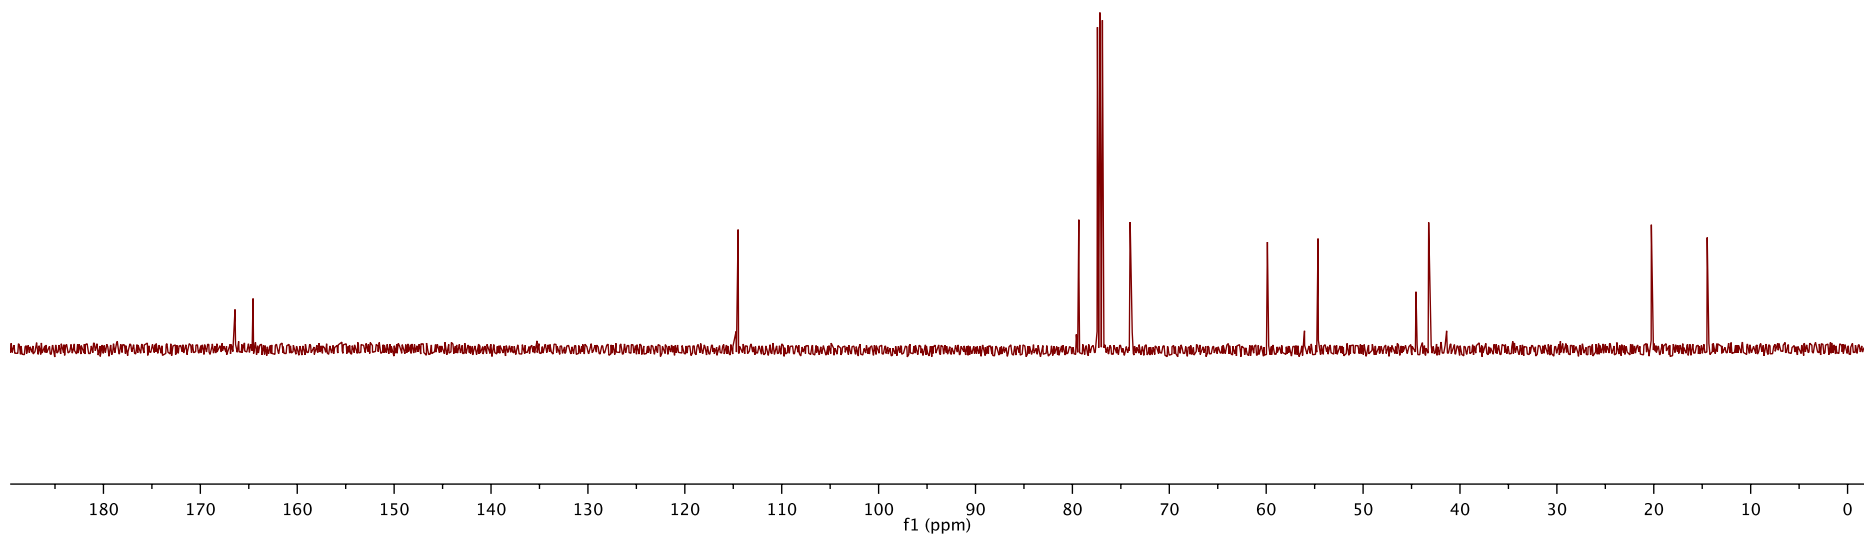

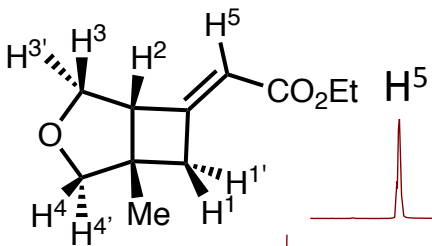

COSY

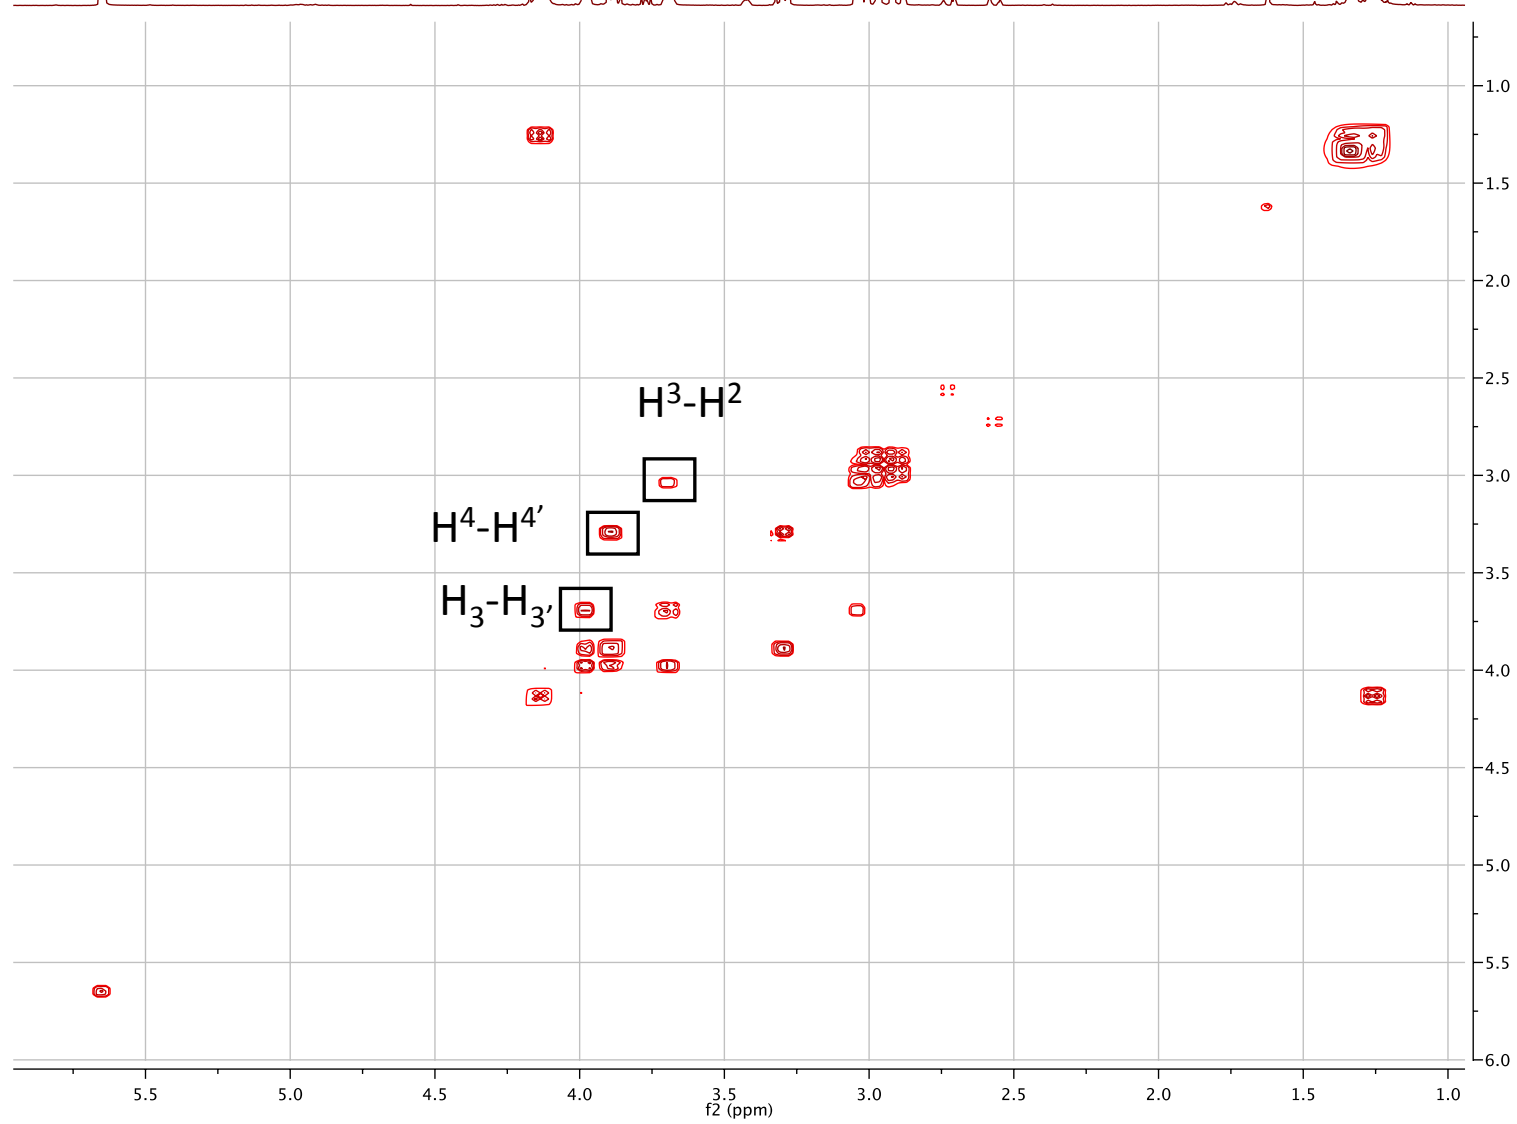

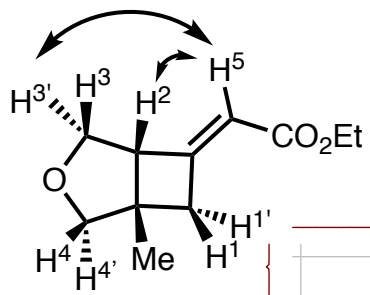

NOESY

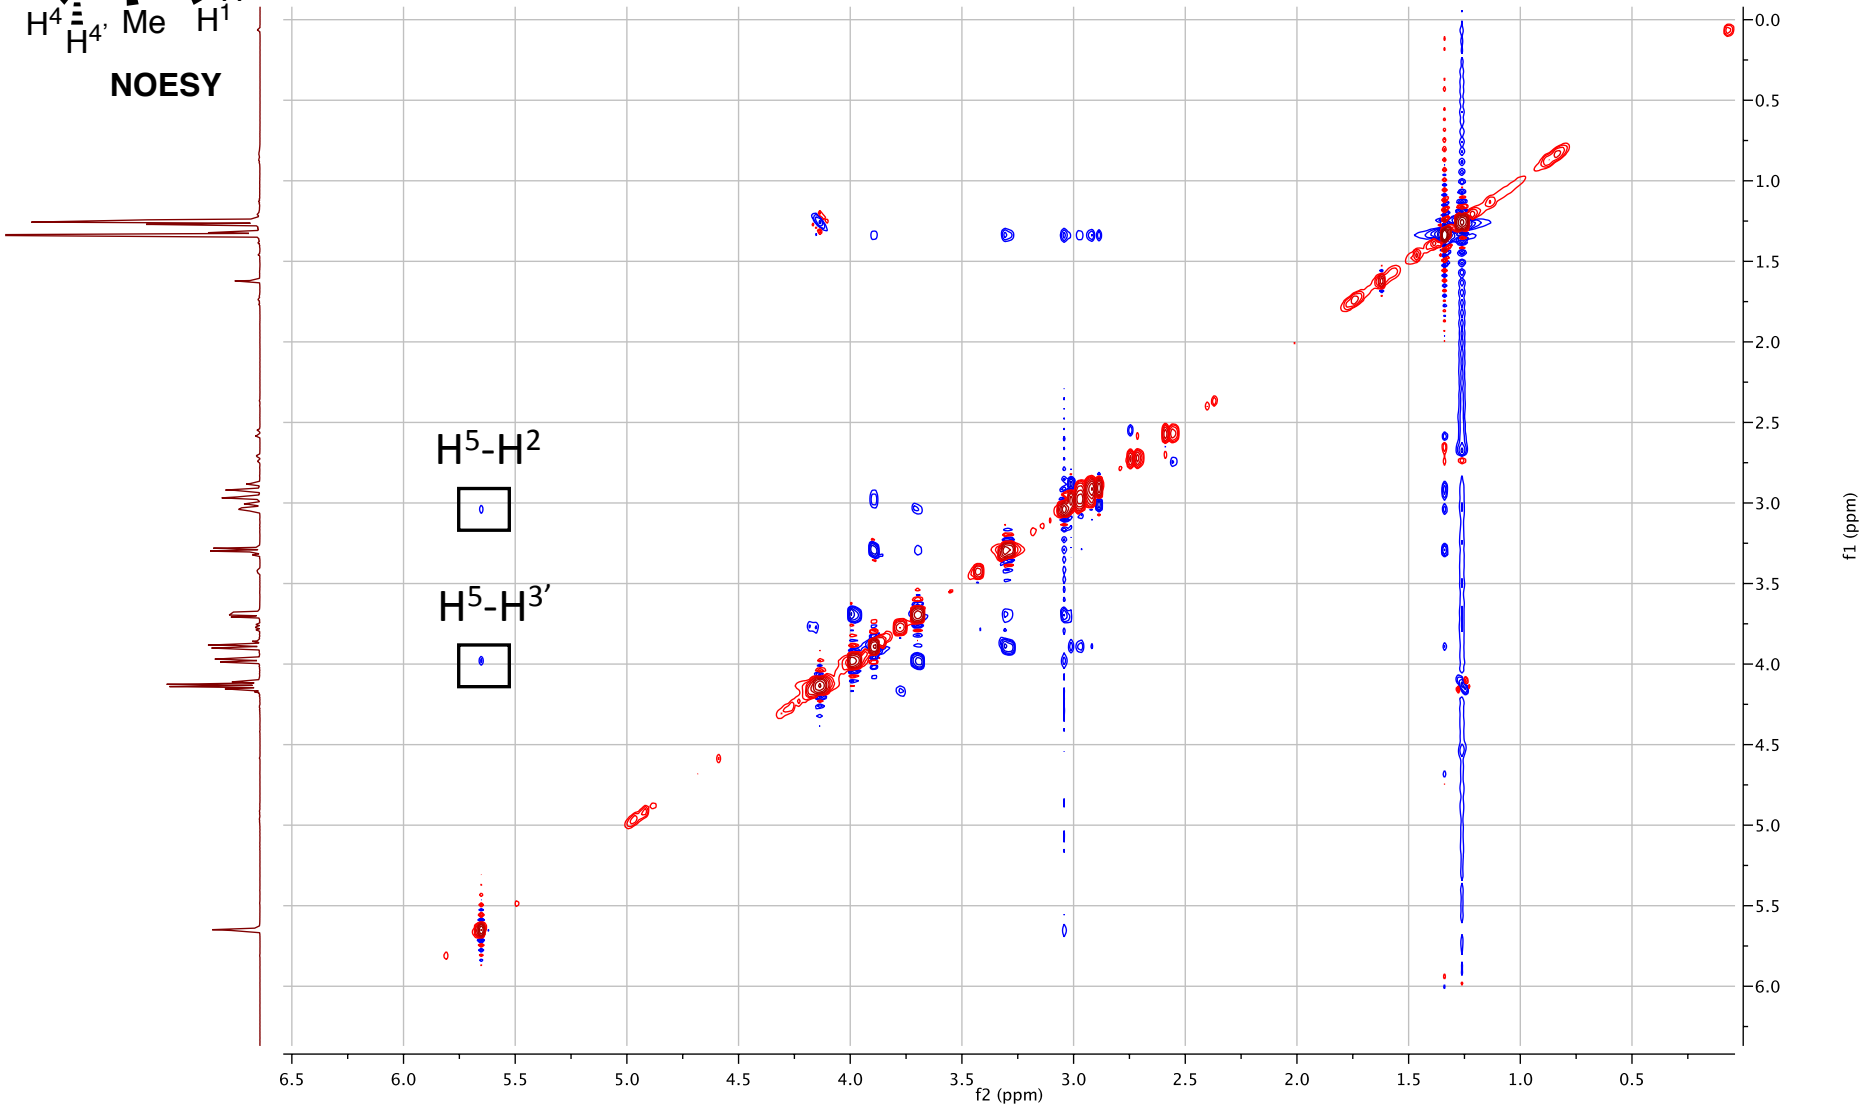

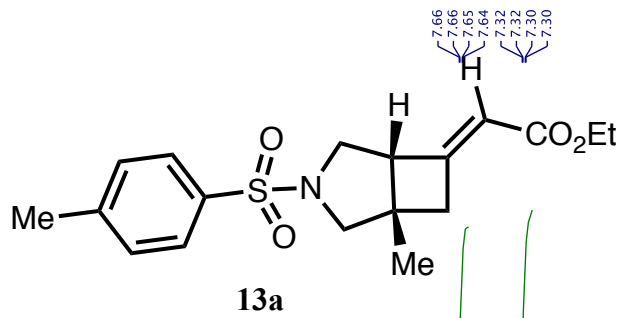

5.65  
5.64  
5.64  
5.63

Page S72

4.15  
4.14  
4.14  
4.13  
4.13  
4.12  
4.12  
4.11  
4.11  
4.10  
4.10  
3.54  
3.54  
3.52  
3.52  
3.49  
3.48  
3.47  
3.46  
3.10  
3.10  
3.09  
3.07  
3.06  
3.06  
3.05  
2.92  
2.91  
2.90  
2.88  
2.87  
2.81  
2.81  
2.80  
2.80  
2.79  
2.78  
2.77  
2.77  
2.41  
2.41  
2.39  
2.39  
2.37  
2.37  
1.27  
1.27  
1.26  
1.25  
1.24  
1.24  
1.21  
1.21

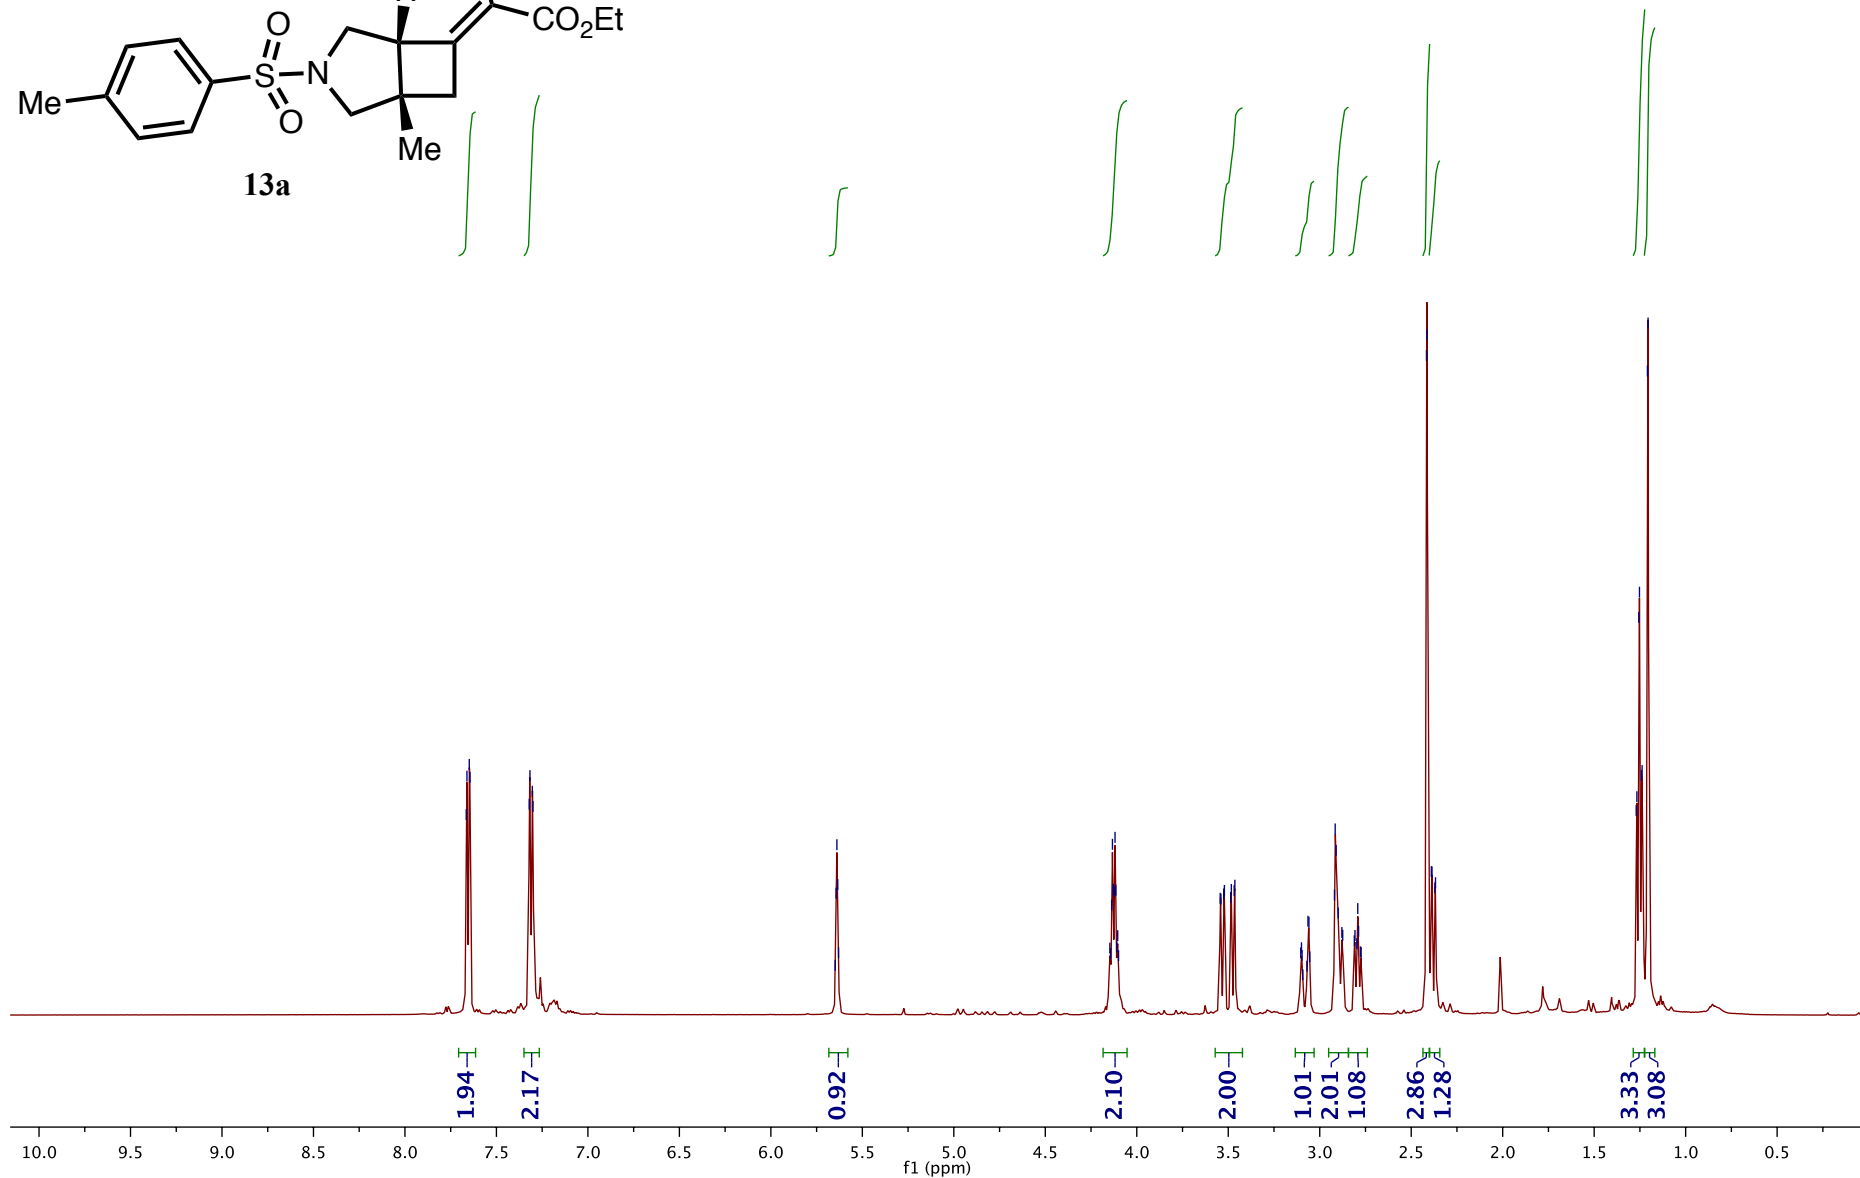



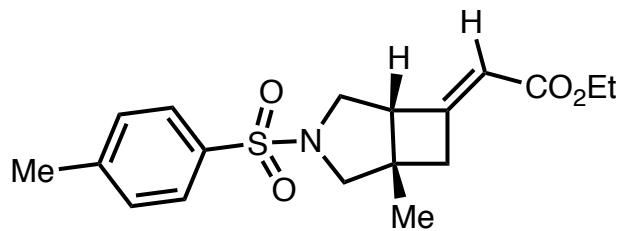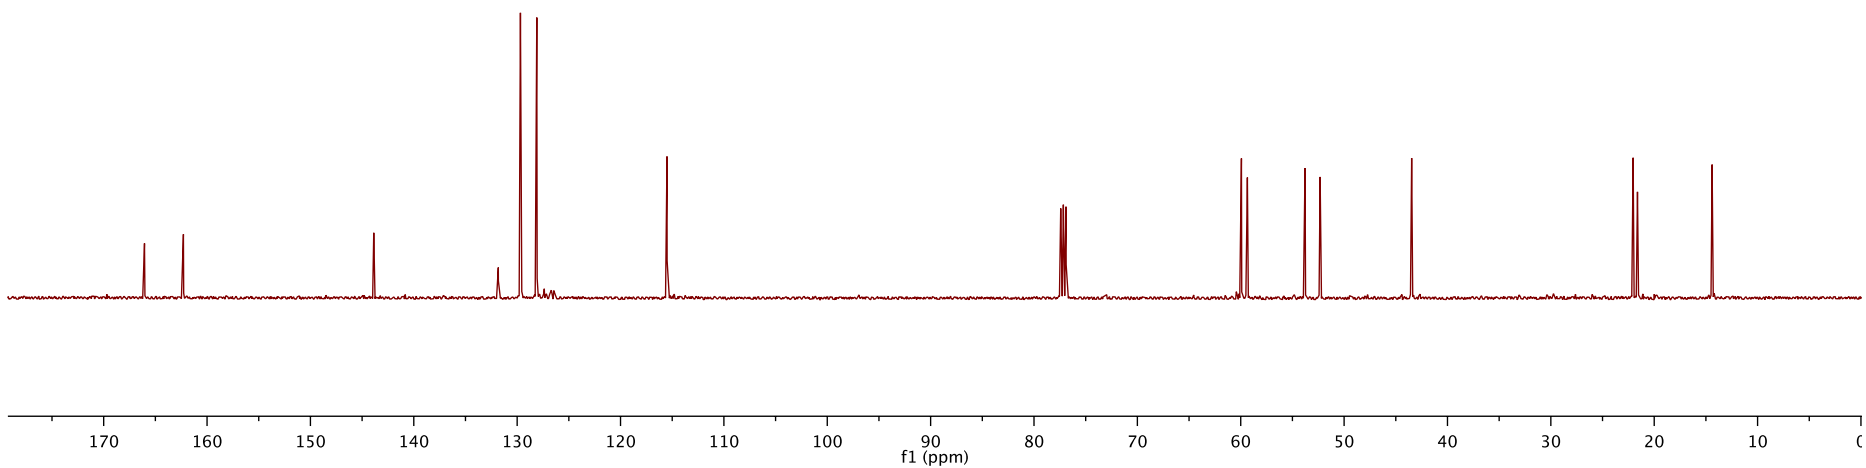

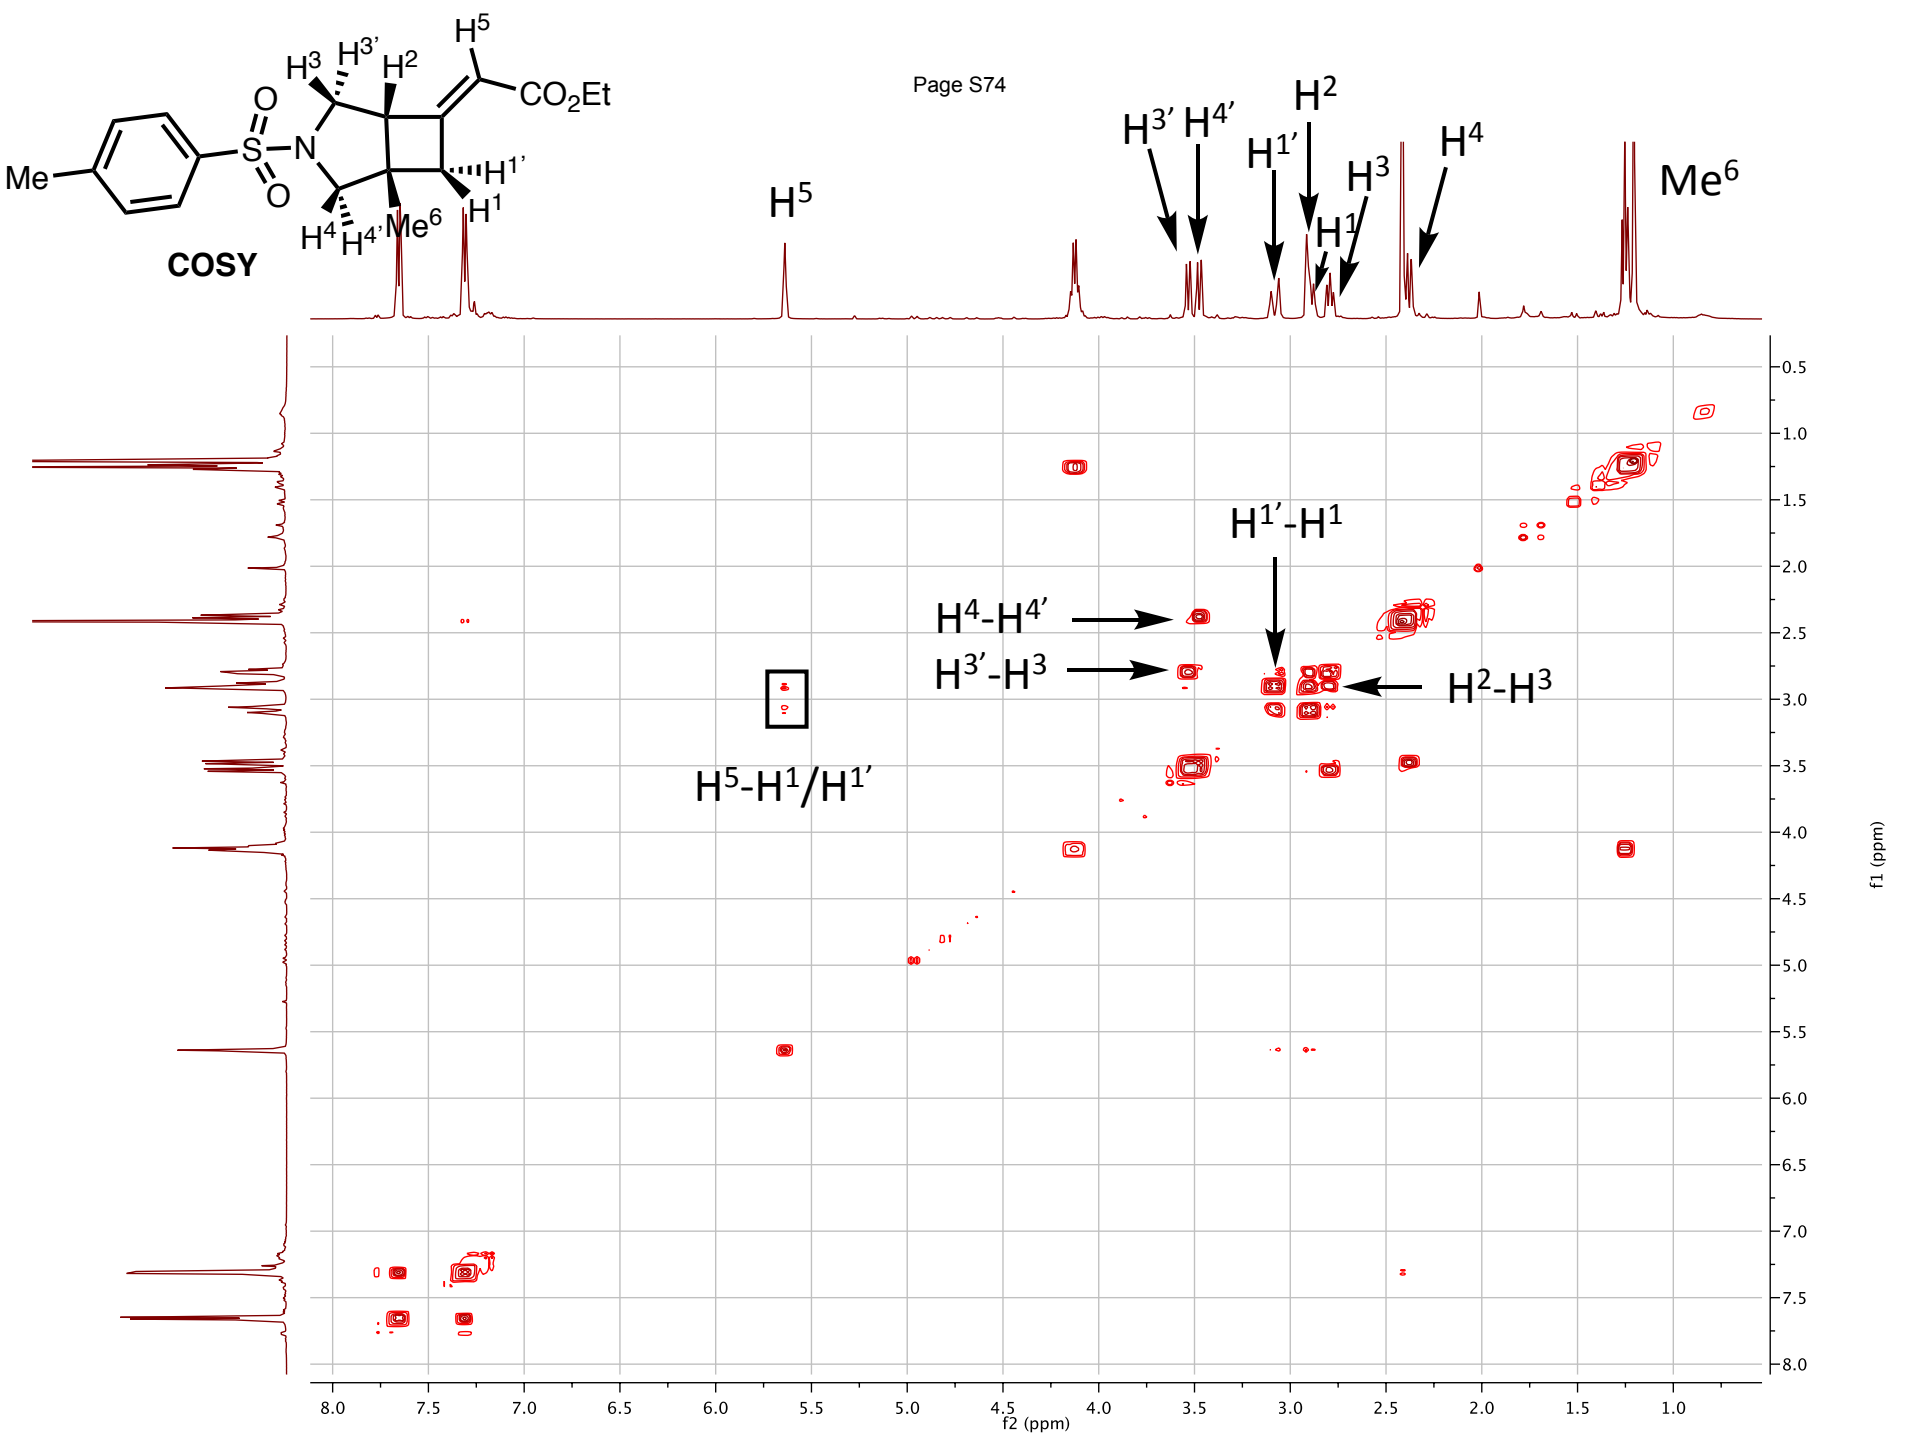

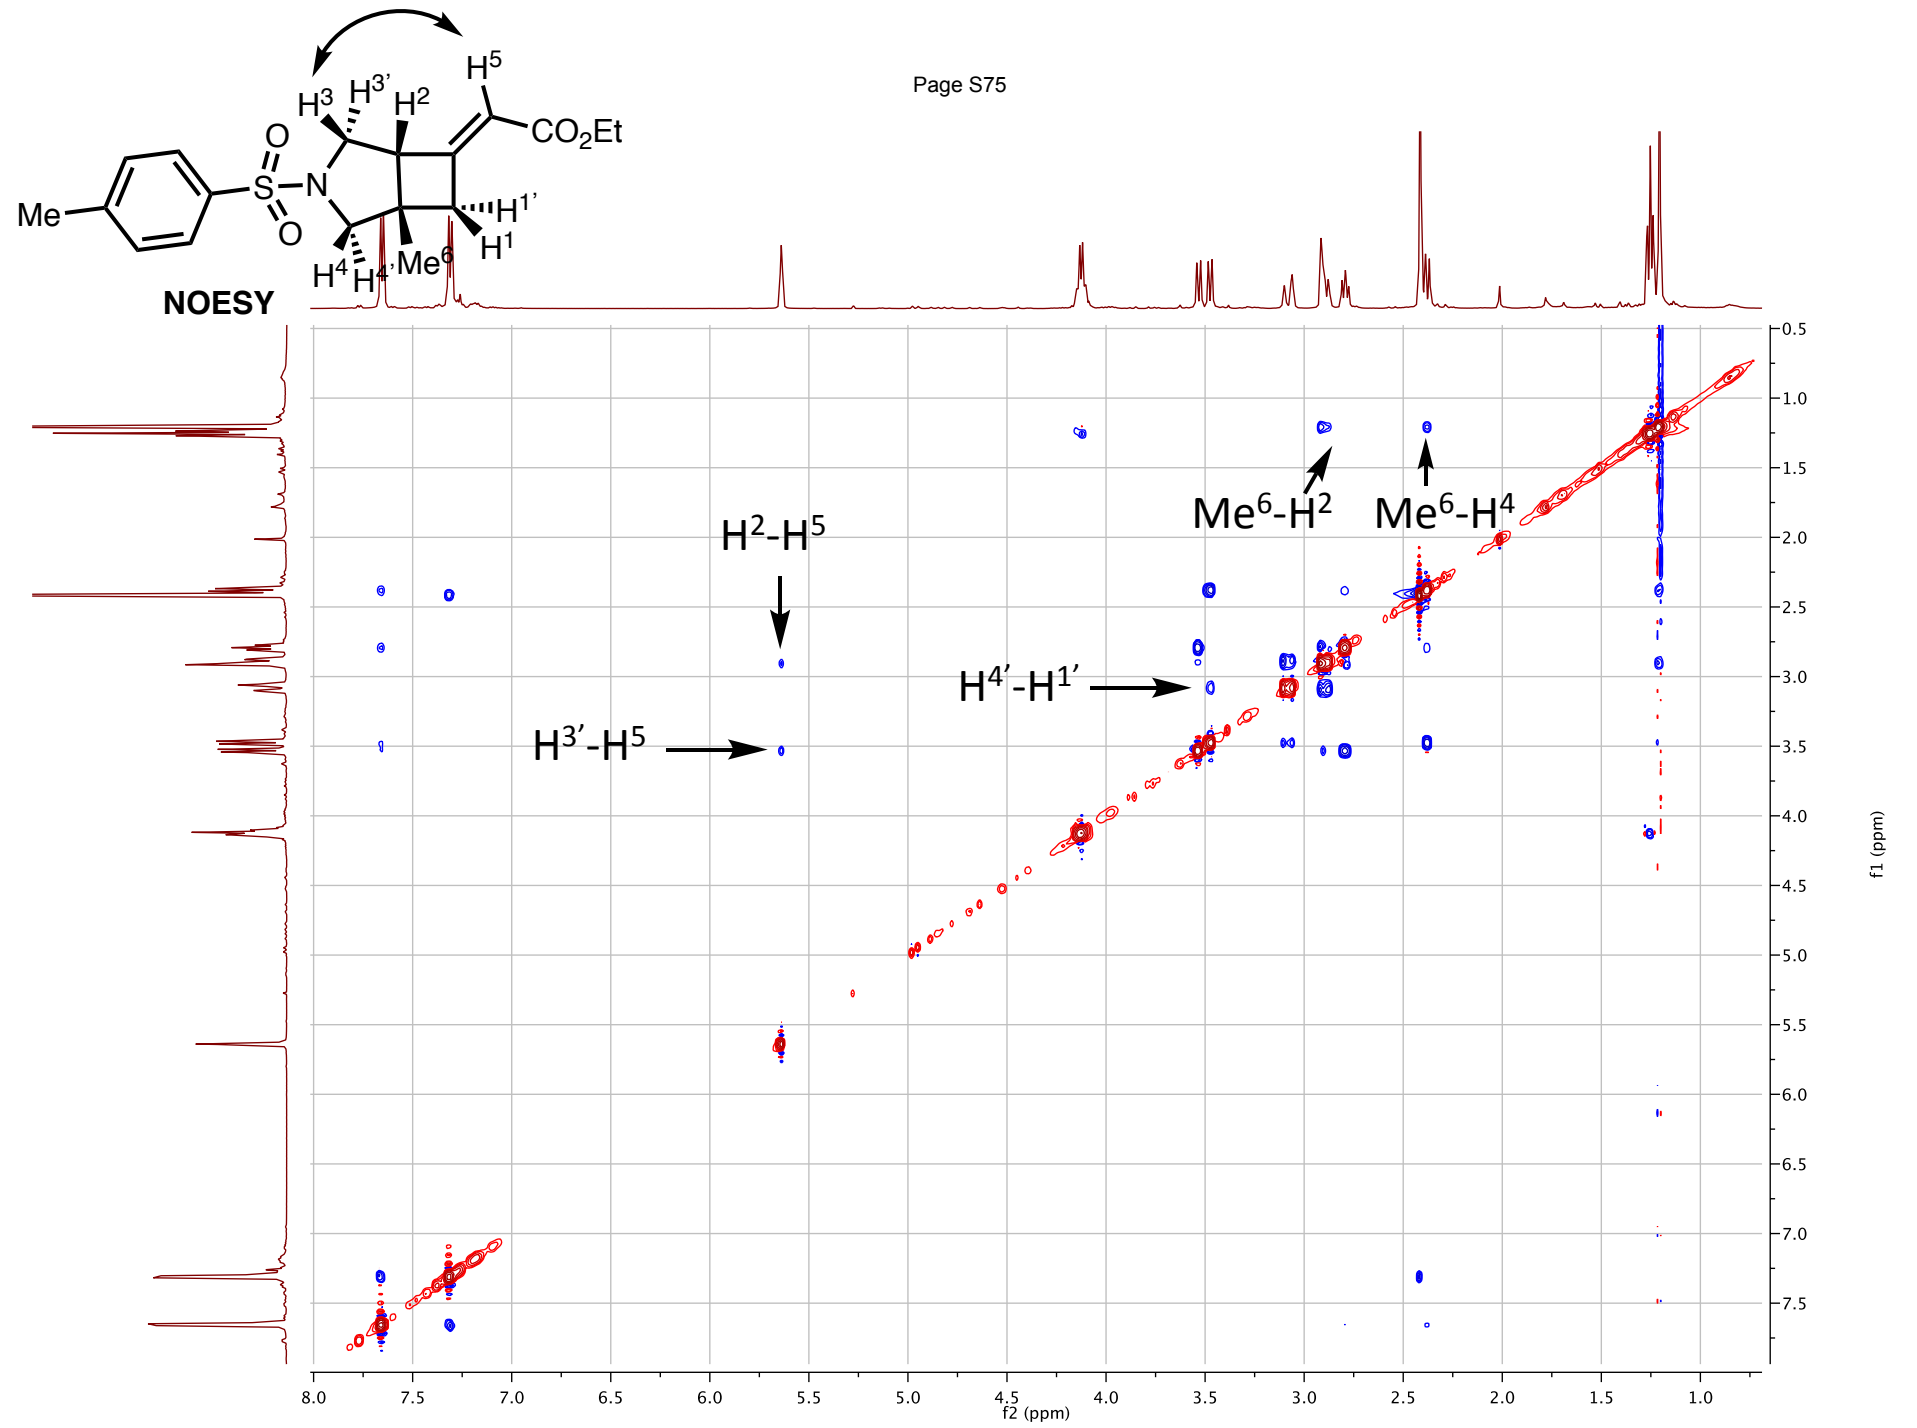

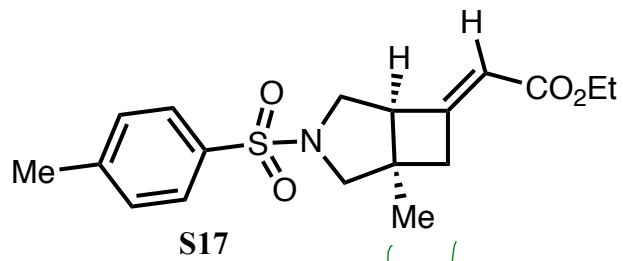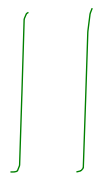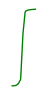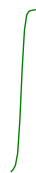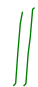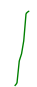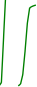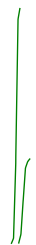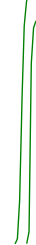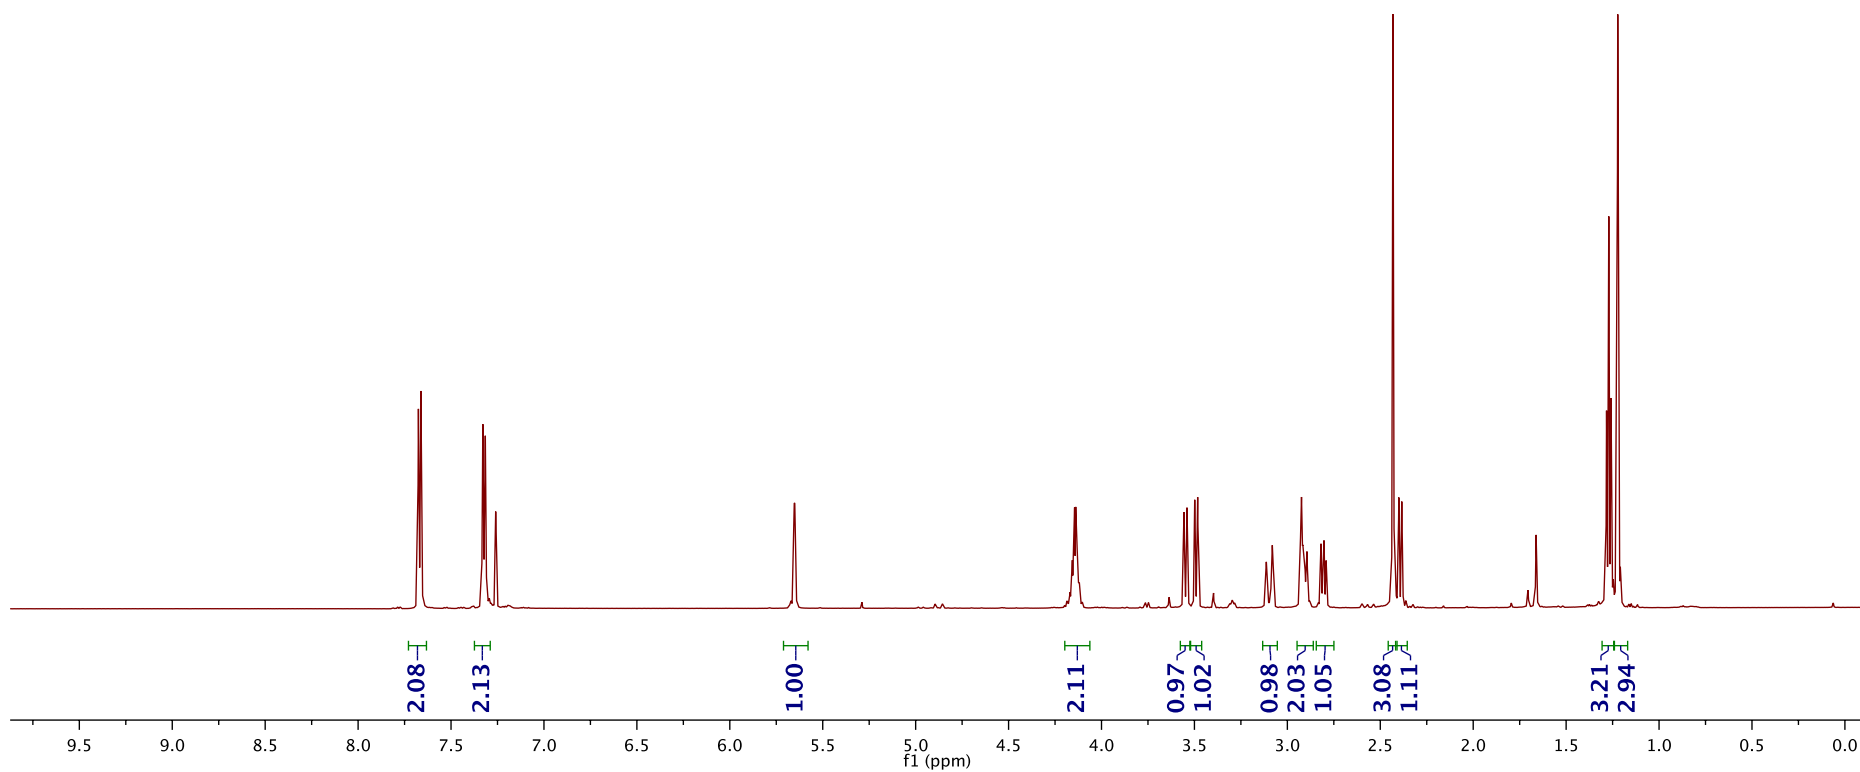

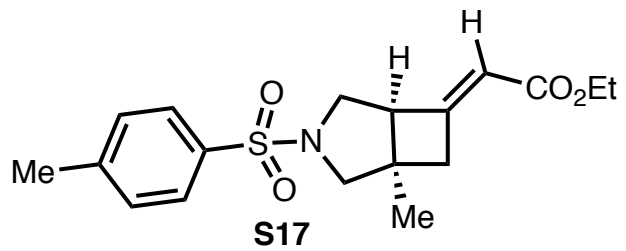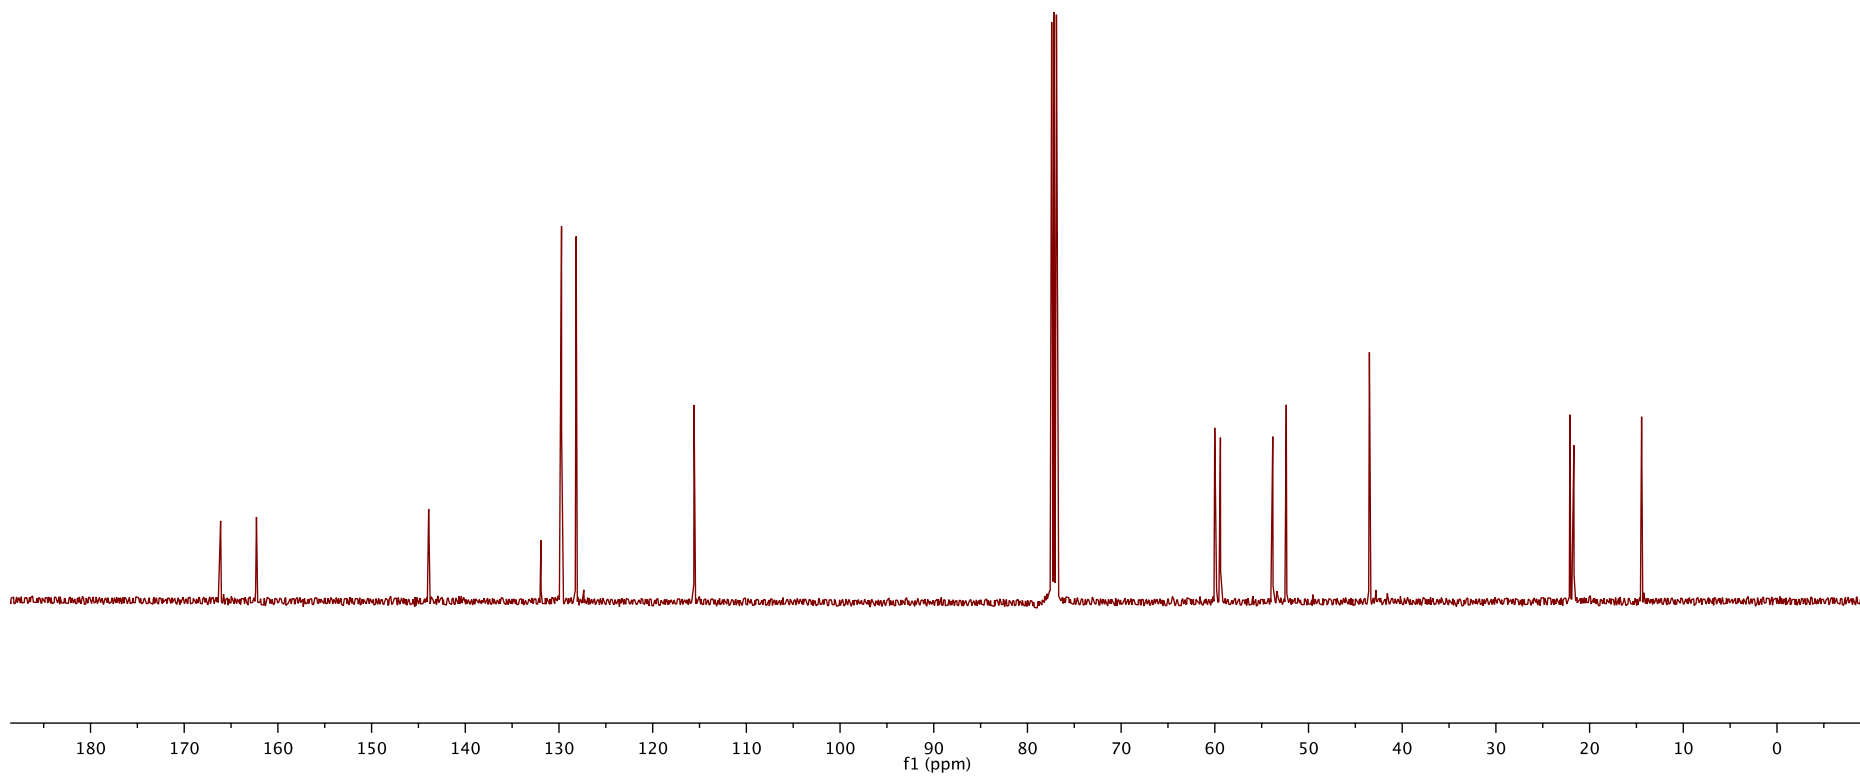

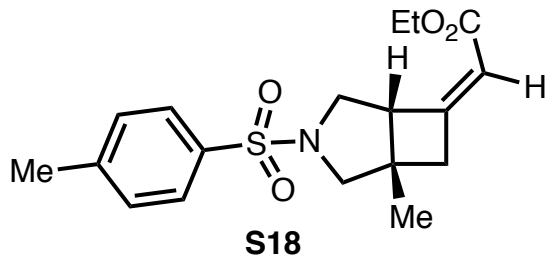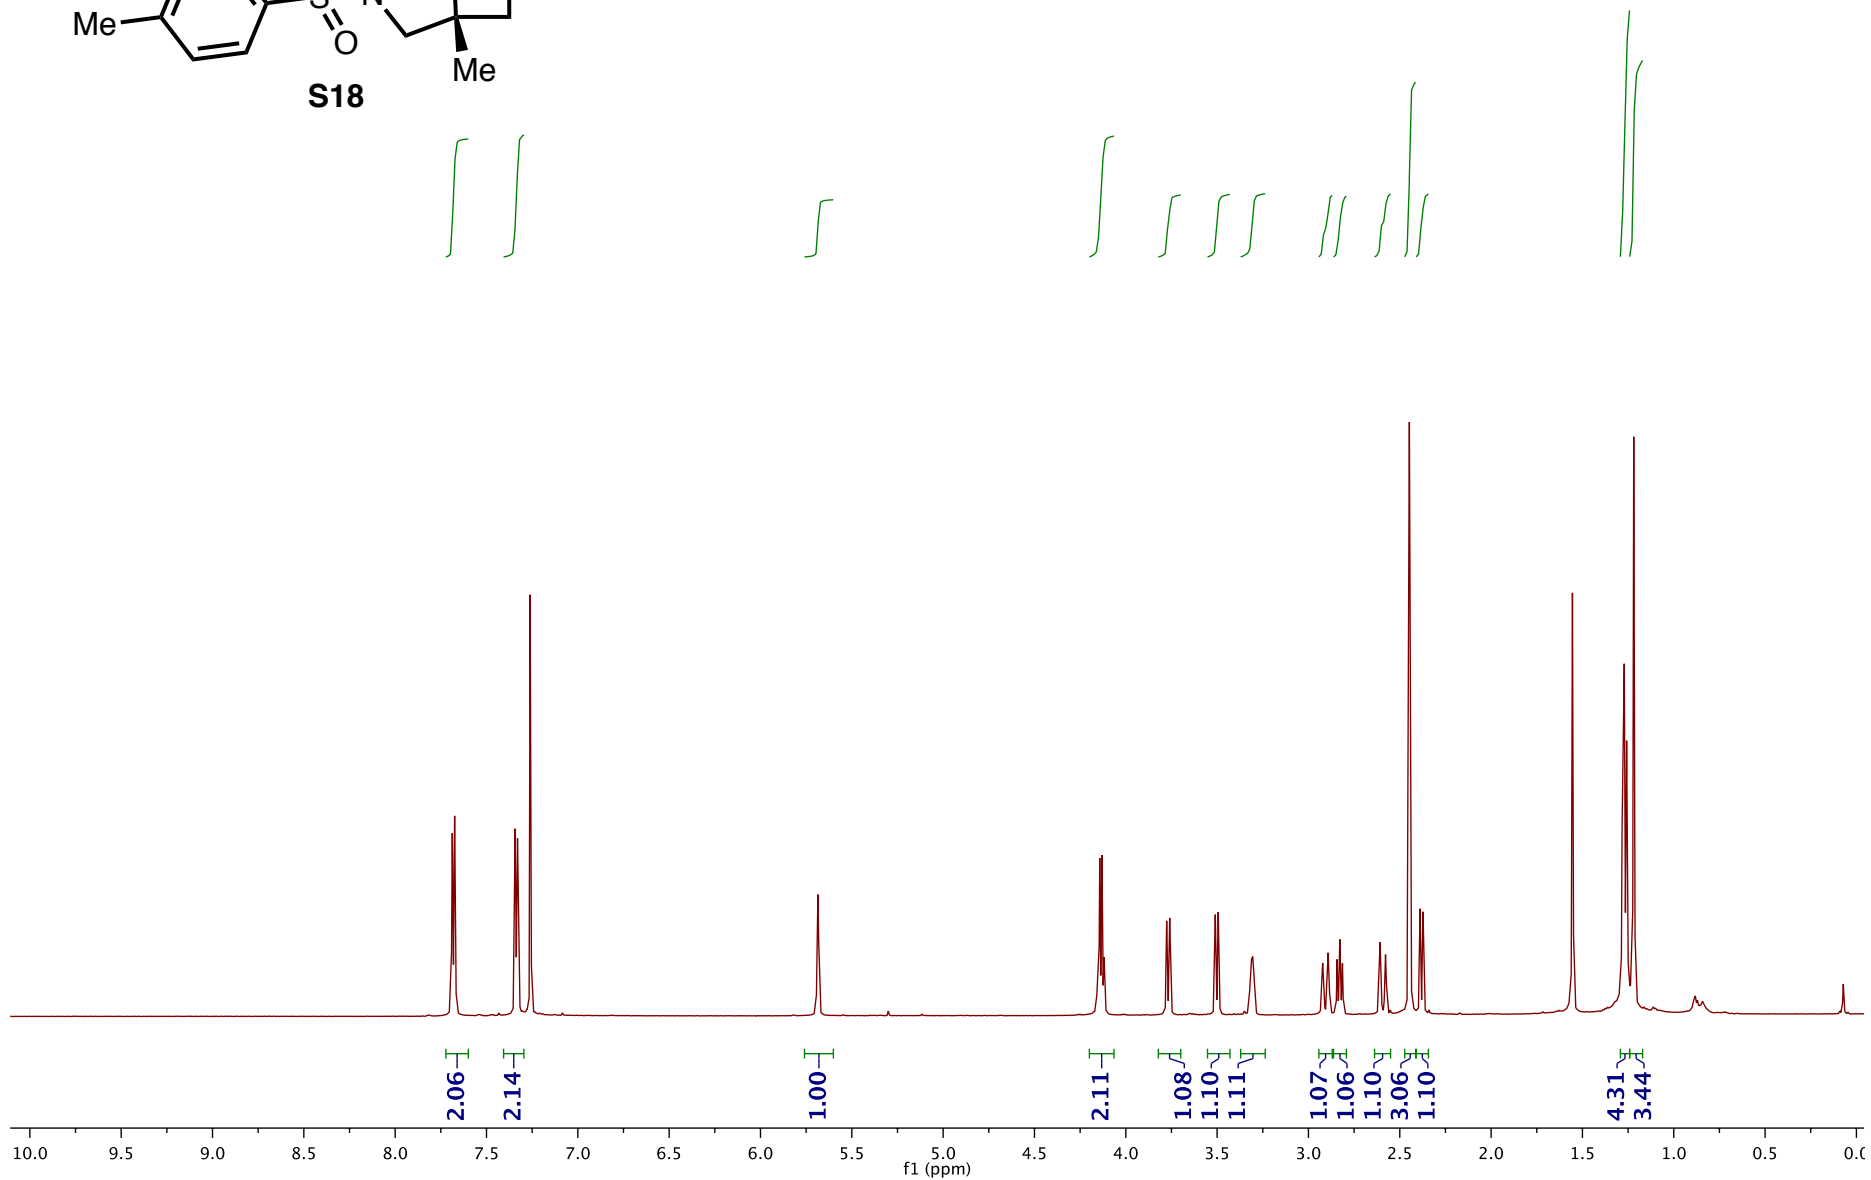

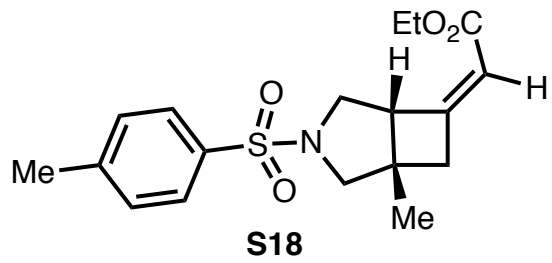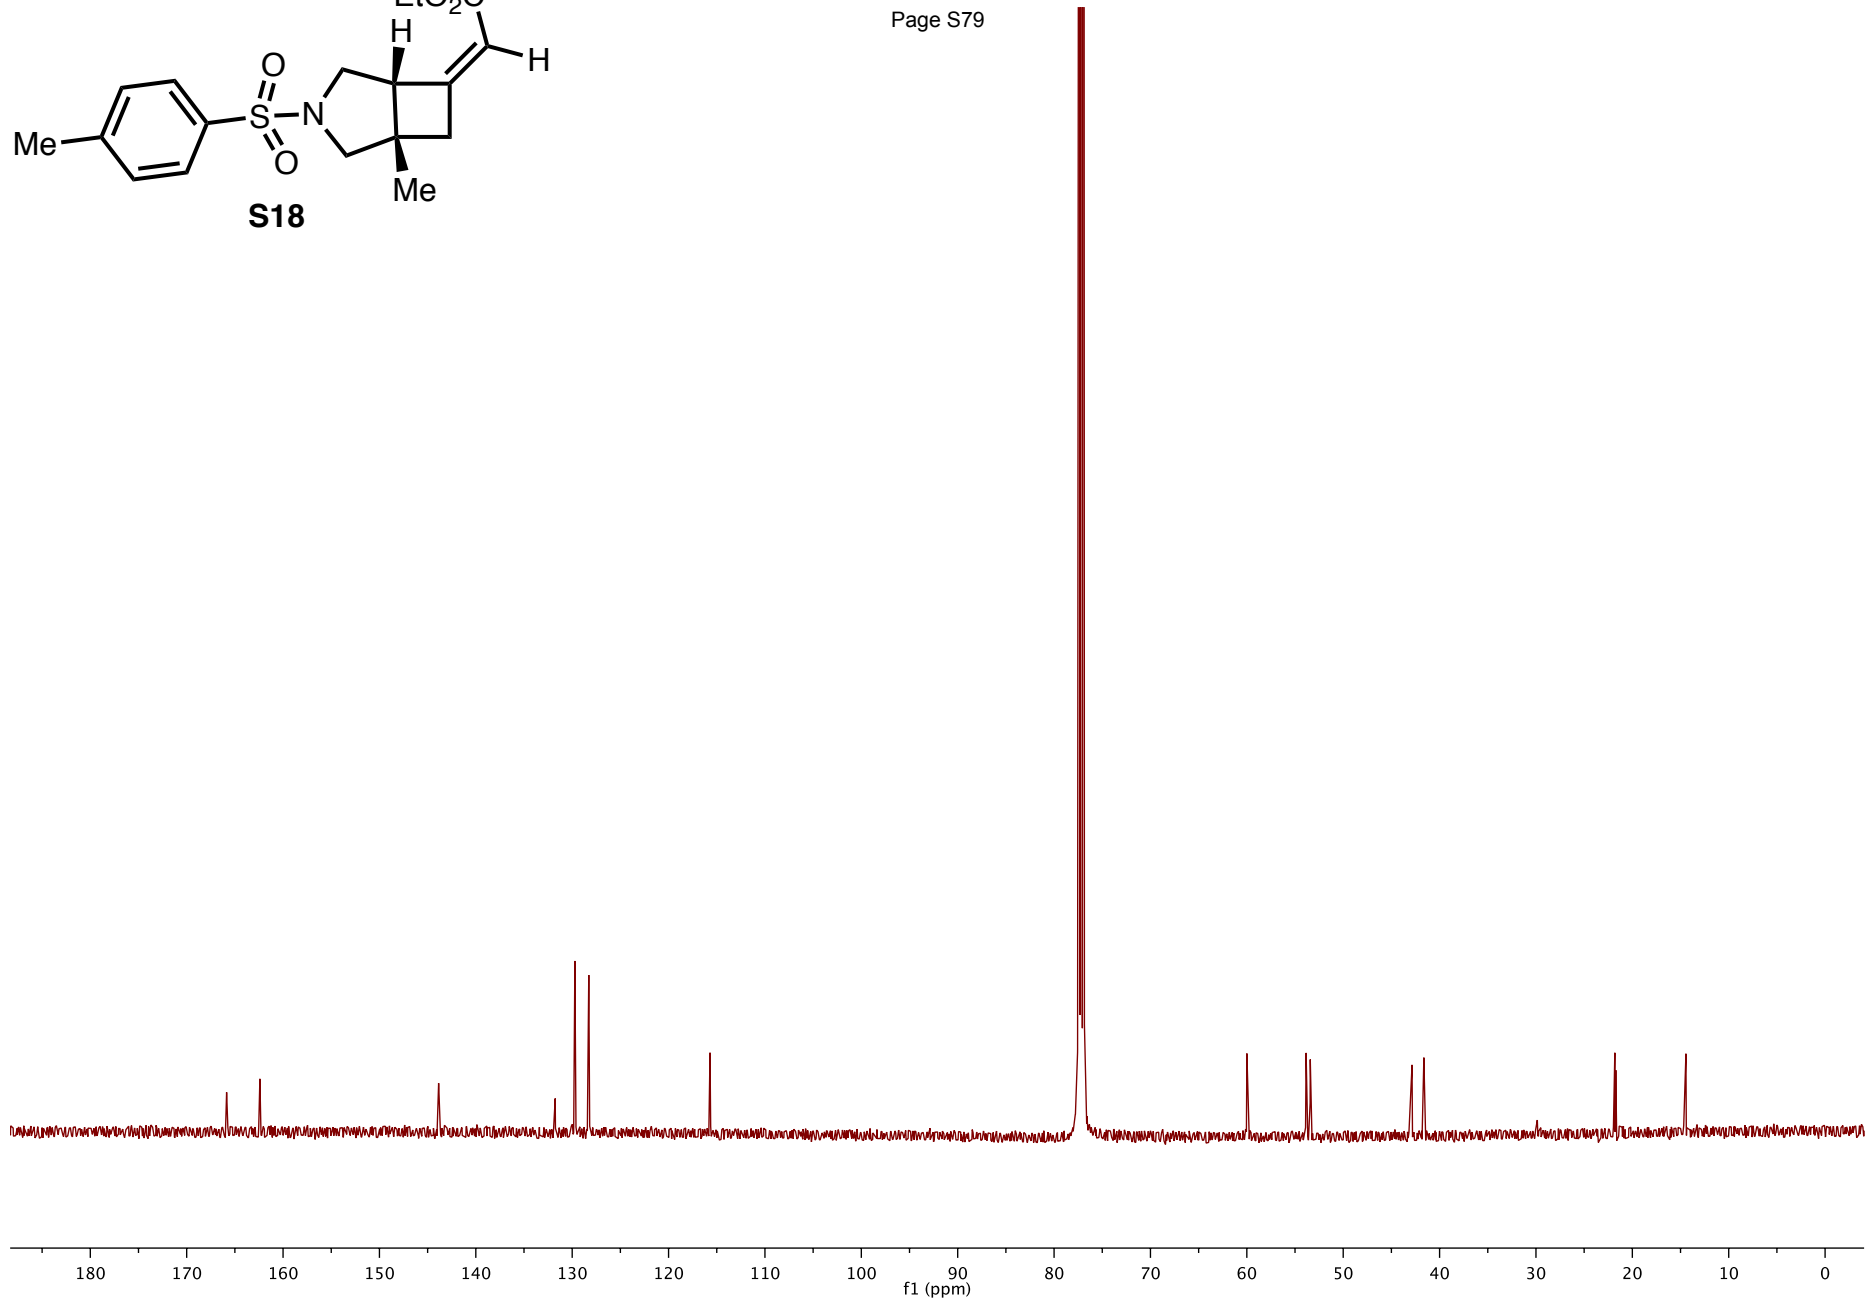

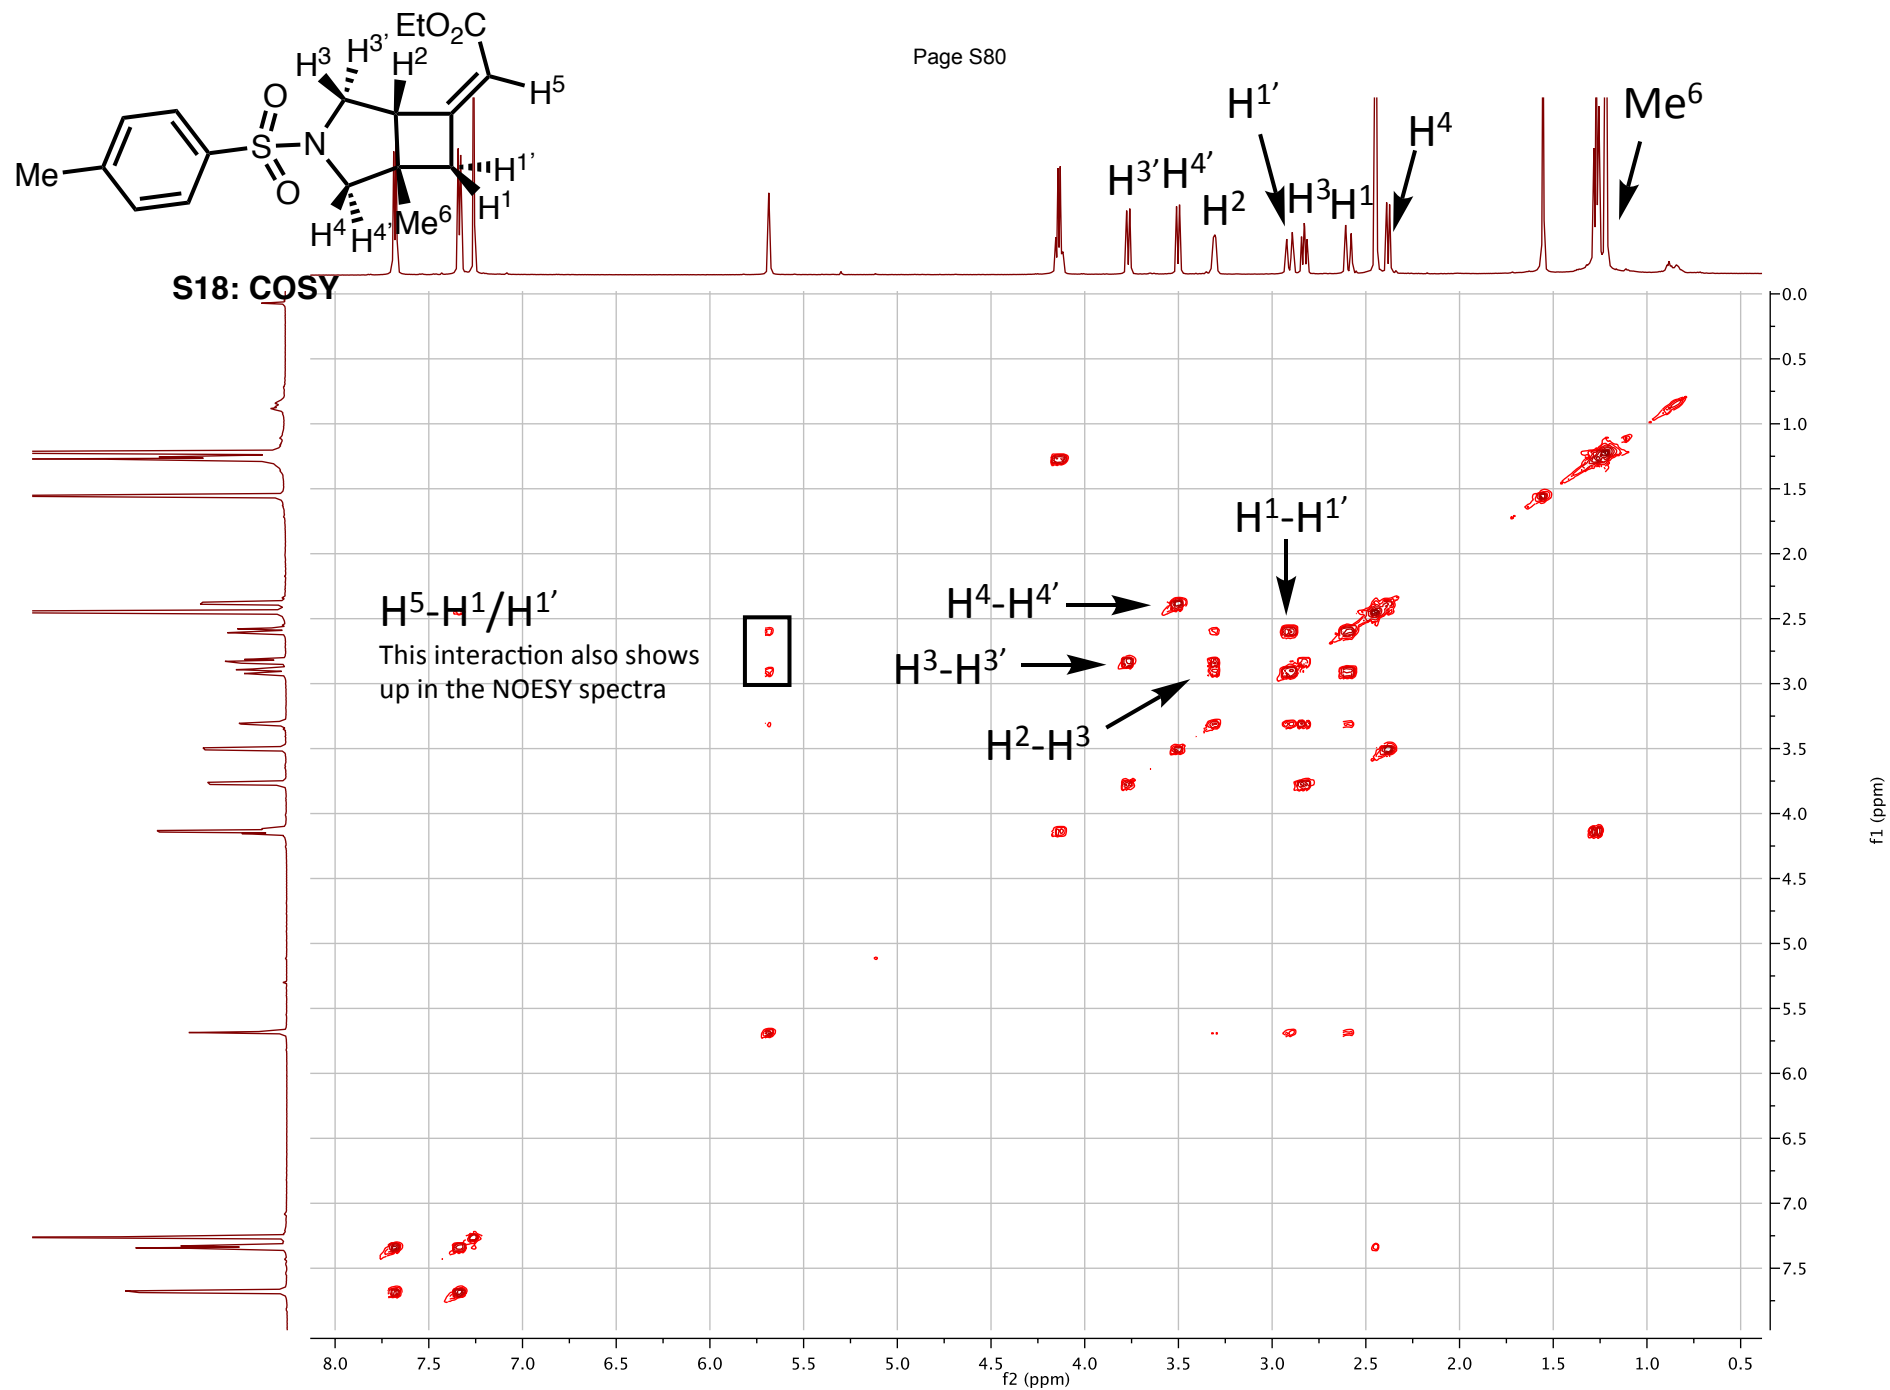



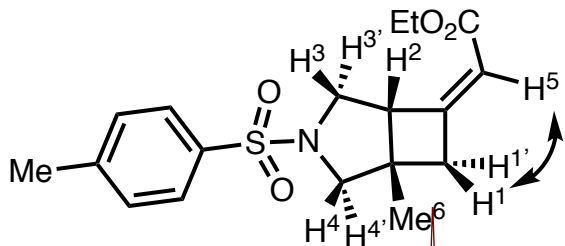

S18: NOESY

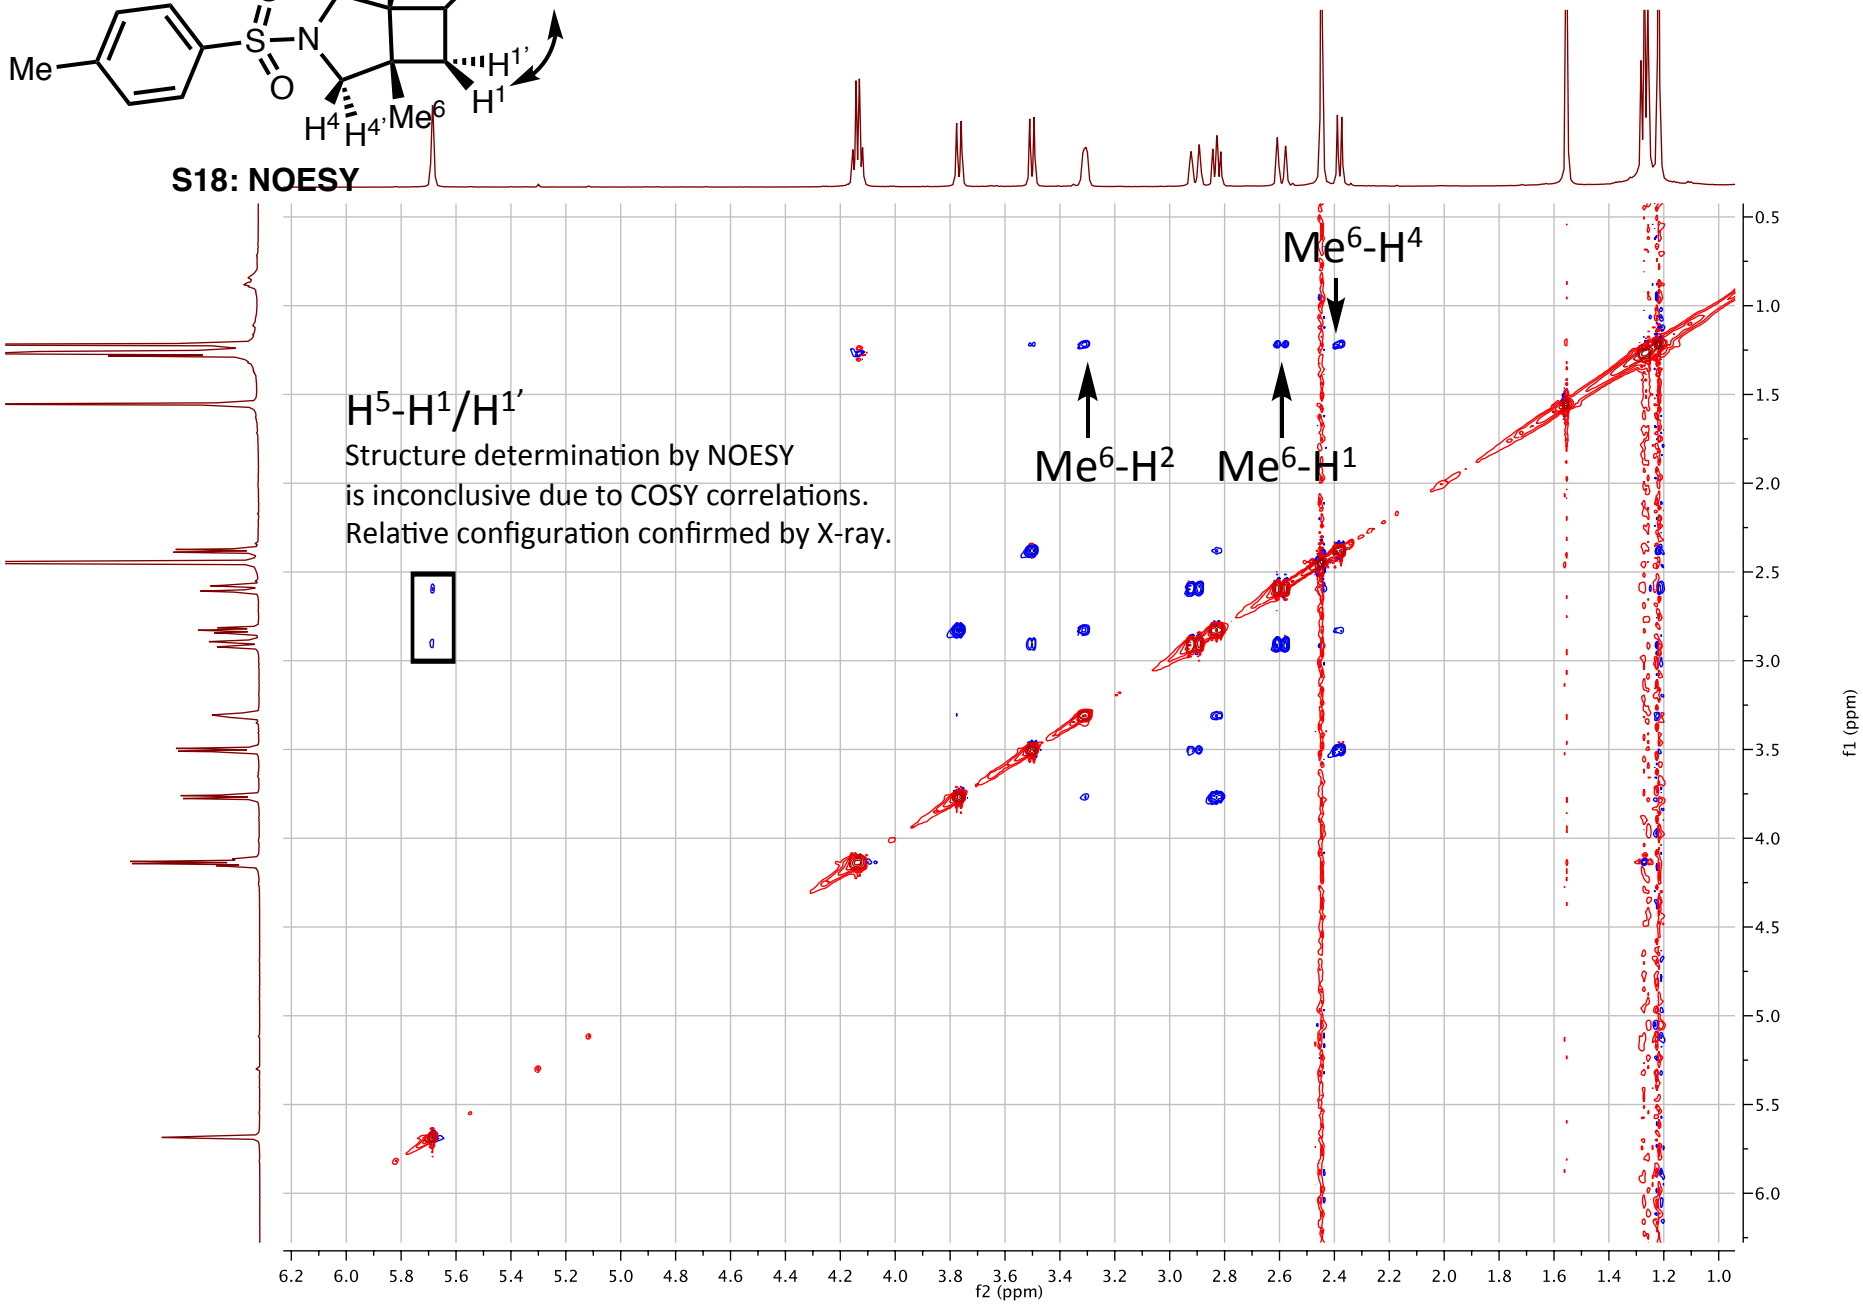

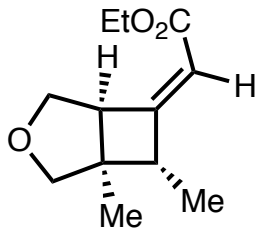

15a-b

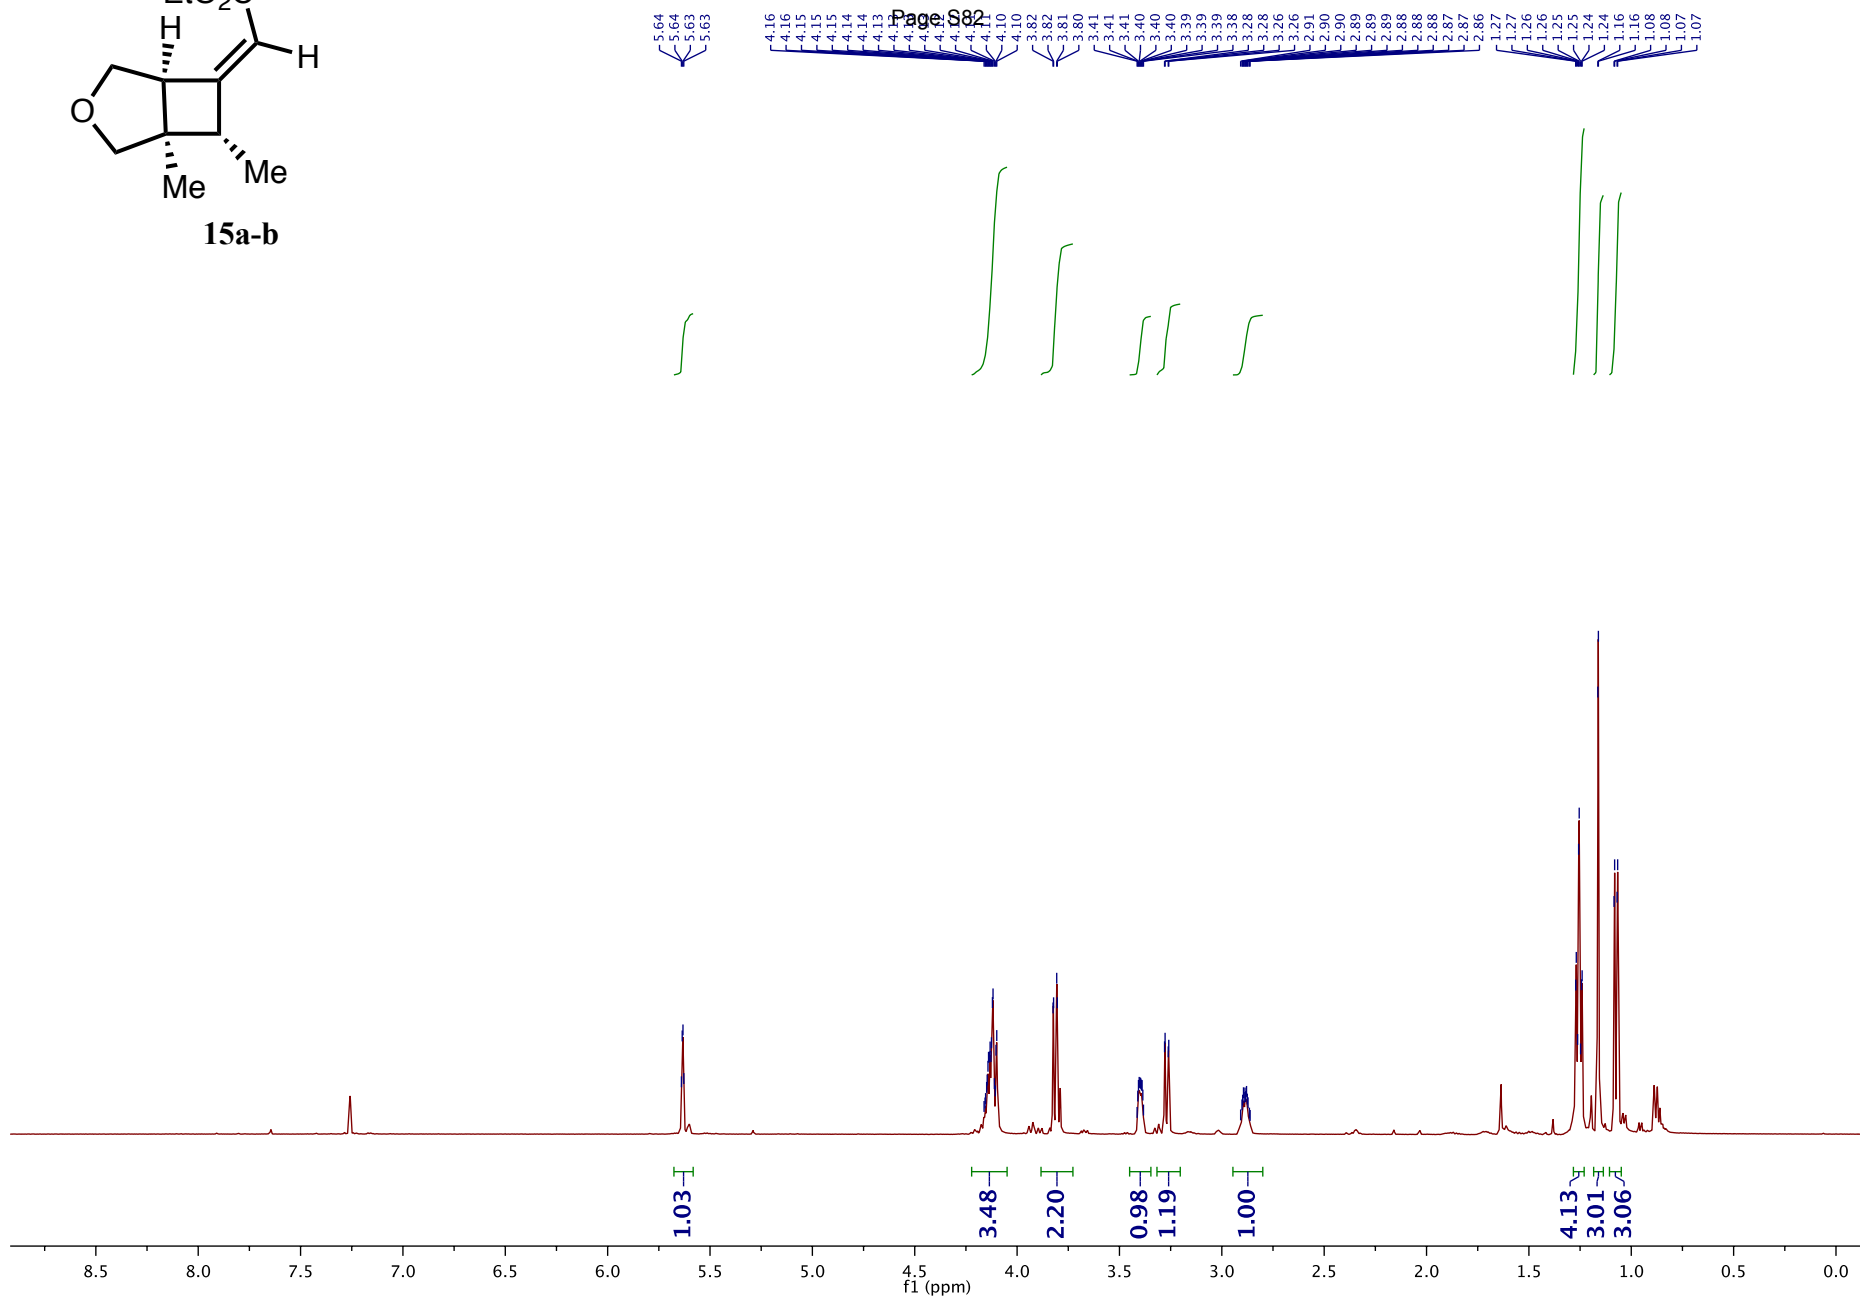

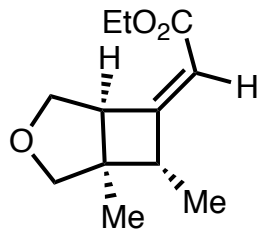

— 170.95  
— 166.43

Page S83

— 112.88

79.85  
77.42  
77.36  
77.16  
76.91  
73.36

— 59.83  
— 54.96

— 47.04  
— 44.37

14.44  
14.27  
12.96

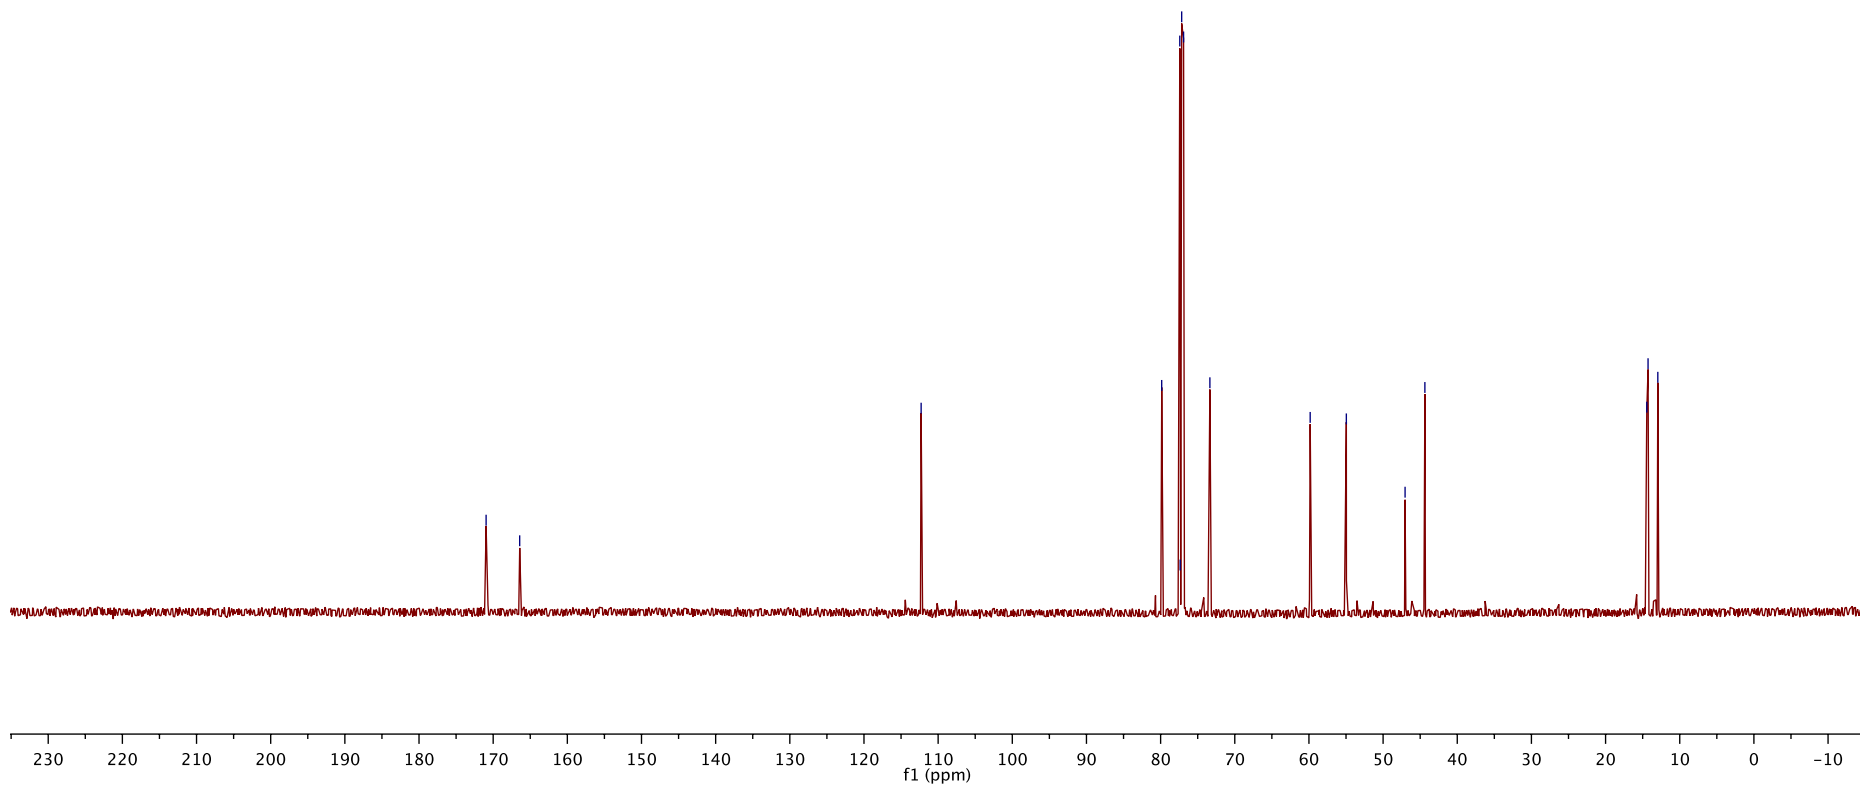

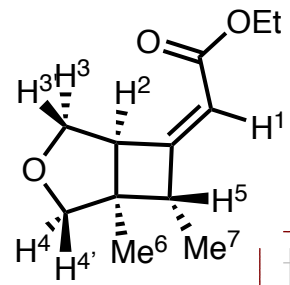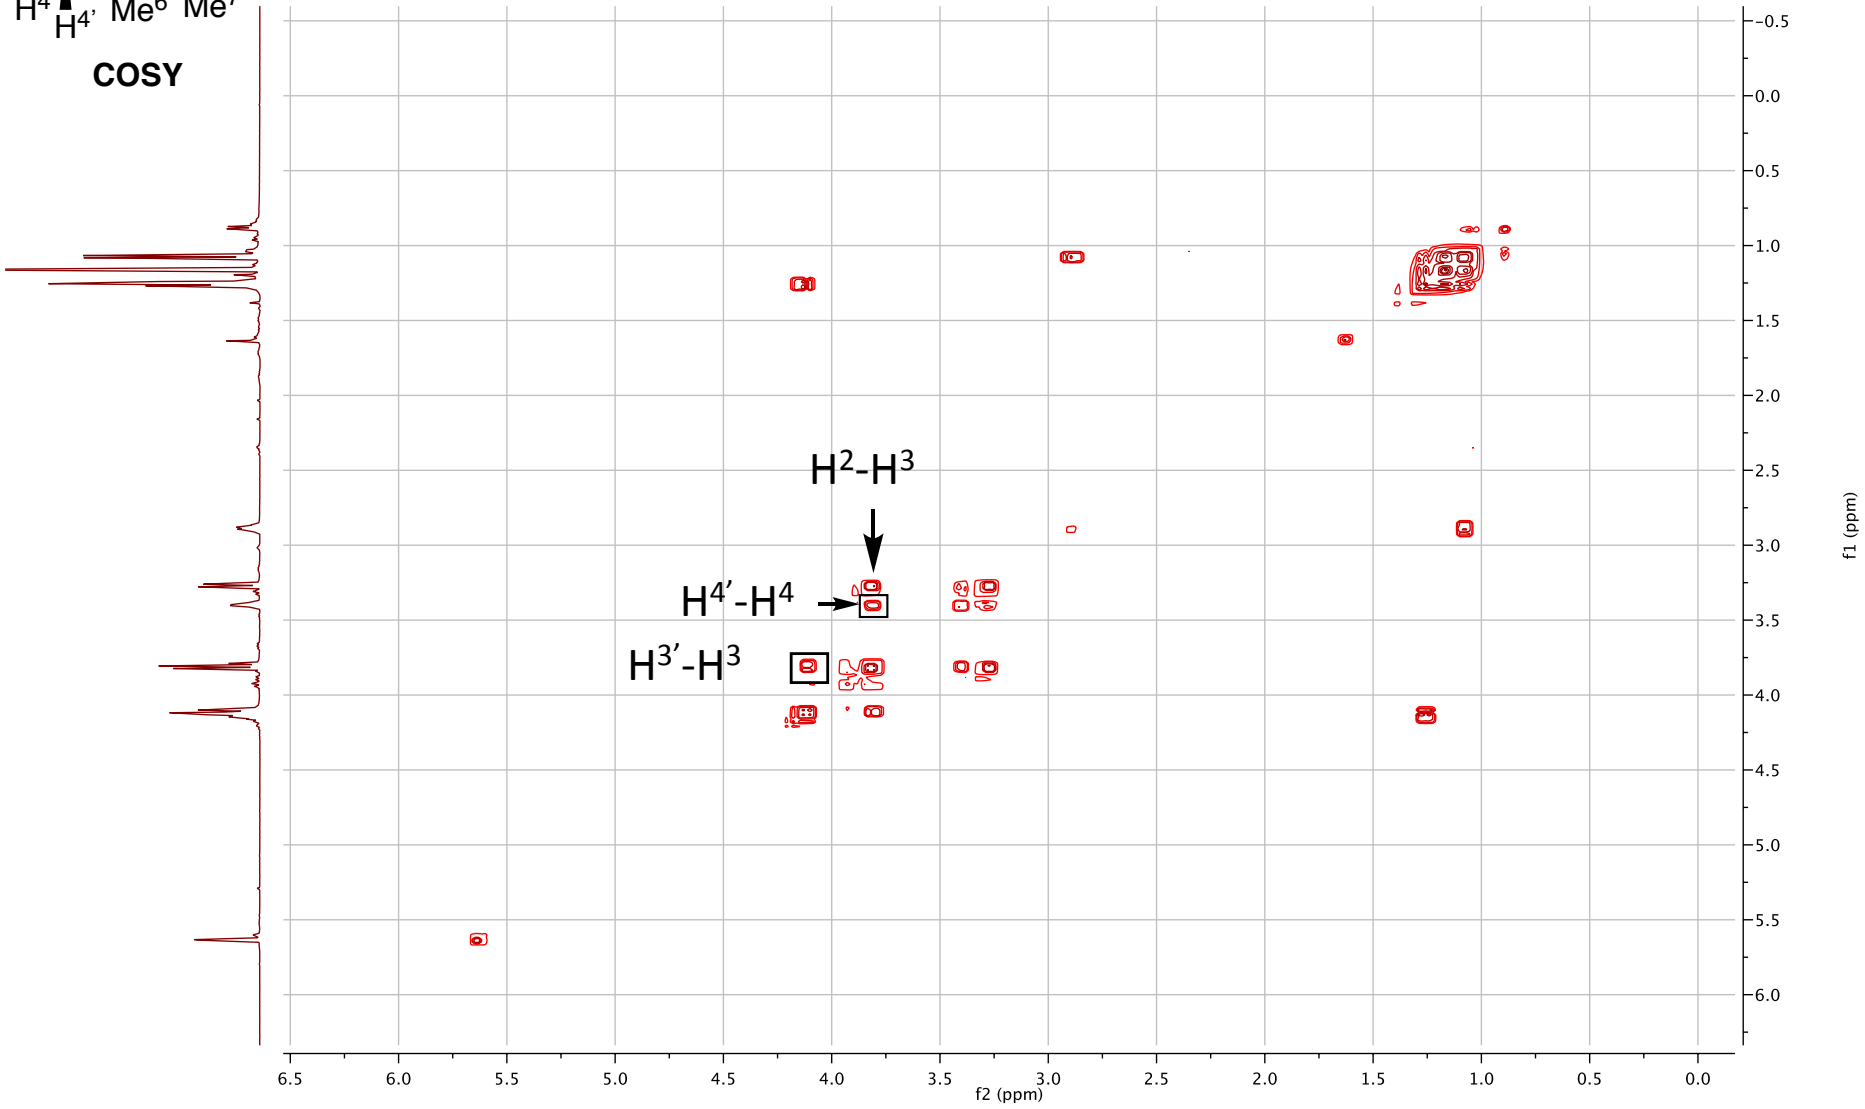

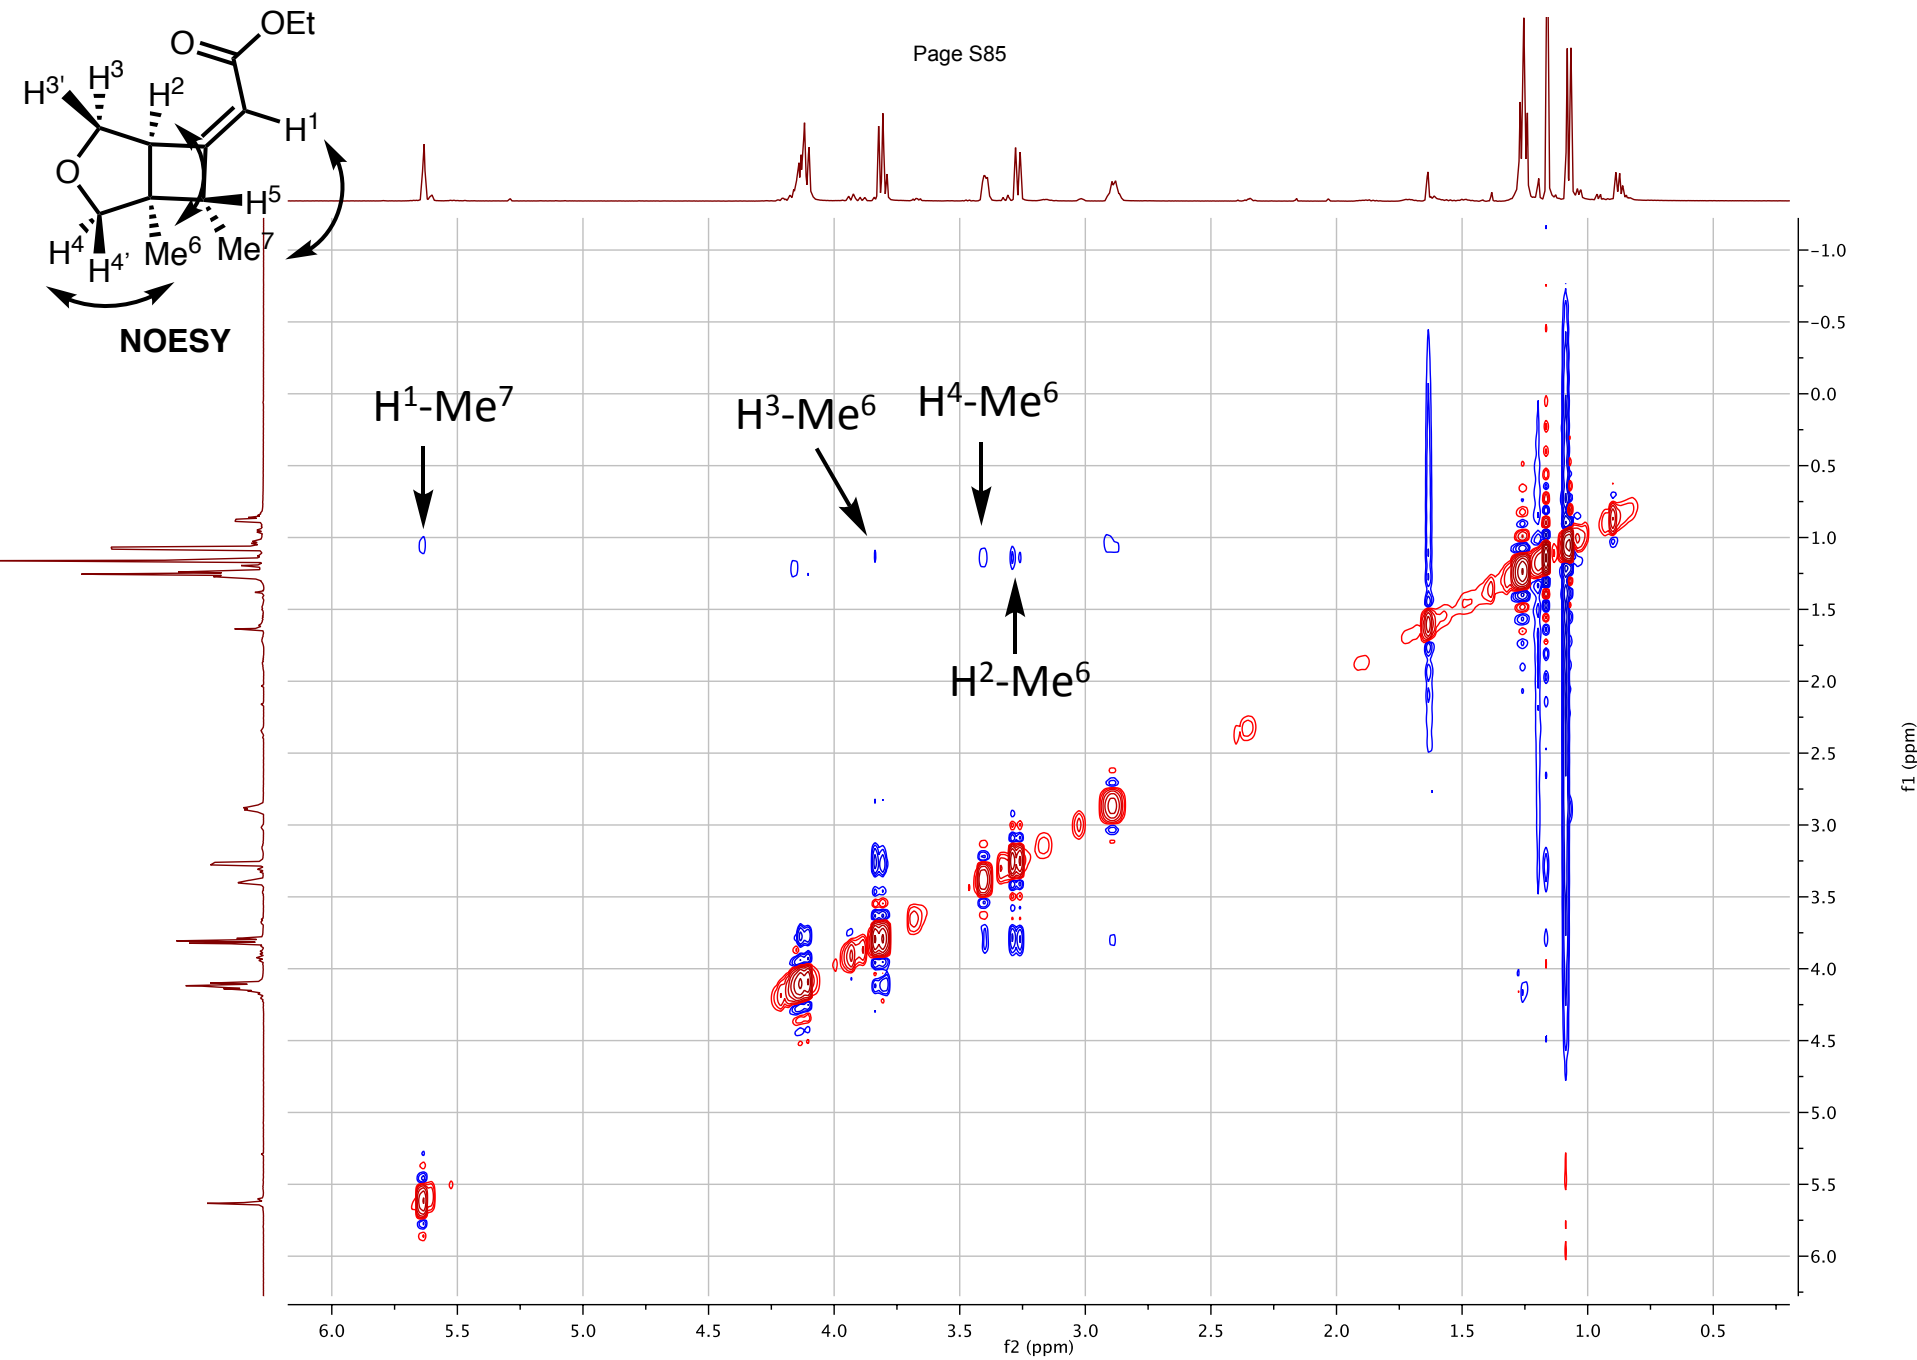

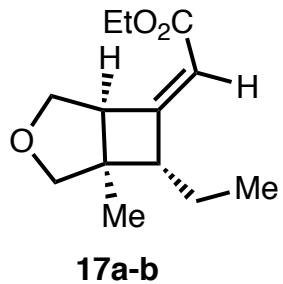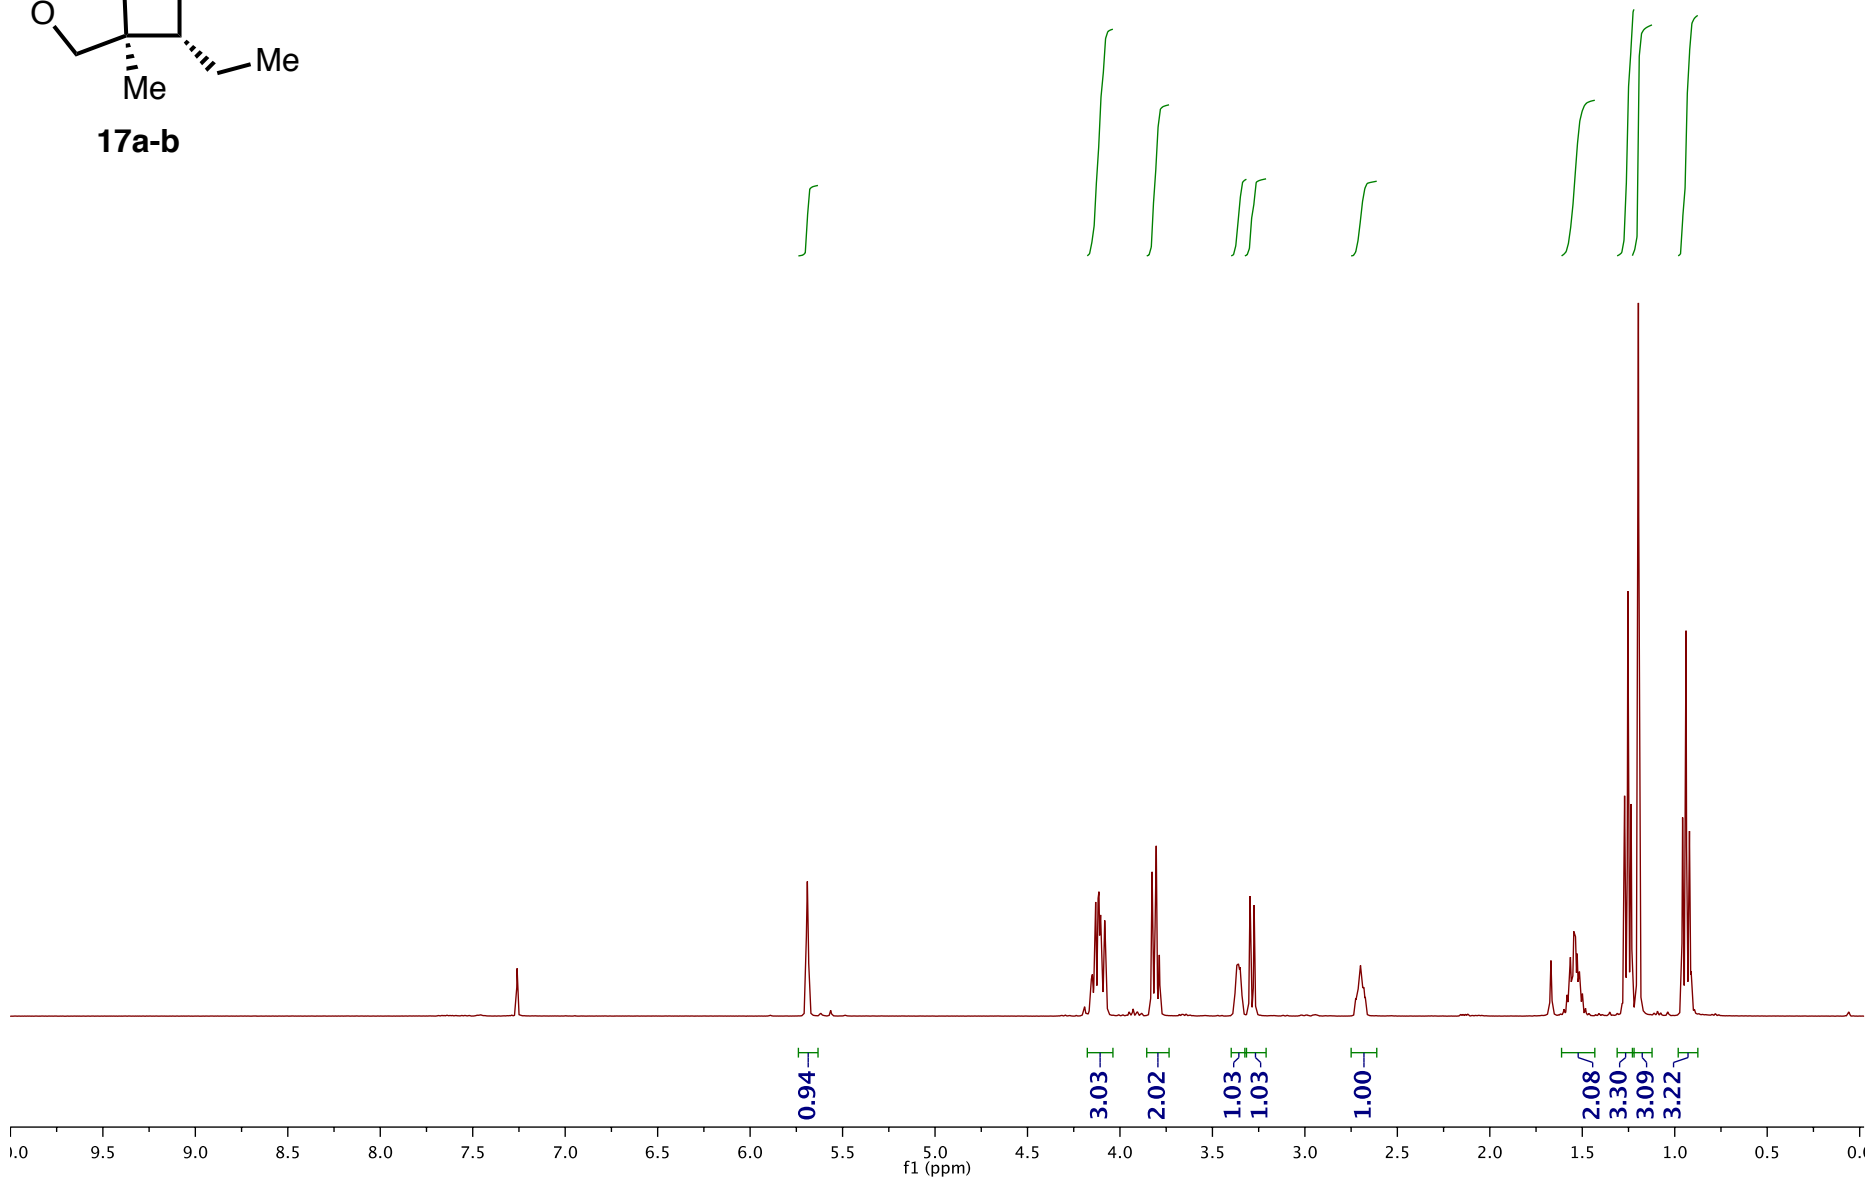

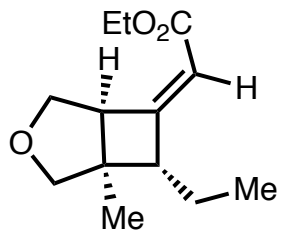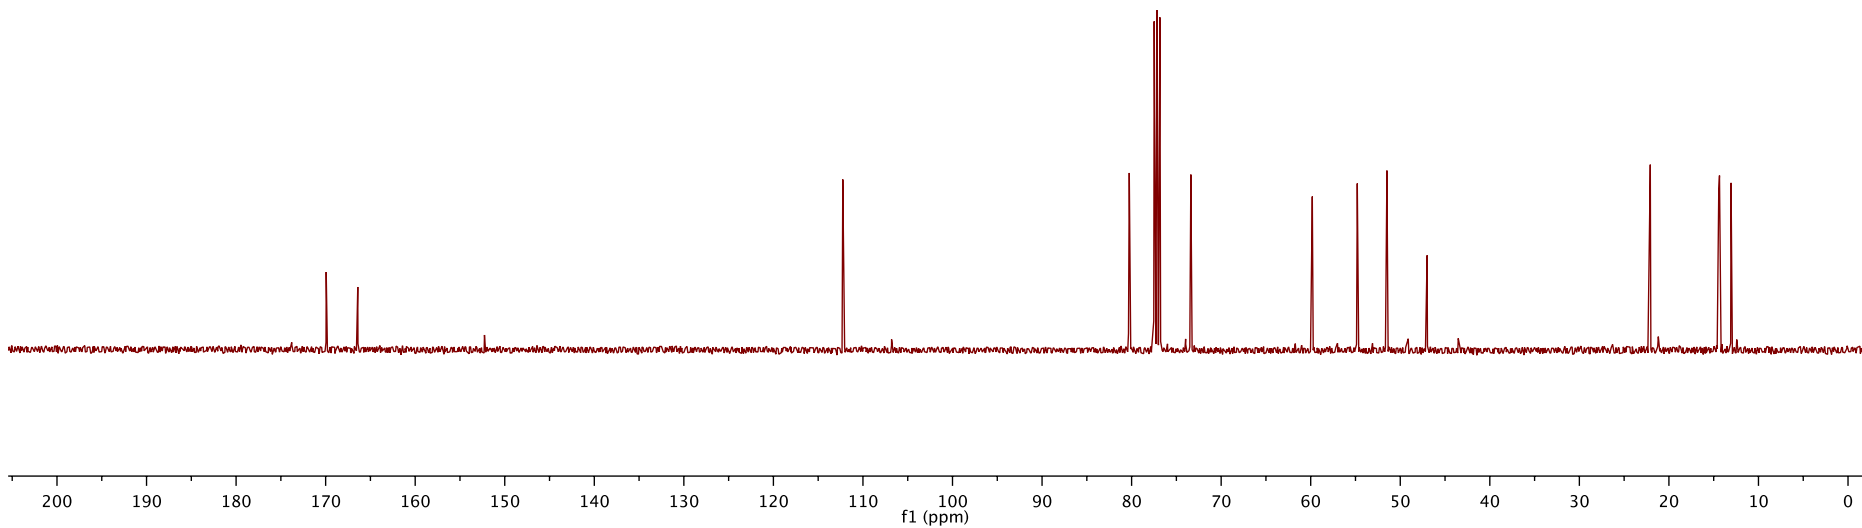

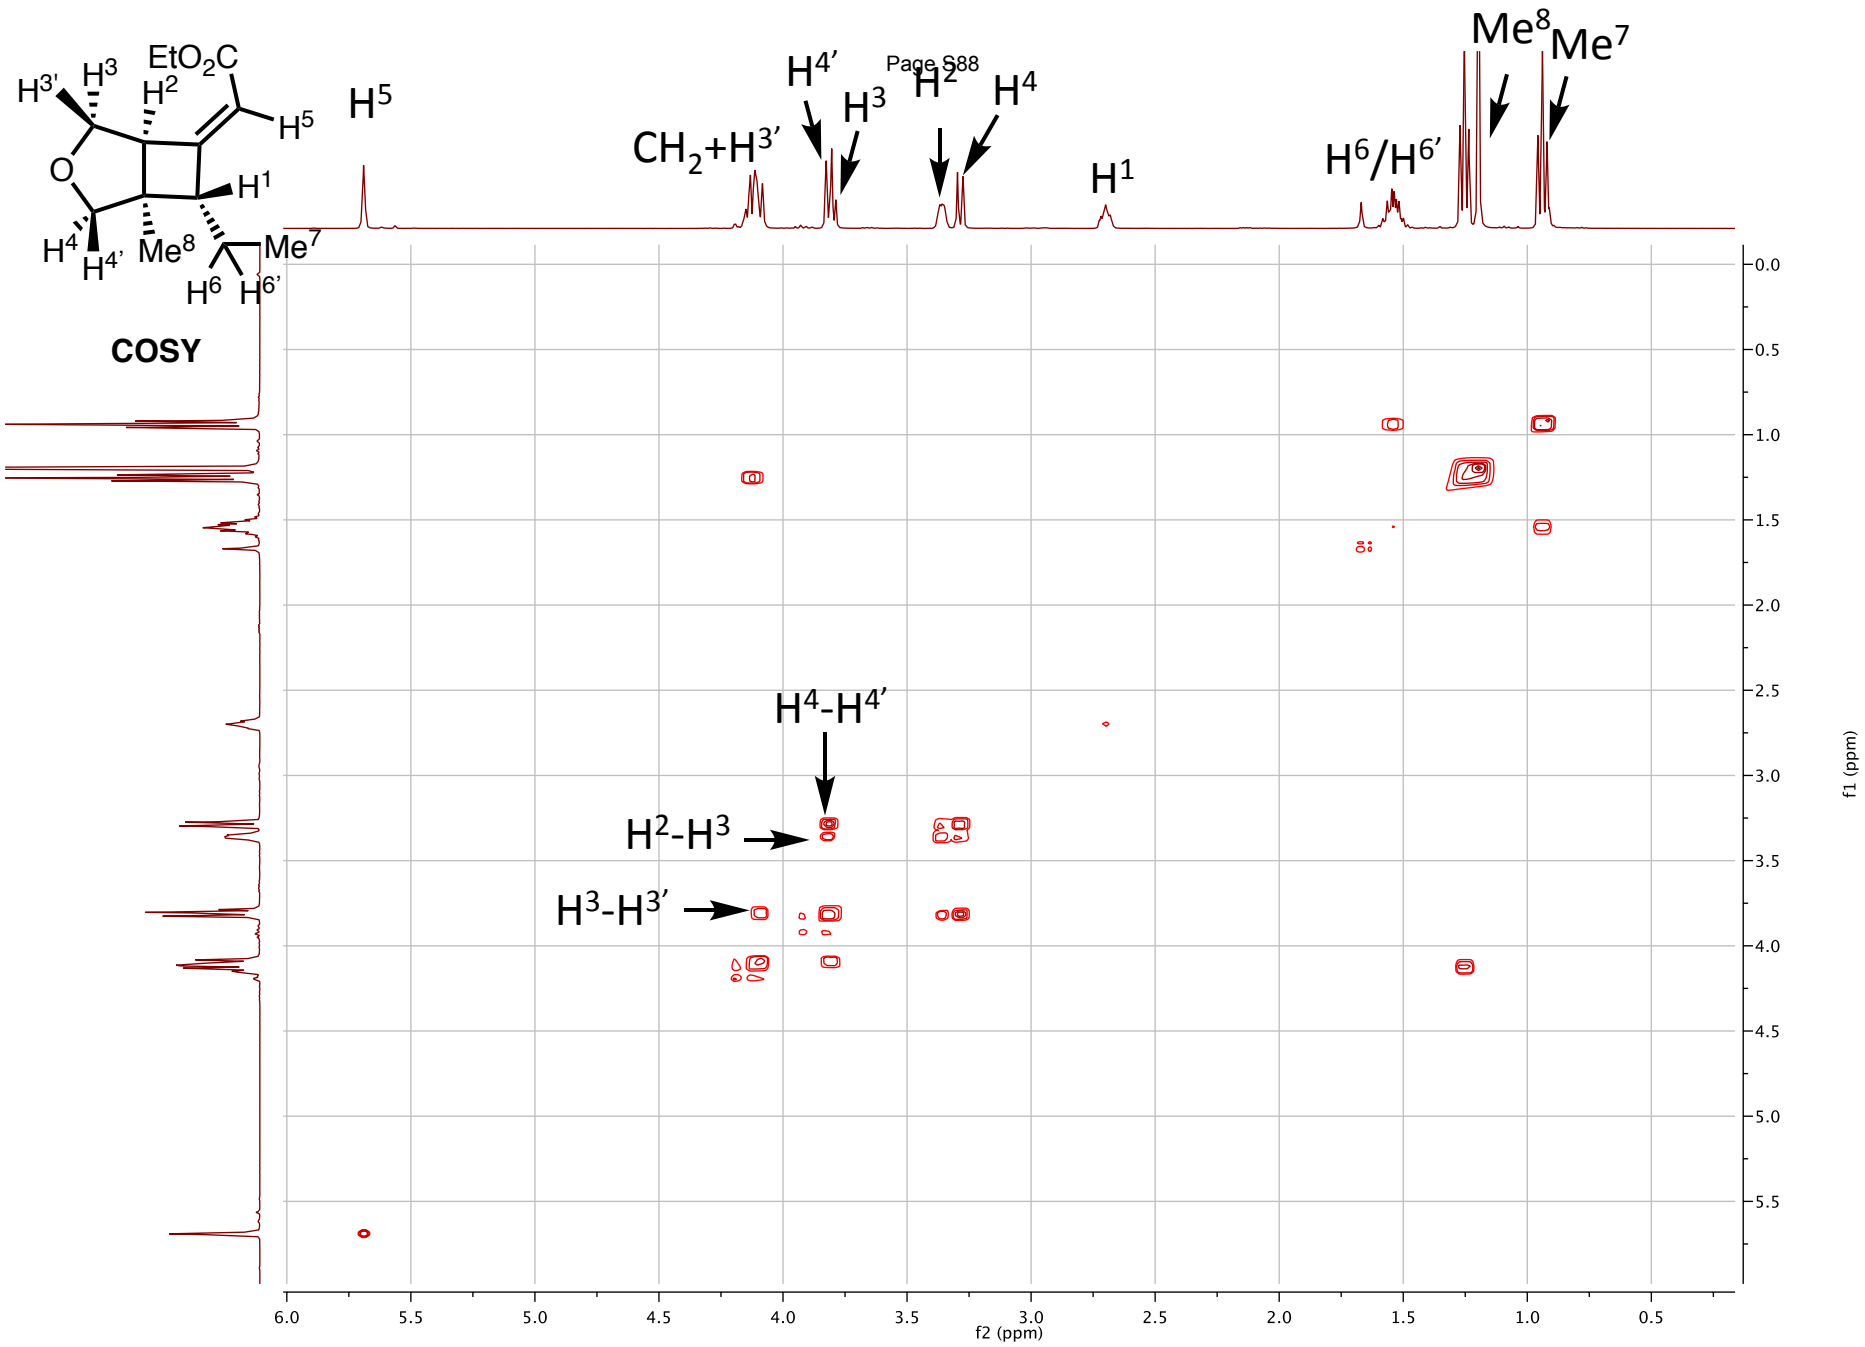



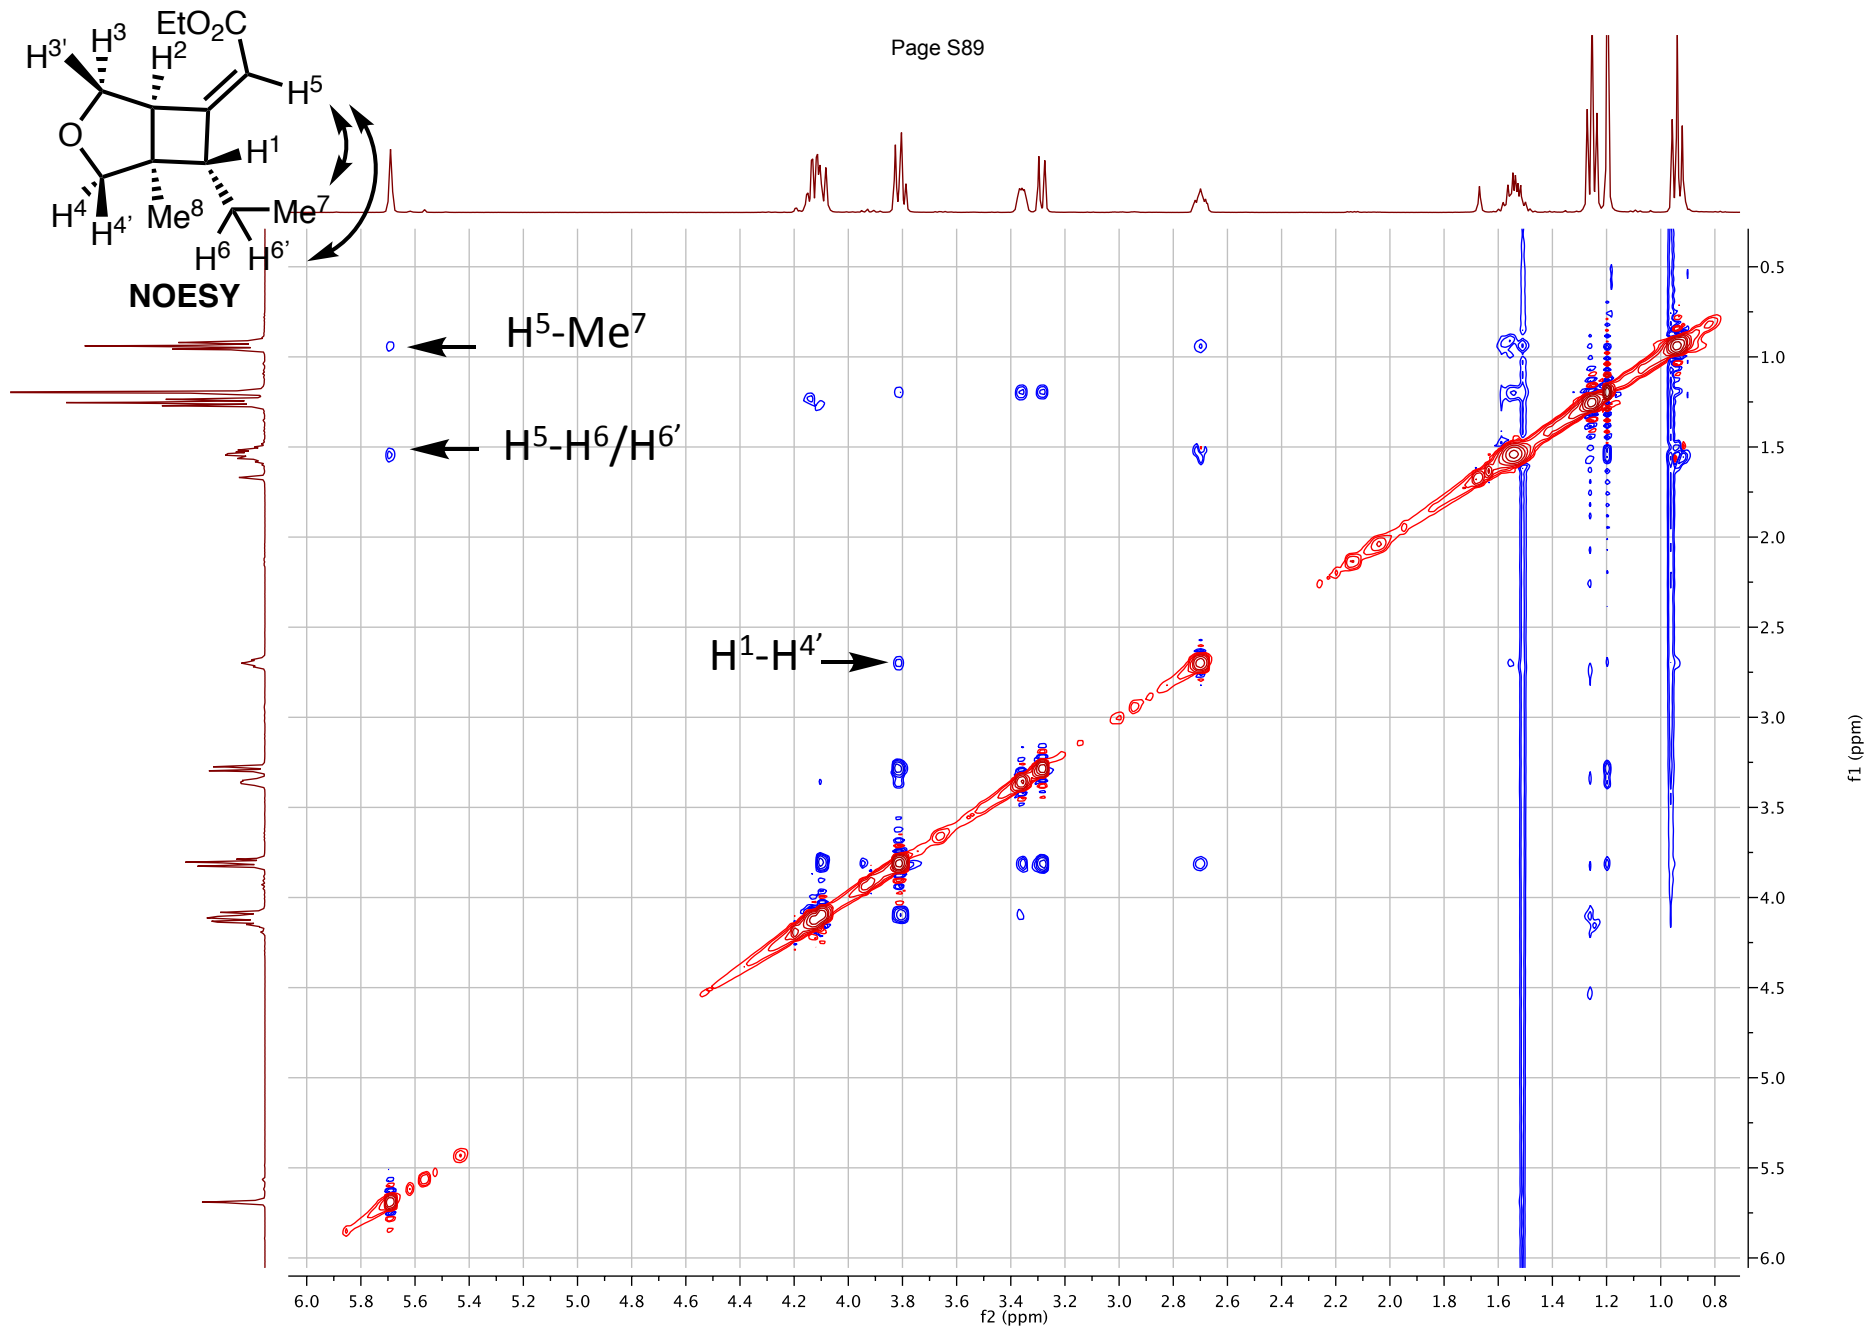

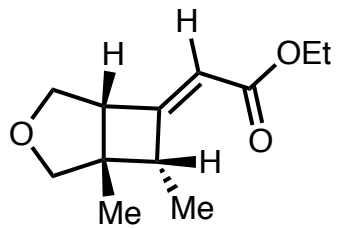

19a-b

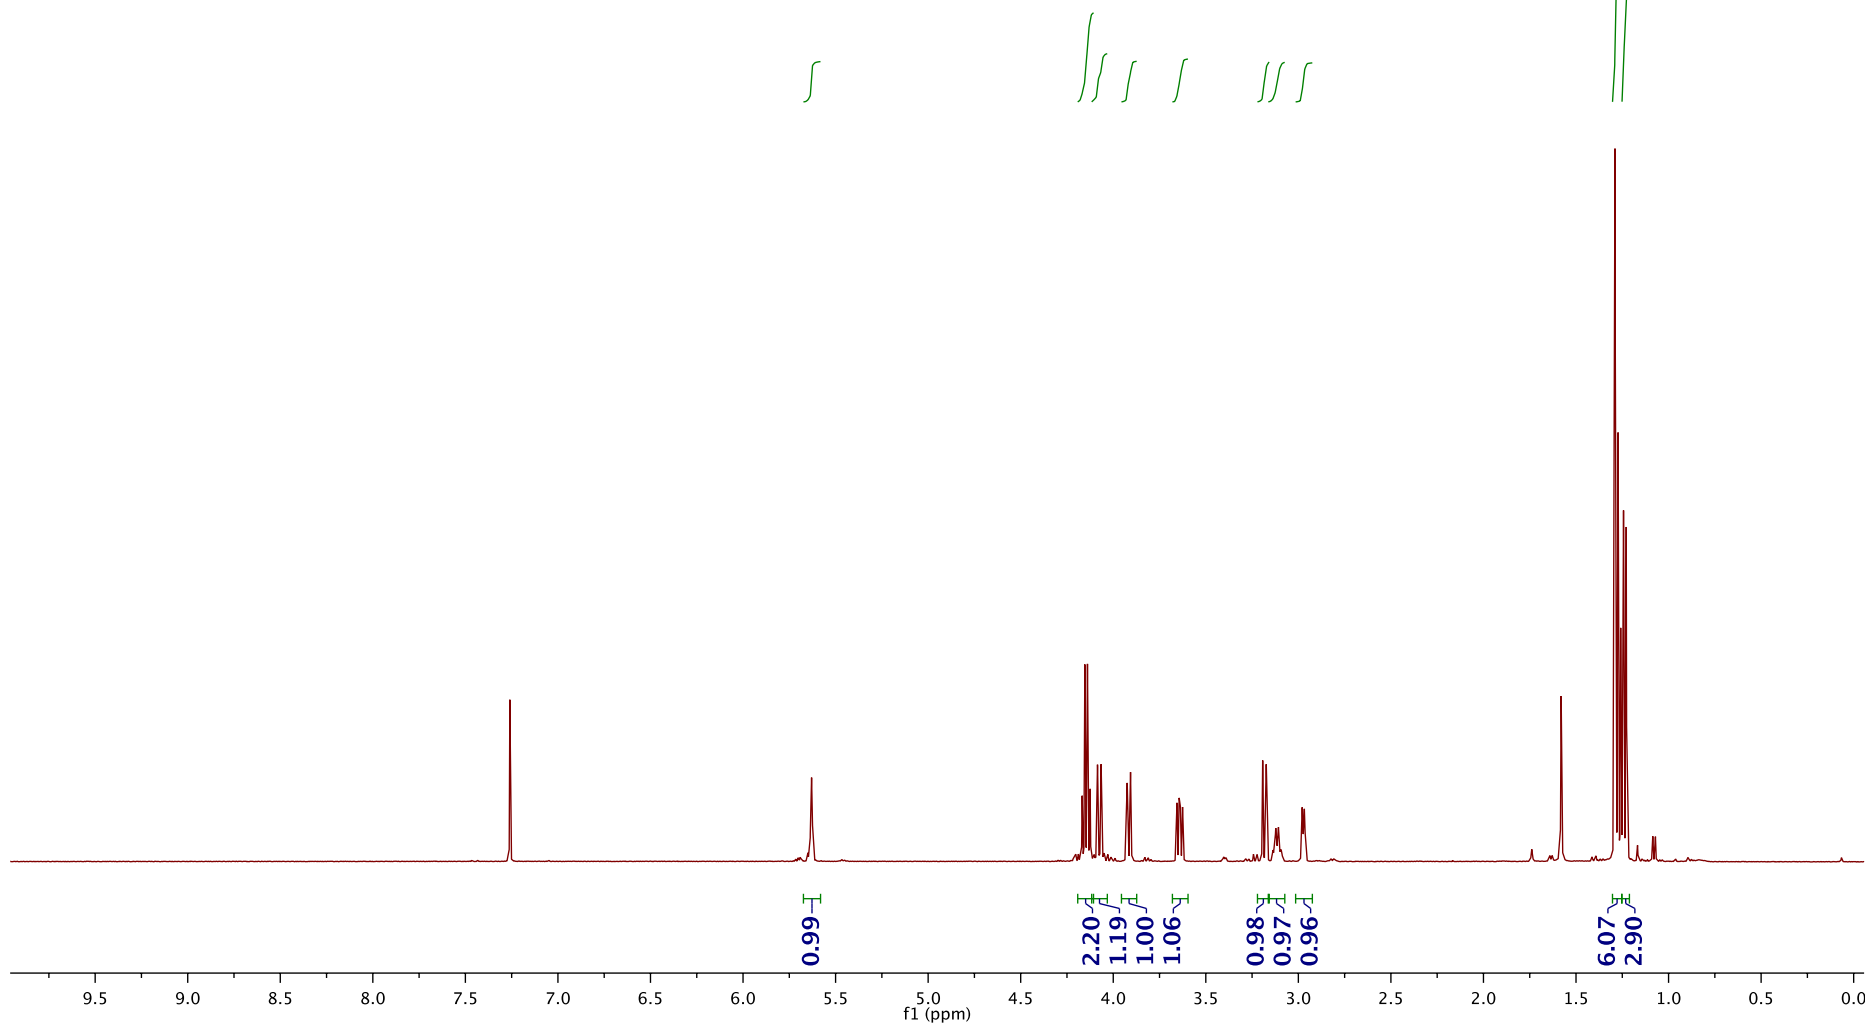

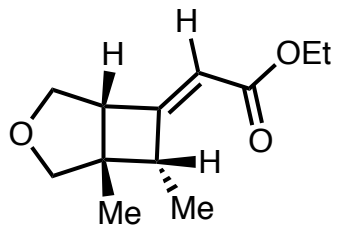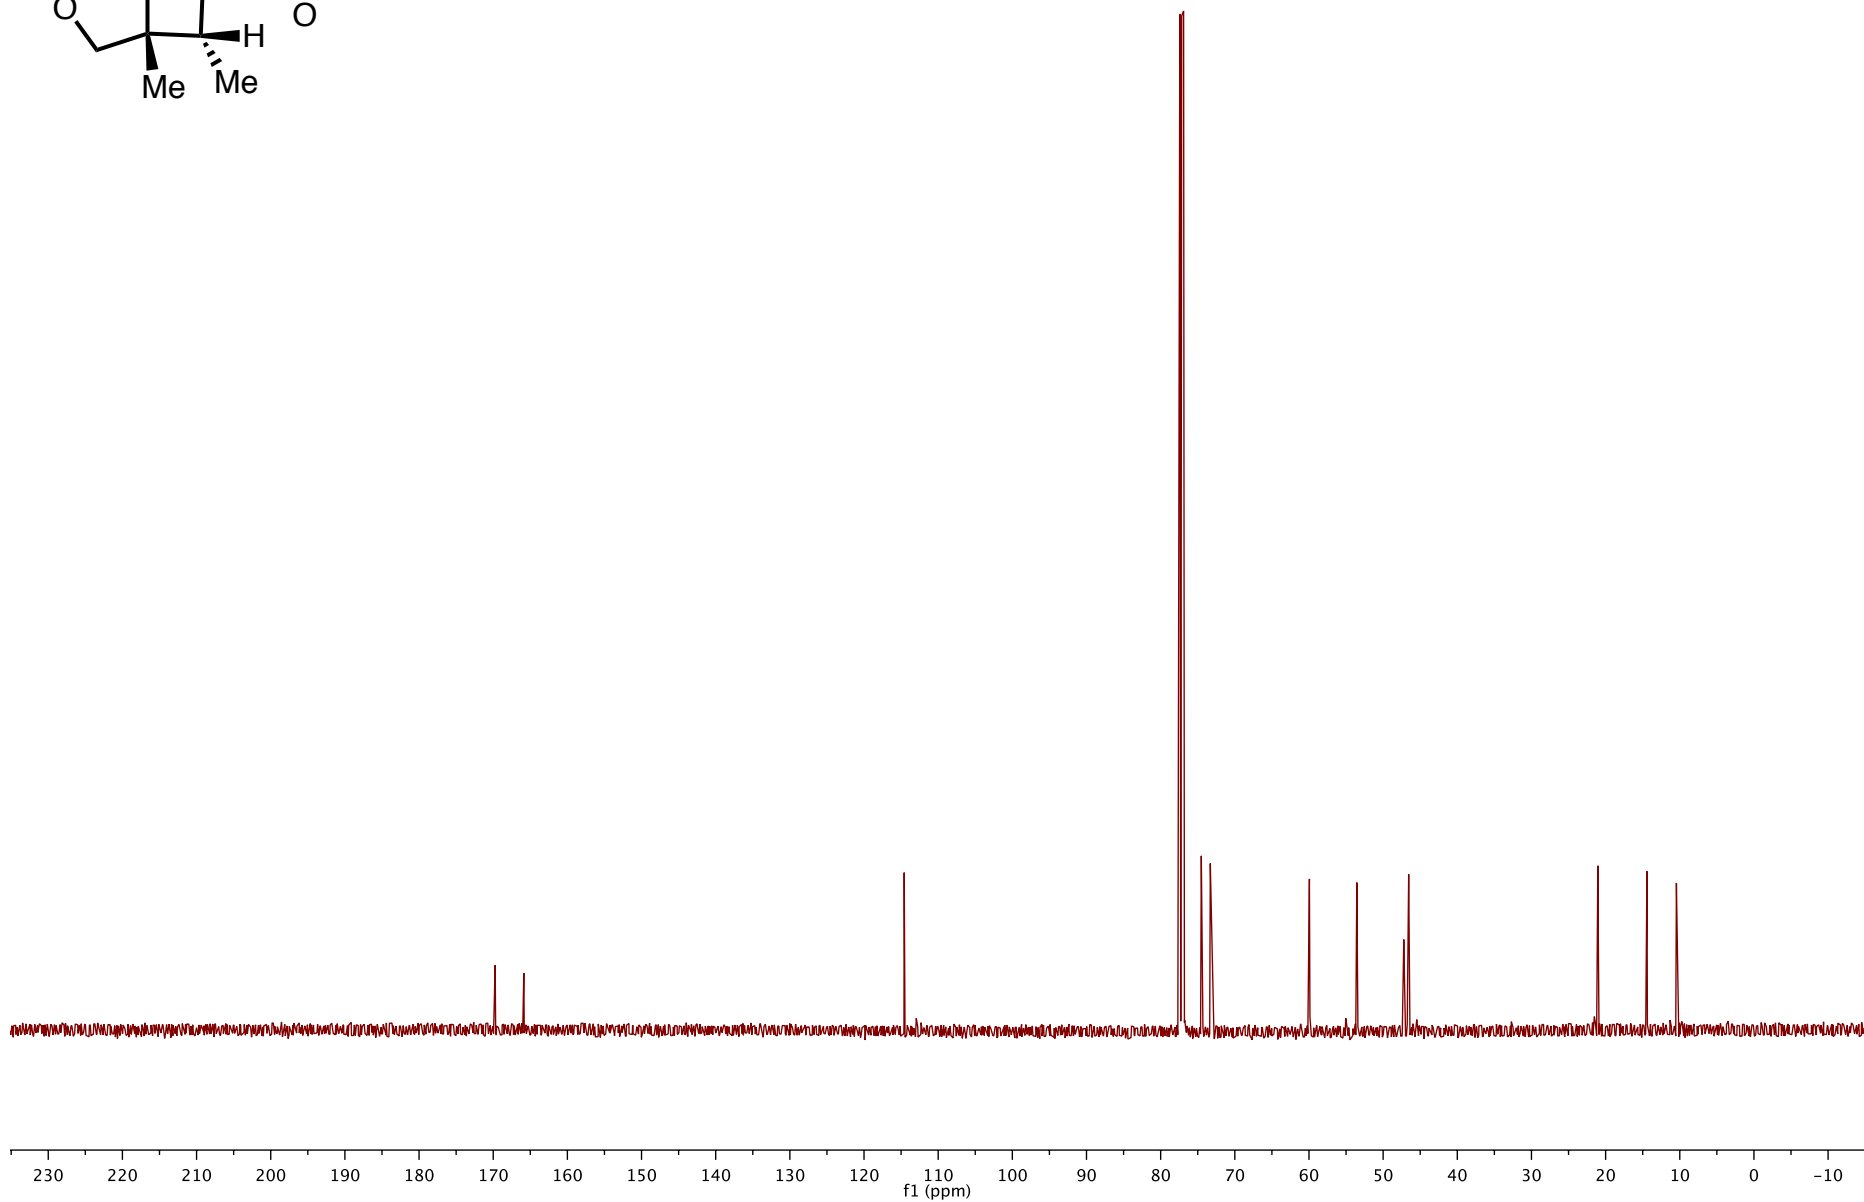

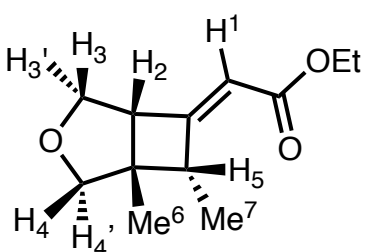

COSY

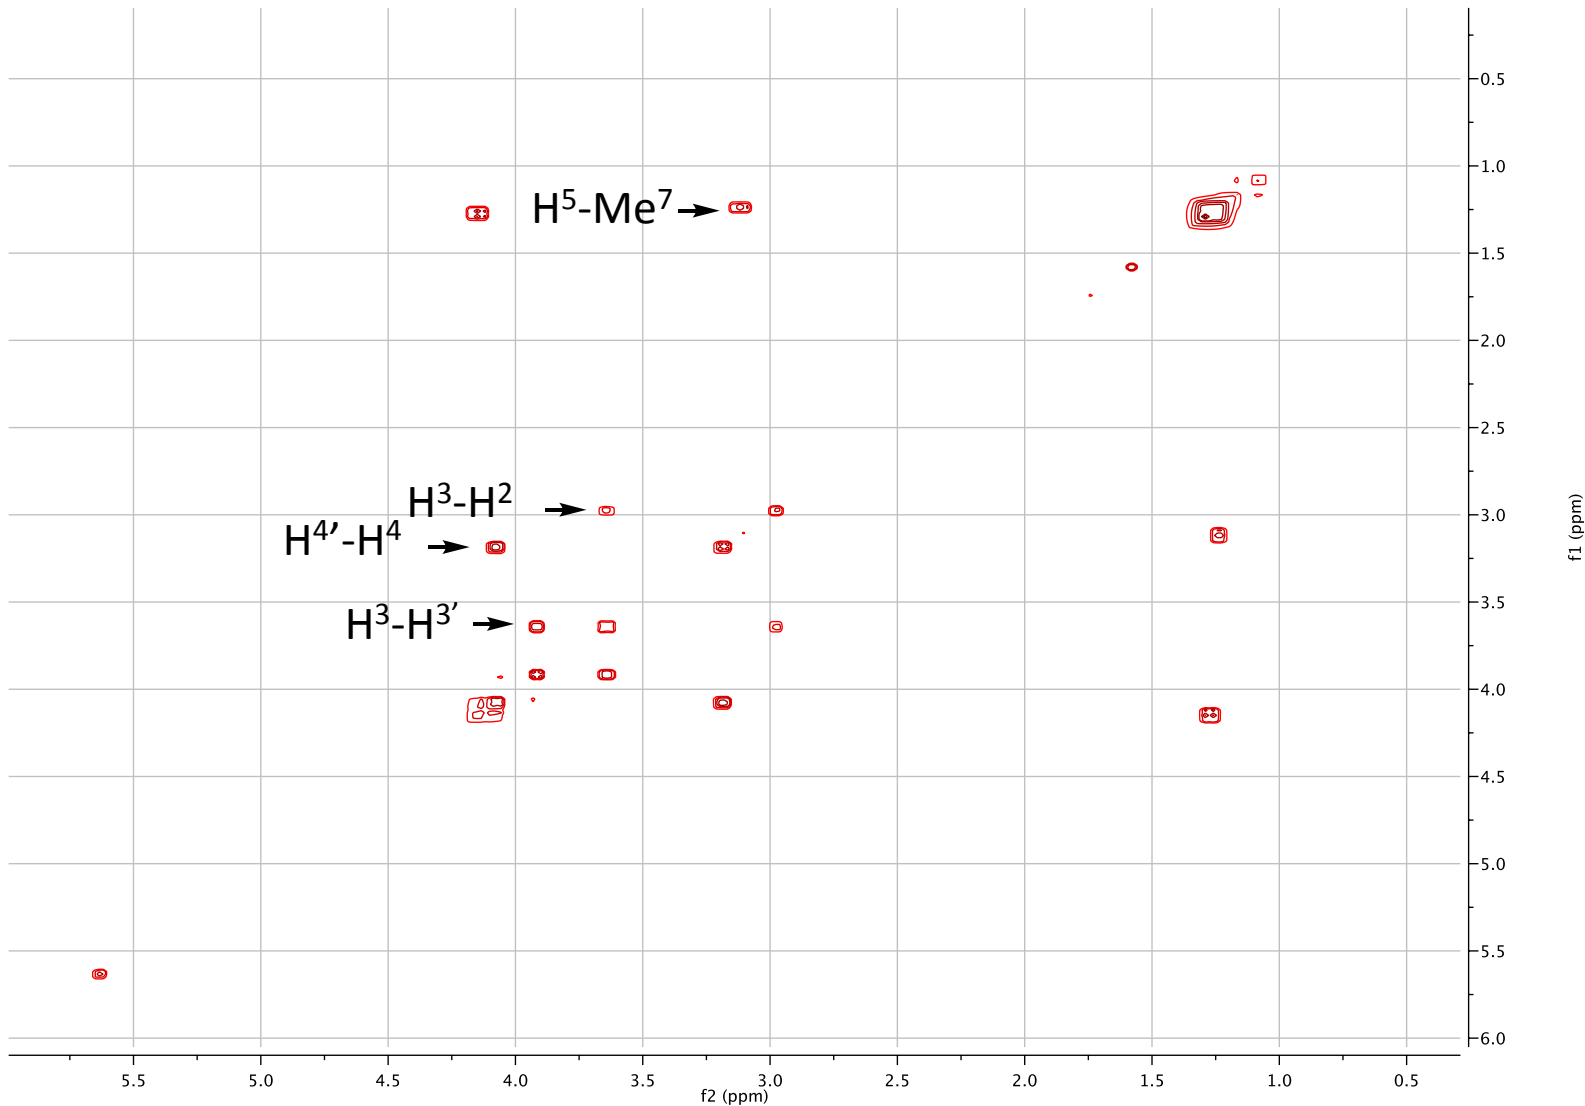

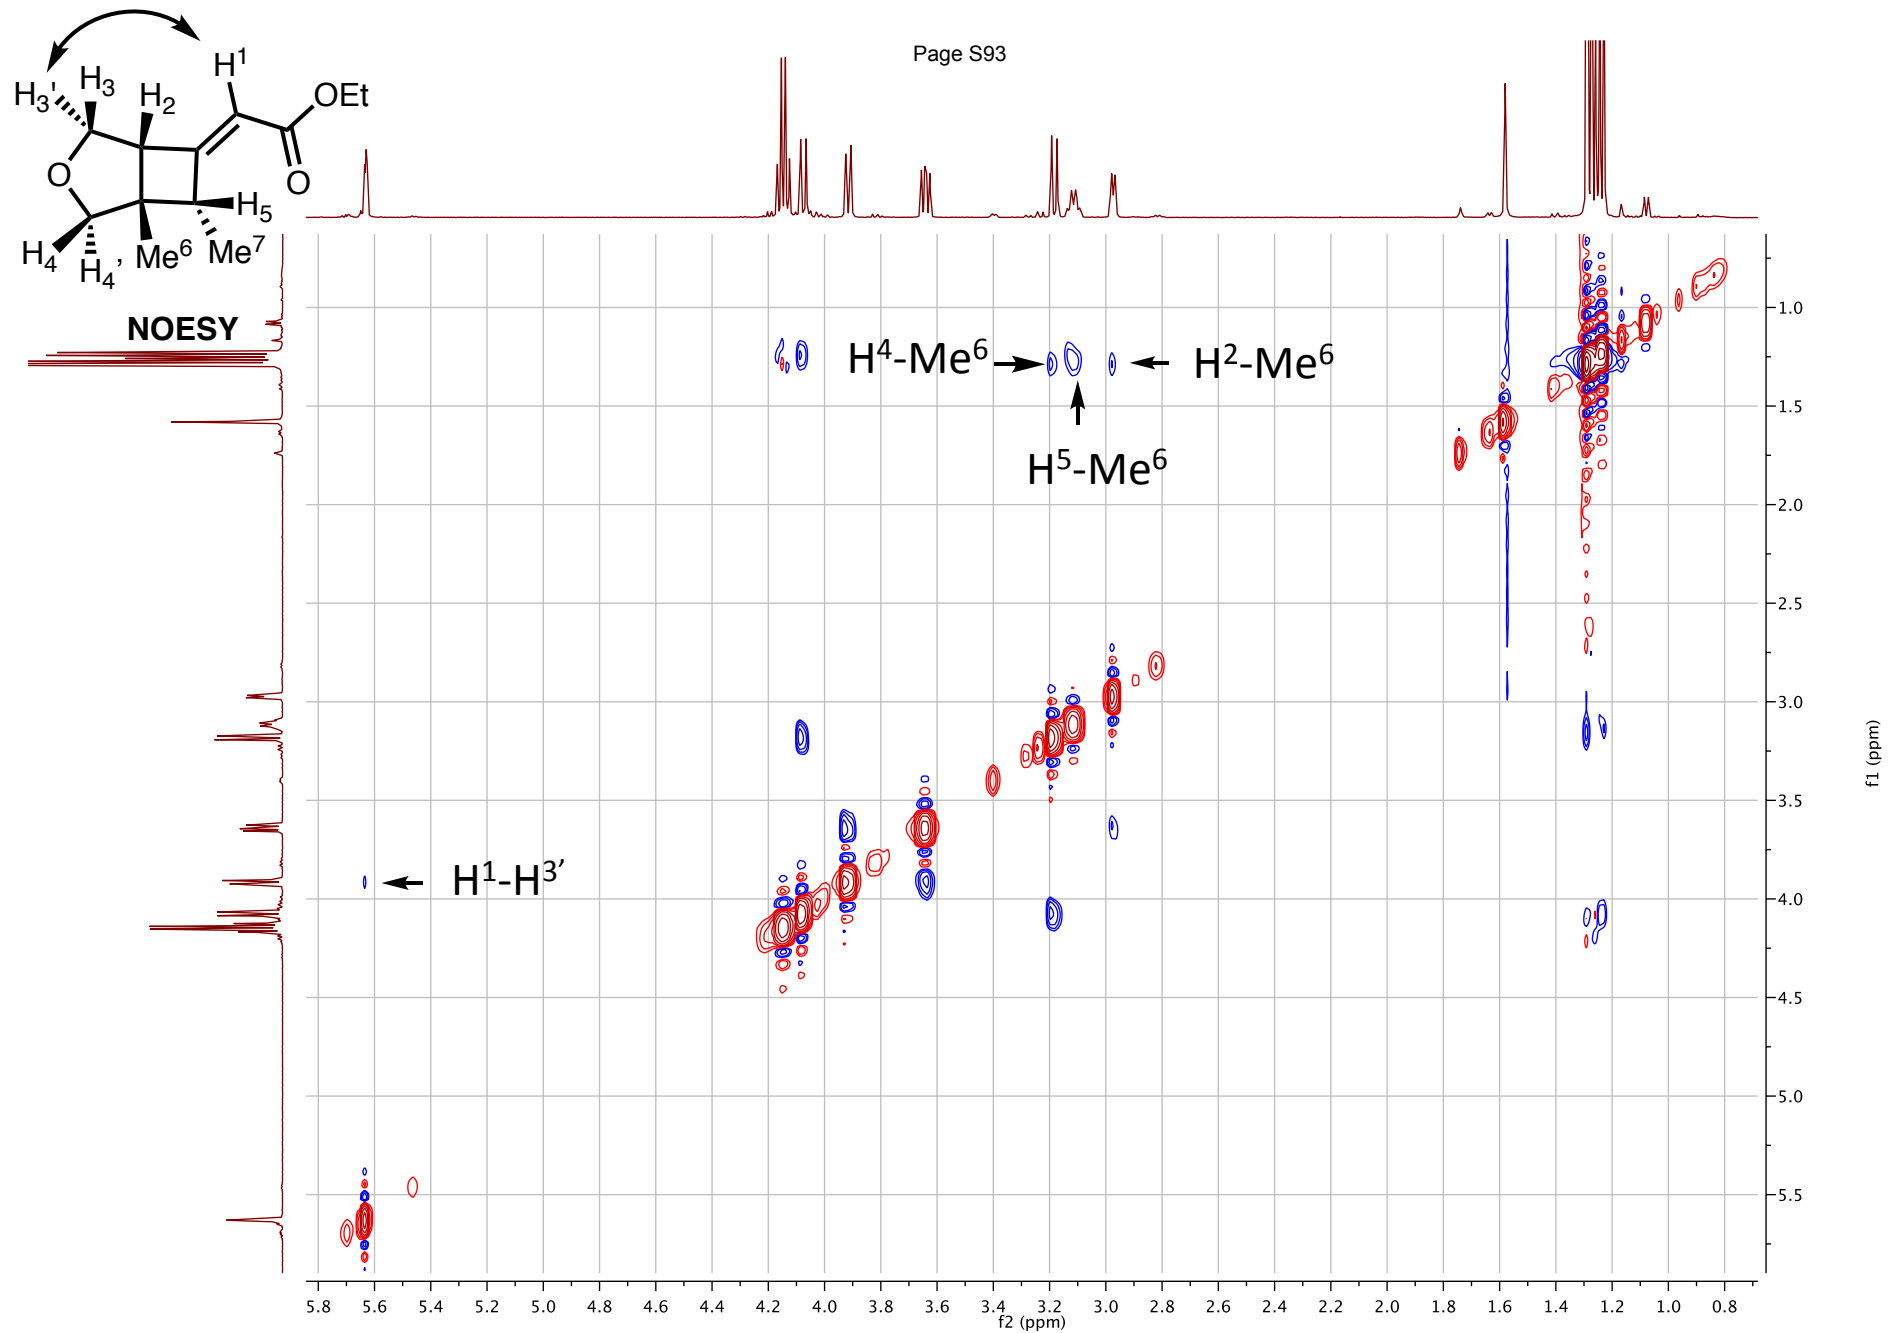

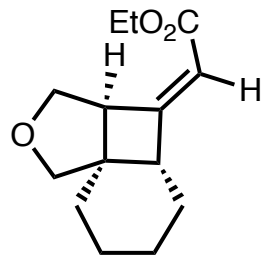

21a-b

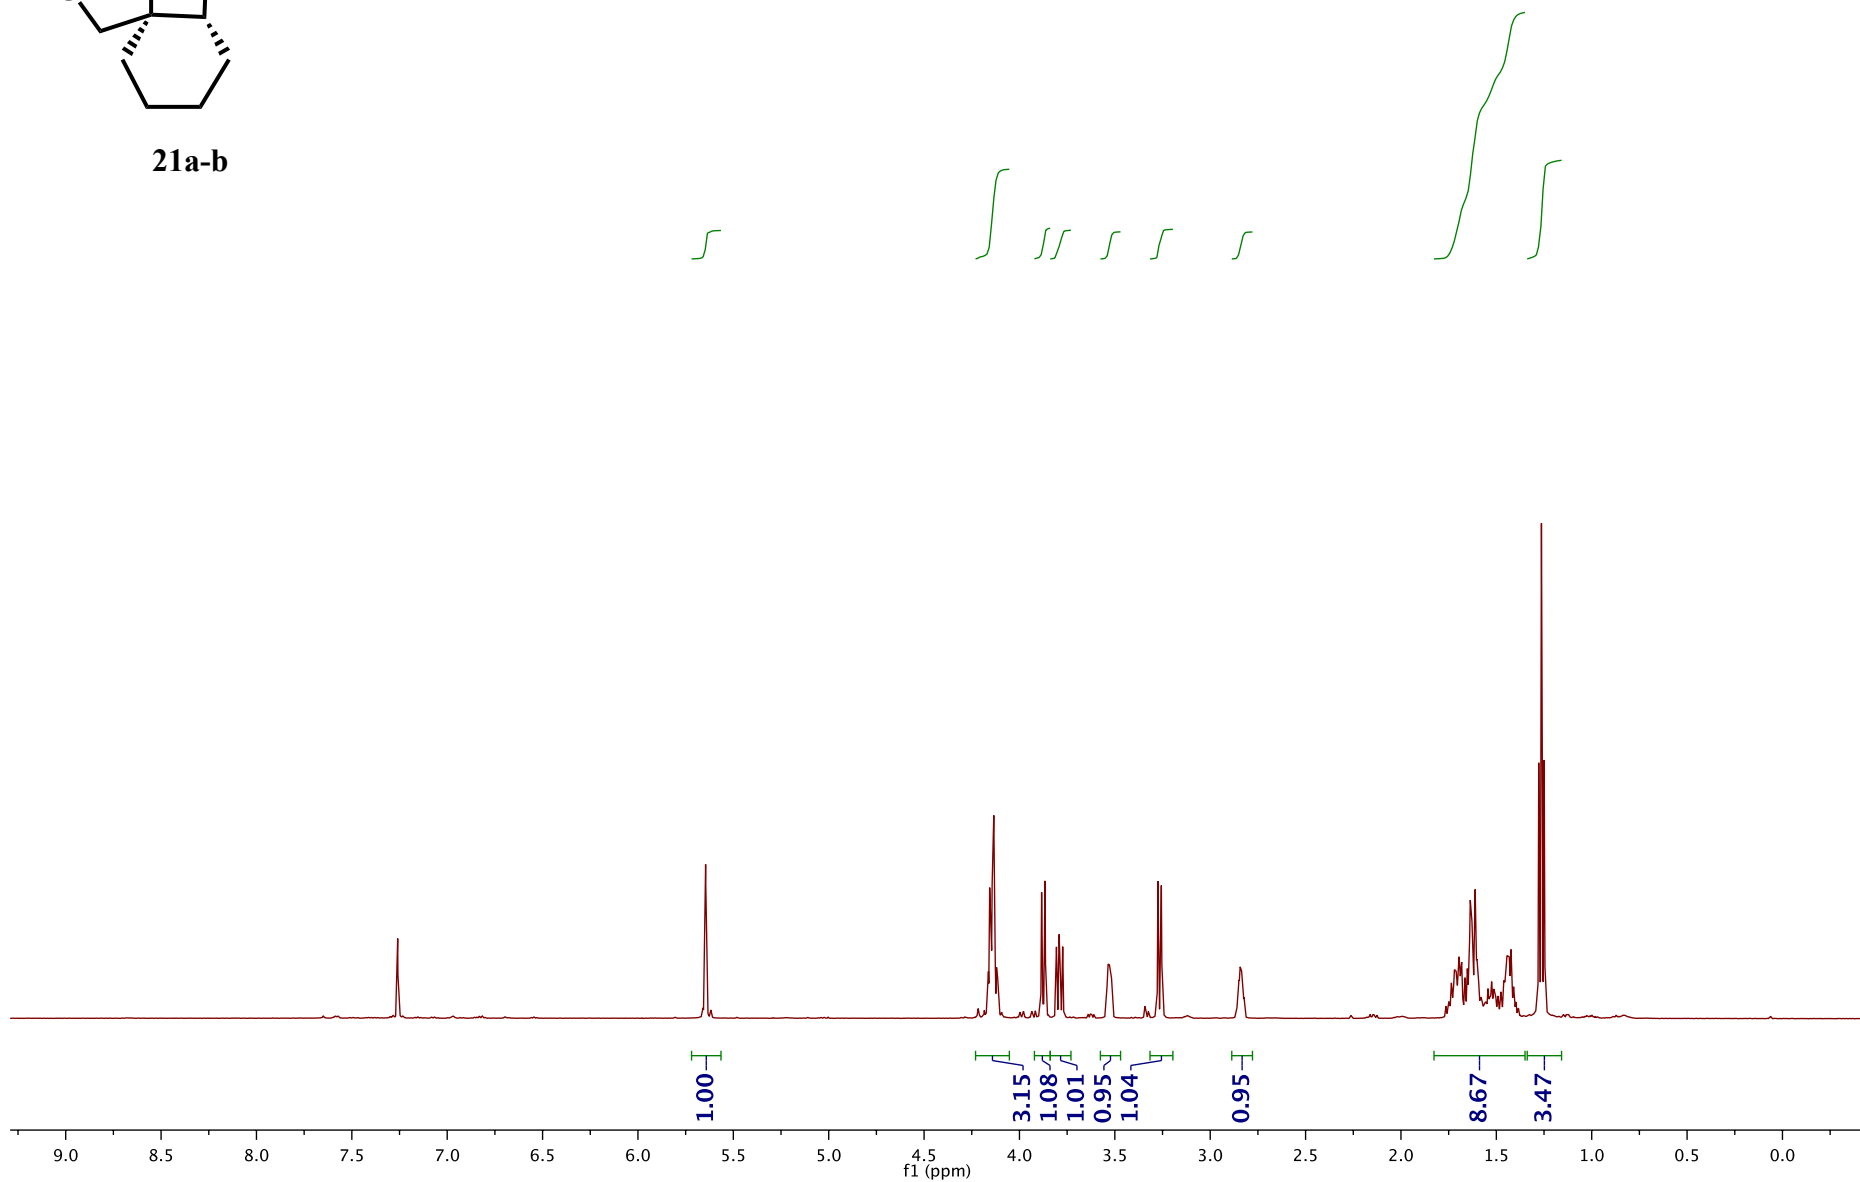

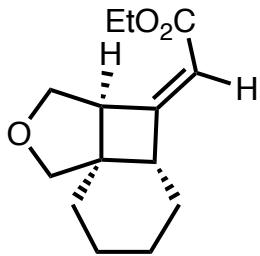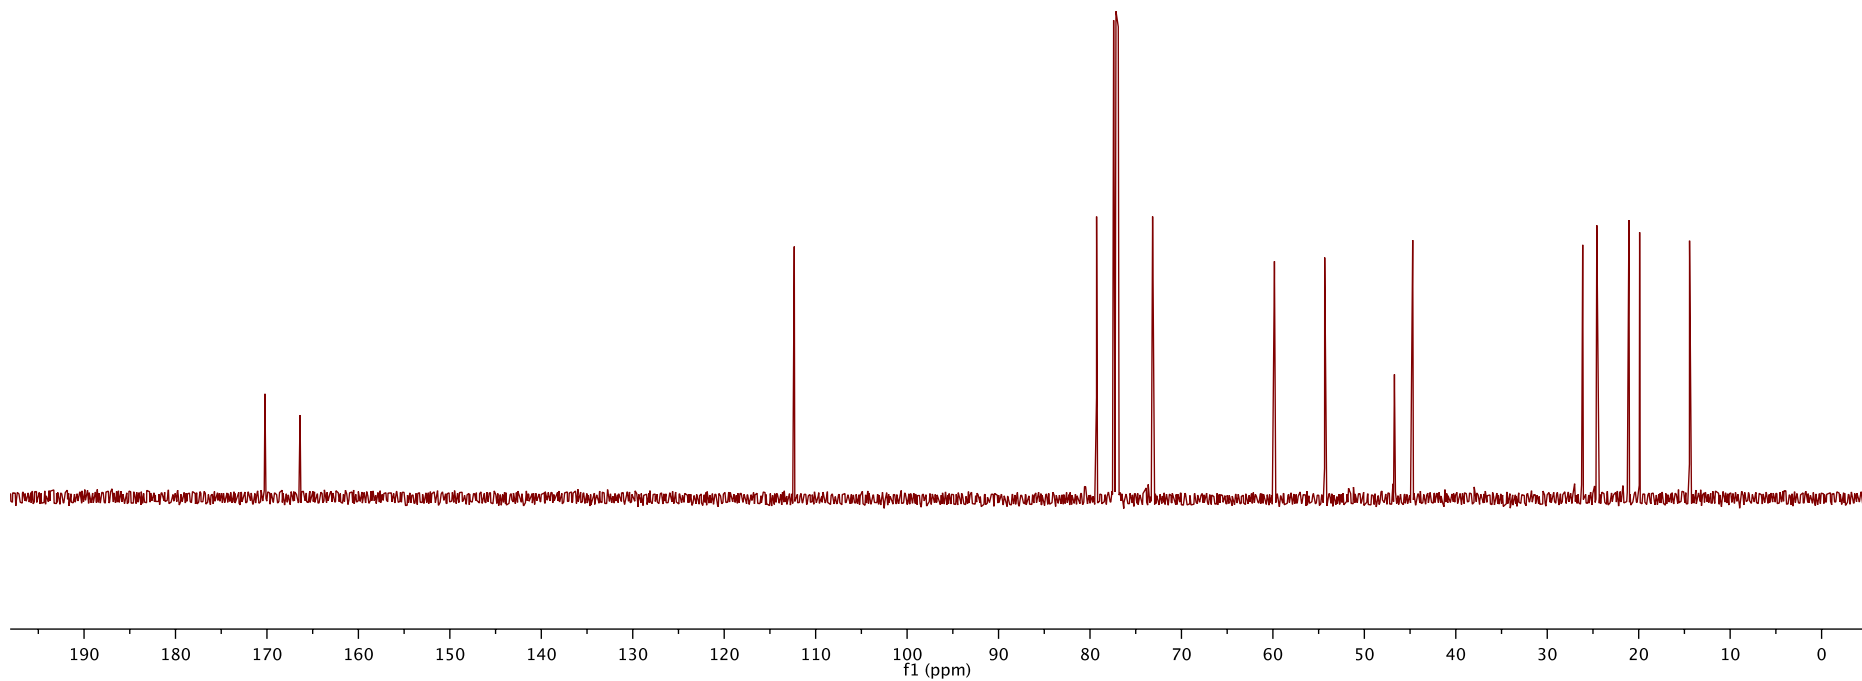

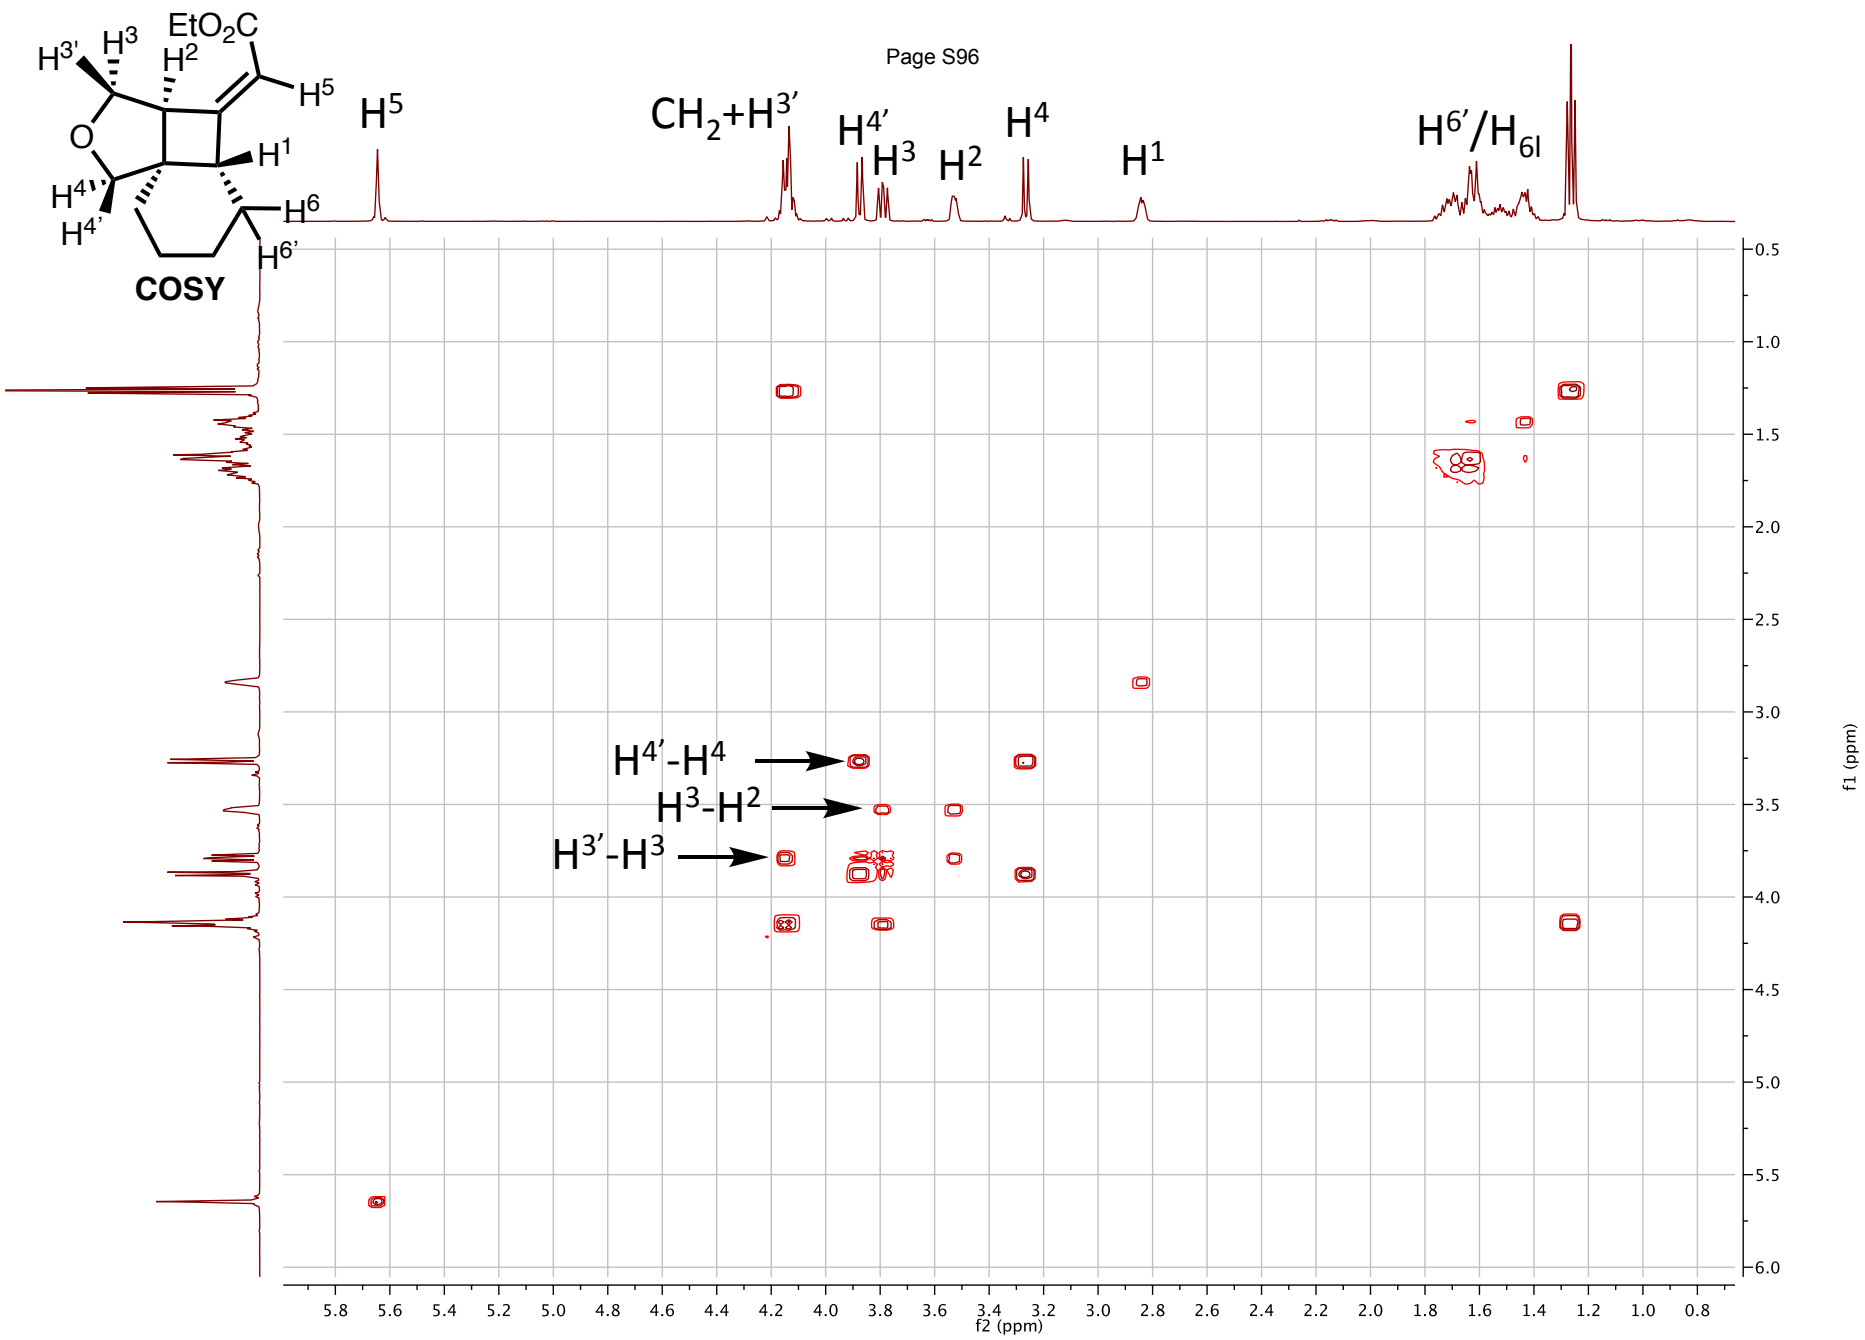



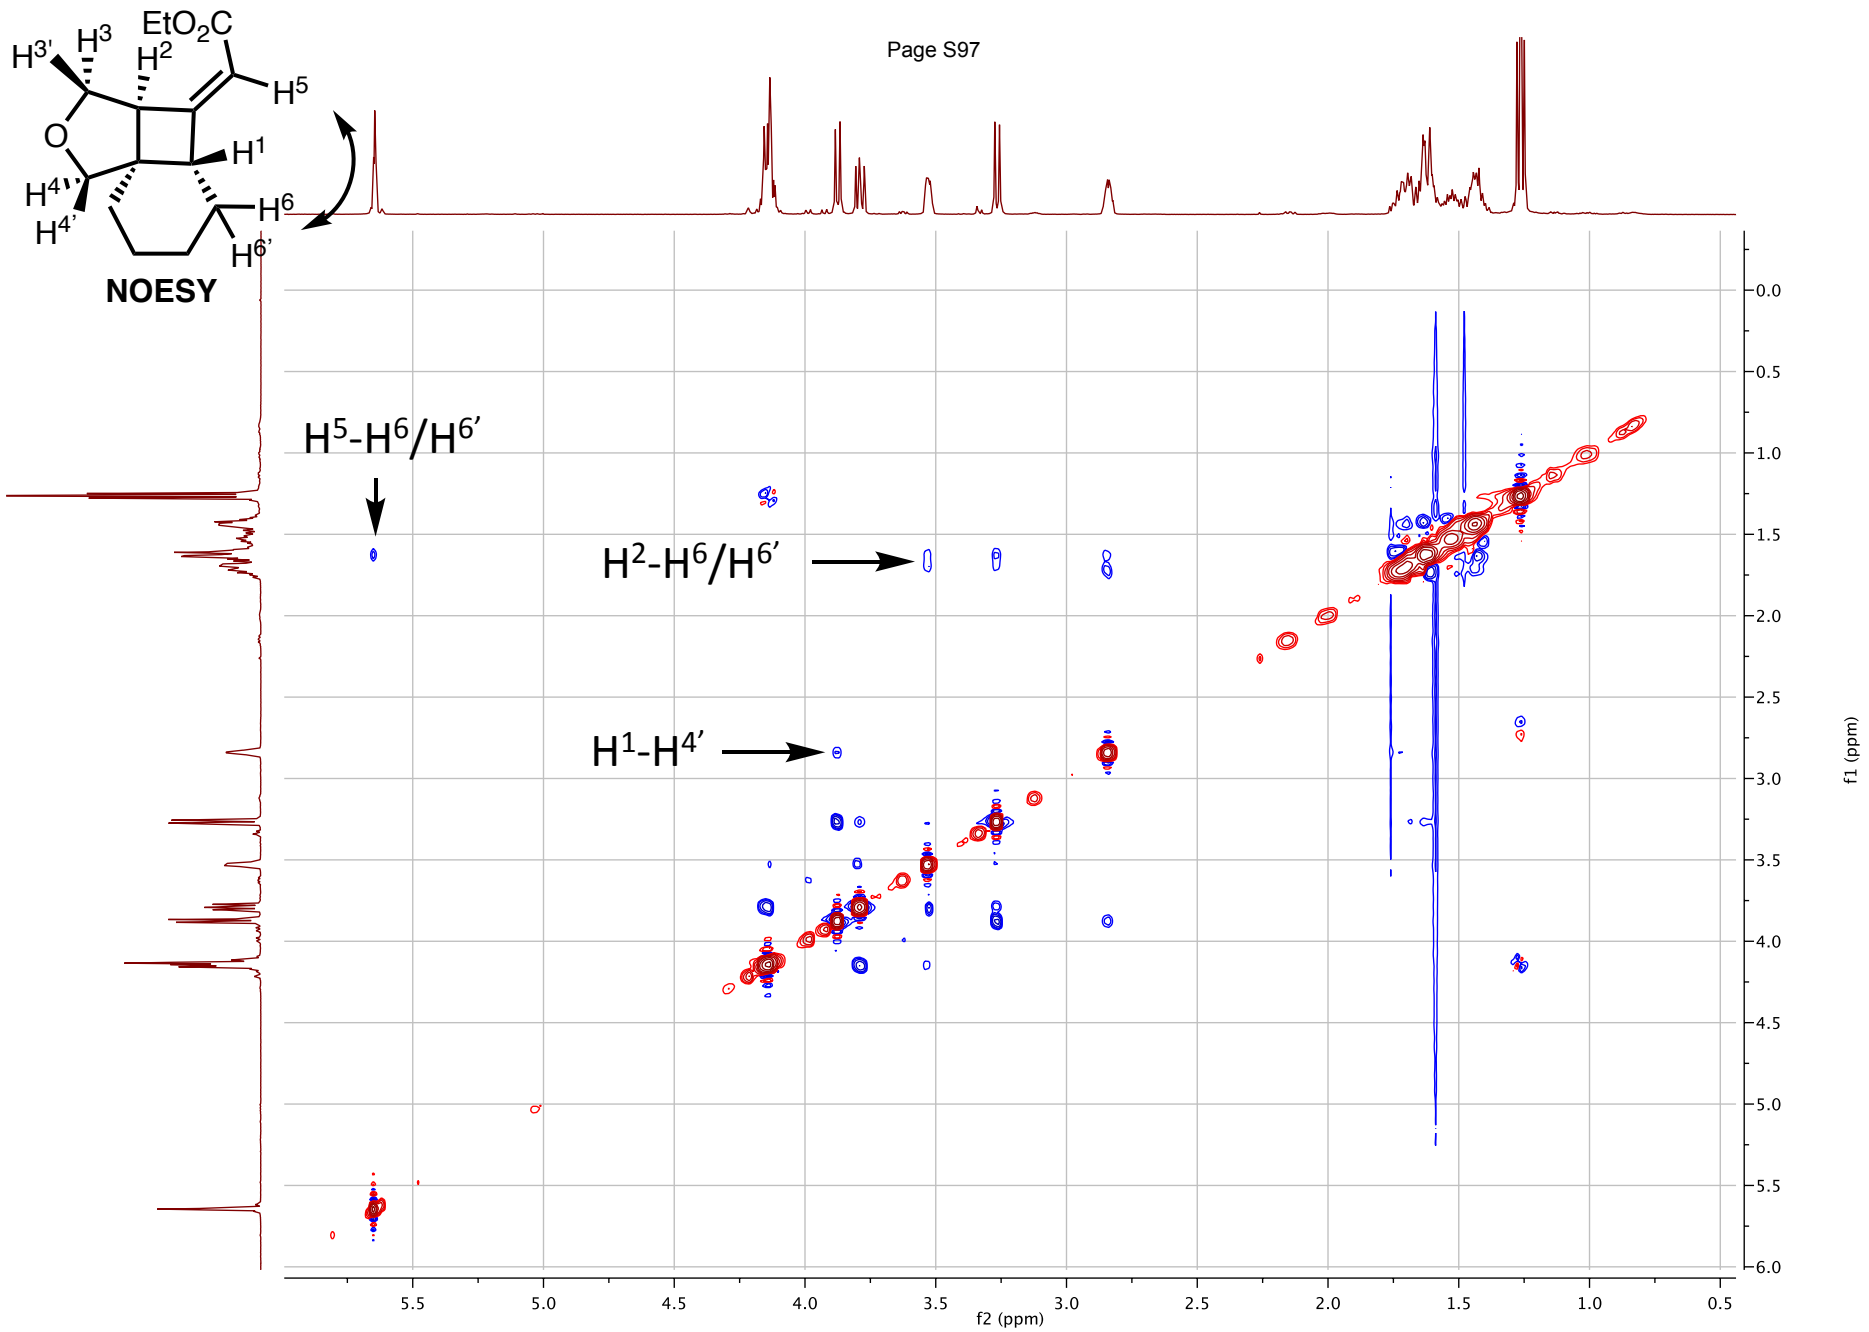

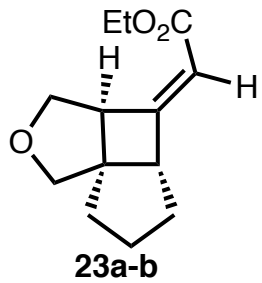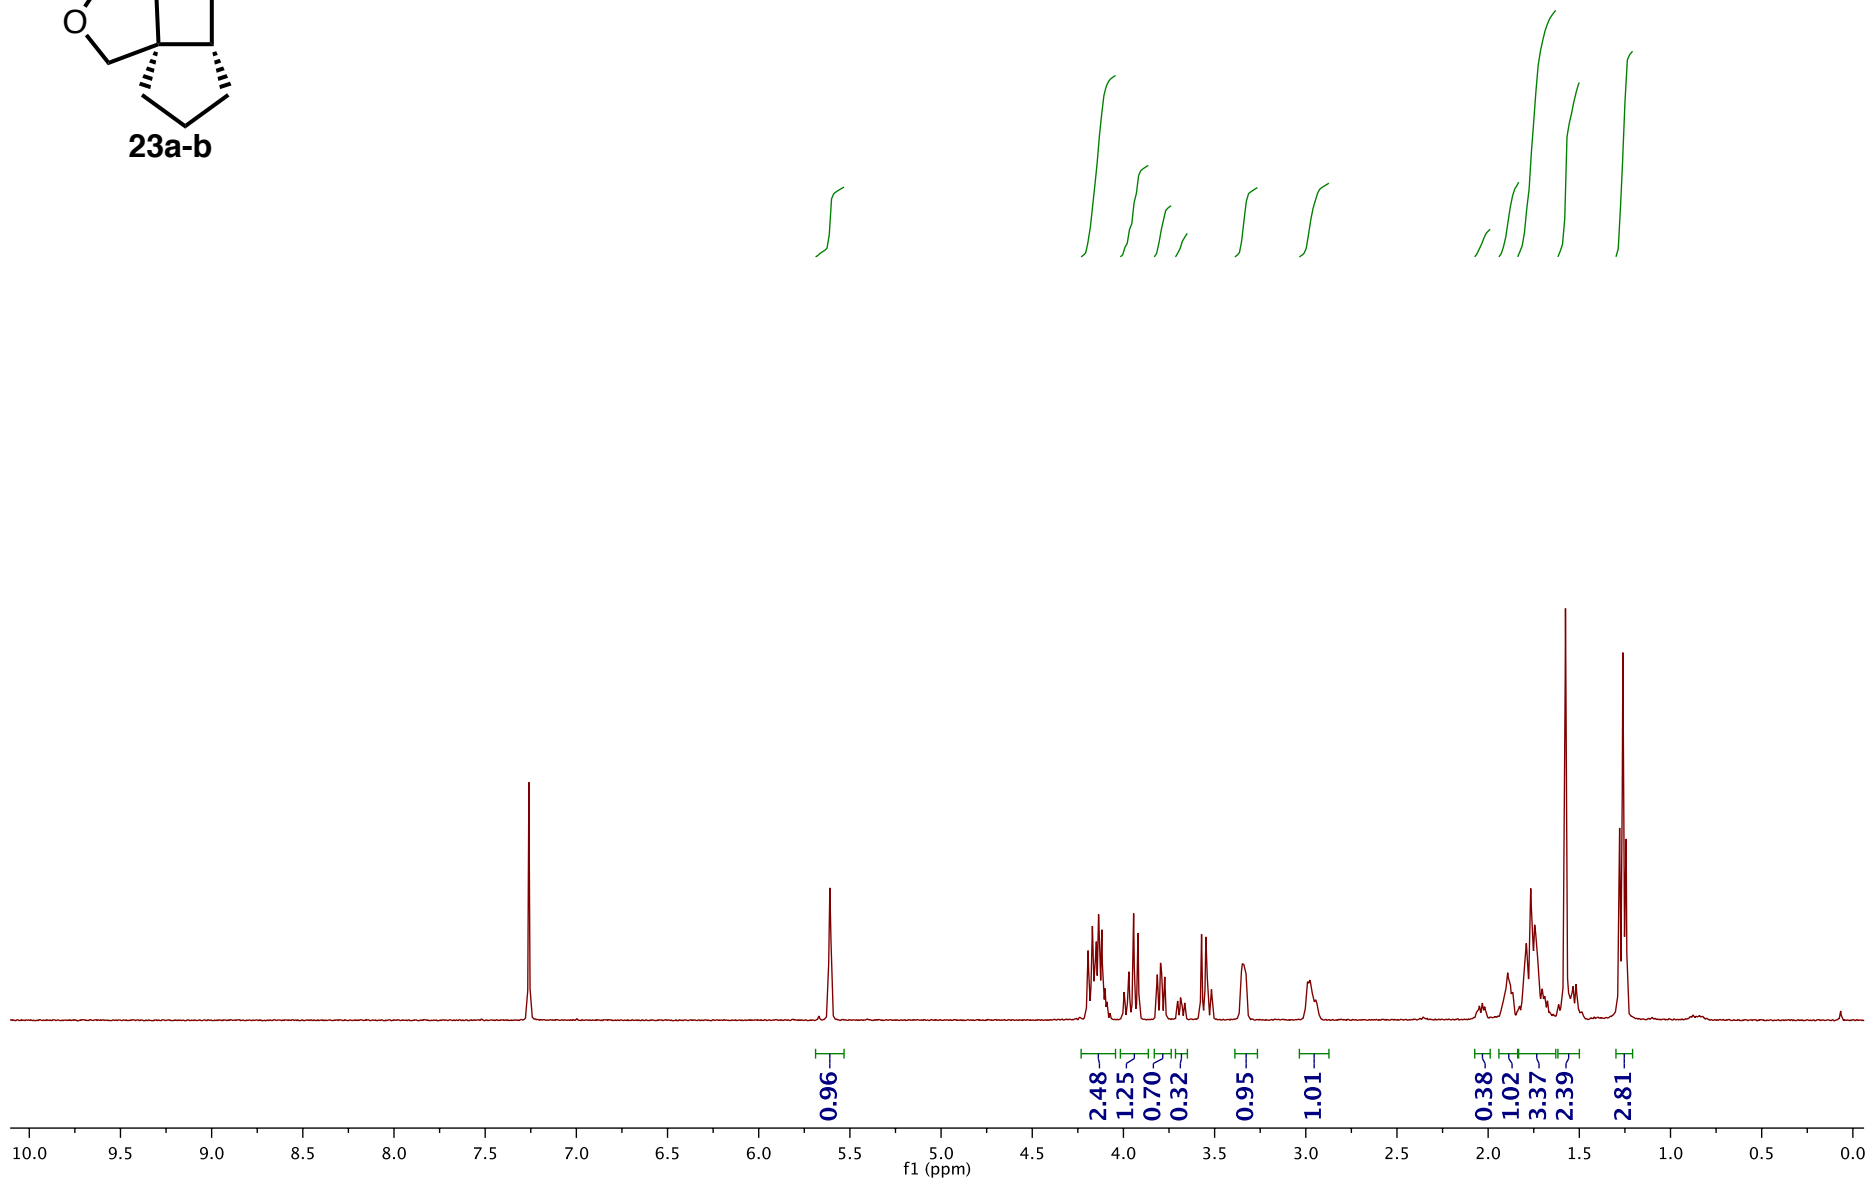

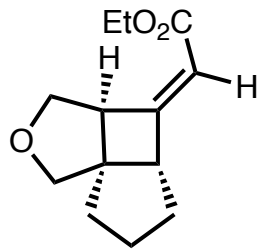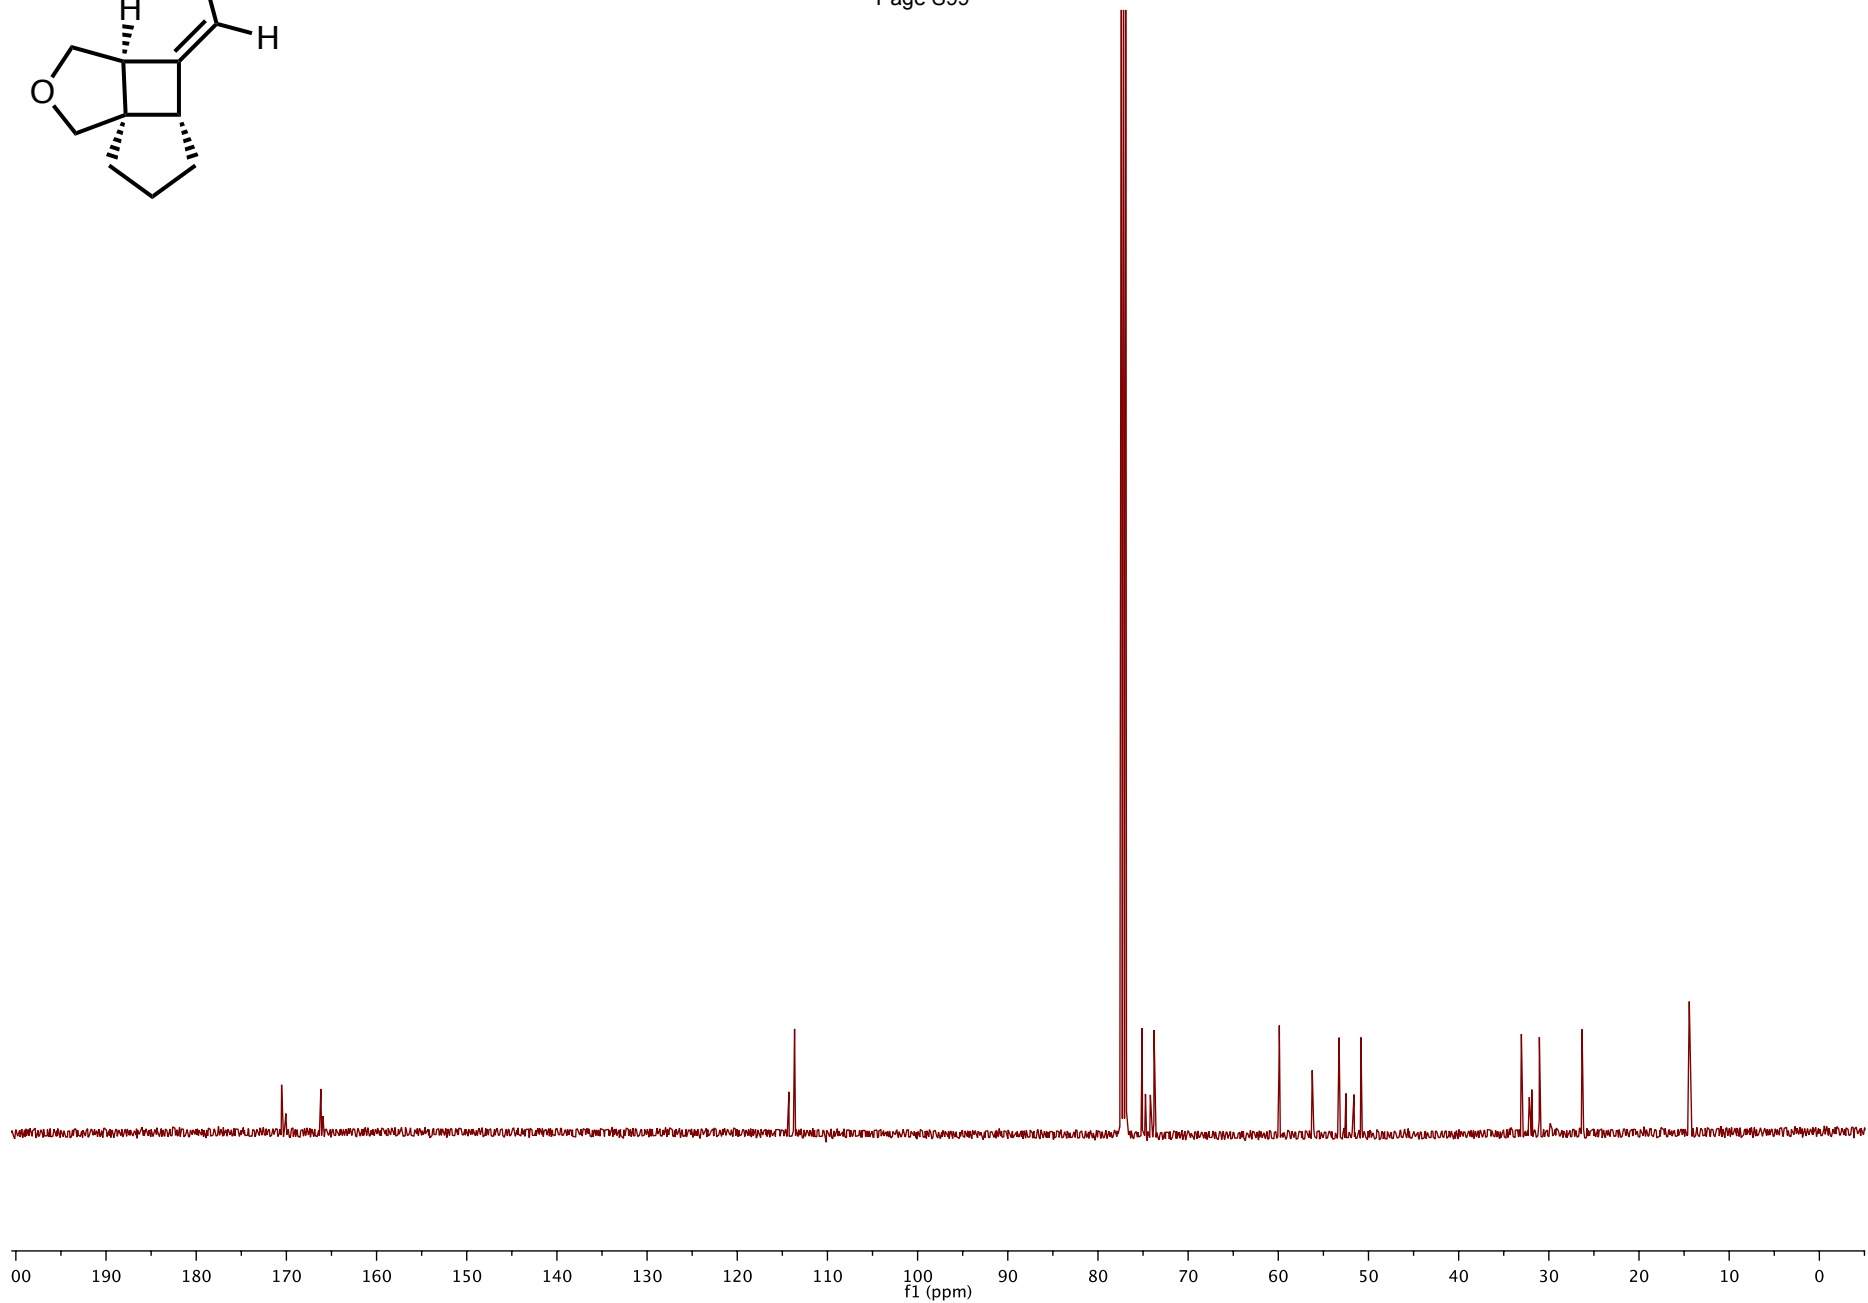

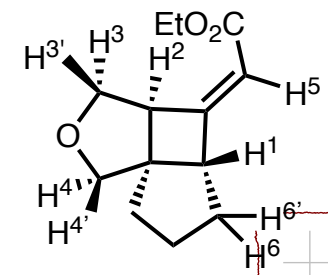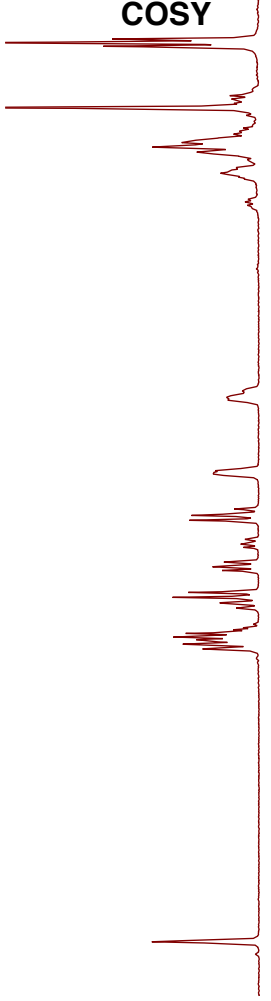

COSY

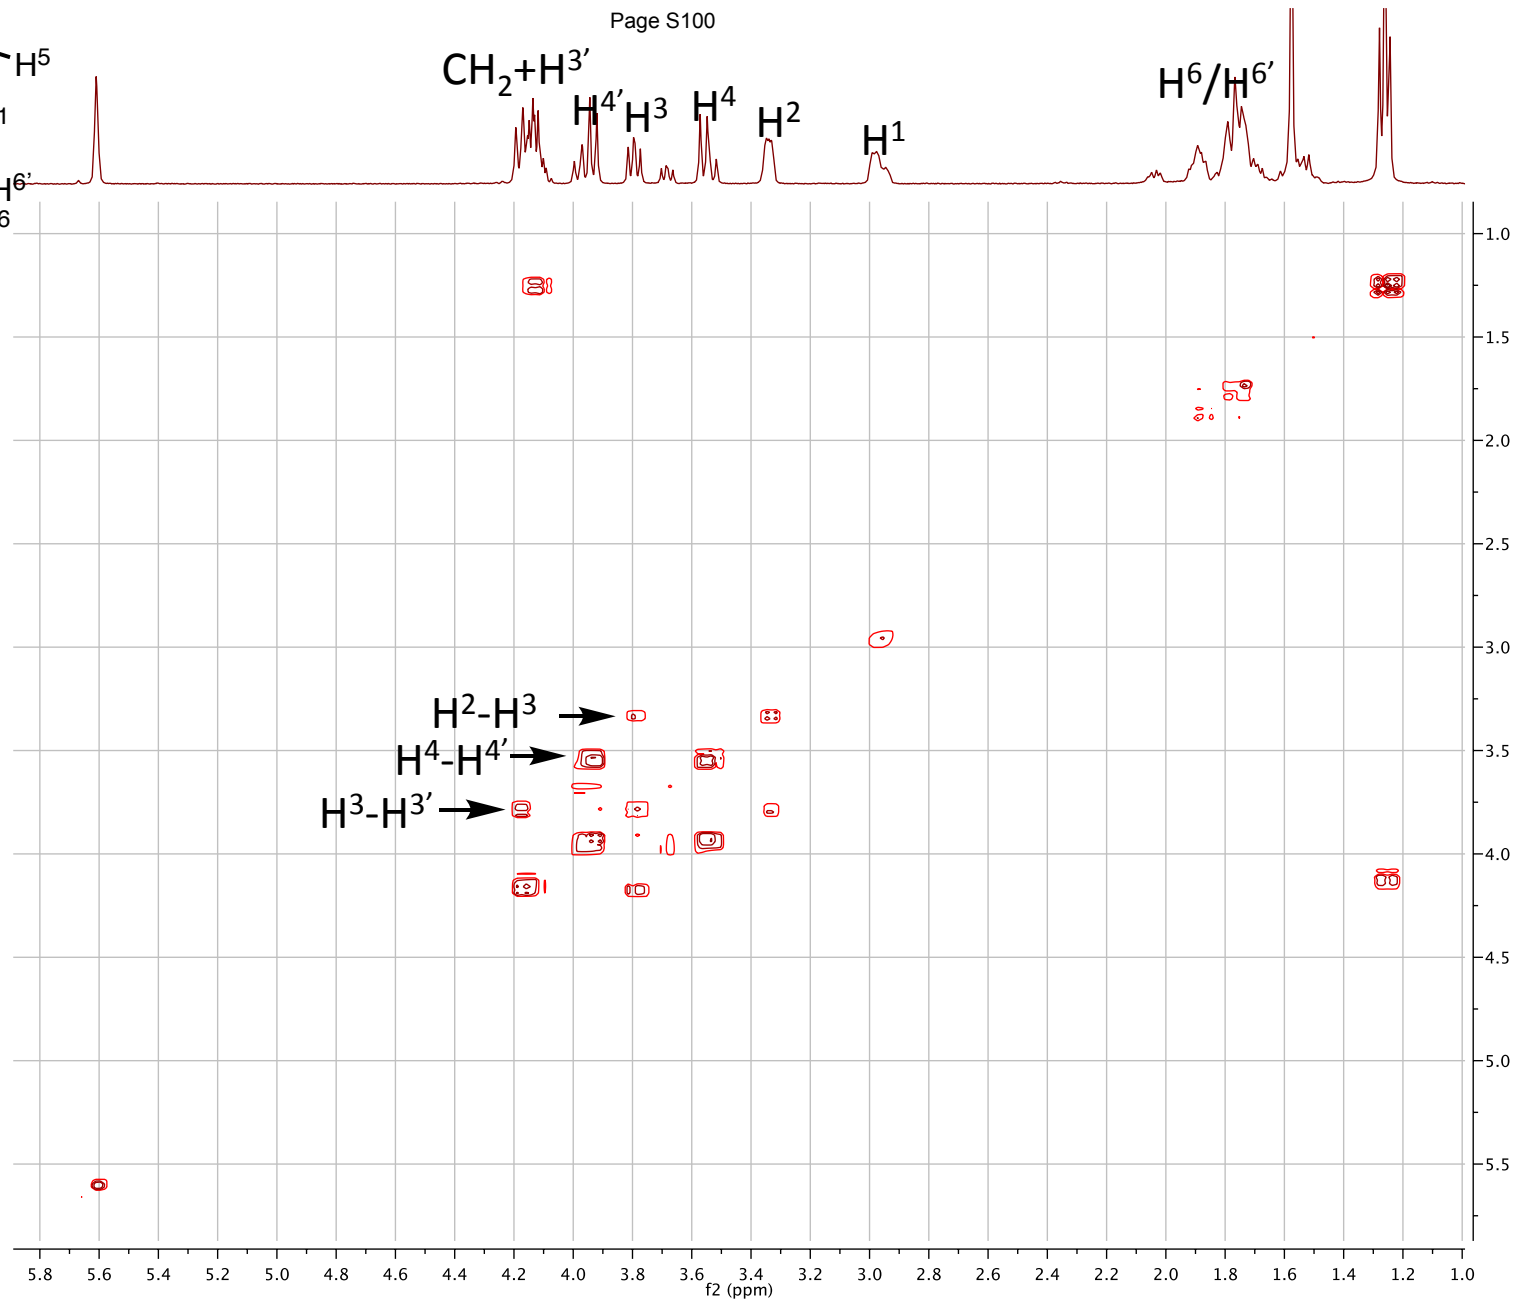

f1 (ppm)

f2 (ppm)

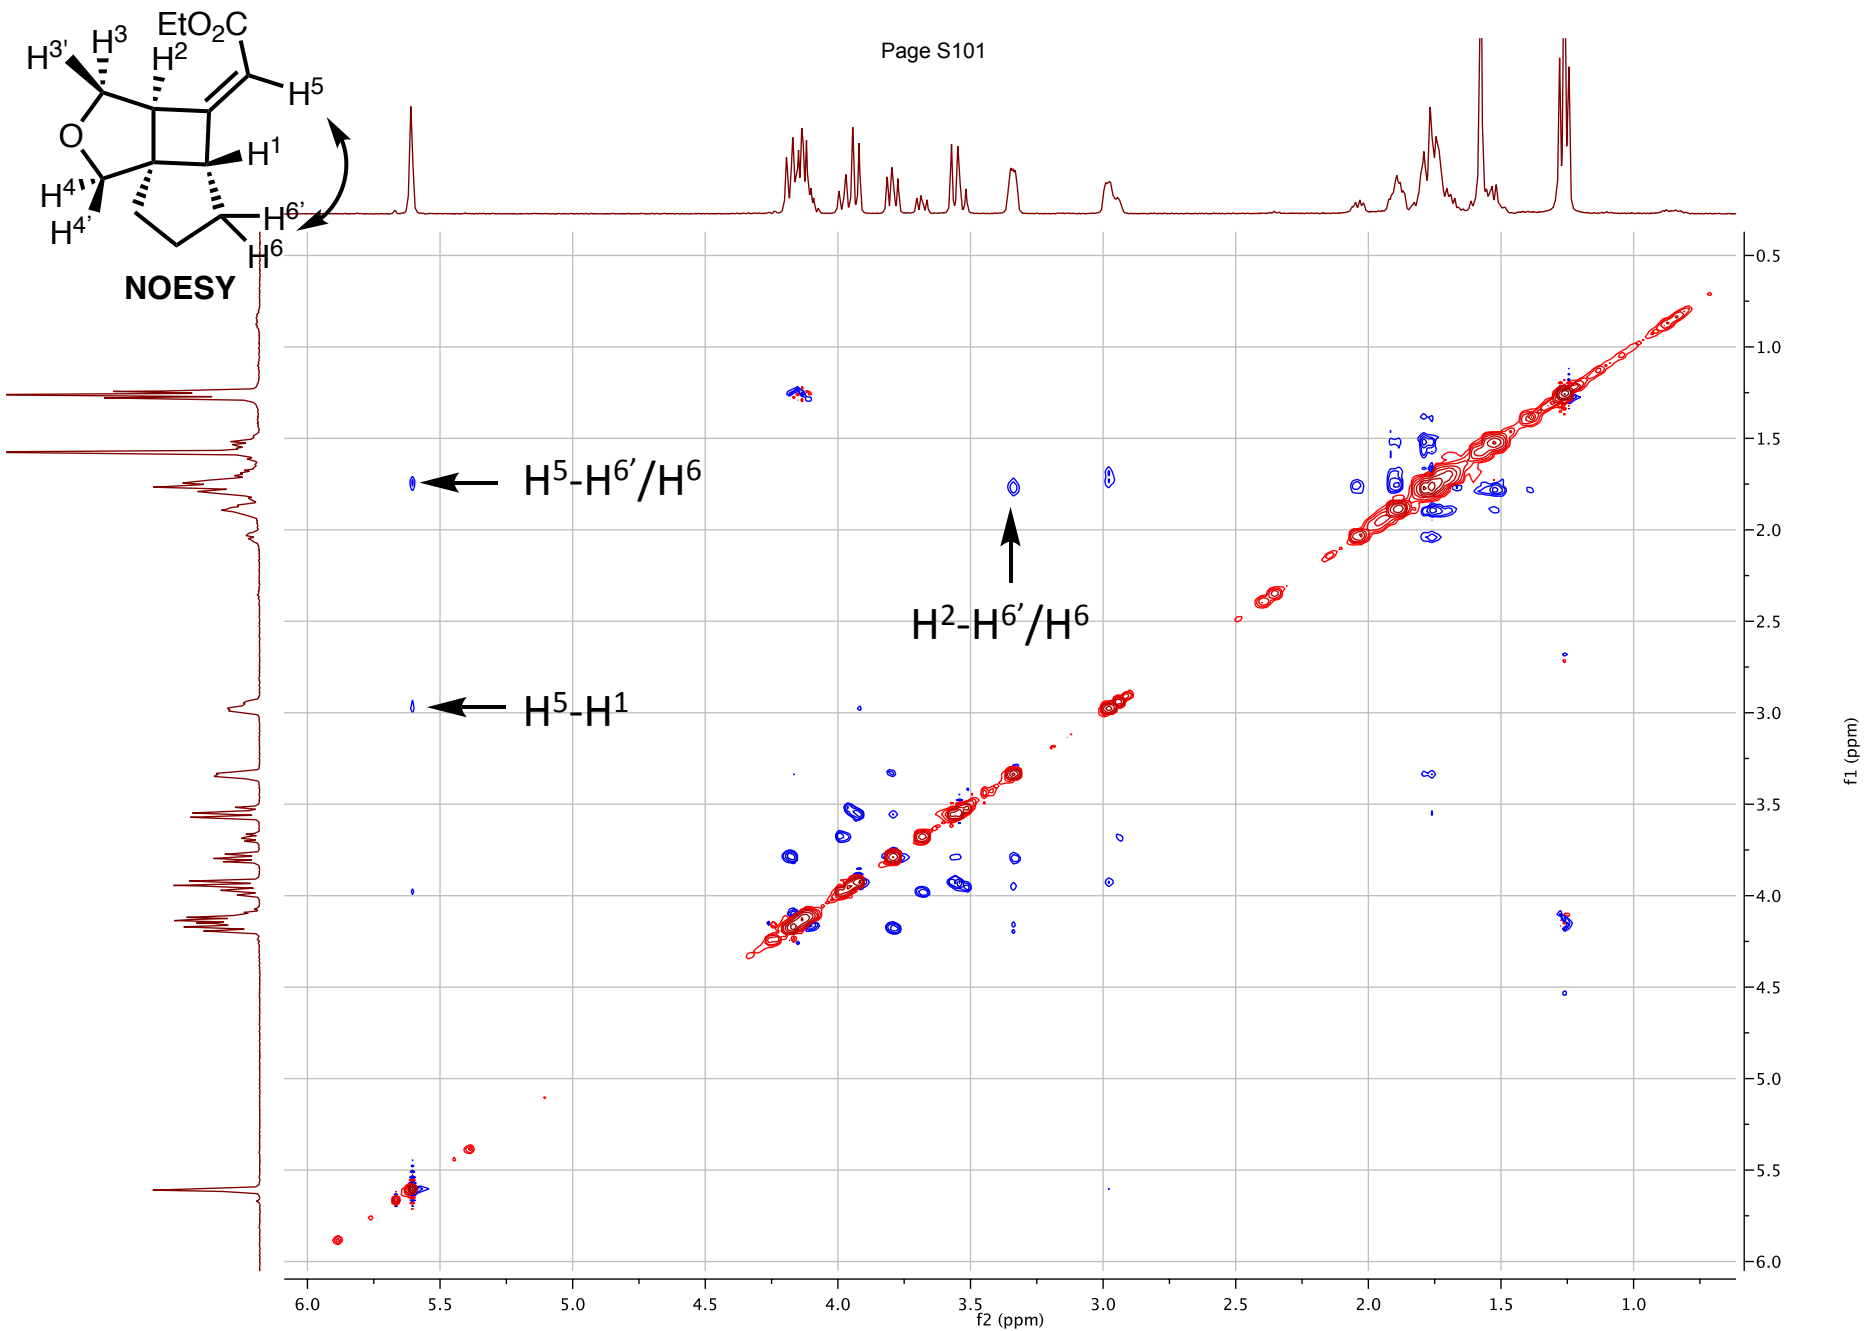

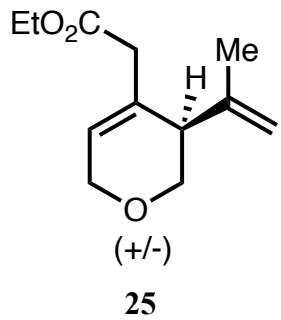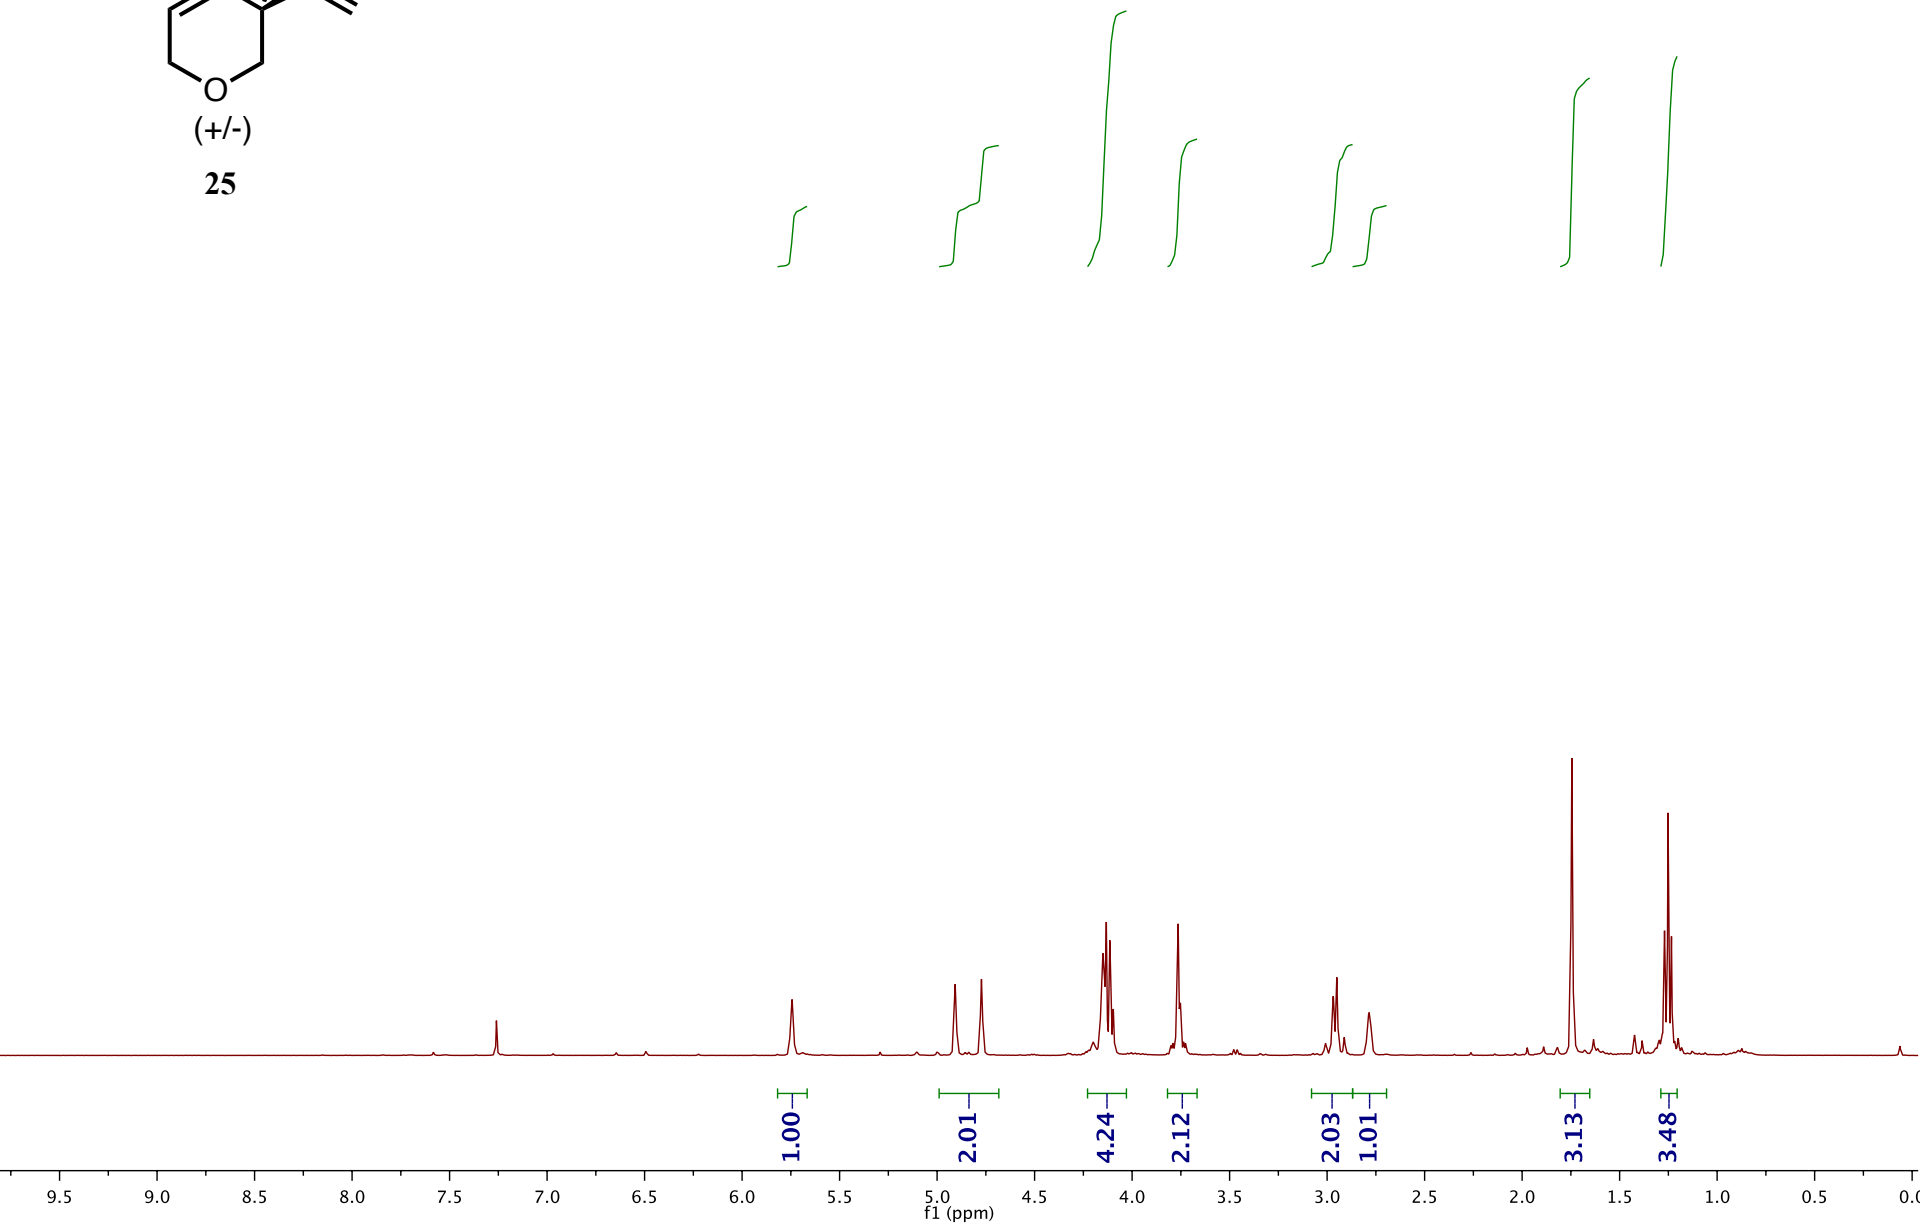

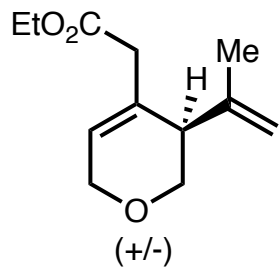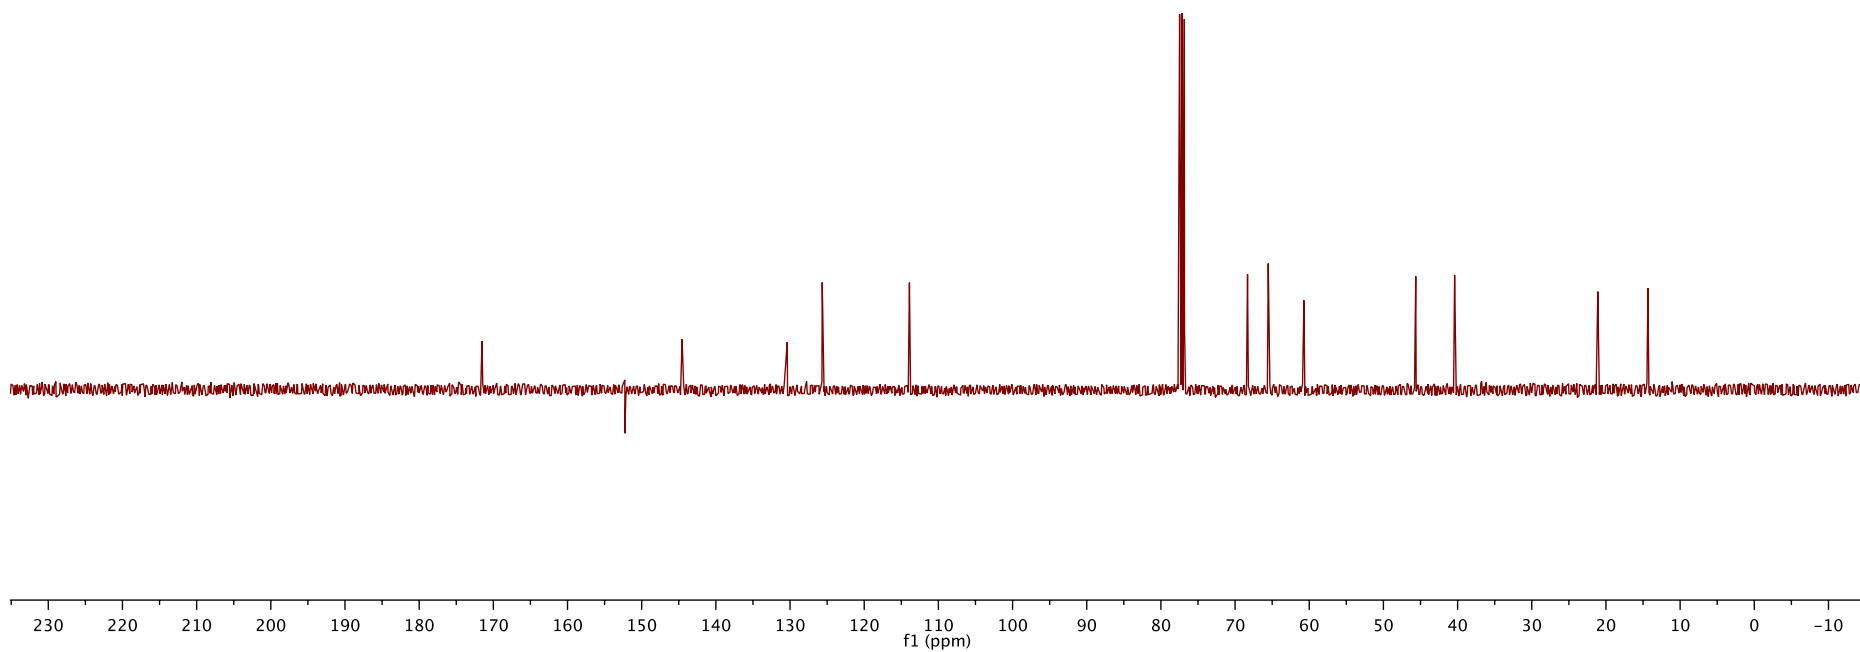

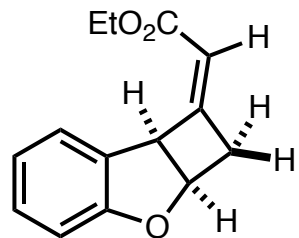

Spot 1  
minor diastereomer

27

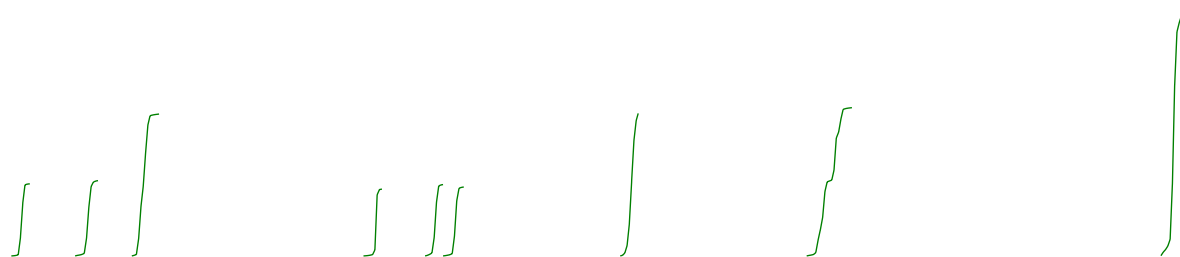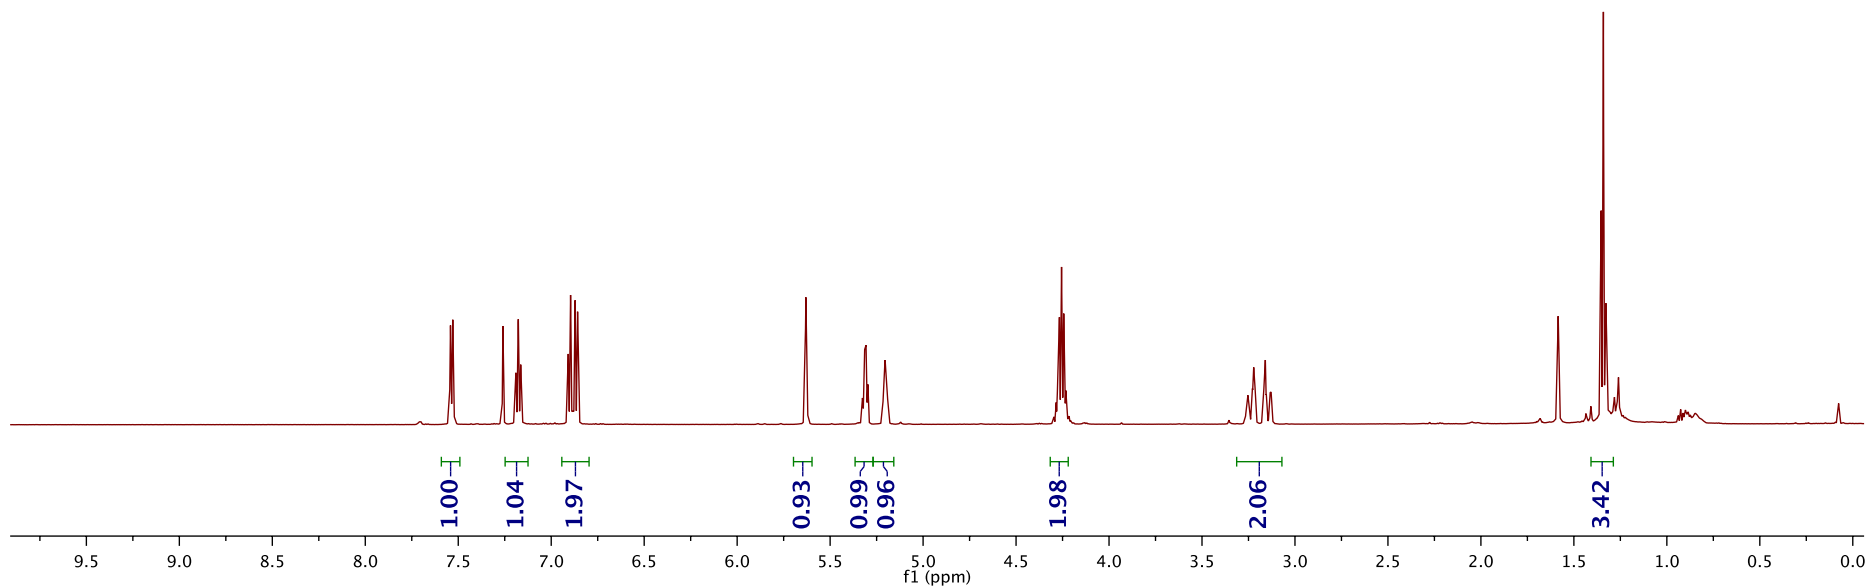



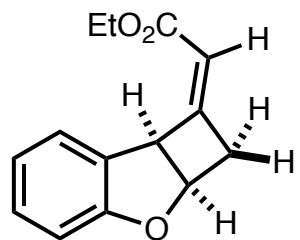

Spot 1  
minor diastereomer

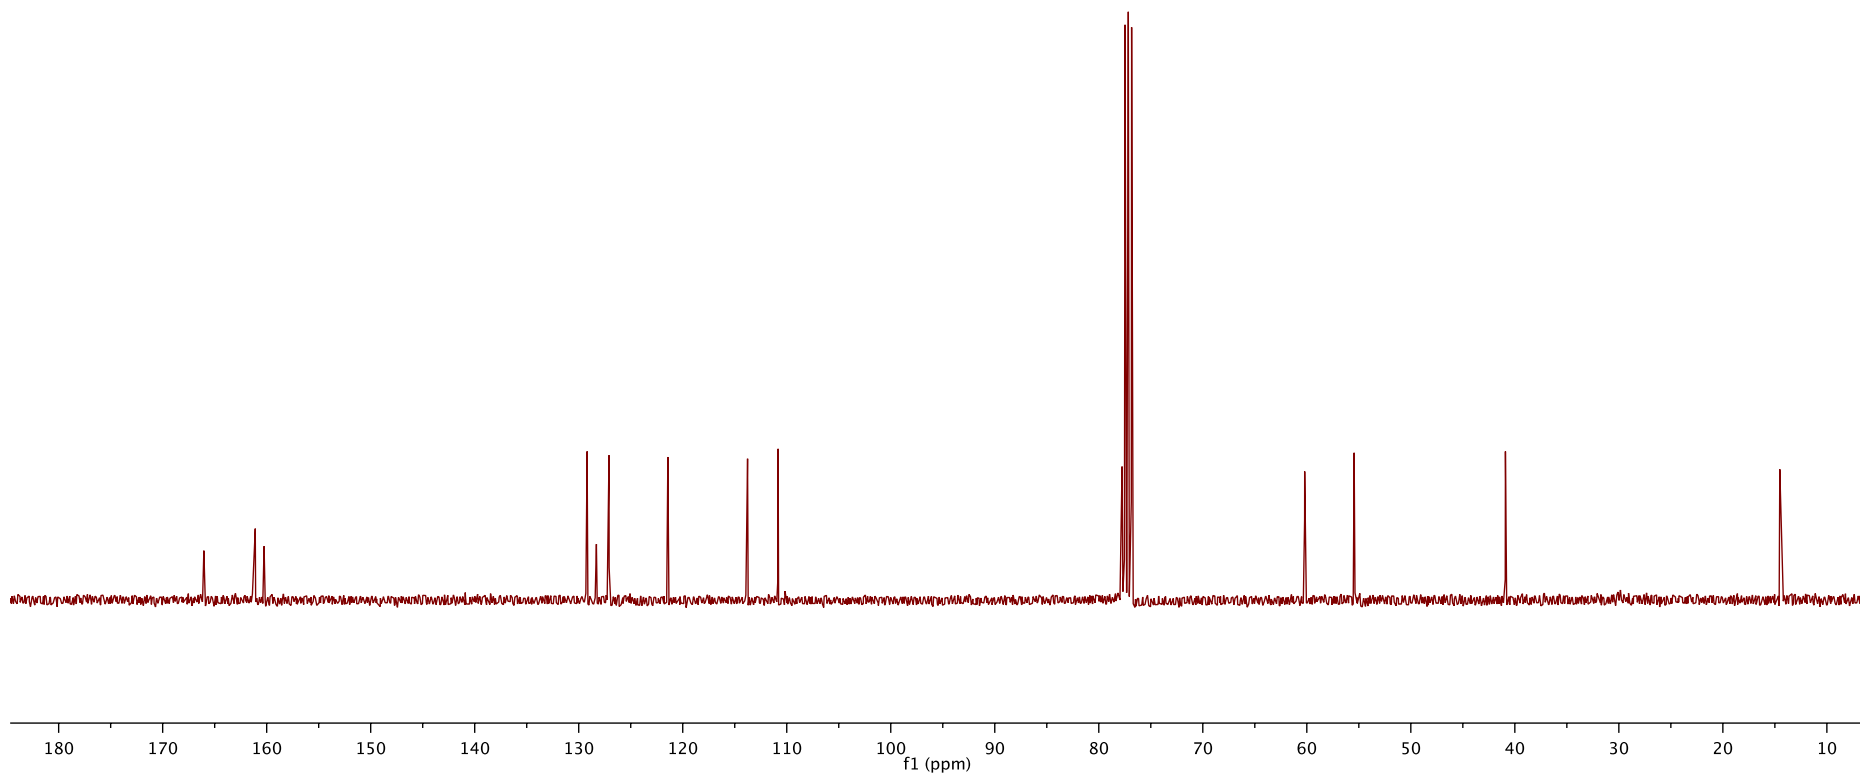

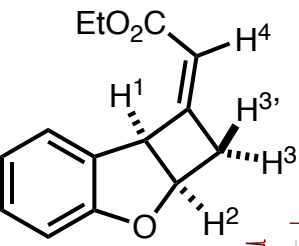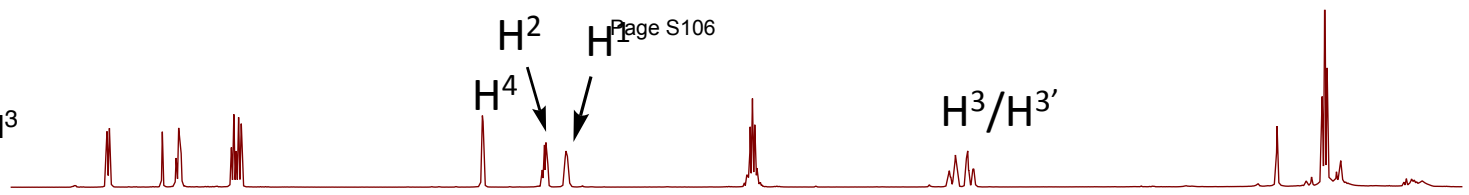

Spot 1  
minor diastereomer  
COSY

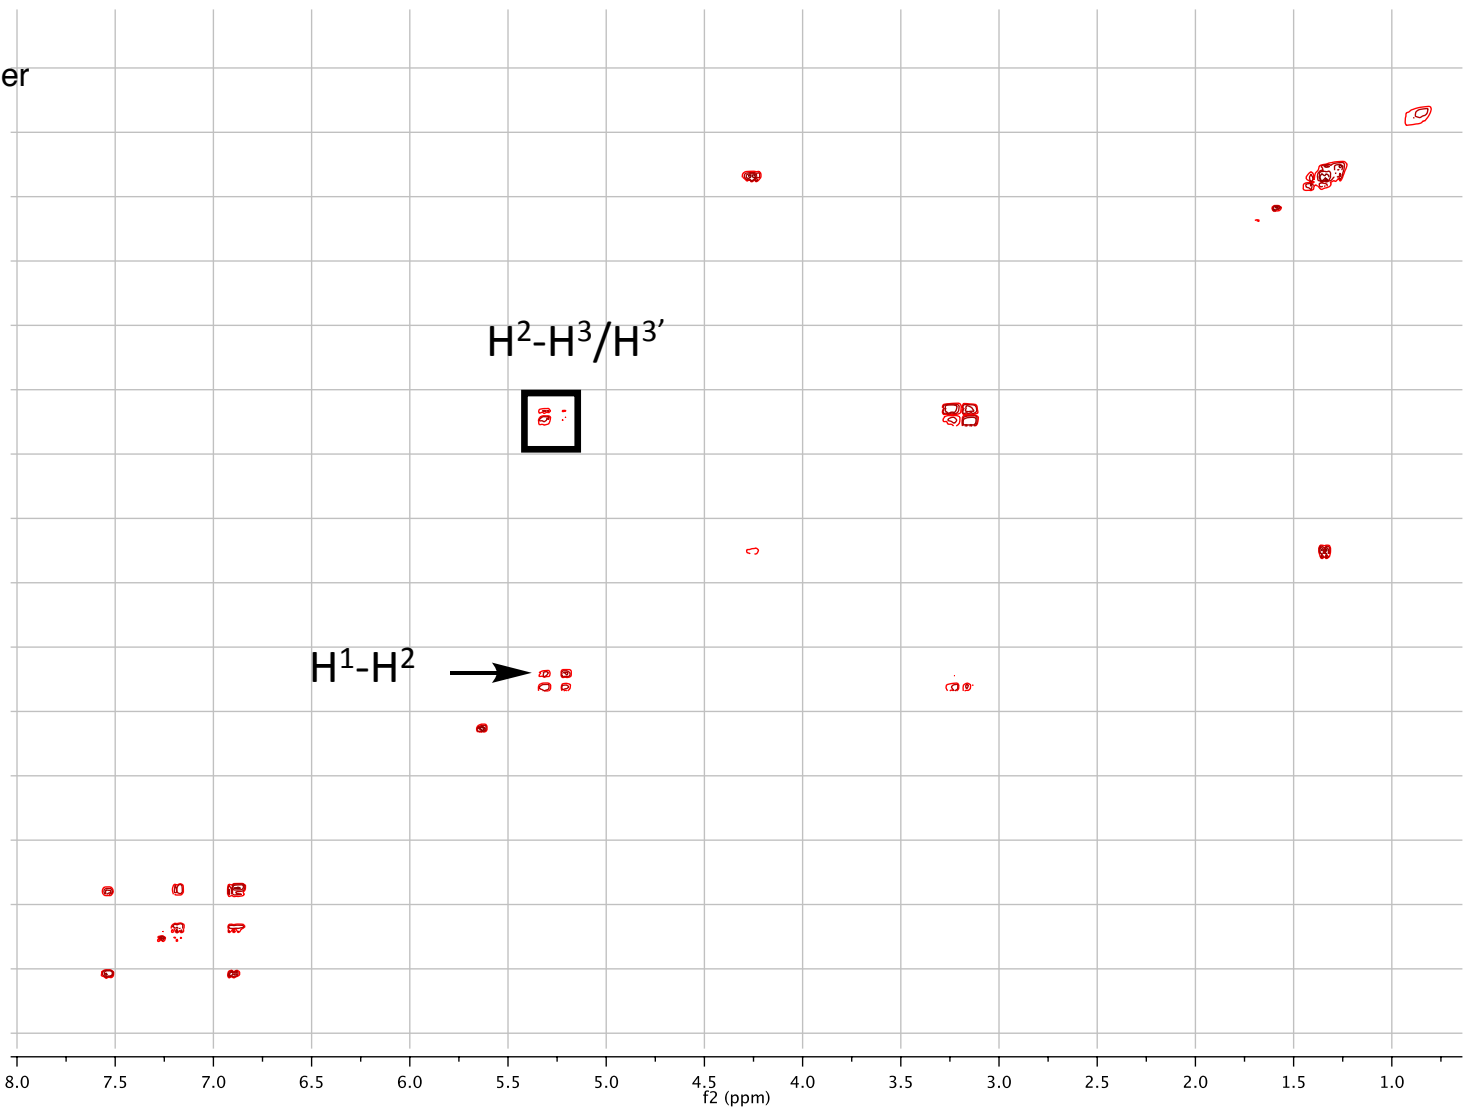

f1 (ppm)

f2 (ppm)

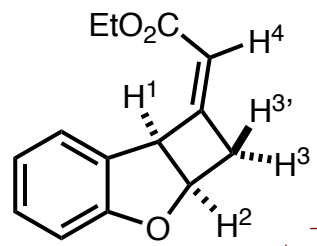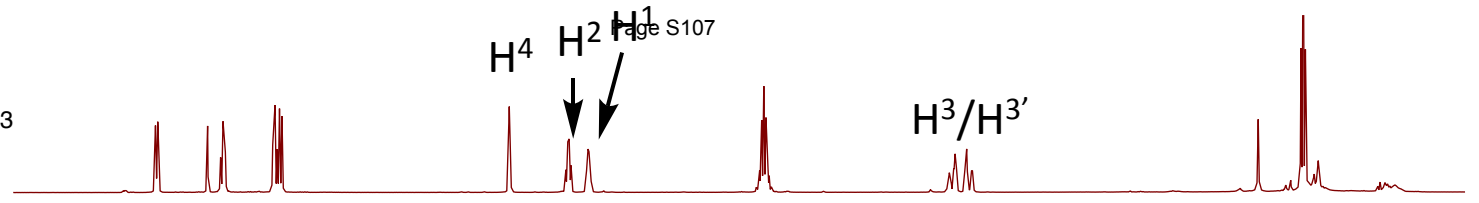

Spot 1  
minor diastereomer  
NOESY

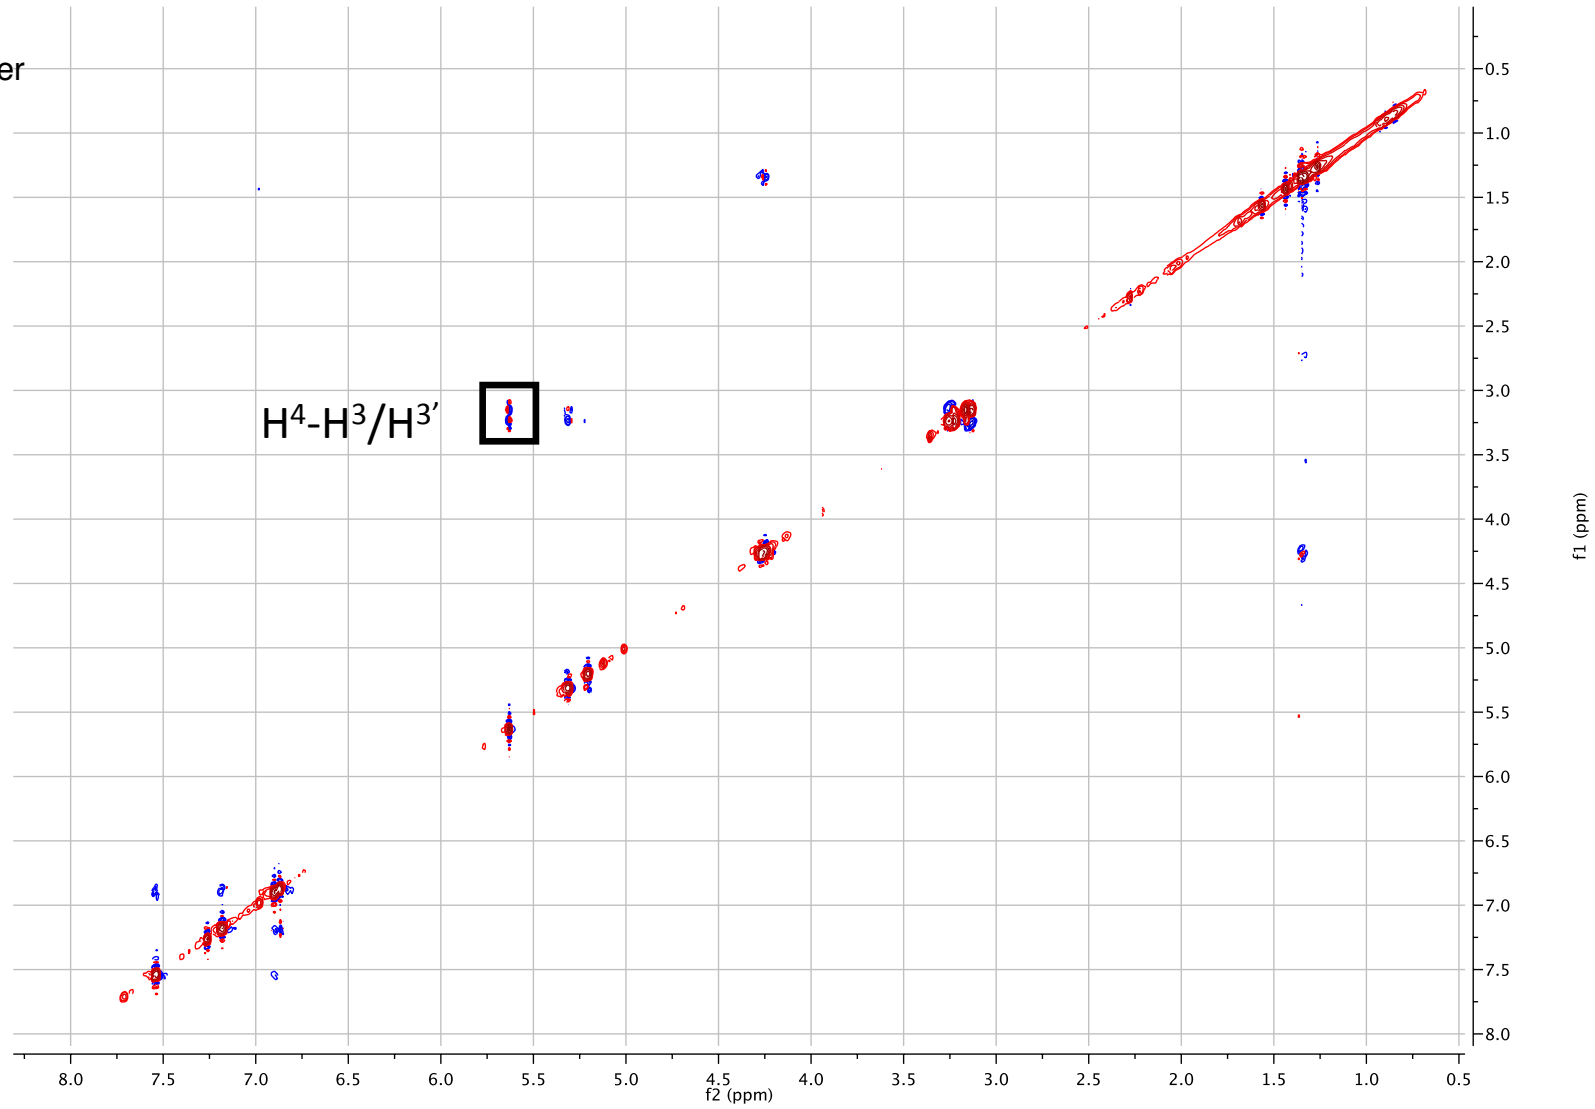

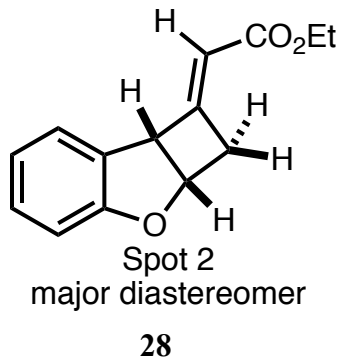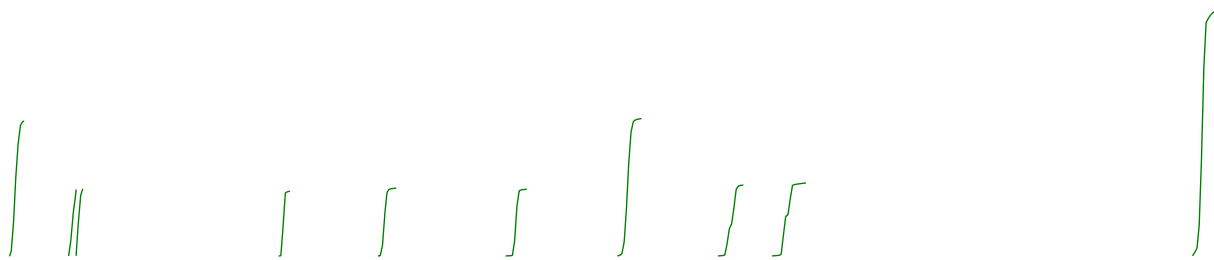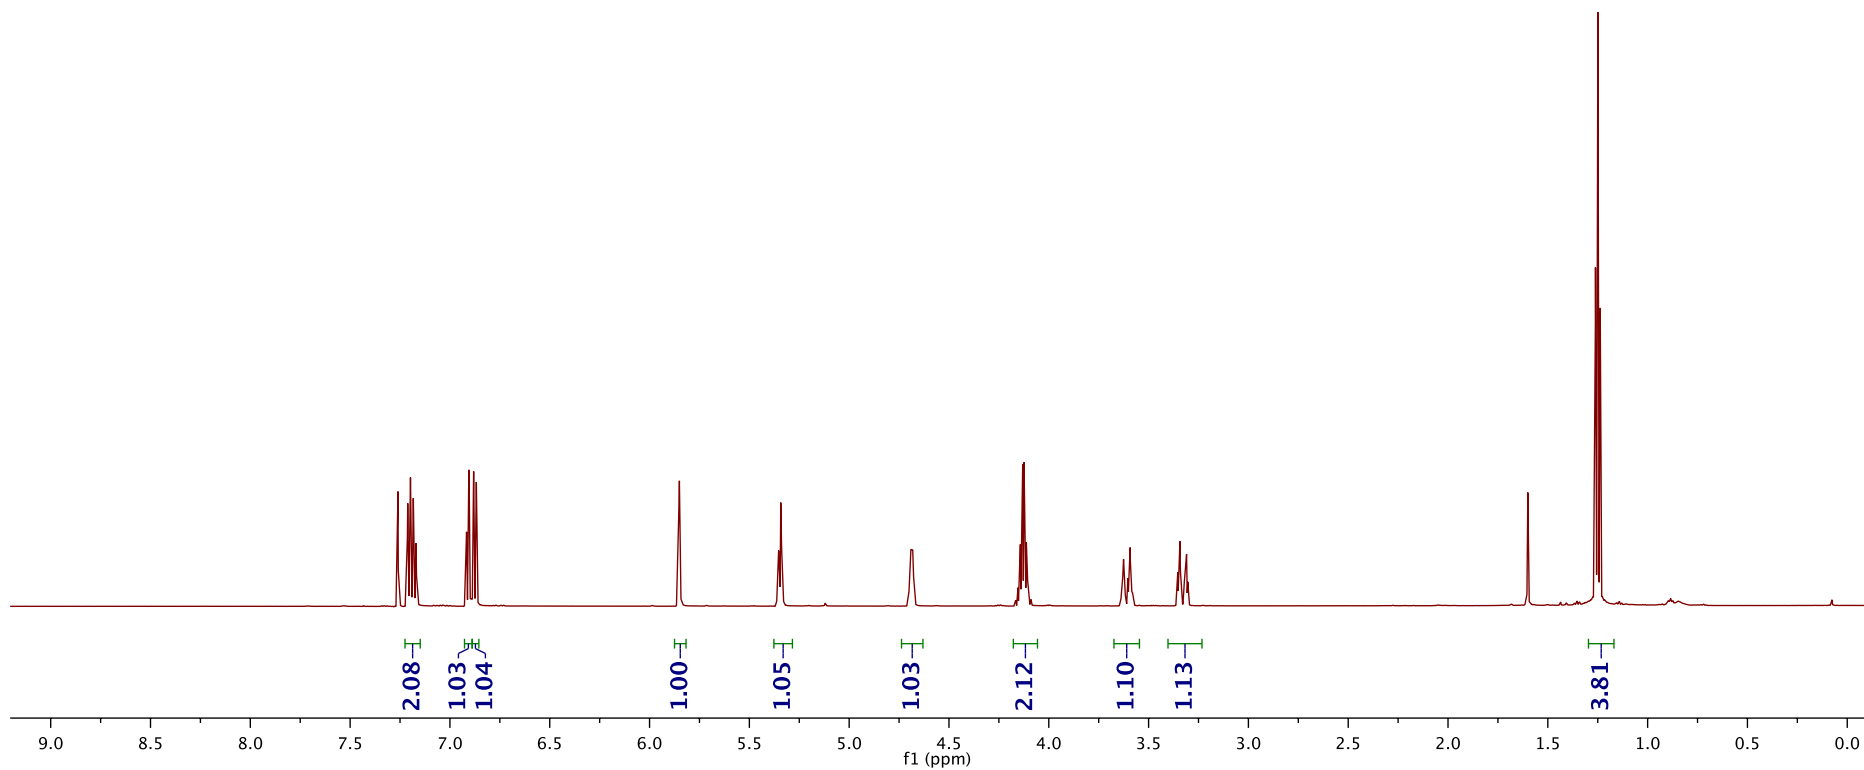

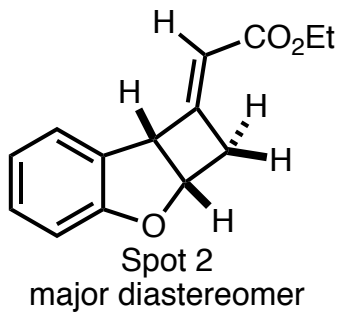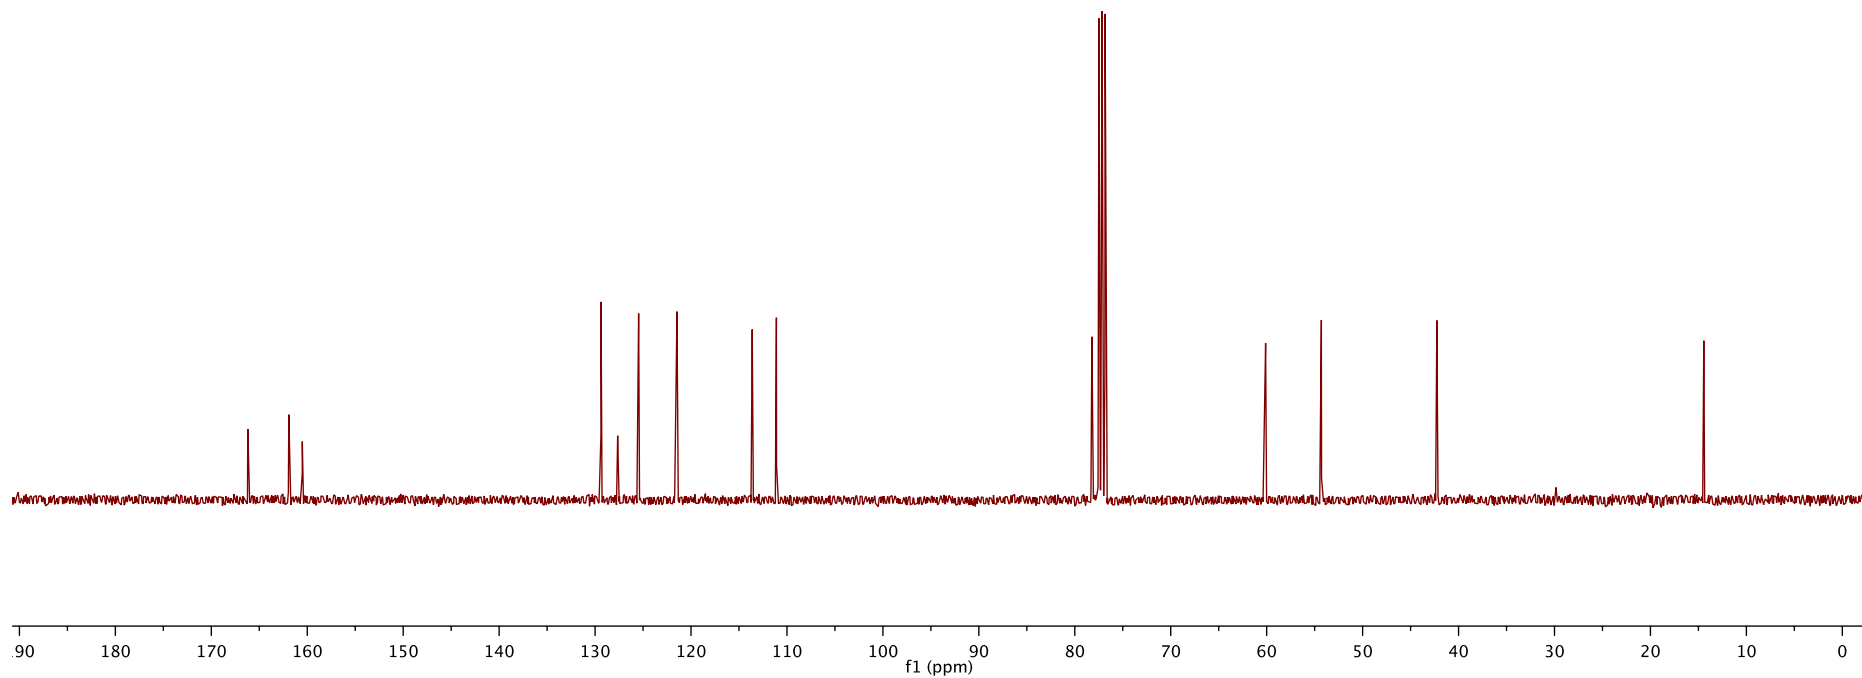

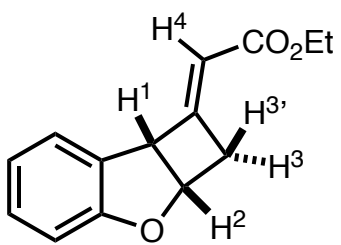

Spot 2  
major diastereomer  
COSY

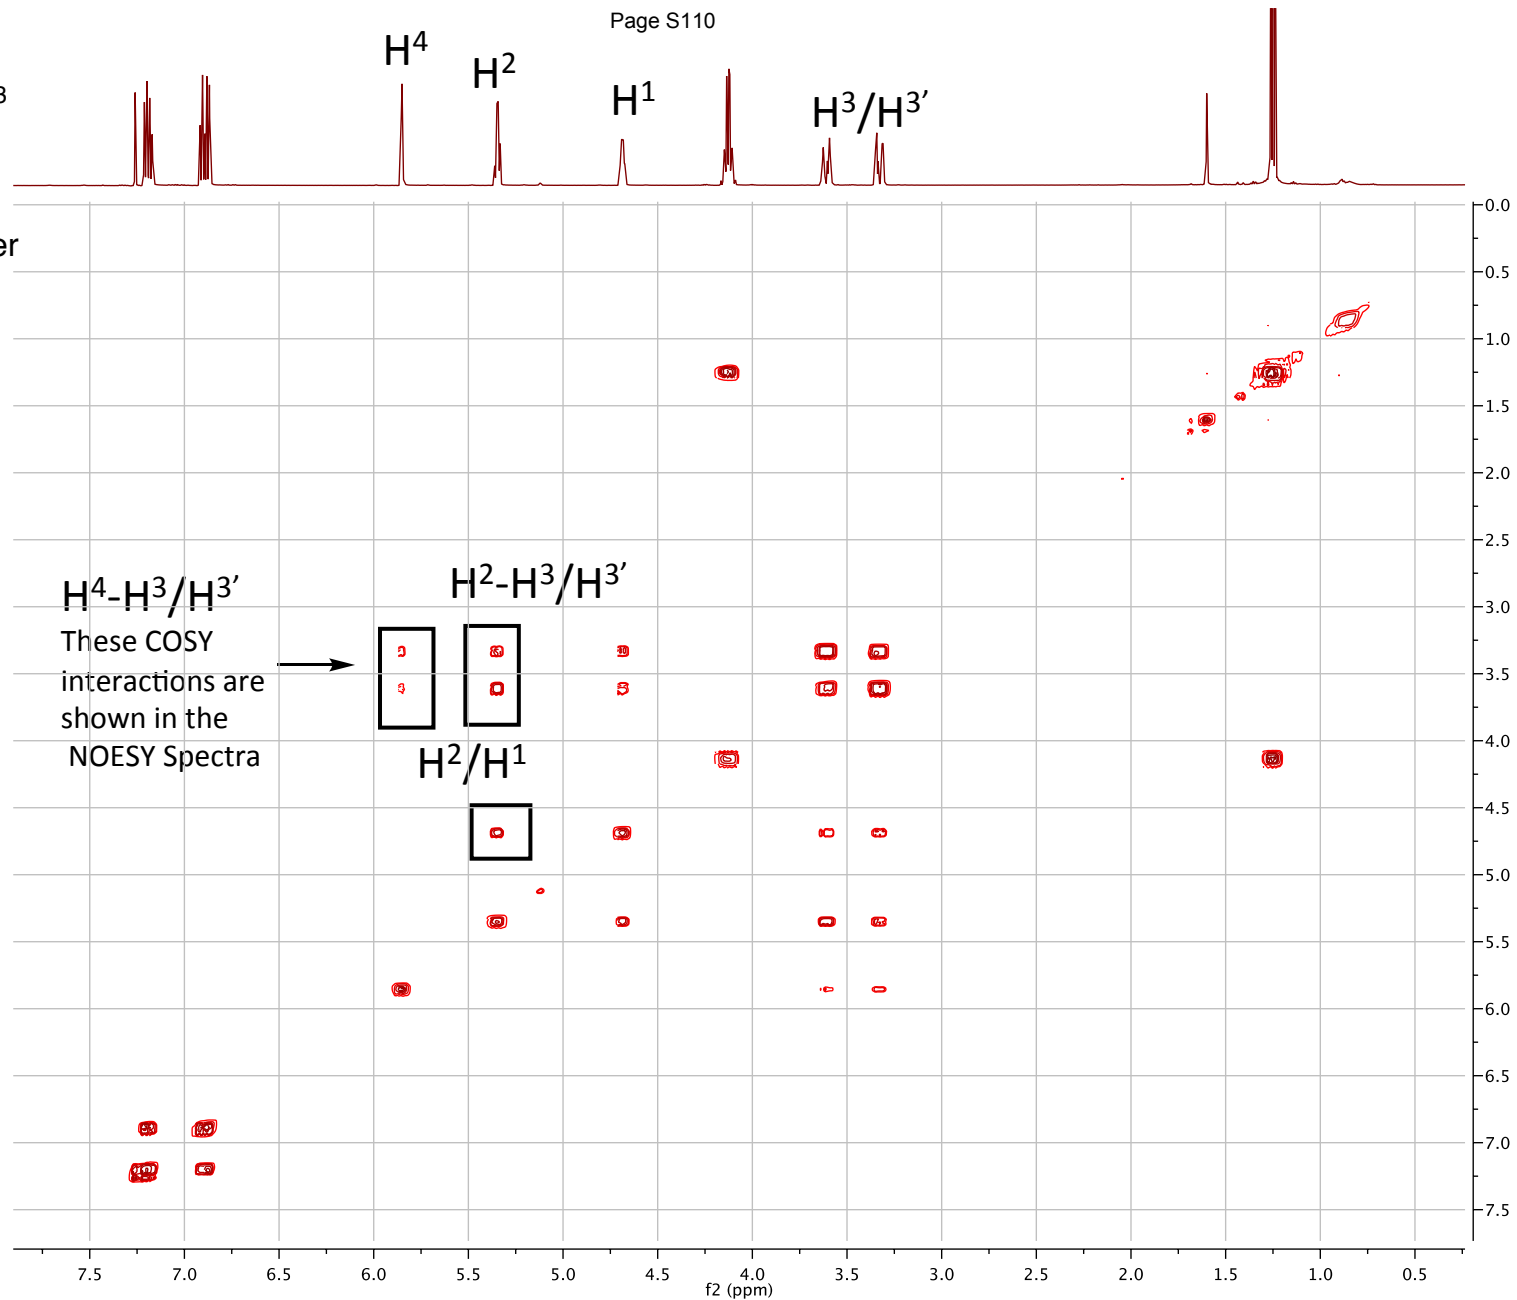

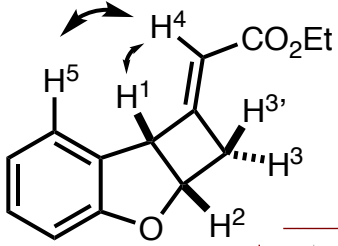

Spot 2  
major diastereomer  
NOESY

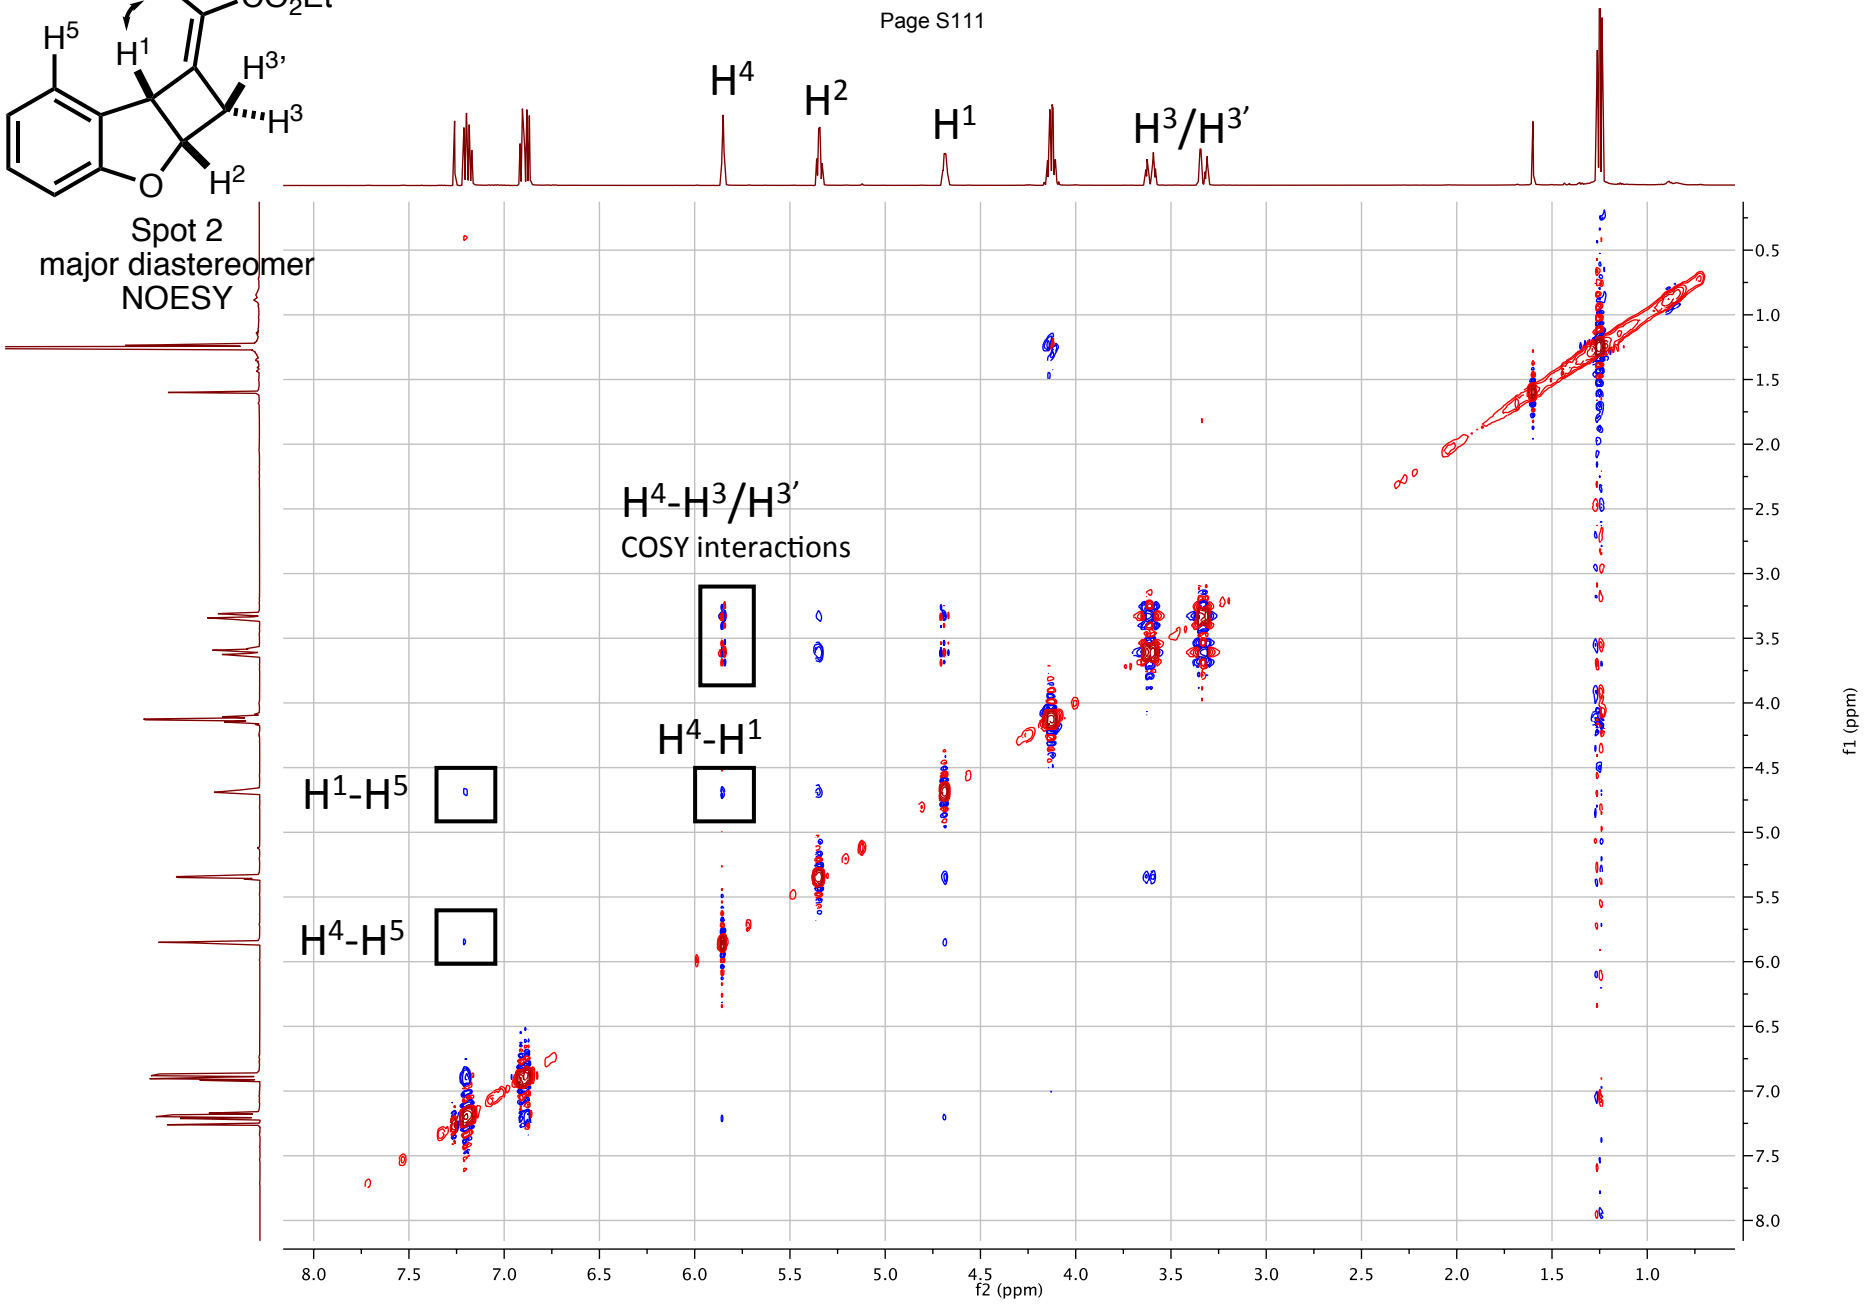

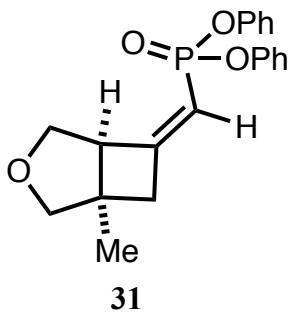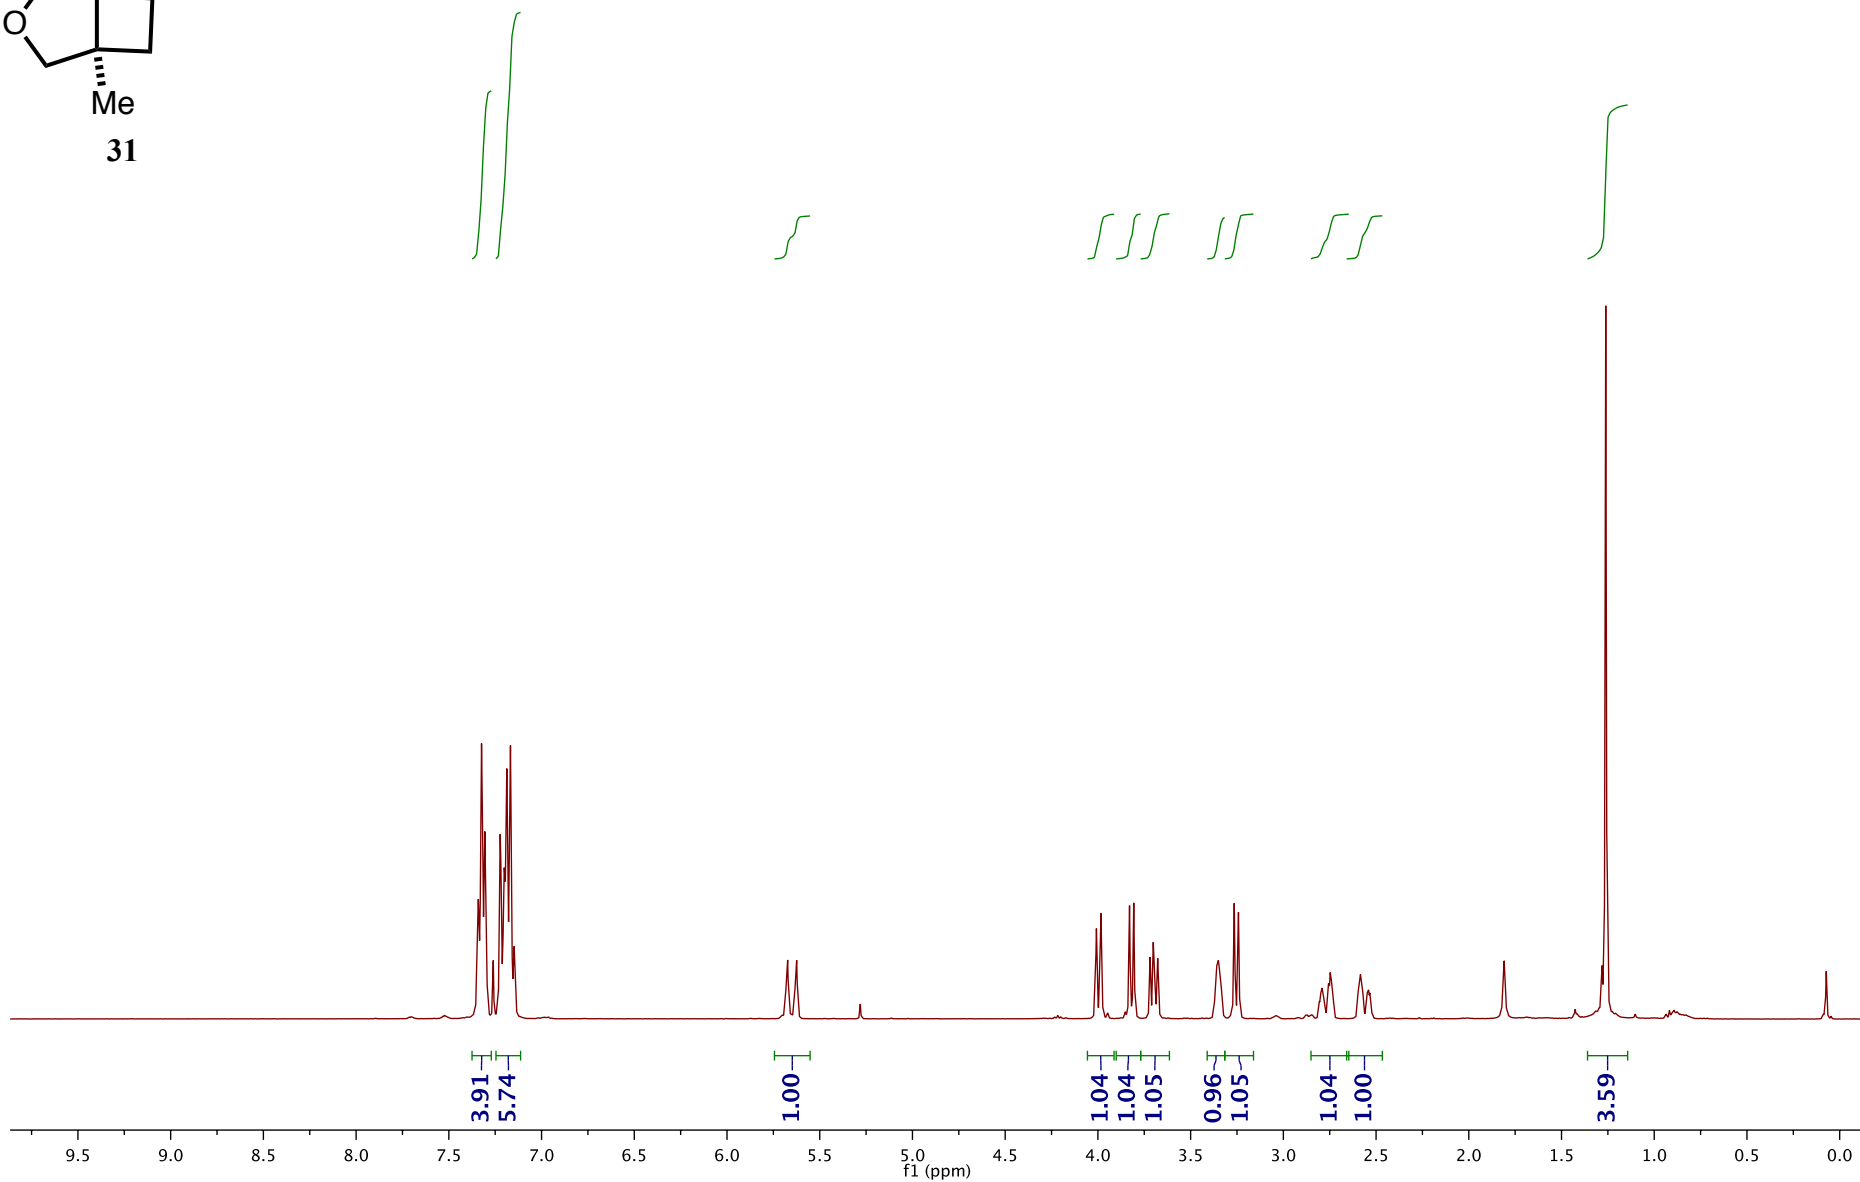



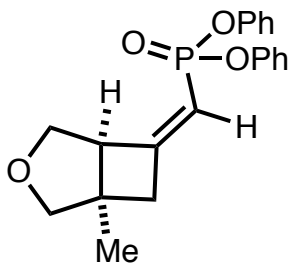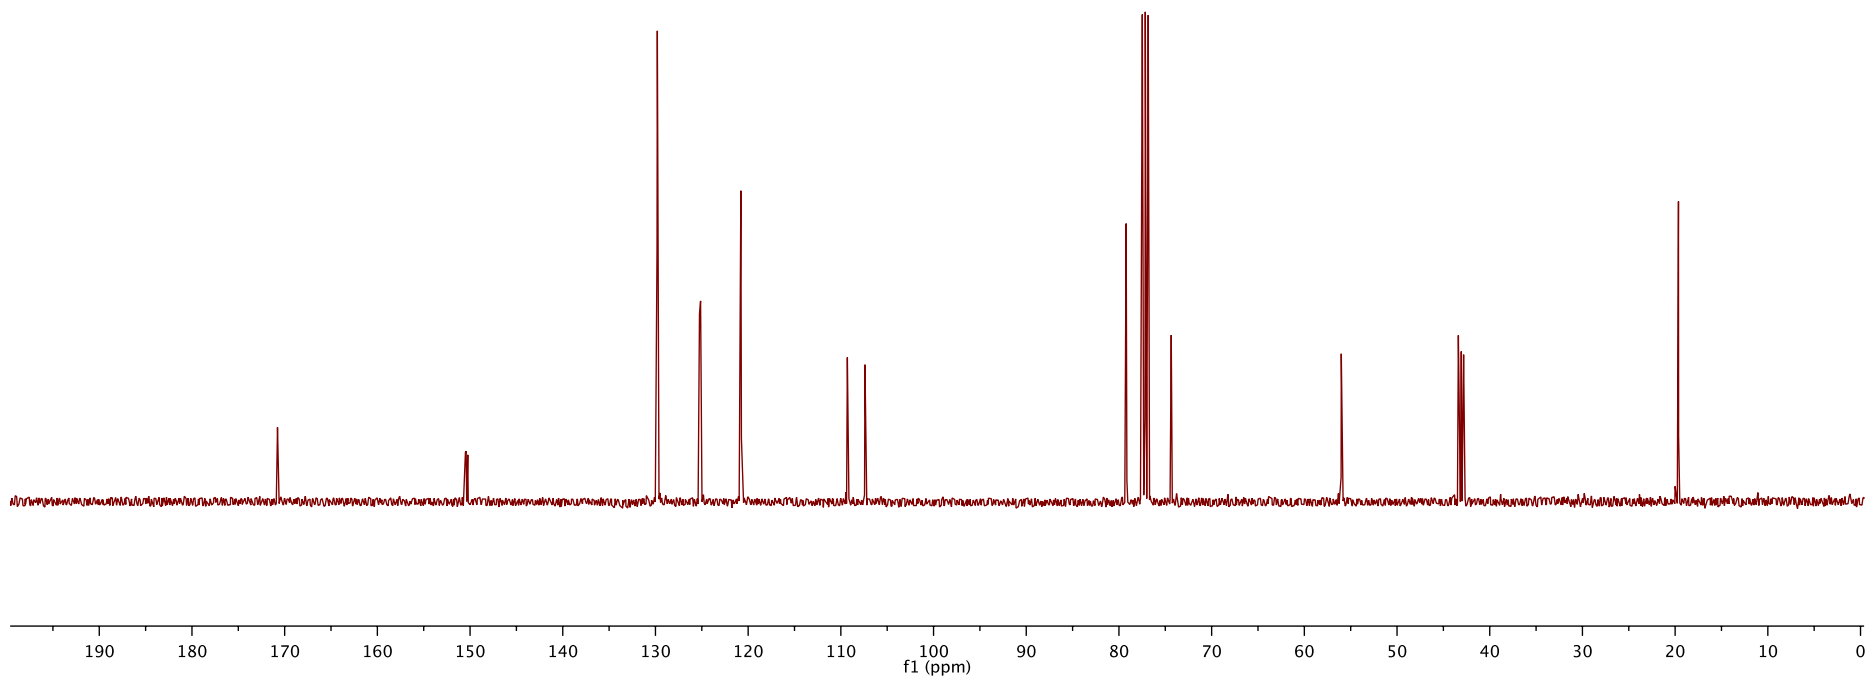

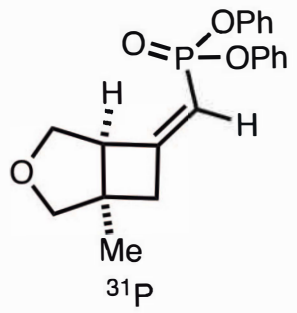

9.44

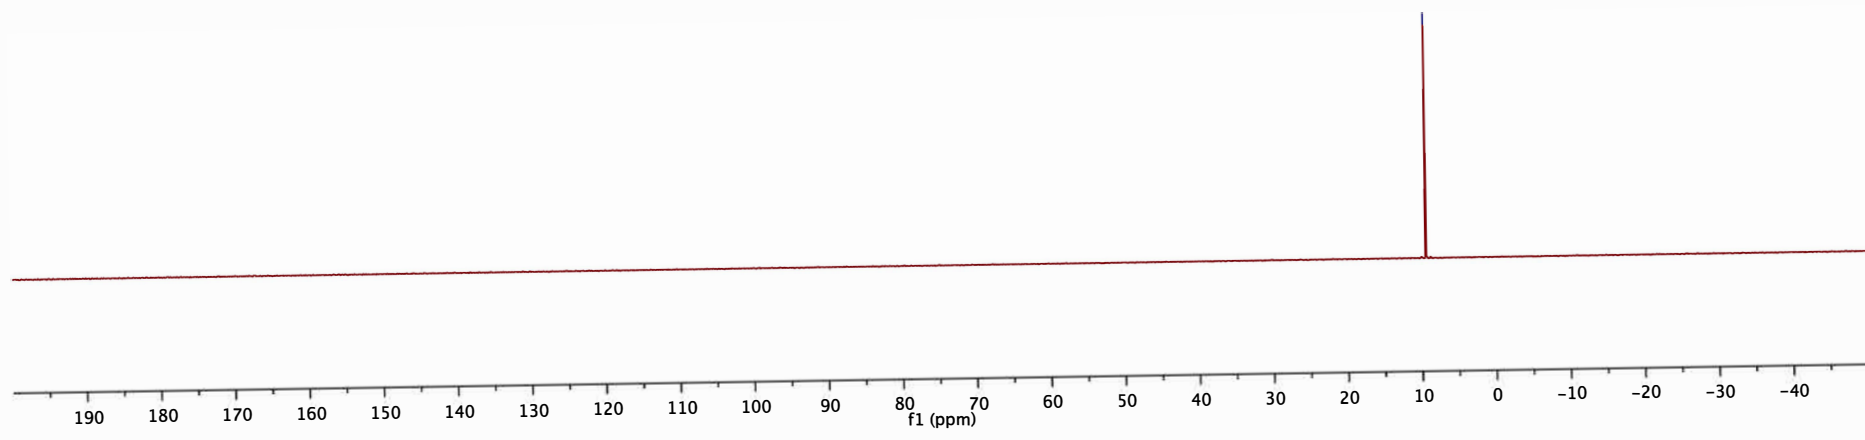

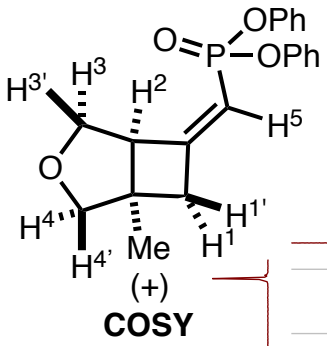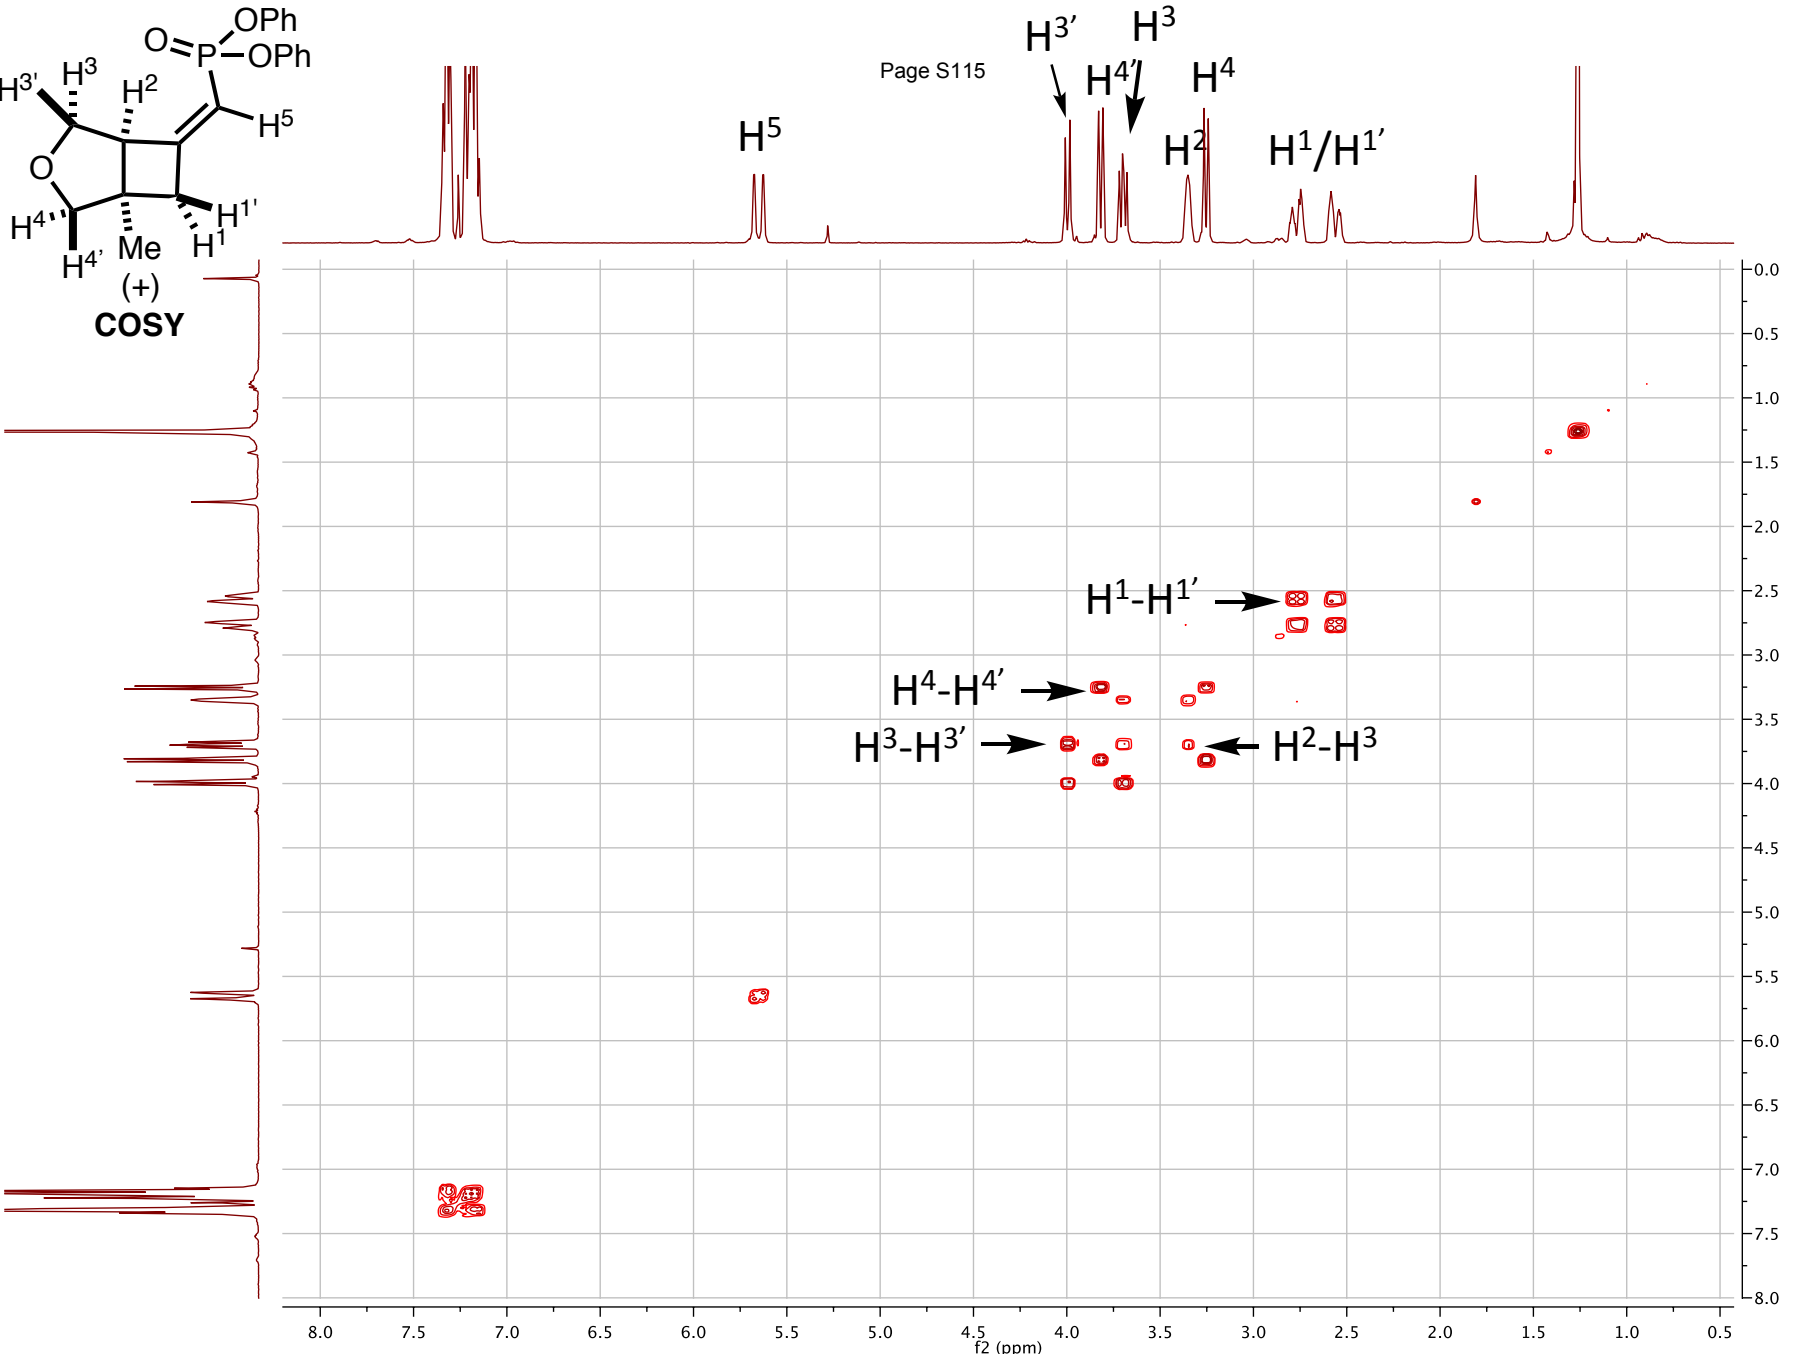

f1 (ppm)

f2 (ppm)

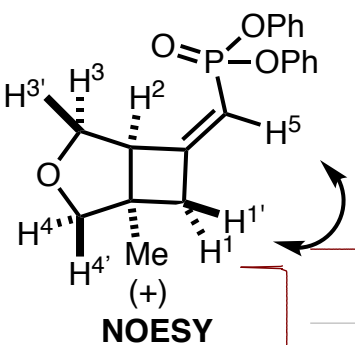

NOESY

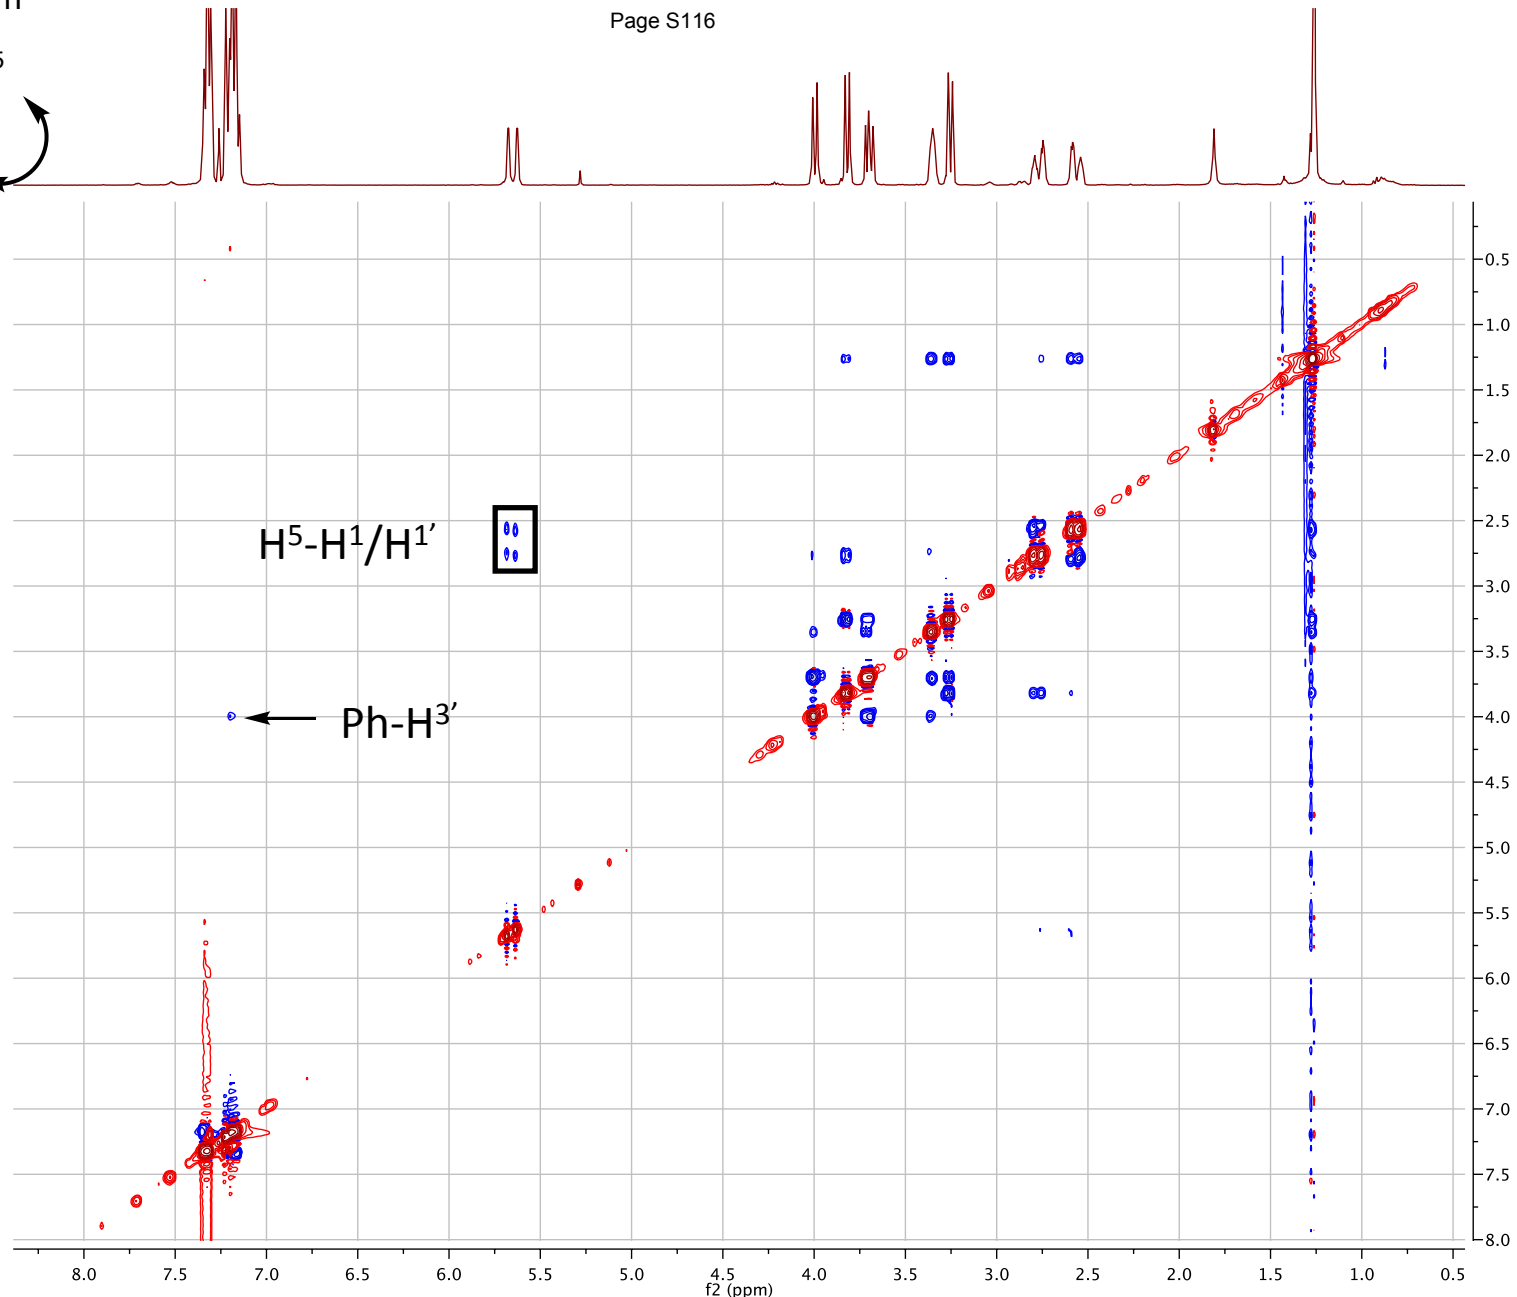

f1 (ppm)

f2 (ppm)

=====

Acq. Operator     : SYSTEM                                                             Seq. Line :   1  
Acq. Instrument   : 1220 HPLC                                                           Location : Vial 69  
Injection Date    : 1/5/2017 12:40:18 PM                                              Inj :    1  
                                                                                          Inj Volume : 10.000 µl

Acq. Method       : C:\CHEM32\2\METHODS\WY\_99.5\_0.5\_HEX-IPA\_0.5ML-MIN\_254NM.M  
Last changed      : 1/5/2017 12:19:28 PM by SYSTEM  
Analysis Method   : C:\CHEM32\2\METHODS\DEF\_LC.M  
Last changed      : 12/6/2016 1:32:42 PM by SYSTEM  
Sample Info       : Chirlapak IA PG024 99.5:0.5 Hex:IPA. 0.5mL/min. 254 nm

Additional Info : Peak(s) manually integrated

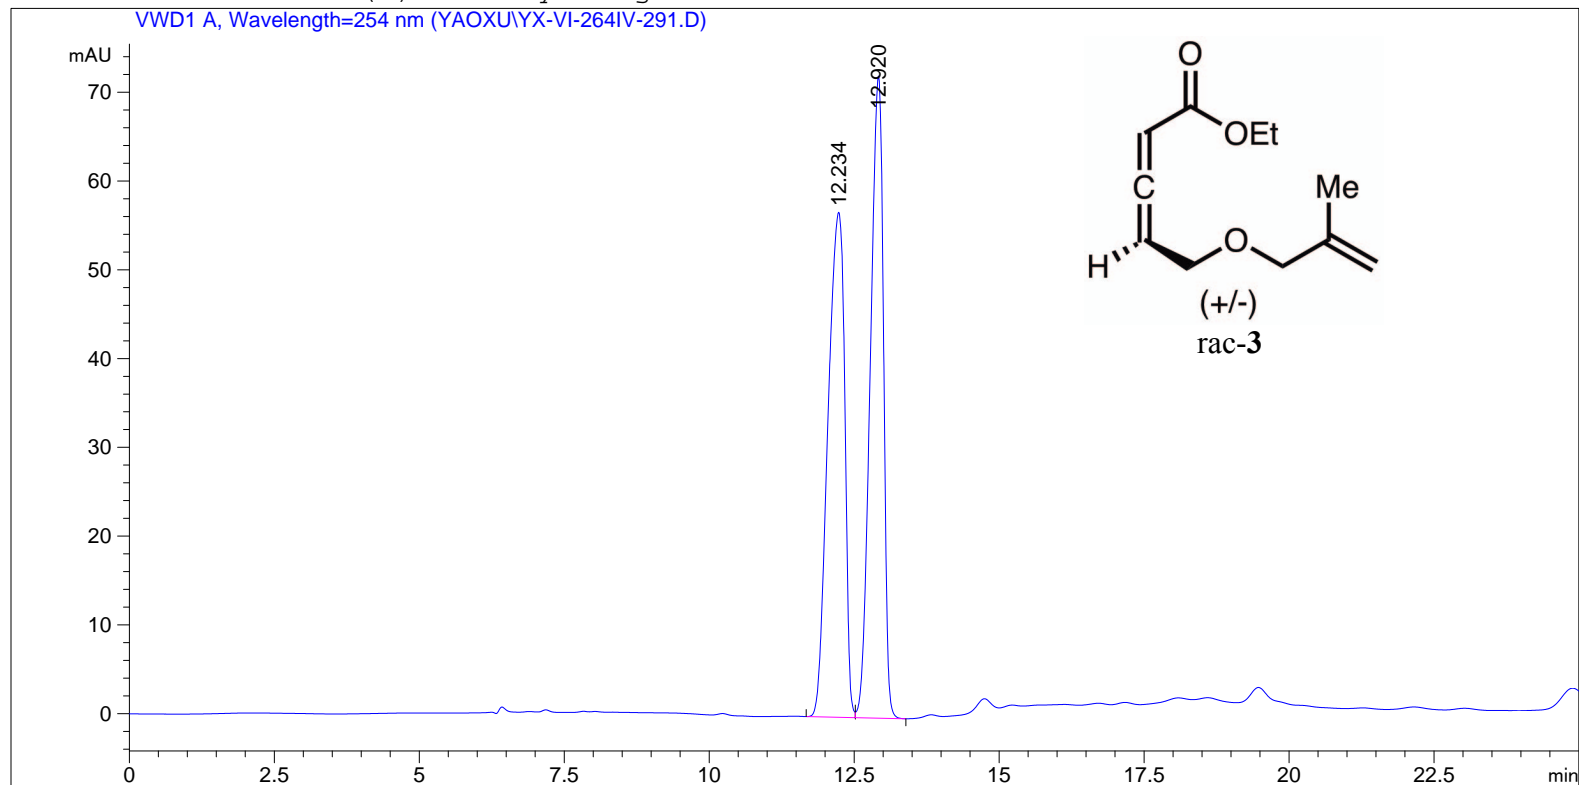

=====  
Area Percent Report  
=====

Sorted By                 :       Signal  
Multiplier:                :       1.0000  
Dilution:                  :       1.0000  
Use Multiplier & Dilution Factor with ISTDs

Signal 1: VWD1 A, Wavelength=254 nm

| Peak # | RetTime [min] | Type | Width [min] | Area [mAU*s] | Height [mAU] | Area %  |
|--------|---------------|------|-------------|--------------|--------------|---------|
| 1      | 12.234        | BV   | 0.3383      | 1142.22229   | 56.87540     | 50.0681 |
| 2      | 12.920        | VB   | 0.2528      | 1139.11414   | 72.30820     | 49.9319 |

Totals :                                                     2281.33643   129.18360

=====  
\*\*\* End of Report \*\*\*



```

=====
Acq. Operator   : SYSTEM                      Seq. Line :    1
Acq. Instrument : 1220 HPLC                   Location  : Vial 78
Injection Date  : 12/2/2016 2:14:20 PM       Inj       :    1
                                                Inj Volume: 10.000 µl

Acq. Method     : C:\CHEM32\2\METHODS\YX-98_2_HEX-IPA_1ML-MIN_254NM.M
Last changed    : 12/2/2016 1:58:31 PM by SYSTEM
Analysis Method : C:\CHEM32\2\METHODS\DEF_LC.M
Last changed    : 11/28/2016 4:18:36 PM by SYSTEM
Sample Info     : Lux 3u Cellulose-1 98:2 Hex/IPA, 1ml/min, 254nm
    
```

Additional Info : Peak(s) manually integrated

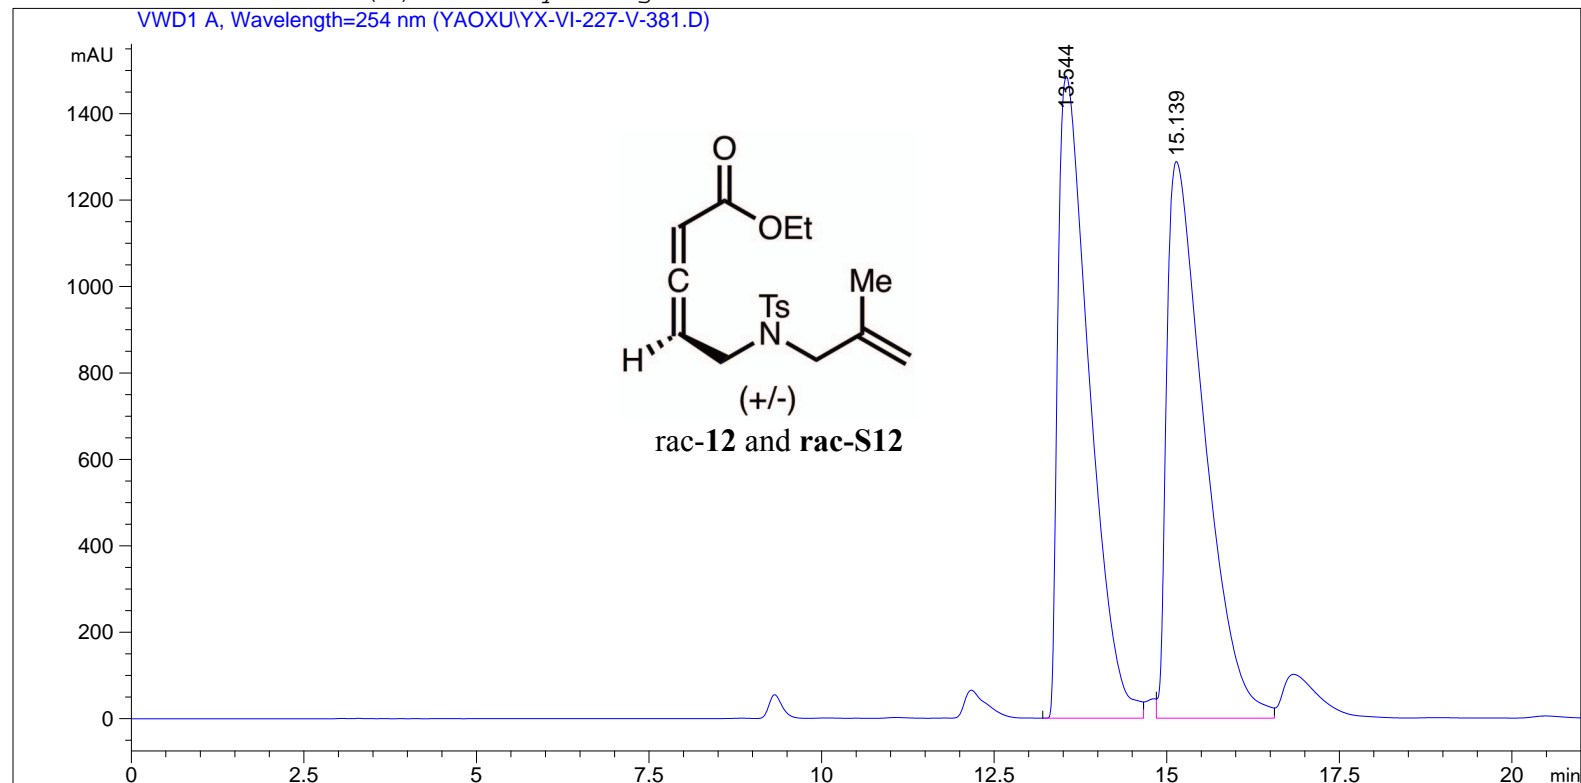

=====  
 Area Percent Report  
 =====

```

Sorted By      :      Signal
Multiplier:    :      1.0000
Dilution:     :      1.0000
Use Multiplier & Dilution Factor with ISTDs
    
```

Signal 1: VWD1 A, Wavelength=254 nm

| Peak # | RetTime [min] | Type | Width [min] | Area [mAU*s] | Height [mAU] | Area %  |
|--------|---------------|------|-------------|--------------|--------------|---------|
| 1      | 13.544        | BV   | 0.4765      | 4.70563e4    | 1485.67712   | 49.0823 |
| 2      | 15.139        | VV   | 0.5632      | 4.88160e4    | 1287.78540   | 50.9177 |

Totals :                                    9.58722e4   2773.46252

=====  
 \*\*\* End of Report \*\*\*

=====

|                 |                        |            |             |
|-----------------|------------------------|------------|-------------|
| Acq. Operator   | : SYSTEM               | Seq. Line  | : 2         |
| Acq. Instrument | : 1220 HPLC            | Location   | : Vial 79   |
| Injection Date  | : 12/2/2016 2:36:12 PM | Inj        | : 1         |
|                 |                        | Inj Volume | : 10.000 µl |

Acq. Method : C:\CHEM32\2\METHODS\YX-98\_2\_HEX-IPA\_1ML-MIN\_254NM.M  
Last changed : 12/2/2016 1:58:31 PM by SYSTEM  
Analysis Method : C:\CHEM32\2\METHODS\DEF\_LC.M  
Last changed : 11/28/2016 4:18:36 PM by SYSTEM  
Sample Info : Lux 3u Cellulose-1 98:2 Hex/IPA, 1ml/min, 254nm

Additional Info : Peak(s) manually integrated

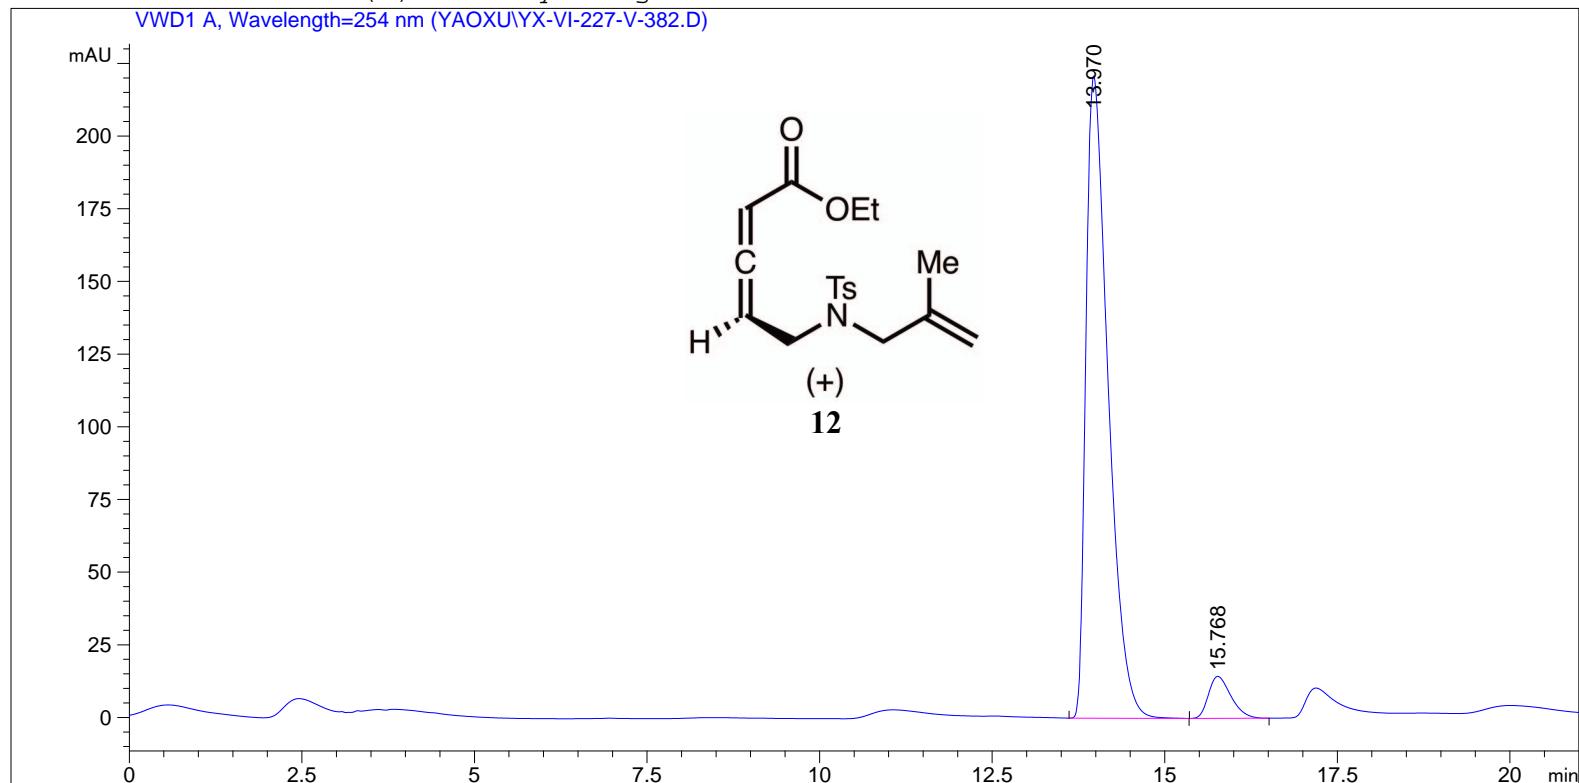

=====  
Area Percent Report  
=====

Sorted By : Signal  
Multiplier: : 1.0000  
Dilution: : 1.0000  
Use Multiplier & Dilution Factor with ISTDs

Signal 1: VWD1 A, Wavelength=254 nm

| Peak # | RetTime [min] | Type | Width [min] | Area [mAU*s] | Height [mAU] | Area %  |
|--------|---------------|------|-------------|--------------|--------------|---------|
| 1      | 13.970        | BB   | 0.3430      | 4940.63477   | 220.84840    | 93.7942 |
| 2      | 15.768        | BB   | 0.3480      | 326.89285    | 14.44441     | 6.2058  |

Totals : 5267.52762 235.29282

=====  
\*\*\* End of Report \*\*\*



=====

|                                       |                        |
|---------------------------------------|------------------------|
| Acq. Operator : SYSTEM                | Seq. Line : 2          |
| Acq. Instrument : 1220 HPLC           | Location : Vial 87     |
| Injection Date : 2/28/2017 2:58:40 PM | Inj : 1                |
|                                       | Inj Volume : 10.000 µl |

Acq. Method : C:\CHEM32\2\METHODS\YX-98\_2\_HEX-IPA\_1ML-MIN\_254NM.M  
 Last changed : 2/28/2017 2:10:58 PM by SYSTEM  
 Analysis Method : C:\CHEM32\2\METHODS\DEF\_LC.M  
 Last changed : 3/20/2017 1:24:46 AM by SYSTEM  
 Sample Info : Lux 3u Cellulose-1 98:2 Hex/IPA, 1ml/min, 254nm

Additional Info : Peak(s) manually integrated

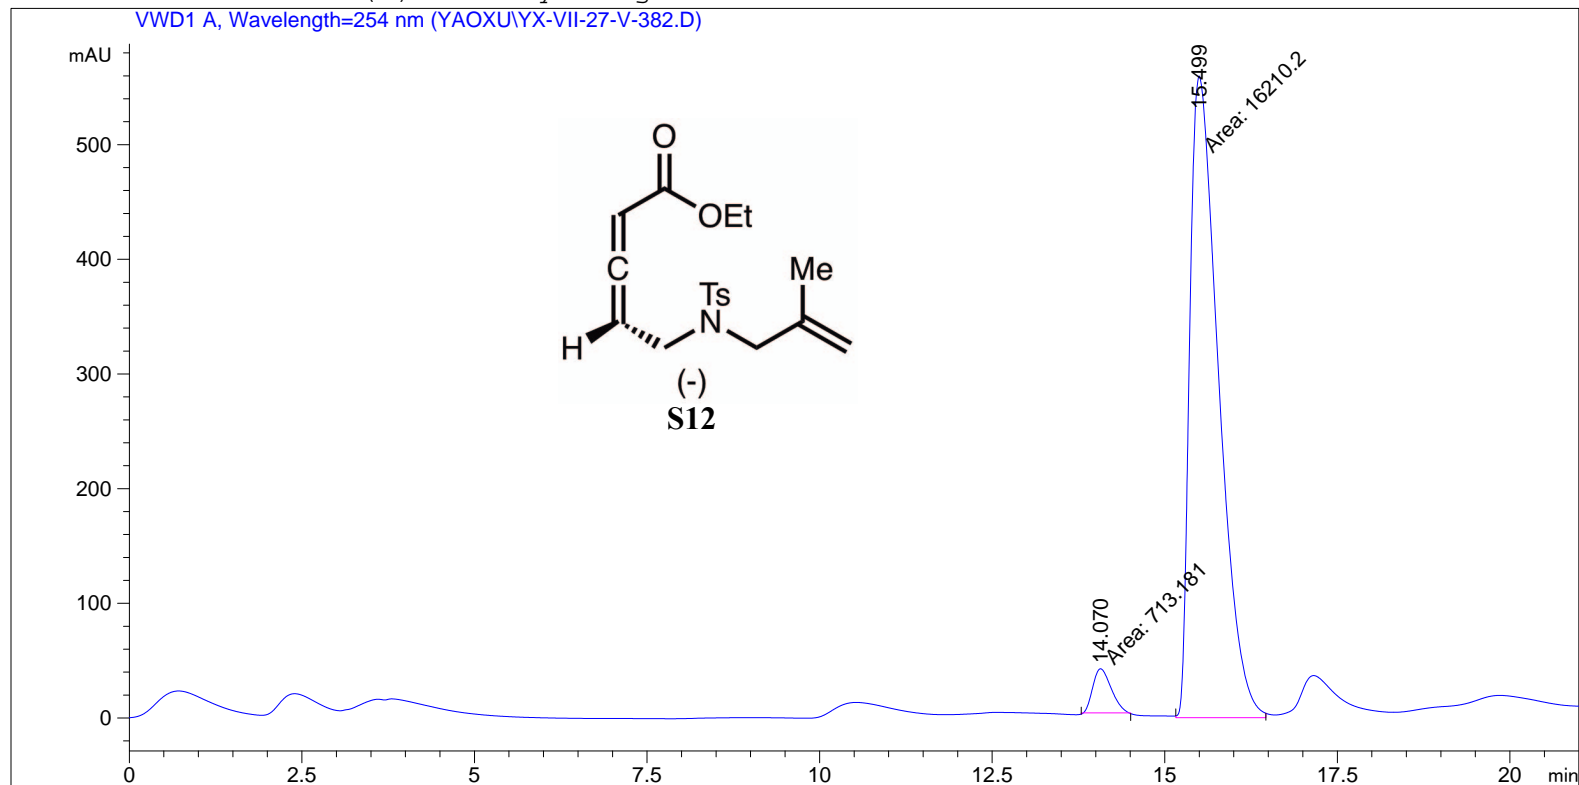

=====  
 Area Percent Report  
 =====

Sorted By : Signal  
 Multiplier: : 1.0000  
 Dilution: : 1.0000  
 Use Multiplier & Dilution Factor with ISTDs

Signal 1: VWD1 A, Wavelength=254 nm

| Peak # | RetTime [min] | Type | Width [min] | Area [mAU*s] | Height [mAU] | Area %  |
|--------|---------------|------|-------------|--------------|--------------|---------|
| 1      | 14.070        | MM   | 0.3086      | 713.18121    | 38.51493     | 4.2142  |
| 2      | 15.499        | MM   | 0.4829      | 1.62102e4    | 559.48883    | 95.7858 |

Totals : 1.69234e4 598.00376

=====  
 \*\*\* End of Report \*\*\*

=====

|                 |                                                             |            |             |
|-----------------|-------------------------------------------------------------|------------|-------------|
| Acq. Operator   | : SYSTEM                                                    | Seq. Line  | : 1         |
| Acq. Instrument | : 1220 HPLC                                                 | Location   | : Vial 94   |
| Injection Date  | : 10/29/2016 5:14:44 PM                                     | Inj        | : 1         |
|                 |                                                             | Inj Volume | : 10.000 µl |
| Acq. Method     | : C:\CHEM32\2\METHODS\WY_99.5_0.5_HEX-IPA_0.5ML-MIN_254NM.M |            |             |
| Last changed    | : 10/21/2016 12:24:23 PM by SYSTEM                          |            |             |
| Analysis Method | : C:\CHEM32\2\METHODS\DEF_LC.M                              |            |             |
| Sample Info     | : Lux 3u Cellulose-1 99.5:0.5 Hex/IPA, 0.5ml/min, 254nm     |            |             |

Additional Info : Peak(s) manually integrated

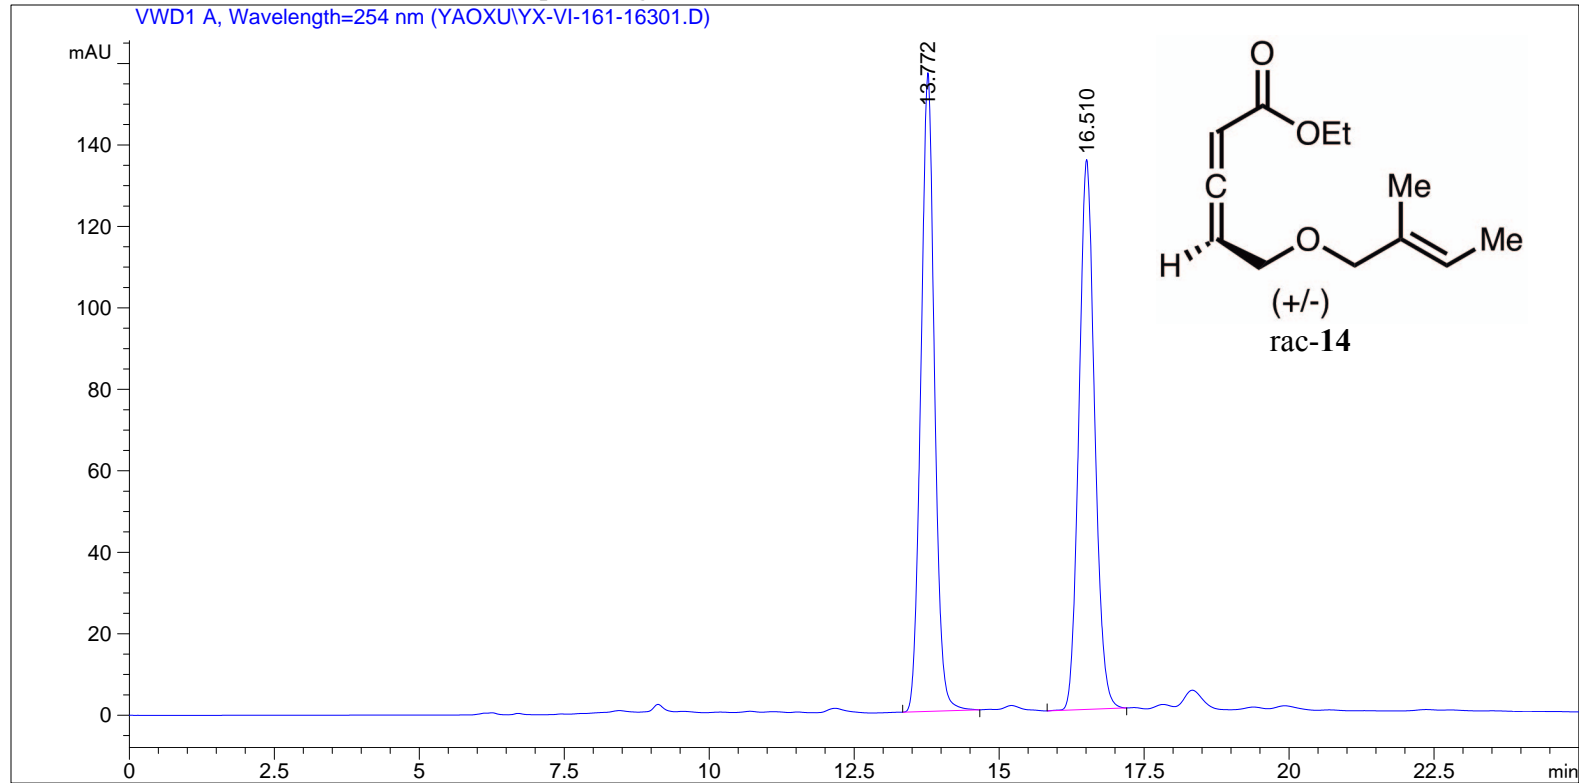

=====  
Area Percent Report  
=====

Sorted By : Signal  
Multiplier: : 1.0000  
Dilution: : 1.0000  
Use Multiplier & Dilution Factor with ISTDs

Signal 1: VWD1 A, Wavelength=254 nm

| Peak # | RetTime [min] | Type | Width [min] | Area [mAU*s] | Height [mAU] | Area %  |
|--------|---------------|------|-------------|--------------|--------------|---------|
| 1      | 13.772        | BB   | 0.2463      | 2557.84814   | 156.79839    | 50.0744 |
| 2      | 16.510        | BB   | 0.2884      | 2550.24609   | 134.98282    | 49.9256 |

Totals : 5108.09424 291.78120

=====  
\*\*\* End of Report \*\*\*

```
=====
Acq. Operator   : SYSTEM                      Seq. Line :    2
Acq. Instrument : 1220 HPLC                  Location  : Vial 95
Injection Date  : 10/29/2016 5:40:38 PM      Inj       :    1
                                              Inj Volume: 10.000 µl
Acq. Method     : C:\CHEM32\2\METHODS\WY_99.5_0.5_HEX-IPA_0.5ML-MIN_254NM.M
Last changed    : 10/21/2016 12:24:23 PM by SYSTEM
Analysis Method : C:\CHEM32\2\METHODS\DEF_LC.M
Sample Info     : Lux 3u Cellulose-1 99.5:0.5 Hex/IPA, 0.5ml/min, 254nm
=====
```

Additional Info : Peak(s) manually integrated

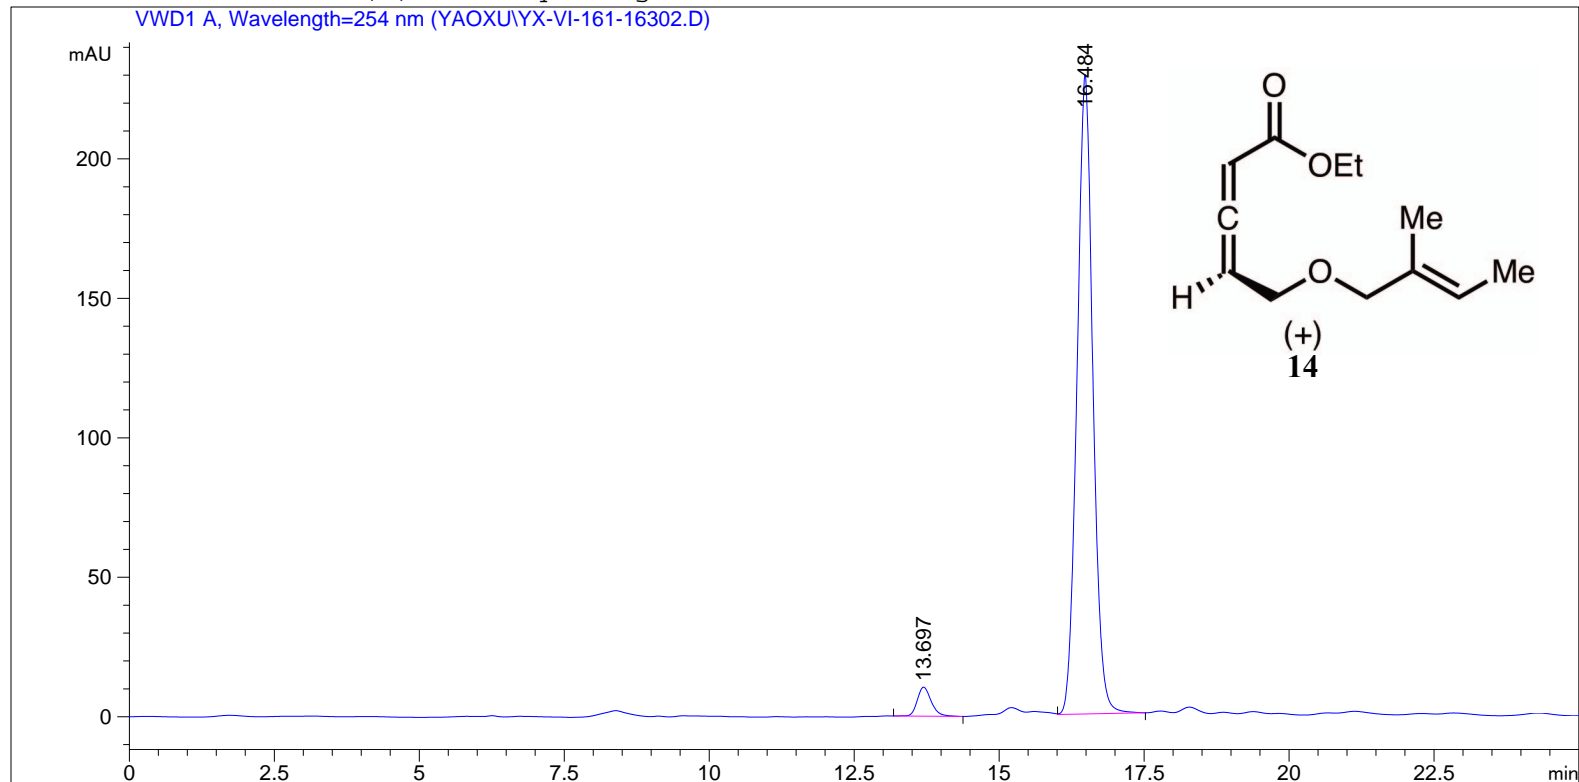

=====  
Area Percent Report  
=====

Sorted By : Signal  
Multiplier: : 1.0000  
Dilution: : 1.0000  
Use Multiplier & Dilution Factor with ISTDs

Signal 1: VWD1 A, Wavelength=254 nm

| Peak # | RetTime [min] | Type | Width [min] | Area [mAU*s] | Height [mAU] | Area %  |
|--------|---------------|------|-------------|--------------|--------------|---------|
| 1      | 13.697        | BB   | 0.2557      | 173.66200    | 10.40682     | 3.8357  |
| 2      | 16.484        | VB   | 0.2876      | 4353.86426   | 229.20427    | 96.1643 |

Totals : 4527.52626 239.61109

=====  
\*\*\* End of Report \*\*\*

=====

|                 |                                                             |            |             |
|-----------------|-------------------------------------------------------------|------------|-------------|
| Acq. Operator   | : SYSTEM                                                    | Seq. Line  | : 1         |
| Acq. Instrument | : 1220 HPLC                                                 | Location   | : Vial 93   |
| Injection Date  | : 1/26/2017 2:09:13 PM                                      | Inj        | : 1         |
|                 |                                                             | Inj Volume | : 10.000 µl |
| Acq. Method     | : C:\CHEM32\2\METHODS\WY_99.5_0.5_HEX-IPA_0.5ML-MIN_254NM.M |            |             |
| Last changed    | : 1/26/2017 1:48:21 PM by SYSTEM                            |            |             |
| Analysis Method | : C:\CHEM32\2\METHODS\DEF_LC.M                              |            |             |
| Last changed    | : 12/6/2016 1:32:42 PM by SYSTEM                            |            |             |
| Sample Info     | : Lux 3u Cellulose-1 99.5:0.5 Hex/IPA, 0.5ml/min, 254nm     |            |             |

Additional Info : Peak(s) manually integrated

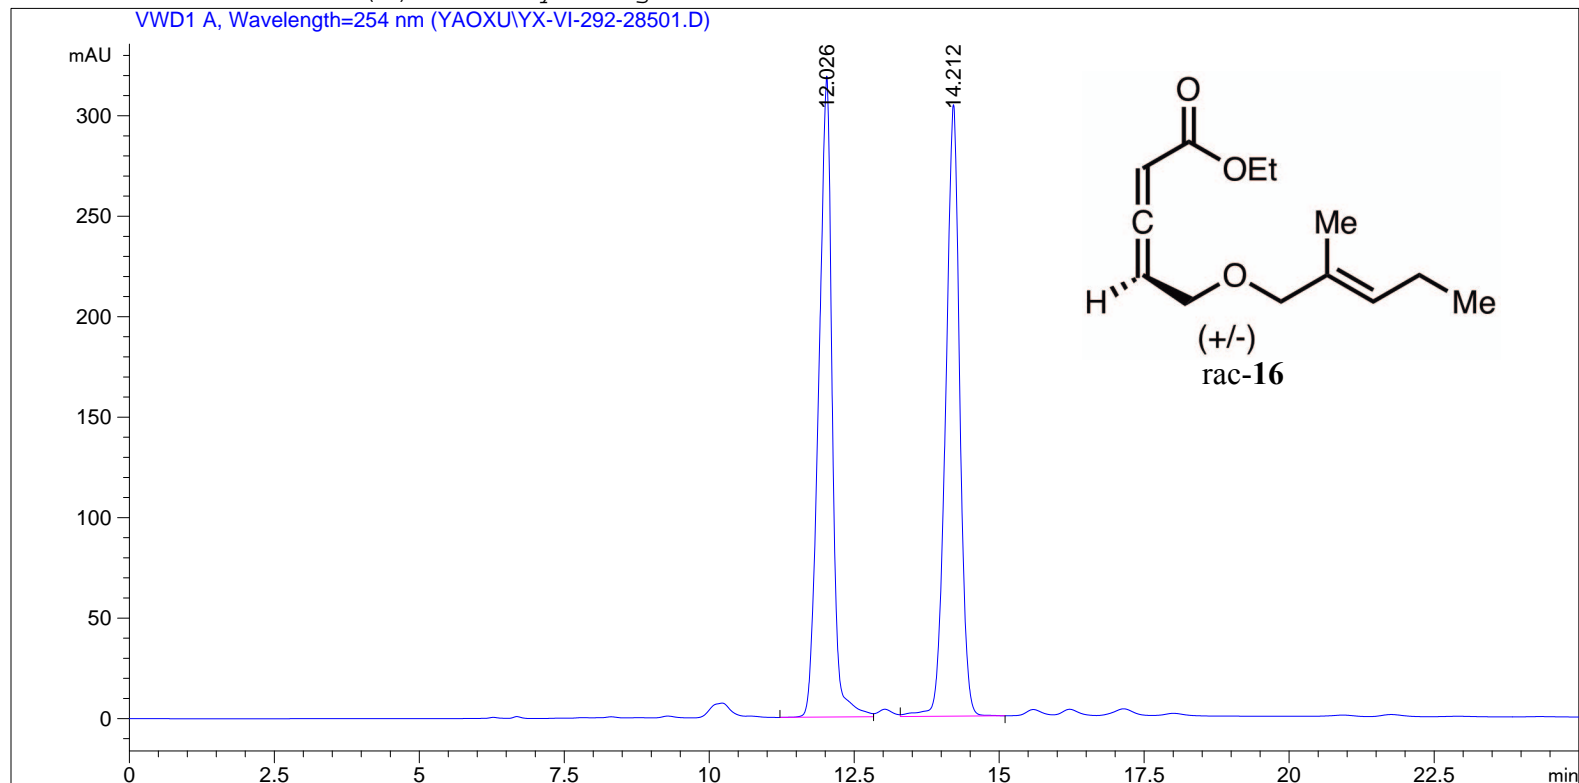

=====  
Area Percent Report  
=====

Sorted By : Signal  
Multiplier: : 1.0000  
Dilution: : 1.0000  
Use Multiplier & Dilution Factor with ISTDs

Signal 1: VWD1 A, Wavelength=254 nm

| Peak # | RetTime [min] | Type | Width [min] | Area [mAU*s] | Height [mAU] | Area %  |
|--------|---------------|------|-------------|--------------|--------------|---------|
| 1      | 12.026        | BV   | 0.2369      | 5109.71924   | 318.99051    | 49.8410 |
| 2      | 14.212        | VB   | 0.2531      | 5142.32324   | 304.36188    | 50.1590 |

Totals : 1.02520e4 623.35239

=====  
\*\*\* End of Report \*\*\*

=====  
Acq. Operator : SYSTEM                                                 Seq. Line :    2  
Acq. Instrument : 1220 HPLC                                            Location : Vial 94  
Injection Date : 1/26/2017 2:35:06 PM                                Inj :        1  
                                                                          Inj Volume : 10.000 µl  
Acq. Method : C:\CHEM32\2\METHODS\WY\_99.5\_0.5\_HEX-IPA\_0.5ML-MIN\_254NM.M  
Last changed : 1/26/2017 1:48:21 PM by SYSTEM  
Analysis Method : C:\CHEM32\2\METHODS\DEF\_LC.M  
Last changed : 12/6/2016 1:32:42 PM by SYSTEM  
Sample Info : Lux 3u Cellulose-1 99.5:0.5 Hex/IPA, 0.5ml/min, 254nm

Additional Info : Peak(s) manually integrated

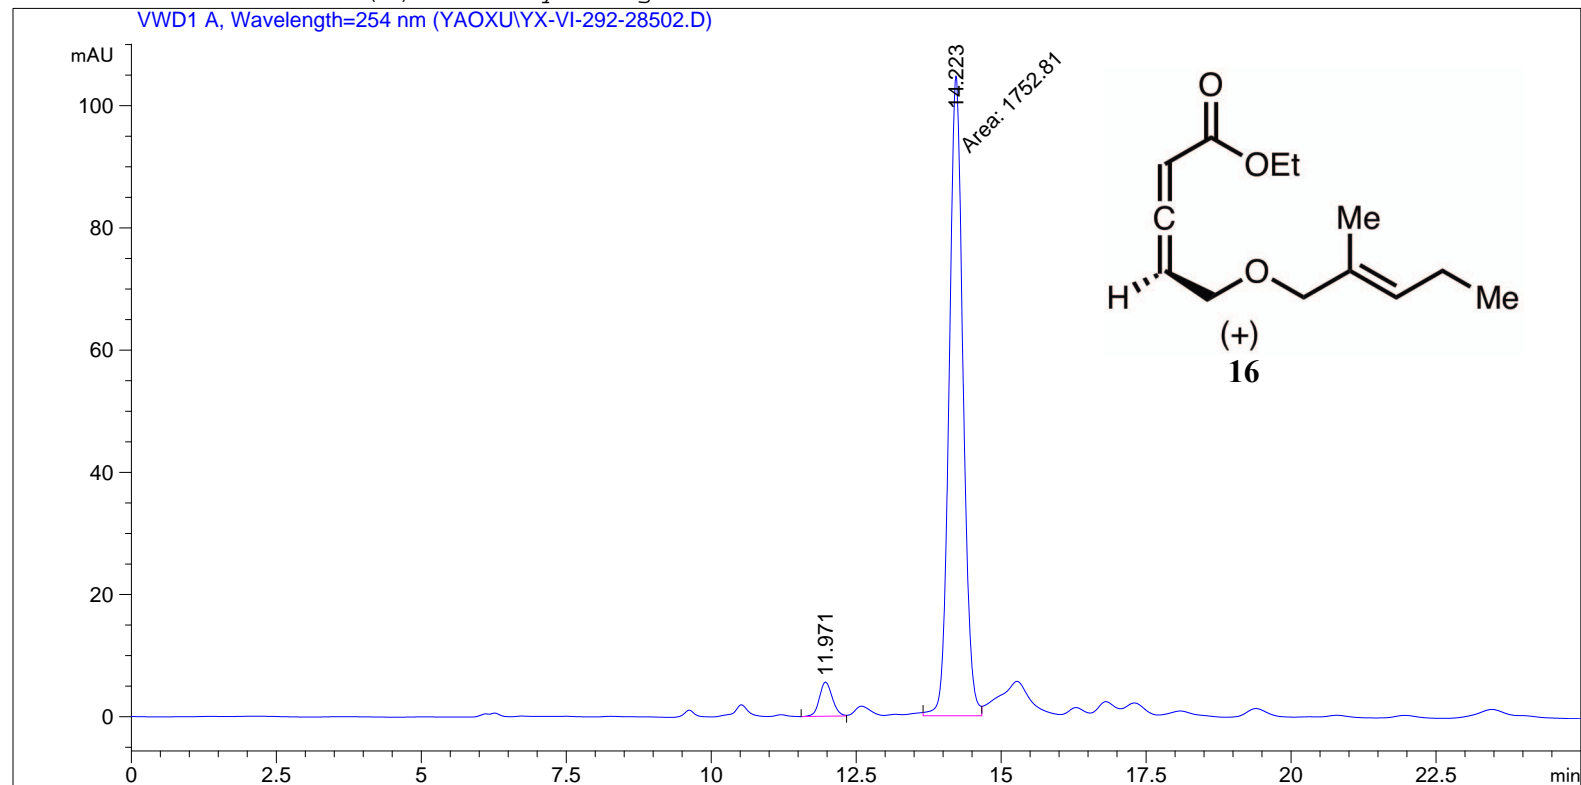

=====  
Area Percent Report  
=====

Sorted By : Signal  
Multiplier: : 1.0000  
Dilution: : 1.0000  
Use Multiplier & Dilution Factor with ISTDs

Signal 1: VWD1 A, Wavelength=254 nm

| Peak # | RetTime [min] | Type | Width [min] | Area [mAU*s] | Height [mAU] | Area %  |
|--------|---------------|------|-------------|--------------|--------------|---------|
| 1      | 11.971        | BV   | 0.2400      | 86.70005     | 5.58882      | 4.7132  |
| 2      | 14.223        | MM   | 0.2791      | 1752.81226   | 104.68245    | 95.2868 |

Totals :                                1839.51231   110.27127

=====  
\*\*\* End of Report \*\*\*

```

=====
Acq. Operator   : SYSTEM                      Seq. Line :    1
Acq. Instrument : 1220 HPLC                    Location  : Vial 79
Injection Date  : 4/21/2017 4:16:46 PM         Inj       :    1
                                                Inj Volume: 10.000 µl

Acq. Method     : C:\CHEM32\2\METHODS\WY_99.5_0.5_HEX-IPA_0.5ML-MIN_254NM.M
Last changed    : 4/21/2017 3:55:55 PM by SYSTEM
Analysis Method : C:\CHEM32\2\METHODS\DEF_LC.M
Last changed    : 3/20/2017 1:24:46 AM by SYSTEM
Sample Info     : Lux 3u Cellulose-1 99.5:0.5 Hex/IPA, 0.5ml/min, 254nm
    
```

Additional Info : Peak(s) manually integrated

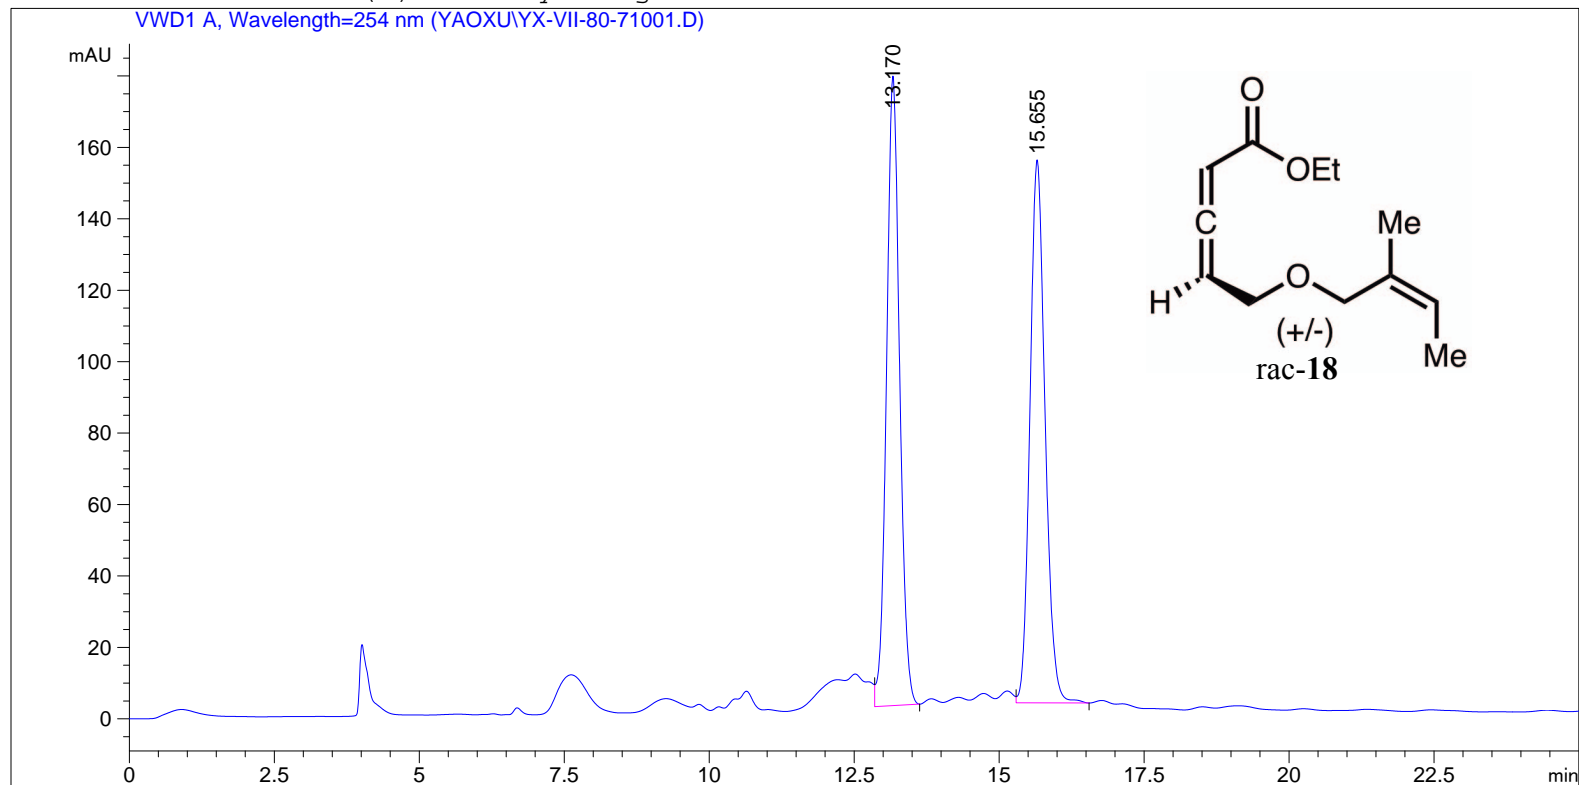

Area Percent Report

```

Sorted By      :      Signal
Multiplier:    :      1.0000
Dilution:      :      1.0000
Use Multiplier & Dilution Factor with ISTDs
    
```

Signal 1: VWD1 A, Wavelength=254 nm

| Peak # | RetTime [min] | Type | Width [min] | Area [mAU*s] | Height [mAU] | Area %  |
|--------|---------------|------|-------------|--------------|--------------|---------|
| 1      | 13.170        | VB   | 0.2382      | 2768.07764   | 176.24934    | 50.0826 |
| 2      | 15.655        | VB   | 0.2778      | 2758.95020   | 152.00424    | 49.9174 |

Totals :                      5527.02783    328.25359

\*\*\* End of Report \*\*\*

```

=====
Acq. Operator   : SYSTEM                      Seq. Line :    2
Acq. Instrument : 1220 HPLC                   Location  : Vial 80
Injection Date  : 4/21/2017 4:42:39 PM      Inj       :    1
                                                Inj Volume: 10.000 µl
Acq. Method     : C:\CHEM32\2\METHODS\WY_99.5_0.5_HEX-IPA_0.5ML-MIN_254NM.M
Last changed    : 4/21/2017 3:55:55 PM by SYSTEM
Analysis Method : C:\CHEM32\2\METHODS\DEF_LC.M
Last changed    : 3/20/2017 1:24:46 AM by SYSTEM
Sample Info     : Lux 3u Cellulose-1 99.5:0.5 Hex/IPA, 0.5ml/min, 254nm
    
```

Additional Info : Peak(s) manually integrated

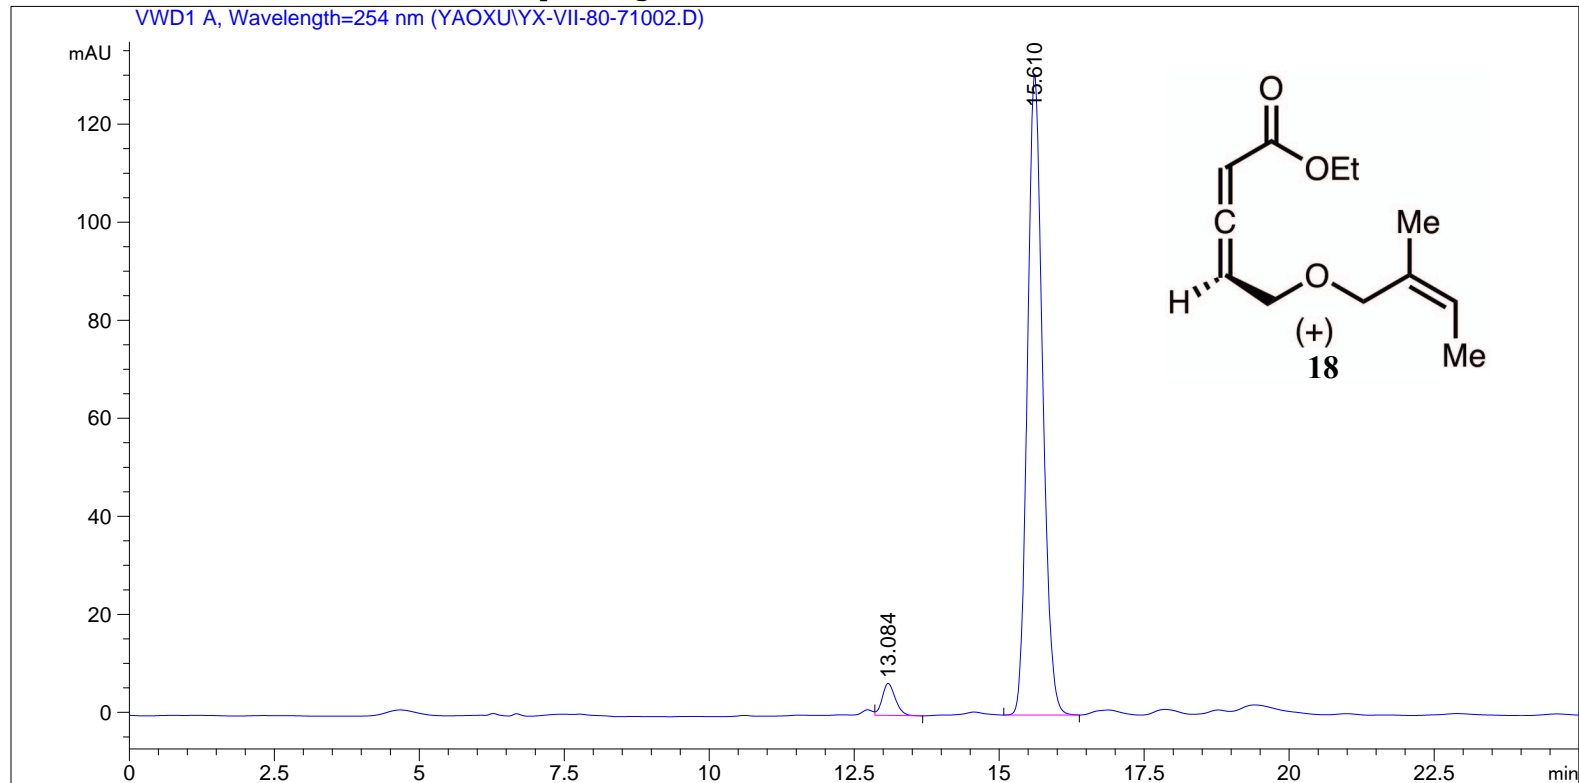

=====  
 Area Percent Report  
 =====

```

Sorted By           :      Signal
Multiplier:         :      1.0000
Dilution:           :      1.0000
Use Multiplier & Dilution Factor with ISTDs
    
```

Signal 1: VWD1 A, Wavelength=254 nm

| Peak # | RetTime [min] | Type | Width [min] | Area [mAU*s] | Height [mAU] | Area %  |
|--------|---------------|------|-------------|--------------|--------------|---------|
| 1      | 13.084        | VB   | 0.2408      | 102.66872    | 6.51574      | 4.1331  |
| 2      | 15.610        | BB   | 0.2785      | 2381.38989   | 130.74098    | 95.8669 |

Totals :                                    2484.05861    137.25672

=====  
 \*\*\* End of Report \*\*\*

=====

|                 |                        |            |             |
|-----------------|------------------------|------------|-------------|
| Acq. Operator   | : SYSTEM               | Seq. Line  | : 1         |
| Acq. Instrument | : 1220 HPLC            | Location   | : Vial 97   |
| Injection Date  | : 11/4/2016 1:14:19 PM | Inj        | : 1         |
|                 |                        | Inj Volume | : 10.000 µl |

Acq. Method : C:\CHEM32\2\METHODS\WY\_99.5\_0.5\_HEX-IPA\_0.5ML-MIN\_254NM.M  
Last changed : 11/4/2016 1:38:40 PM by SYSTEM  
(modified after loading)  
Analysis Method : C:\CHEM32\2\METHODS\DEF\_LC.M  
Sample Info : Lux 3u Cellulose-1 99.5:0.5 Hex/IPA, 0.5ml/min, 254nm

Additional Info : Peak(s) manually integrated

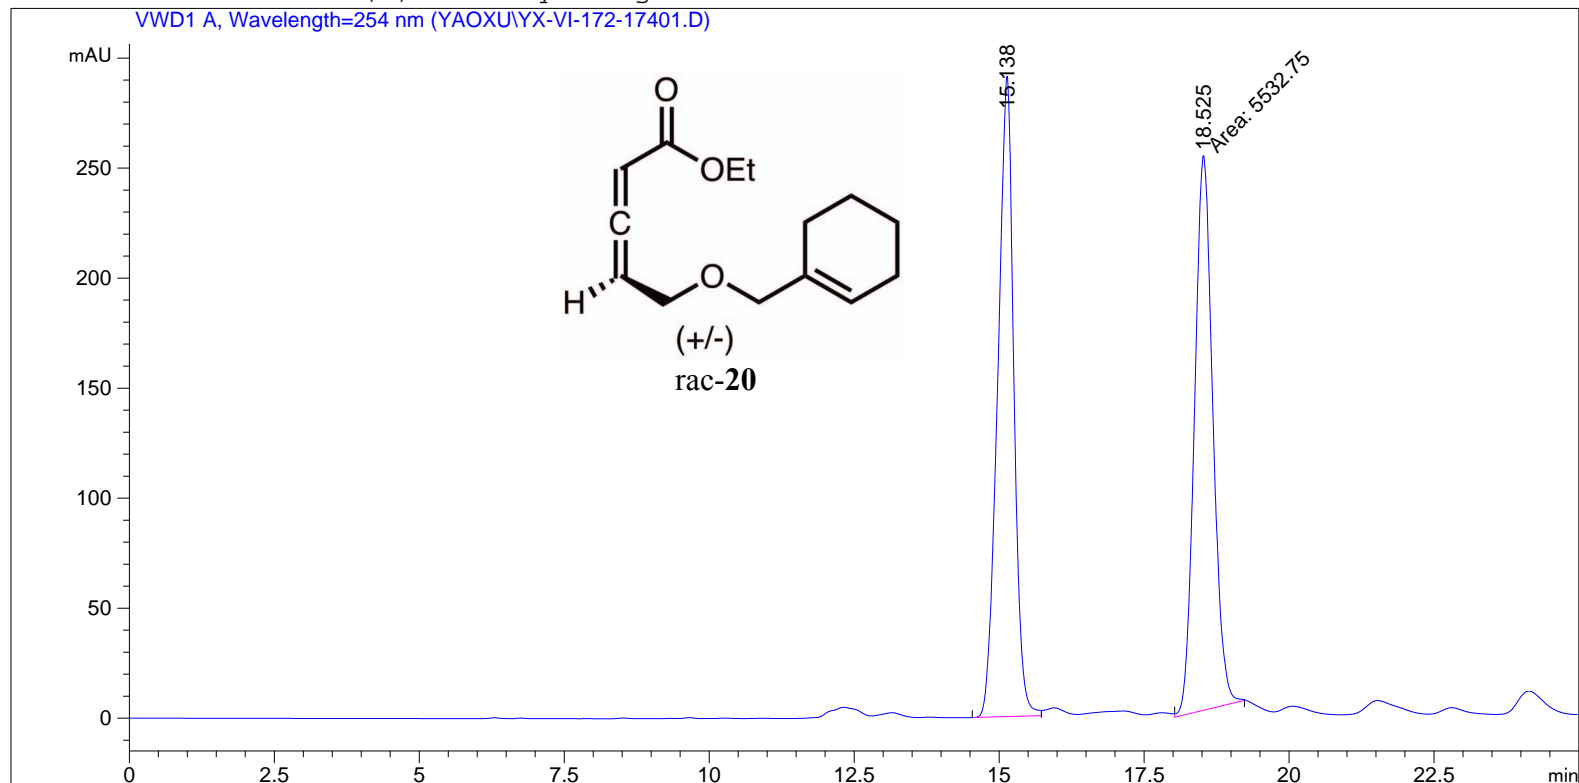

=====  
Area Percent Report  
=====

Sorted By : Signal  
Multiplier: : 1.0000  
Dilution: : 1.0000  
Use Multiplier & Dilution Factor with ISTDs

Signal 1: VWD1 A, Wavelength=254 nm

| Peak # | RetTime [min] | Type | Width [min] | Area [mAU*s] | Height [mAU] | Area %  |
|--------|---------------|------|-------------|--------------|--------------|---------|
| 1      | 15.138        | BV   | 0.2860      | 5614.05078   | 291.08856    | 50.3647 |
| 2      | 18.525        | MM   | 0.3657      | 5532.74805   | 252.16696    | 49.6353 |

Totals : 1.11468e4 543.25552

=====  
\*\*\* End of Report \*\*\*



```

=====
Acq. Operator   : SYSTEM                      Seq. Line :    2
Acq. Instrument : 1220 HPLC                  Location  : Vial 98
Injection Date  : 11/4/2016 1:40:13 PM      Inj       :    1
                                           Inj Volume: 10.000 µl
Acq. Method     : C:\CHEM32\2\METHODS\WY_99.5_0.5_HEX-IPA_0.5ML-MIN_254NM.M
Last changed    : 11/4/2016 1:38:40 PM by SYSTEM
                 (modified after loading)
Analysis Method  : C:\CHEM32\2\METHODS\DEF_LC.M
Last changed    : 2/16/2017 2:45:13 PM by SYSTEM
Sample Info     : Lux 3u Cellulose-1 99.5:0.5 Hex/IPA, 0.5ml/min, 254nm
    
```

Additional Info : Peak(s) manually integrated

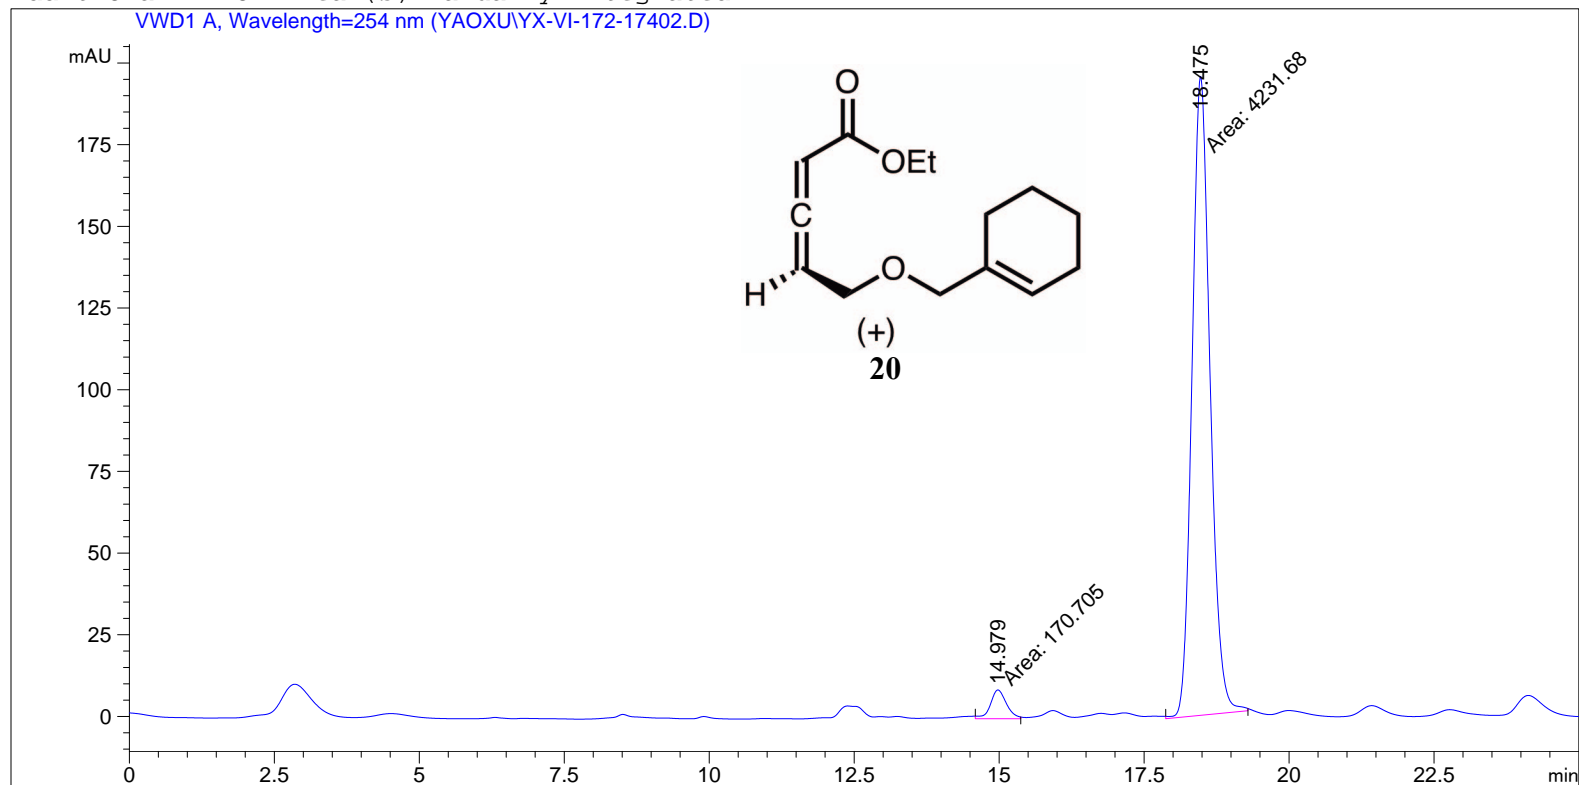

Area Percent Report

```

=====
Sorted By      :      Signal
Multiplier:    :      1.0000
Dilution:      :      1.0000
Use Multiplier & Dilution Factor with ISTDs
    
```

Signal 1: VWD1 A, Wavelength=254 nm

| Peak # | RetTime [min] | Type | Width [min] | Area [mAU*s] | Height [mAU] | Area %  |
|--------|---------------|------|-------------|--------------|--------------|---------|
| 1      | 14.979        | MM   | 0.3225      | 170.70538    | 8.82323      | 3.8776  |
| 2      | 18.475        | MM   | 0.3607      | 4231.67529   | 195.51846    | 96.1224 |

Totals : 4402.38068 204.34169

\*\*\*End of Report \*\*\*

=====
Acq. Operator : SYSTEM
Acq. Instrument : 1220 HPLC
Injection Date : 12/13/2016 1:13:50 PM
Seq. Line : 1
Location : Vial 66
Inj : 1
Inj Volume : 10.000 µl
Acq. Method : C:\CHEM32\2\METHODS\WY\_99.5\_0.5\_HEX-IPA\_0.5ML-MIN\_254NM.M
Last changed : 12/13/2016 1:03:01 PM by SYSTEM
Analysis Method : C:\CHEM32\2\METHODS\DEF\_LC.M
Last changed : 12/6/2016 1:32:42 PM by SYSTEM
Sample Info : Lux 3u Cellulose-1 99.5:0.5 Hex/IPA, 0.5ML/MIN, 254NM
=====

Additional Info : Peak(s) manually integrated

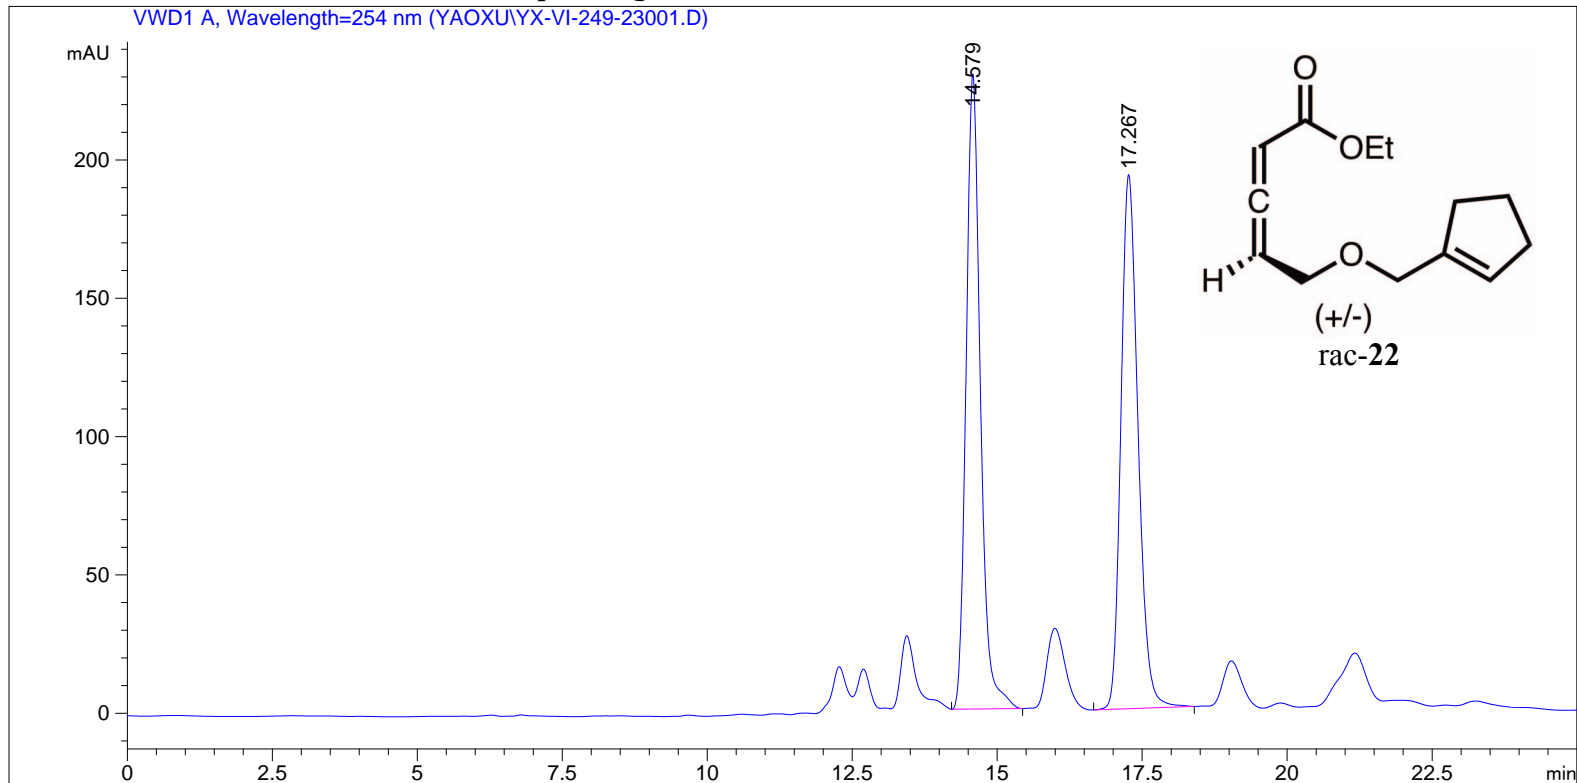

Area Percent Report

Sorted By : Signal
Multiplier: : 1.0000
Dilution: : 1.0000
Use Multiplier & Dilution Factor with ISTDs

Signal 1: VWD1 A, Wavelength=254 nm

Table with 7 columns: Peak #, RetTime [min], Type, Width [min], Area [mAU\*s], Height [mAU], Area %. It lists two peaks at retention times 14.579 and 17.267 minutes.

Totals : 7882.98755 422.54387

\*\*\* End of Report \*\*\*

```
=====
Acq. Operator   : SYSTEM                      Seq. Line :    2
Acq. Instrument : 1220 HPLC                  Location  : Vial 67
Injection Date  : 12/13/2016 1:39:43 PM      Inj       :    1
                                           Inj Volume: 10.000 µl
Acq. Method     : C:\CHEM32\2\METHODS\WY_99.5_0.5_HEX-IPA_0.5ML-MIN_254NM.M
Last changed    : 12/13/2016 1:03:01 PM by SYSTEM
Analysis Method : C:\CHEM32\2\METHODS\DEF_LC.M
Last changed    : 12/6/2016 1:32:42 PM by SYSTEM
Sample Info     : Lux 3u Cellulose-1 99.5:0.5 Hex/IPA, 0.5ML/MIN, 254NM
=====
```

Additional Info : Peak(s) manually integrated

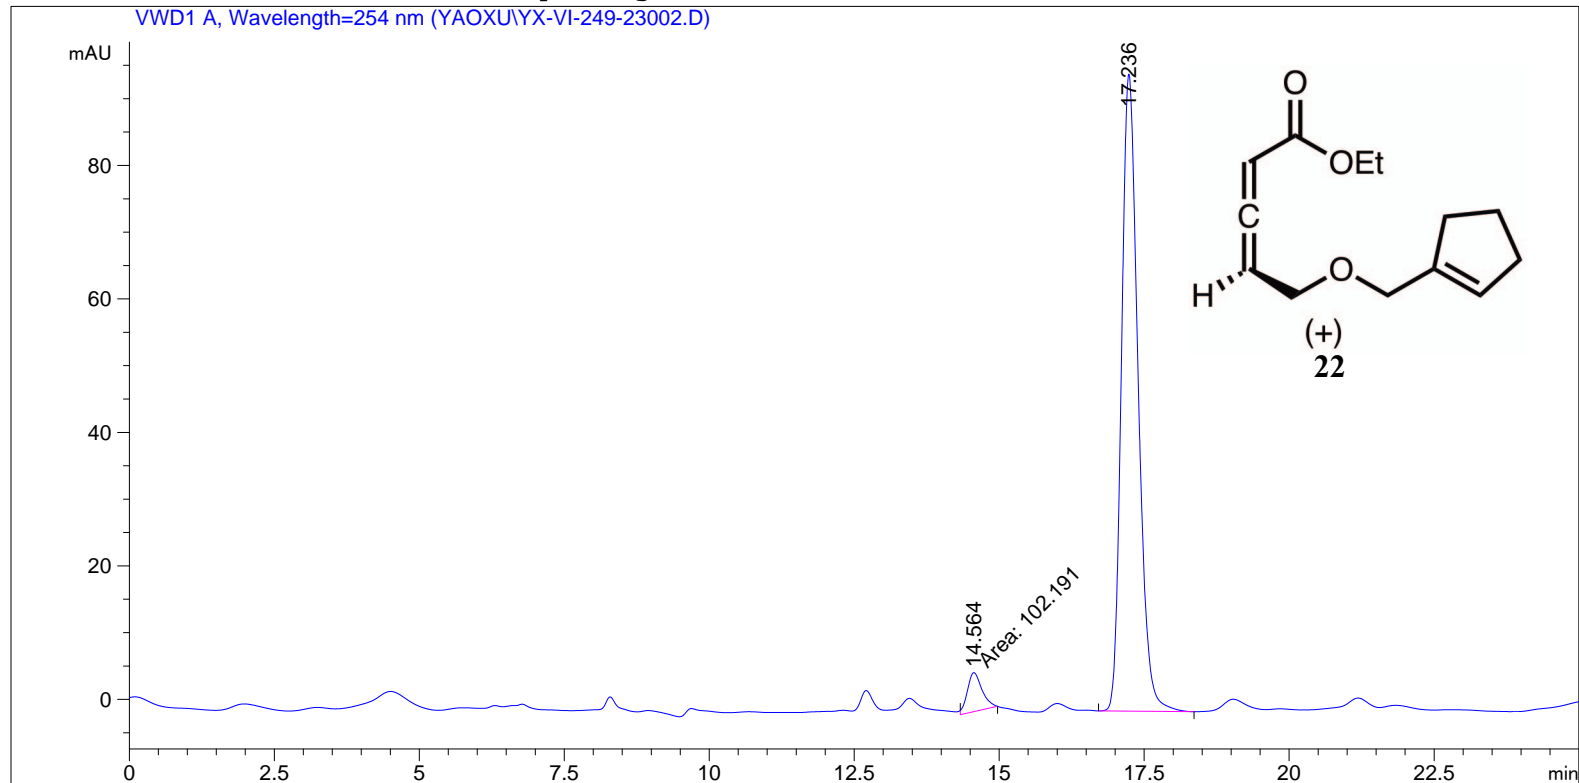

Area Percent Report

```
Sorted By      :      Signal
Multiplier:    :      1.0000
Dilution:      :      1.0000
Use Multiplier & Dilution Factor with ISTDs
```

Signal 1: VWD1 A, Wavelength=254 nm

| Peak # | RetTime [min] | Type | Width [min] | Area [mAU*s] | Height [mAU] | Area %  |
|--------|---------------|------|-------------|--------------|--------------|---------|
| 1      | 14.564        | MM   | 0.2914      | 102.19089    | 5.84469      | 5.1007  |
| 2      | 17.236        | BB   | 0.3074      | 1901.26331   | 95.44495     | 94.8993 |

Totals :                    2003.45419   101.28965

\*\*\* End of Report \*\*\*

Sample Name: YX-VI-213

```

=====
Acq. Operator   : SYSTEM                      Seq. Line :    1
Acq. Instrument : 1220 HPLC                  Location  : Vial 89
Injection Date  : 11/23/2016 5:15:50 PM     Inj       :    1
                                           Inj Volume: 10.000 µl
Acq. Method     : C:\CHEM32\2\METHODS\WY_99.5_0.5_HEX-IPA_0.5ML-MIN_254NM.M
Last changed    : 11/23/2016 3:56:28 PM by SYSTEM
Analysis Method : C:\CHEM32\2\METHODS\DEF_LC.M
Last changed    : 11/14/2016 1:23:16 PM by SYSTEM
Sample Info     : Lux 3u Cellulose-1 99.5:0.5 Hex/IPA, 0.5ml/min, 254nm
=====
    
```

Additional Info : Peak(s) manually integrated

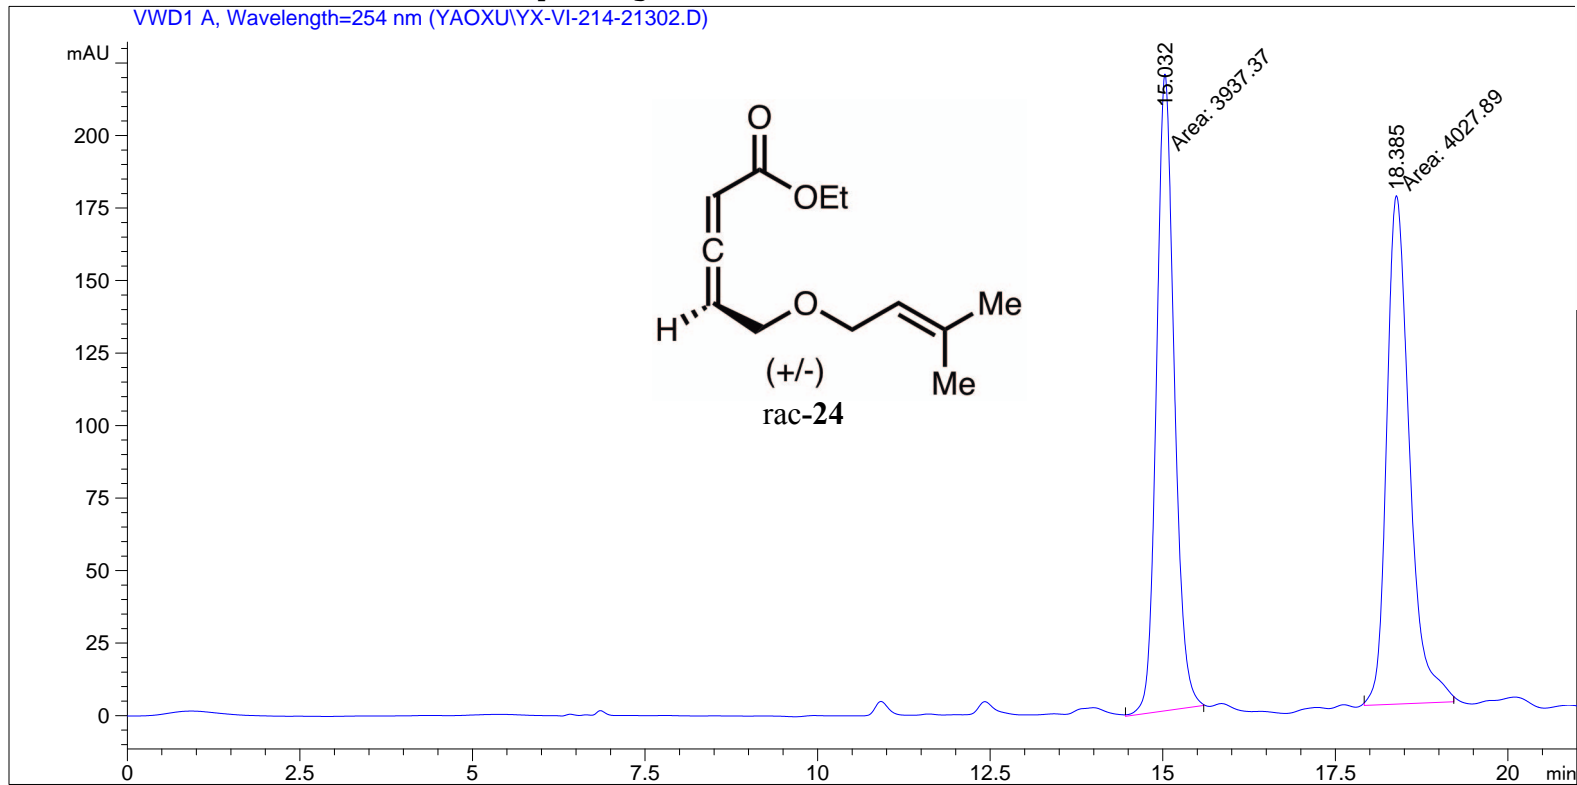

Area Percent Report

```

=====
Sorted By      :      Signal
Multiplier:    :      1.0000
Dilution:      :      1.0000
Use Multiplier & Dilution Factor with ISTDs
    
```

Signal 1: VWD1 A, Wavelength=254 nm

| Peak # | RetTime [min] | Type | Width [min] | Area [mAU*s] | Height [mAU] | Area %  |
|--------|---------------|------|-------------|--------------|--------------|---------|
| 1      | 15.032        | MM   | 0.2989      | 3937.36621   | 219.53625    | 49.4318 |
| 2      | 18.385        | MM   | 0.3829      | 4027.88770   | 175.30659    | 50.5682 |

Totals : 7965.25391 394.84285

\*\*\* End of Report \*\*\*

=====  
Acq. Operator : SYSTEM Seq. Line : 1  
Acq. Instrument : 1220 HPLC Location : Vial 88  
Injection Date : 11/23/2016 4:02:17 PM Inj : 1  
Inj Volume : 10.000 µl  
Acq. Method : C:\CHEM32\2\METHODS\WY\_99.5\_0.5\_HEX-IPA\_0.5ML-MIN\_254NM.M  
Last changed : 11/23/2016 3:56:28 PM by SYSTEM  
Analysis Method : C:\CHEM32\2\METHODS\DEF\_LC.M  
Last changed : 11/14/2016 1:23:16 PM by SYSTEM  
Sample Info : Lux 3u Cellulose-1 99.5:0.5 Hex/IPA, 0.5ml/min, 254nm  
=====

Additional Info : Peak(s) manually integrated  
VWD1 A, Wavelength=254 nm (YAOXU\YX-VI-214-21301.D)

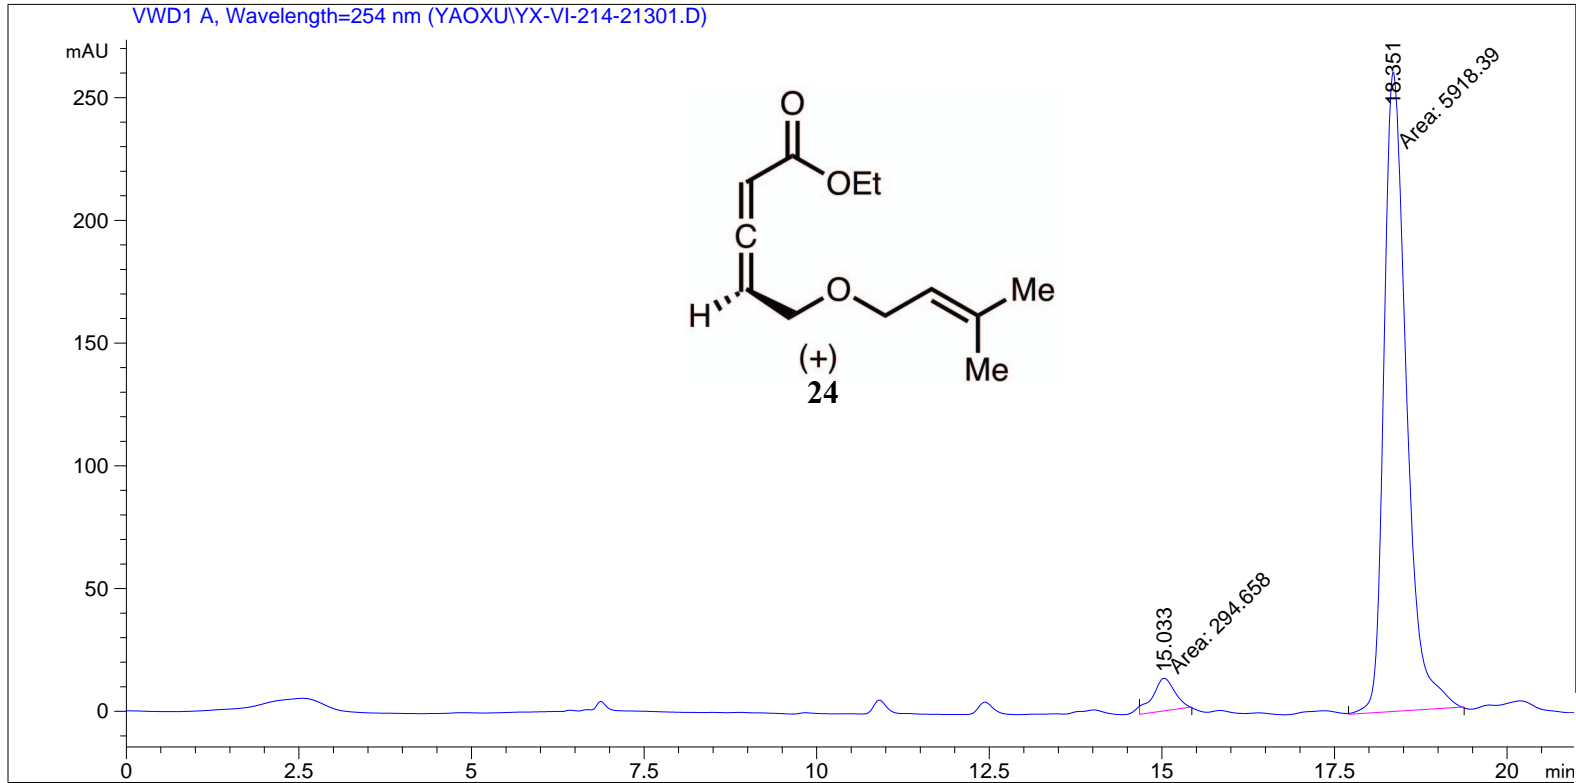

=====  
Area Percent Report  
=====

Sorted By : Signal  
Multiplier: : 1.0000  
Dilution: : 1.0000  
Use Multiplier & Dilution Factor with ISTDs

Signal 1: VWD1 A, Wavelength=254 nm

| Peak # | RetTime [min] | Type | Width [min] | Area [mAU*s] | Height [mAU] | Area %  |
|--------|---------------|------|-------------|--------------|--------------|---------|
| 1      | 15.033        | MM   | 0.3700      | 294.65845    | 13.27302     | 4.7426  |
| 2      | 18.351        | MM   | 0.3787      | 5918.39404   | 260.44778    | 95.2574 |

Totals : 6213.05249 273.72080

=====  
\*\*\* End of Report \*\*\*

=====

|                 |                       |            |             |
|-----------------|-----------------------|------------|-------------|
| Acq. Operator   | : SYSTEM              | Seq. Line  | : 1         |
| Acq. Instrument | : 1220 HPLC           | Location   | : Vial 74   |
| Injection Date  | : 2/9/2017 4:01:59 PM | Inj        | : 1         |
|                 |                       | Inj Volume | : 10.000 µl |

Acq. Method : C:\CHEM32\2\METHODS\MLC-99-1\_HEX-IPA\_0.5ML-MIN.M  
 Last changed : 2/9/2017 3:46:05 PM by SYSTEM  
 Analysis Method : C:\CHEM32\2\METHODS\DEF\_LC.M  
 Last changed : 12/6/2016 1:32:42 PM by SYSTEM  
 Sample Info : Chiralpak IA PG024, 99:1 Hex/IPA, 0.5ml/min, 254nm

Additional Info : Peak(s) manually integrated

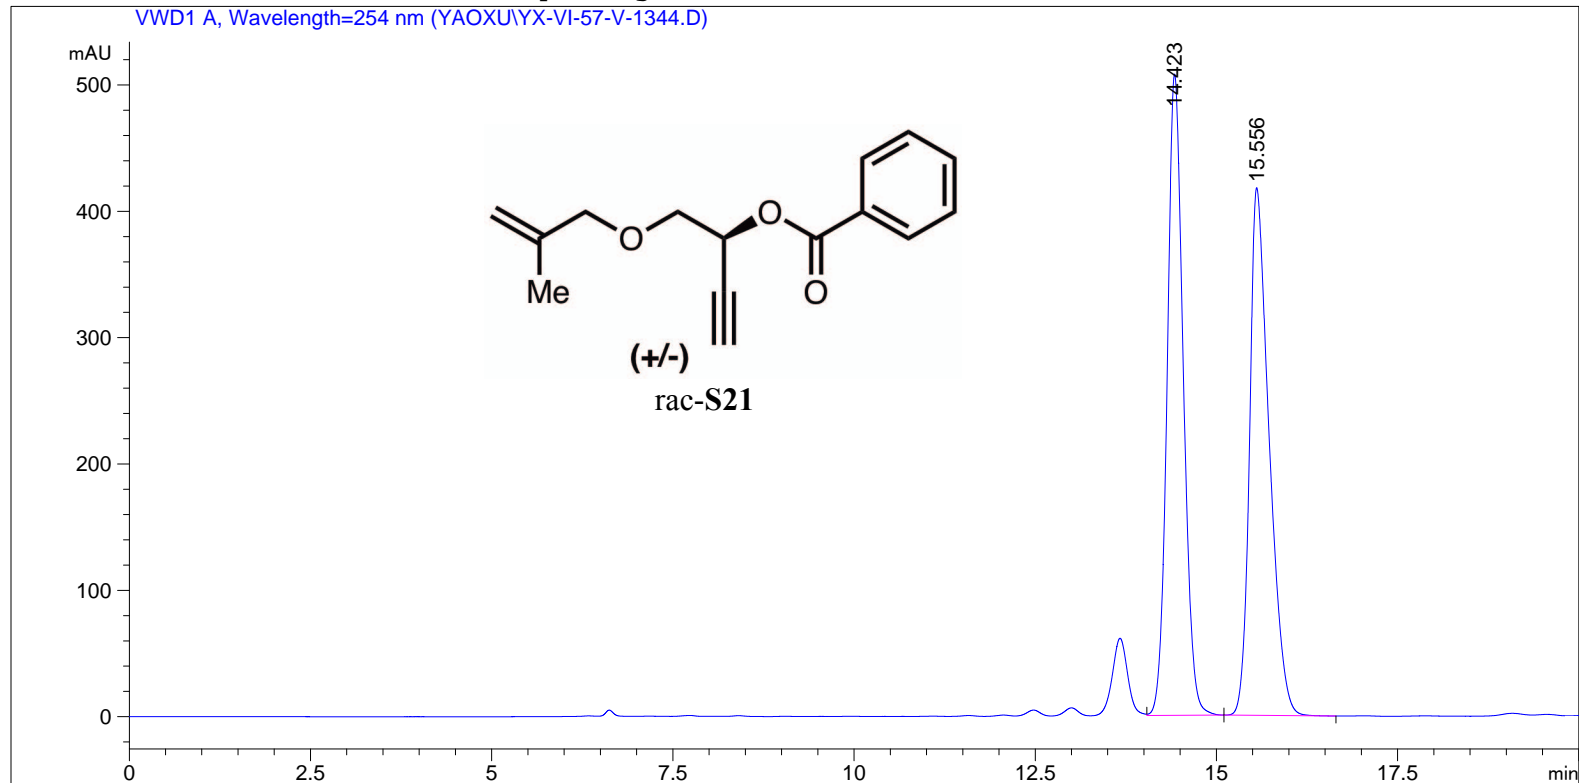

=====  
 Area Percent Report  
 =====

Sorted By : Signal  
 Multiplier: : 1.0000  
 Dilution: : 1.0000  
 Use Multiplier & Dilution Factor with ISTDs

Signal 1: VWD1 A, Wavelength=254 nm

| Peak # | RetTime [min] | Type | Width [min] | Area [mAU*s] | Height [mAU] | Area %  |
|--------|---------------|------|-------------|--------------|--------------|---------|
| 1      | 14.423        | VB   | 0.2343      | 7863.59717   | 507.51968    | 50.0971 |
| 2      | 15.556        | BB   | 0.2773      | 7833.10889   | 417.59097    | 49.9029 |

Totals :                                  1.56967e4    925.11066

=====  
 \*\*\* End of Report \*\*\*

```

=====
Acq. Operator   : SYSTEM                      Seq. Line :    1
Acq. Instrument : 1220 HPLC                  Location  : Vial 73
Injection Date  : 2/9/2017 3:24:22 PM       Inj       :    1
                                           Inj Volume: 10.000 µl

Acq. Method    : C:\CHEM32\2\METHODS\MLC-99-1_HEX-IPA_0.5ML-MIN.M
Last changed   : 2/9/2017 3:39:53 PM by SYSTEM
               : (modified after loading)

Analysis Method : C:\CHEM32\2\METHODS\DEF_LC.M
Last changed   : 12/6/2016 1:32:42 PM by SYSTEM
Sample Info    : Chiralpak IA PG024, 99:1 Hex/IPA, 0.5ml/min, 254nm
=====

```

Additional Info : Peak(s) manually integrated

VWD1 A, Wavelength=254 nm (YAOXU\YX-VI-57-V-1343.D)

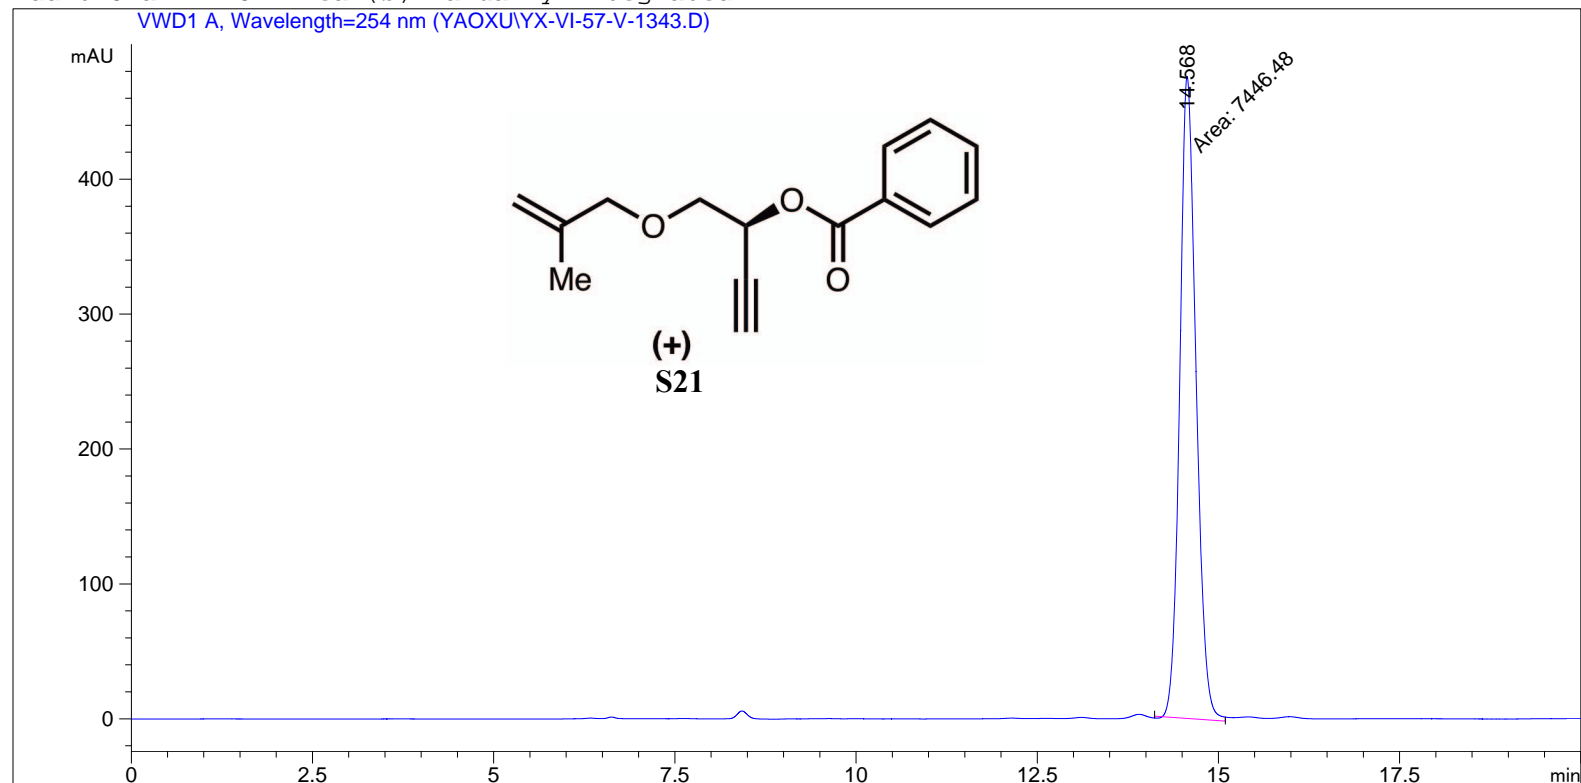

=====  
Area Percent Report  
=====

```

Sorted By          :      Signal
Multiplier:        :      1.0000
Dilution:          :      1.0000
Use Multiplier & Dilution Factor with ISTDs

```

Signal 1: VWD1 A, Wavelength=254 nm

| Peak # | RetTime [min] | Type | Width [min] | Area [mAU*s] | Height [mAU] | Area %   |
|--------|---------------|------|-------------|--------------|--------------|----------|
| 1      | 14.568        | MM   | 0.2608      | 7446.47705   | 475.86578    | 100.0000 |

Totals : 7446.47705 475.86578

=====  
\*\*\* End of Report \*\*\*

=====

|                 |                         |            |             |
|-----------------|-------------------------|------------|-------------|
| Acq. Operator   | : SYSTEM                | Seq. Line  | : 1         |
| Acq. Instrument | : 1220 HPLC             | Location   | : Vial 88   |
| Injection Date  | : 2/23/2017 12:42:45 PM | Inj        | : 1         |
|                 |                         | Inj Volume | : 10.000 µl |

Acq. Method : C:\CHEM32\2\METHODS\YX\_96\_4\_HEX\_IPA\_1ML\_MIN\_254NM.M  
Last changed : 2/22/2017 10:34:51 AM by SYSTEM  
Analysis Method : C:\CHEM32\2\METHODS\DEF\_LC.M  
Last changed : 2/16/2017 2:45:13 PM by SYSTEM  
Sample Info : Lux 3u Cellulose-1 96:4 Hex/IPA, 1ml/min. 254nm

Additional Info : Peak(s) manually integrated

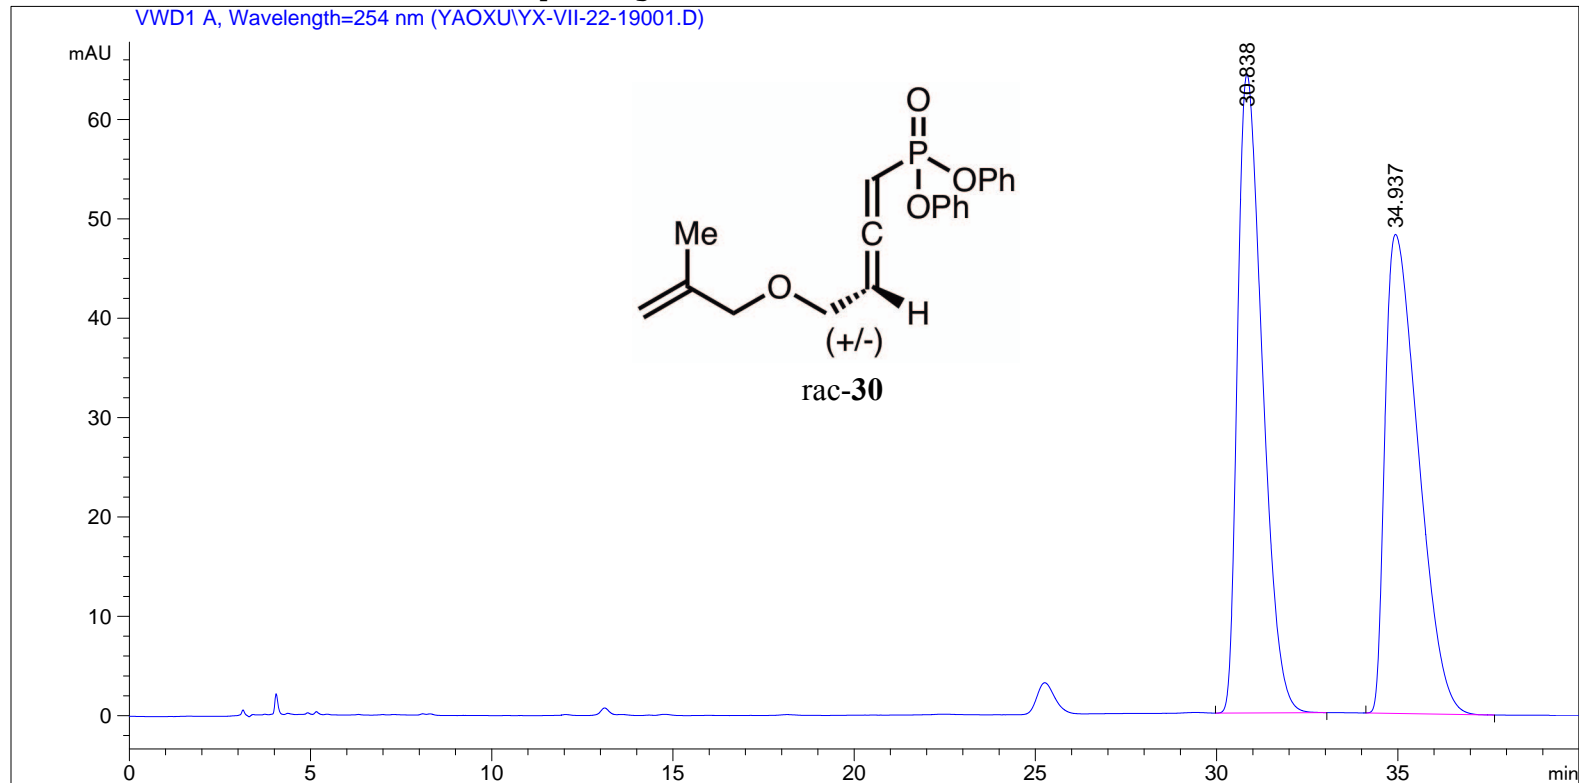

=====  
Area Percent Report  
=====

Sorted By : Signal  
Multiplier: : 1.0000  
Dilution: : 1.0000  
Use Multiplier & Dilution Factor with ISTDs

Signal 1: VWD1 A, Wavelength=254 nm

| Peak # | RetTime [min] | Type | Width [min] | Area [mAU*s] | Height [mAU] | Area %  |
|--------|---------------|------|-------------|--------------|--------------|---------|
| 1      | 30.838        | BB   | 0.7448      | 3062.81128   | 64.29079     | 49.9482 |
| 2      | 34.937        | BB   | 0.9647      | 3069.15894   | 48.21045     | 50.0518 |

Totals : 6131.97021 112.50123

=====  
\*\*\* End of Report \*\*\*



```

=====
Acq. Operator   : SYSTEM                               Seq. Line :    2
Acq. Instrument : 1220 HPLC                             Location  : Vial 89
Injection Date  : 2/23/2017 1:23:41 PM                 Inj       :    1
                                                    Inj Volume: 10.000 µl

Acq. Method    : C:\CHEM32\2\METHODS\YX_96_4_HEX_IPA_1ML_MIN_254NM.M
Last changed   : 2/22/2017 10:34:51 AM by SYSTEM
Analysis Method: C:\CHEM32\2\METHODS\DEF_LC.M
Last changed   : 2/16/2017 2:45:13 PM by SYSTEM
Sample Info    : Lux 3u Cellulose-1 96:4 Hex/IPA, 1ml/min. 254nm
=====
  
```

Additional Info : Peak(s) manually integrated

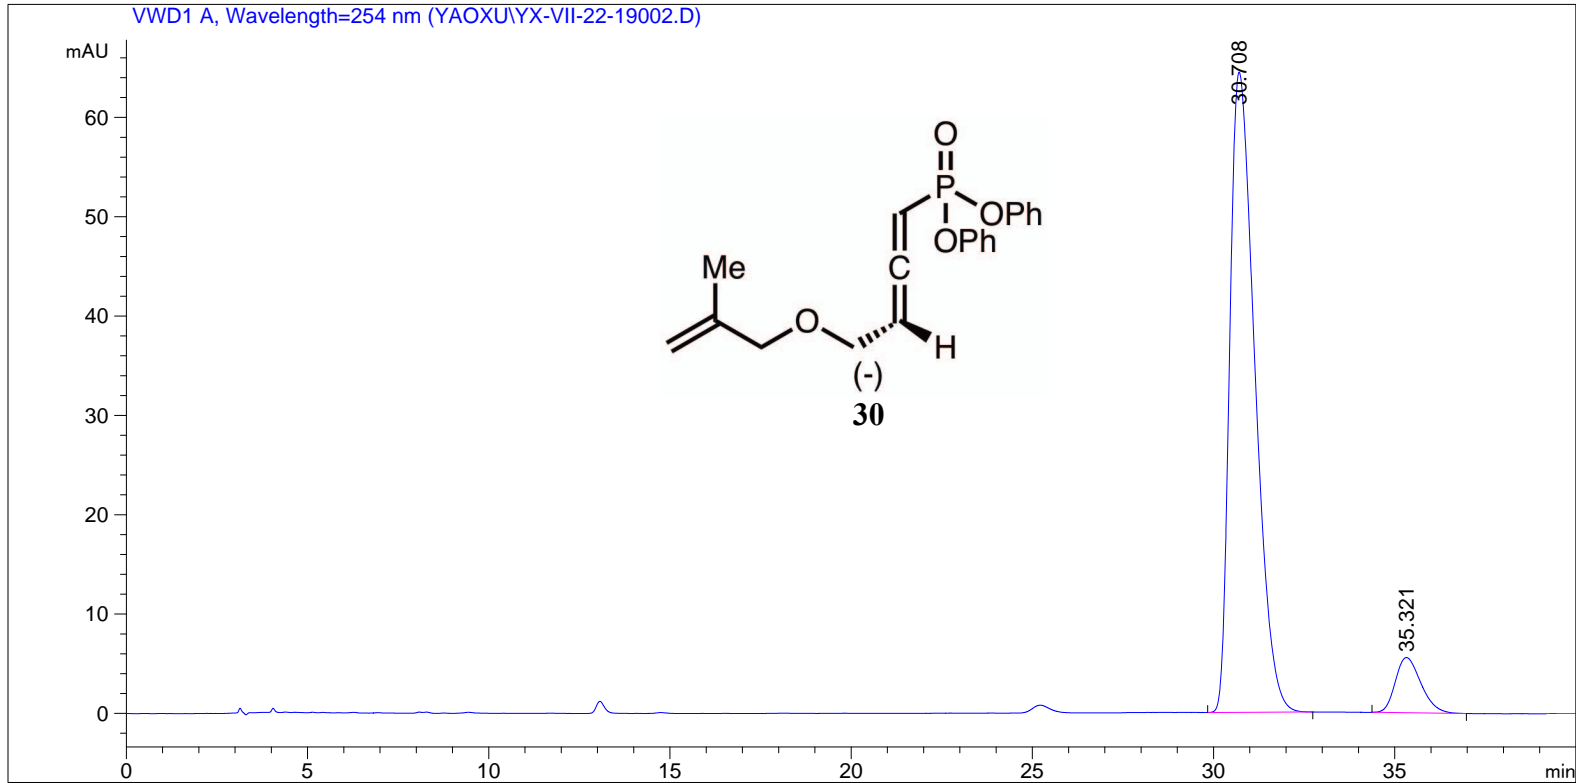

Area Percent Report

```

Sorted By           :      Signal
Multiplier          :      1.0000
Dilution            :      1.0000
Use Multiplier & Dilution Factor with ISTDs
  
```

Signal 1: VWD1 A, Wavelength=254 nm

| Peak # | RetTime [min] | Type | Width [min] | Area [mAU*s] | Height [mAU] | Area %  |
|--------|---------------|------|-------------|--------------|--------------|---------|
| 1      | 30.708        | BB   | 0.7513      | 3095.48901   | 64.45647     | 91.9020 |
| 2      | 35.321        | BB   | 0.7456      | 272.76184    | 5.55795      | 8.0980  |

Totals :                      3368.25085    70.01442

\*\*\* End of Report \*\*\*

```
=====
Acq. Operator   : SYSTEM                      Seq. Line :    1
Acq. Instrument : 1220 HPLC                  Location  : Vial 65
Injection Date  : 1/7/2017 12:20:26 PM      Inj       :    1
                                           Inj Volume: 10.000 µl

Acq. Method    : C:\CHEM32\2\METHODS\MLC-99-1_HEX-IPA_0.5ML-MIN.M
Last changed   : 1/7/2017 12:58:00 PM by SYSTEM
               (modified after loading)

Analysis Method : C:\CHEM32\2\METHODS\DEF_LC.M
Last changed   : 12/6/2016 1:32:42 PM by SYSTEM
Sample Info    : Chiralpak IA PG024, 99:1 Hex/IPA, 0.5ML/MIN, 254nm
=====
```

Additional Info : Peak(s) manually integrated

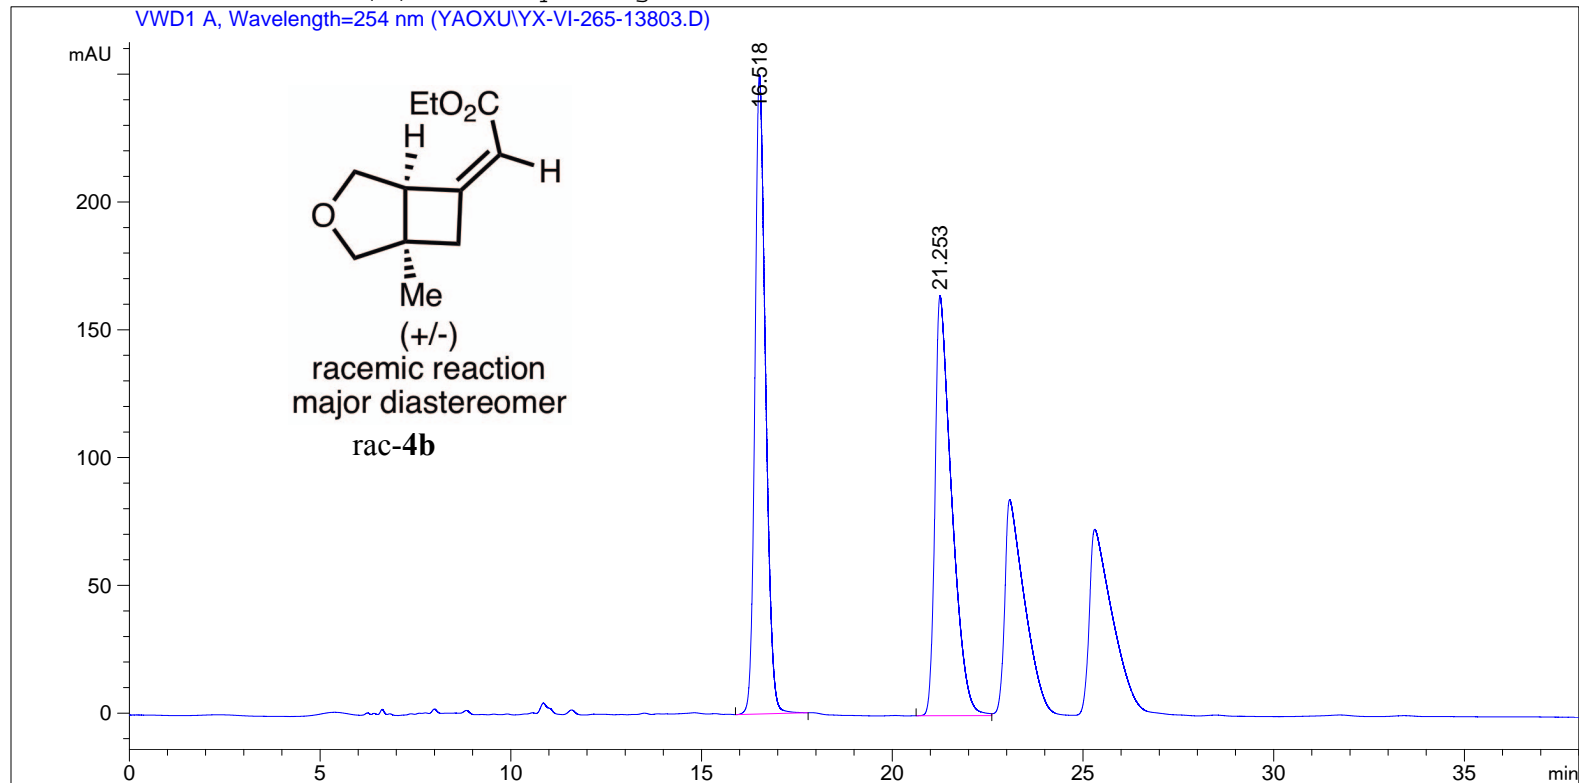

=====  
 Area Percent Report  
 =====

Sorted By : Signal  
 Multiplier: : 1.0000  
 Dilution: : 1.0000  
 Use Multiplier & Dilution Factor with ISTDs

Signal 1: VWD1 A, Wavelength=254 nm

| Peak # | RetTime [min] | Type | Width [min] | Area [mAU*s] | Height [mAU] | Area %  |
|--------|---------------|------|-------------|--------------|--------------|---------|
| 1      | 16.518        | BB   | 0.2899      | 4866.85303   | 250.21080    | 49.3599 |
| 2      | 21.253        | BV   | 0.4146      | 4993.07715   | 164.29343    | 50.6401 |

Totals : 9859.93018 414.50423

=====  
 \*\*\*End of Report \*\*\*

```
=====
Acq. Operator   : SYSTEM                      Seq. Line :    2
Acq. Instrument : 1220 HPLC                  Location  : Vial 66
Injection Date  : 1/7/2017 12:59:18 PM      Inj       :    1
                                                Inj Volume: 10.000 µl

Acq. Method    : C:\CHEM32\2\METHODS\MLC-99-1_HEX-IPA_0.5ML-MIN.M
Last changed   : 1/7/2017 1:33:07 PM by SYSTEM
                (modified after loading)

Analysis Method: C:\CHEM32\2\METHODS\DEF_LC.M
Last changed   : 12/6/2016 1:32:42 PM by SYSTEM
Sample Info    : Chiralpak IA PG024, 99:1 Hex/IPA, 0.5ML/MIN, 254nm
=====
```

Additional Info : Peak(s) manually integrated

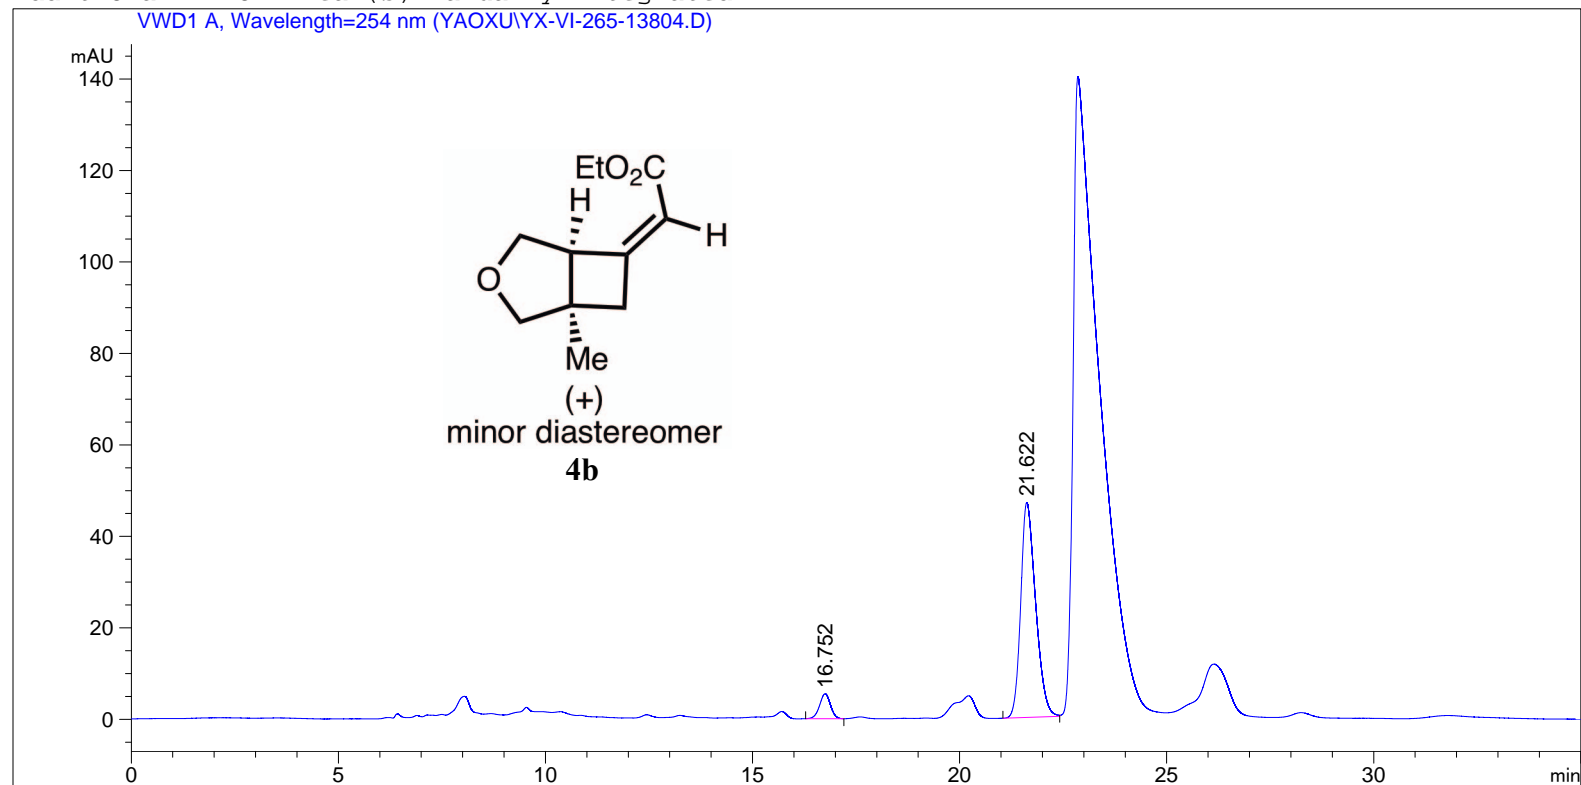

=====  
Area Percent Report  
=====

```
Sorted By      :      Signal
Multiplier:    :      1.0000
Dilution:      :      1.0000
Use Multiplier & Dilution Factor with ISTDs
```

Signal 1: VWD1 A, Wavelength=254 nm

| Peak # | RetTime [min] | Type | Width [min] | Area [mAU*s] | Height [mAU] | Area %  |
|--------|---------------|------|-------------|--------------|--------------|---------|
| 1      | 16.752        | BB   | 0.2149      | 99.53814     | 5.46616      | 7.8069  |
| 2      | 21.622        | BV   | 0.3442      | 1175.46240   | 47.00769     | 92.1931 |

Totals :                   1275.00054   52.47386

=====  
\*\*\*End of Report \*\*\*

```

=====
Acq. Operator   : SYSTEM                   Seq. Line :    1
Acq. Instrument : 1220 HPLC                 Location  : Vial 65
Injection Date  : 1/7/2017 12:20:26 PM    Inj       :    1
                                           Inj Volume: 10.000 µl
Acq. Method    : C:\CHEM32\2\METHODS\MLC-99-1_HEX-IPA_0.5ML-MIN.M
Last changed   : 1/7/2017 12:58:00 PM by SYSTEM
                (modified after loading)
Analysis Method: C:\CHEM32\2\METHODS\DEF_LC.M
Last changed   : 12/6/2016 1:32:42 PM by SYSTEM
Sample Info    : Chiralpak IA PG024, 99:1 Hex/IPA, 0.5ML/MIN, 254nm
=====

```

Additional Info : Peak(s) manually integrated  
VWD1 A, Wavelength=254 nm (YAOXU\YX-VI-265-13803.D)

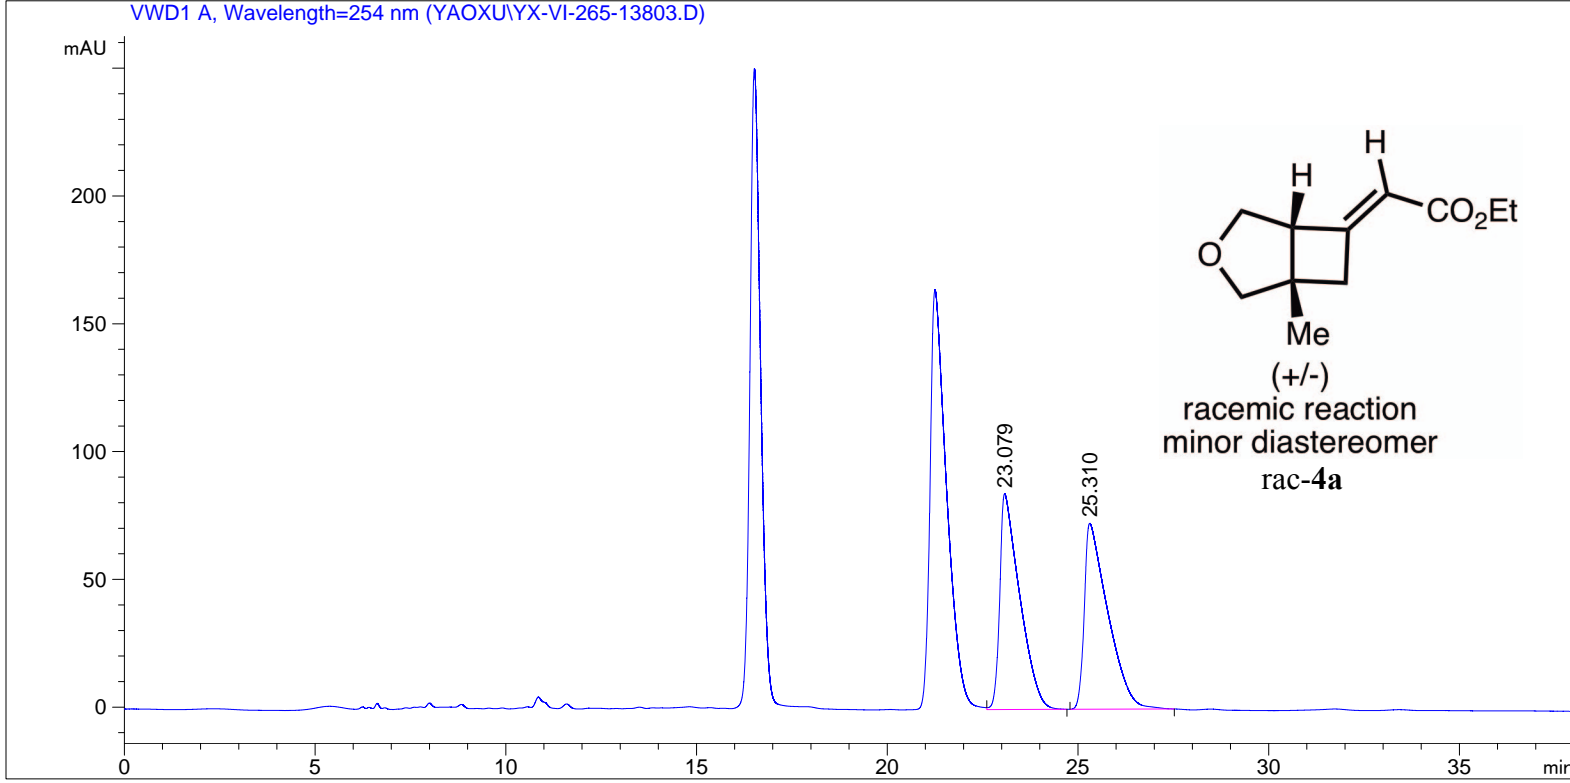

=====  
Area Percent Report  
=====

```

Sorted By           :      Signal
Multiplier:         :      1.0000
Dilution:           :      1.0000
Use Multiplier & Dilution Factor with ISTDs

```

Signal 1: VWD1 A, Wavelength=254 nm

| Peak # | RetTime [min] | Type | Width [min] | Area [mAU*s] | Height [mAU] | Area %  |
|--------|---------------|------|-------------|--------------|--------------|---------|
| 1      | 23.079        | VB   | 0.4775      | 3074.14111   | 84.38940     | 49.6702 |
| 2      | 25.310        | BB   | 0.5500      | 3114.96582   | 72.75870     | 50.3298 |

Totals :                          6189.10693    157.14809

=====  
\*\*\* End of Report \*\*\*

```

=====
Acq. Operator   : SYSTEM                      Seq. Line :    2
Acq. Instrument : 1220 HPLC                   Location  : Vial 66
Injection Date  : 1/7/2017 12:59:18 PM       Inj       :    1
                                           Inj Volume: 10.000 µl

Acq. Method     : C:\CHEM32\2\METHODS\MLC-99-1_HEX-IPA_0.5ML-MIN.M
Last changed    : 1/7/2017 1:33:07 PM by SYSTEM
                  (modified after loading)

Analysis Method : C:\CHEM32\2\METHODS\DEF_LC.M
Last changed    : 12/6/2016 1:32:42 PM by SYSTEM
Sample Info     : Chiralpak IA PG024, 99:1 Hex/IPA, 0.5ML/MIN, 254nm
=====

```

Additional Info : Peak(s) manually integrated

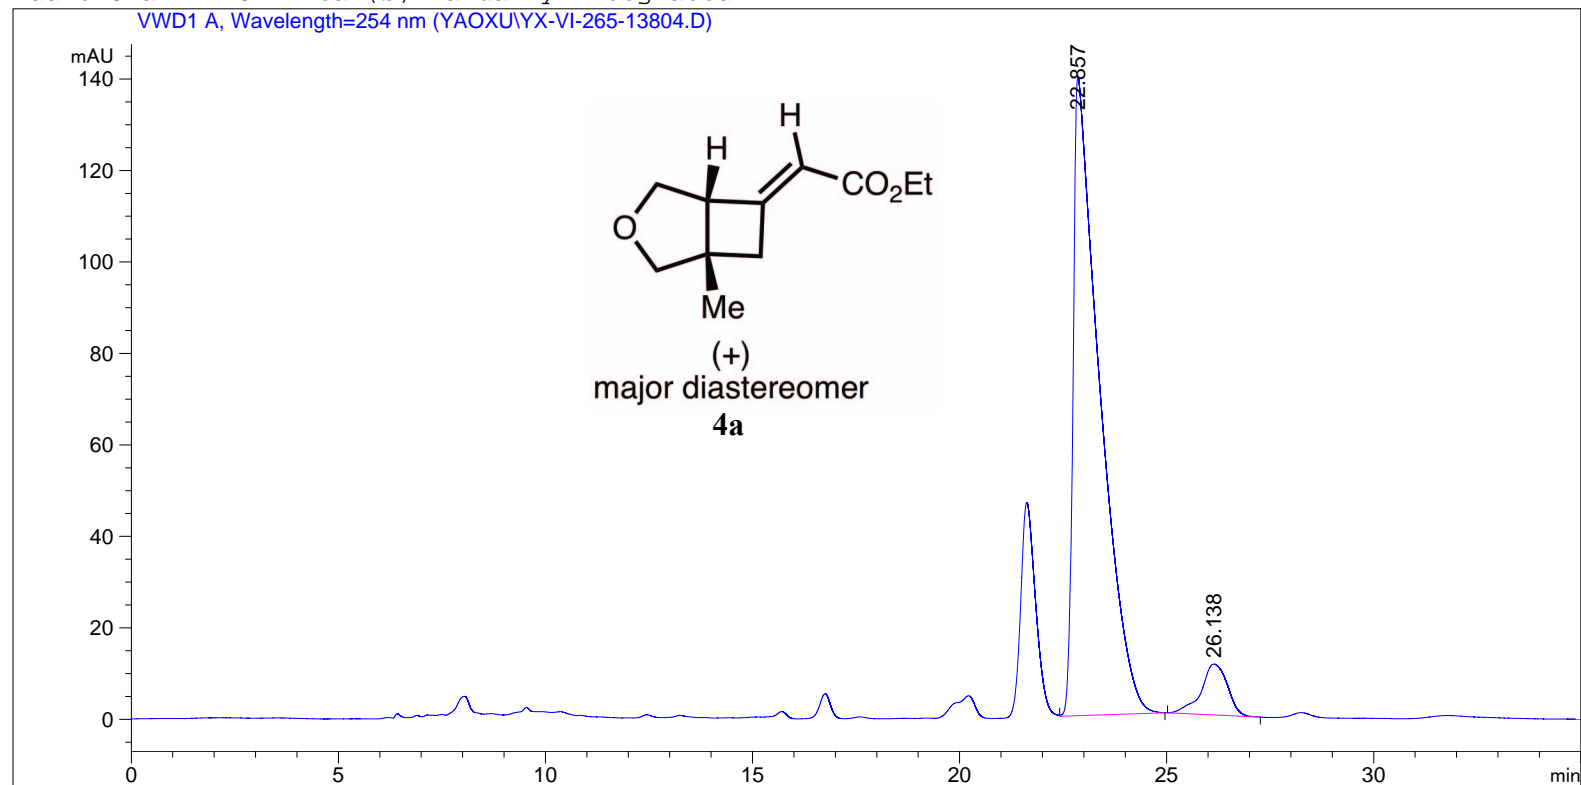

```

=====
Area Percent Report
=====

```

```

Sorted By      :      Signal
Multiplier:    :      1.0000
Dilution:      :      1.0000
Use Multiplier & Dilution Factor with ISTDs

```

Signal 1: VWD1 A, Wavelength=254 nm

| Peak # | RetTime [min] | Type | Width [min] | Area [mAU*s] | Height [mAU] | Area %  |
|--------|---------------|------|-------------|--------------|--------------|---------|
| 1      | 22.857        | VB   | 0.5633      | 6208.78564   | 139.76122    | 92.6354 |
| 2      | 26.138        | BB   | 0.5221      | 493.60278    | 11.12510     | 7.3646  |

```
Totals :                      6702.38843  150.88631
```

```

=====
*** End of Report ***

```

```

=====
Acq. Operator   : SYSTEM                      Seq. Line :    1
Acq. Instrument : 1220 HPLC                   Location  : Vial 97
Injection Date  : 2/6/2017 9:41:06 PM        Inj       :    1
                                                Inj Volume: 10.000 µl

Acq. Method     : C:\CHEM32\2\METHODS\YX_97_3_HEX_IPA_1MIN_254NM.M
Last changed    : 2/4/2017 8:59:05 PM by SYSTEM
Analysis Method : C:\CHEM32\2\METHODS\DEF_LC.M
Last changed    : 12/6/2016 1:32:42 PM by SYSTEM
Sample Info     : Lux 3u Cellulose-1 97:3 Hex/IPA, 1ml/min, 254nm
    
```

Additional Info : Peak(s) manually integrated

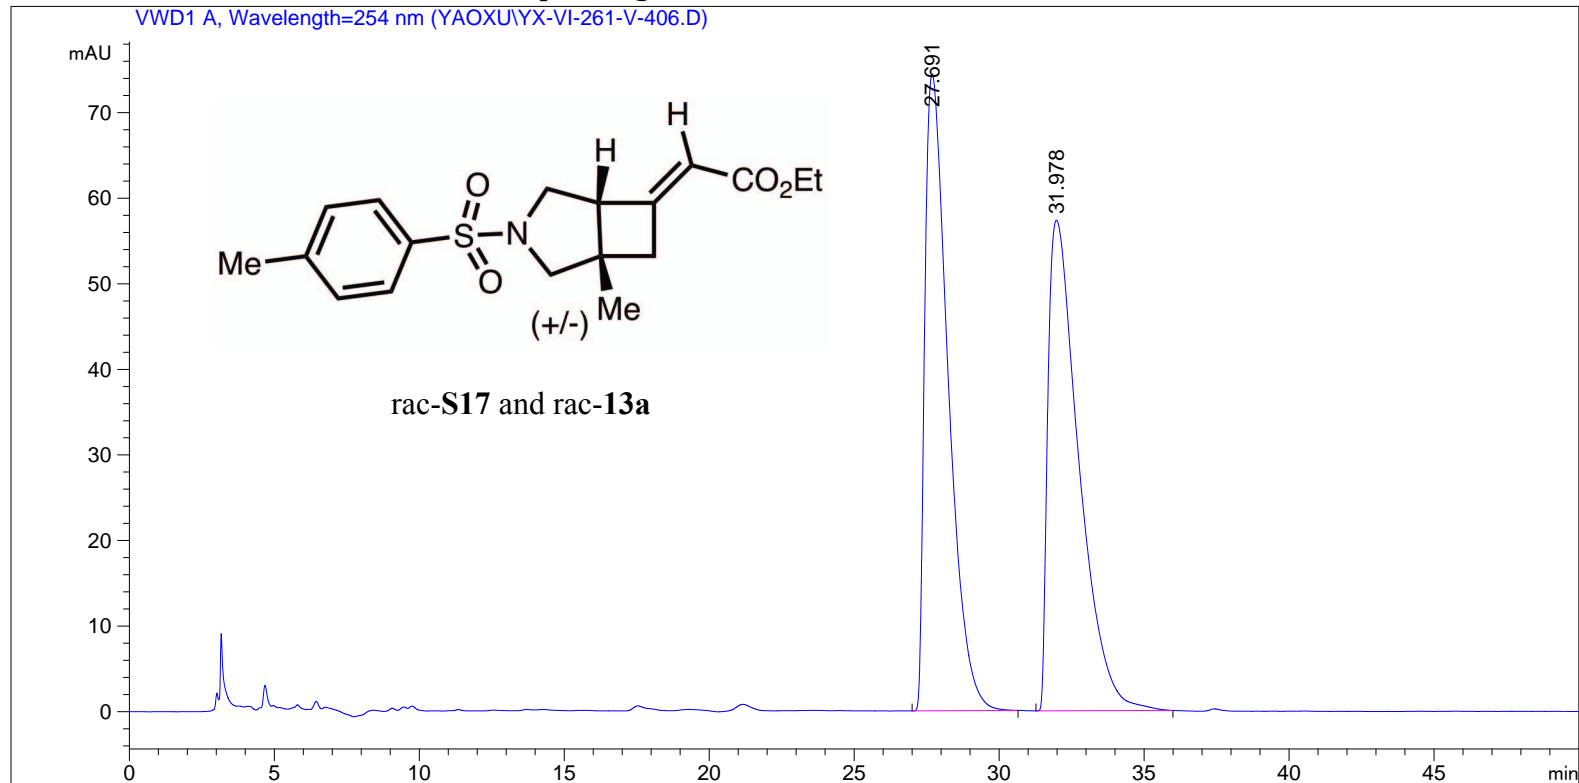

Area Percent Report

```

Sorted By          :      Signal
Multiplier:        :      1.0000
Dilution:          :      1.0000
Use Multiplier & Dilution Factor with ISTDs
    
```

Signal 1: VWD1 A, Wavelength=254 nm

| Peak # | RetTime [min] | Type | Width [min] | Area [mAU*s] | Height [mAU] | Area %  |
|--------|---------------|------|-------------|--------------|--------------|---------|
| 1      | 27.691        | BB   | 0.8670      | 4182.81641   | 74.39319     | 49.6290 |
| 2      | 31.978        | BB   | 1.0942      | 4245.35742   | 57.31539     | 50.3710 |

Totals : 8428.17383 131.70858

\*\*\* End of Report \*\*\*

```

=====
Acq. Operator   : SYSTEM                      Seq. Line :    2
Acq. Instrument : 1220 HPLC                  Location  : Vial 100
Injection Date  : 2/6/2017 10:32:01 PM      Inj       :    1
                                           Inj Volume: 10.000 µl

Acq. Method     : C:\CHEM32\2\METHODS\YX_97_3_HEX_IPA_1MIN_254NM.M
Last changed    : 2/4/2017 8:59:05 PM by SYSTEM
Analysis Method : C:\CHEM32\2\METHODS\DEF_LC.M
Last changed    : 12/6/2016 1:32:42 PM by SYSTEM
Sample Info     : Lux 3u Cellulose-1 97:3 Hex/IPA, 1ml/min, 254nm
    
```

Additional Info : Peak(s) manually integrated

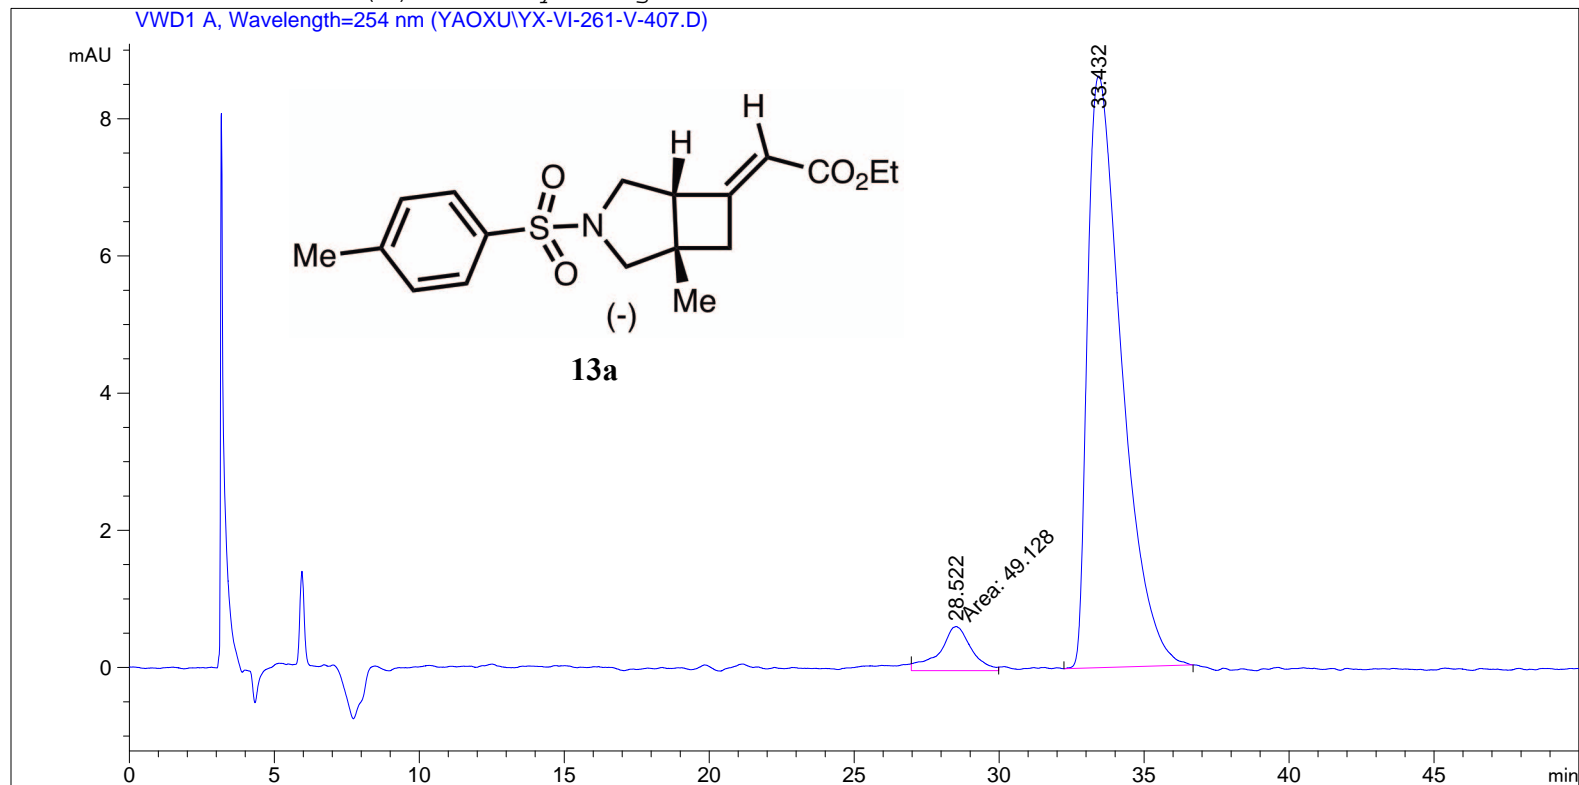

Area Percent Report

```

Sorted By      :      Signal
Multiplier:    :      1.0000
Dilution:      :      1.0000
Use Multiplier & Dilution Factor with ISTDs
    
```

Signal 1: VWD1 A, Wavelength=254 nm

| Peak # | RetTime [min] | Type | Width [min] | Area [mAU*s] | Height [mAU] | Area %  |
|--------|---------------|------|-------------|--------------|--------------|---------|
| 1      | 28.522        | MM   | 1.2727      | 49.12797     | 6.43336e-1   | 6.4967  |
| 2      | 33.432        | BB   | 1.1574      | 707.07648    | 8.62494      | 93.5033 |

Totals : 756.20445 9.26827

\*\*\* End of Report \*\*\*

```

=====
Acq. Operator   : SYSTEM                      Seq. Line : 2
Acq. Instrument : 1220 HPLC                   Location  : Vial 87
Injection Date  : 3/3/2017 12:17:59 PM       Inj       : 1
                                                Inj Volume: 10.000 µl

Acq. Method     : C:\CHEM32\2\METHODS\YX_97_3_HEX_IPA_1MIN_254NM.M
Last changed    : 3/3/2017 11:16:13 AM by SYSTEM
Analysis Method : C:\CHEM32\2\METHODS\DEF_LC.M
Last changed    : 2/16/2017 2:45:13 PM by SYSTEM
Sample Info     : Lux 3u Cellulose-1 97:3 Hex/IPA, 1ml/min, 254nm
=====
  
```

Additional Info : Peak(s) manually integrated

VWD1 A, Wavelength=254 nm (YAOXU\YX-VII-28-V-402.D)

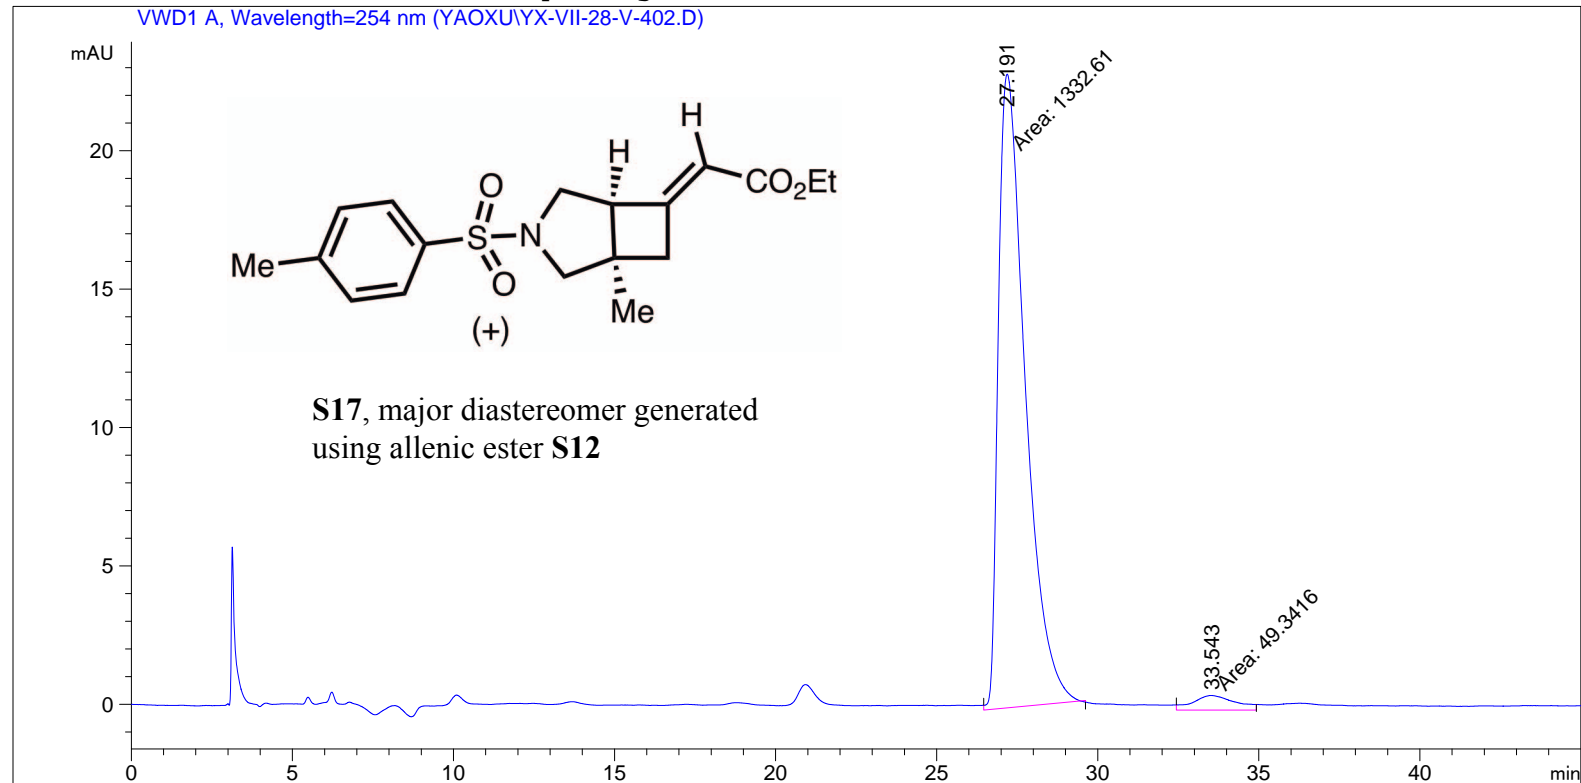

```

=====
                          Area Percent Report
=====
  
```

```

Sorted By      :      Signal
Multiplier:    :      1.0000
Dilution:      :      1.0000
Use Multiplier & Dilution Factor with ISTDs
  
```

Signal 1: VWD1 A, Wavelength=254 nm

| Peak # | RetTime [min] | Type | Width [min] | Area [mAU*s] | Height [mAU] | Area %  |
|--------|---------------|------|-------------|--------------|--------------|---------|
| 1      | 27.191        | MM   | 0.9700      | 1332.60522   | 22.89806     | 96.4296 |
| 2      | 33.543        | MM   | 1.5507      | 49.34163     | 5.30315e-1   | 3.5704  |

Totals : 1381.94686 23.42838

\*\*\* End of Report \*\*\*



Acq. Operator : SYSTEM Seq. Line : 4
Acq. Instrument : 1220 HPLC Location : Vial 96
Injection Date : 3/3/2017 1:49:42 PM Inj : 1
Inj Volume : 10.000 µl
Acq. Method : C:\CHEM32\2\METHODS\YX\_97\_3\_HEX\_IPA\_1MIN\_254NM.M
Last changed : 3/3/2017 11:16:13 AM by SYSTEM
Analysis Method : C:\CHEM32\2\METHODS\DEF\_LC.M
Last changed : 2/16/2017 2:45:13 PM by SYSTEM
Sample Info : Lux 3u Cellulose-1 97:3 Hex/IPA, 1ml/min, 254nm

Additional Info : Peak(s) manually integrated

VWD1 A, Wavelength=254 nm (YAOXU\YX-VII-28-V-404.D)

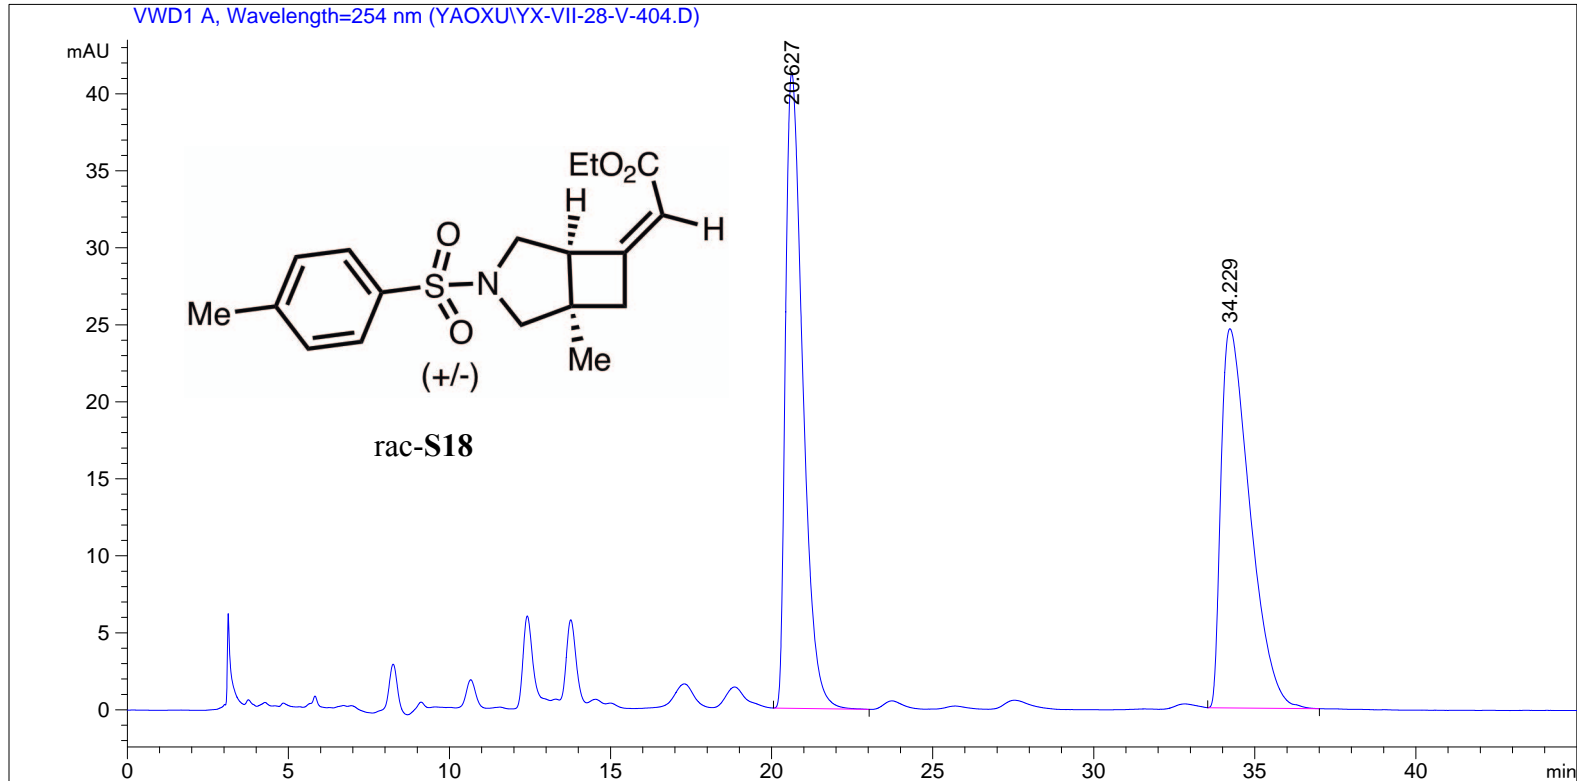

Area Percent Report

Sorted By : Signal
Multiplier: : 1.0000
Dilution: : 1.0000
Use Multiplier & Dilution Factor with ISTDs

Signal 1: VWD1 A, Wavelength=254 nm

Table with 7 columns: Peak #, RetTime [min], Type, Width [min], Area [mAU\*s], Height [mAU], Area %. Contains two rows of peak data.

Totals : 3070.49072 65.93360

\*\*\* End of Report \*\*\*

=====

|                 |                        |            |             |
|-----------------|------------------------|------------|-------------|
| Acq. Operator   | : SYSTEM               | Seq. Line  | : 1         |
| Acq. Instrument | : 1220 HPLC            | Location   | : Vial 100  |
| Injection Date  | : 3/3/2017 11:32:06 AM | Inj        | : 1         |
|                 |                        | Inj Volume | : 10.000 µl |

Acq. Method : C:\CHEM32\2\METHODS\YX\_97\_3\_HEX\_IPA\_1MIN\_254NM.M  
Last changed : 3/3/2017 11:16:13 AM by SYSTEM  
Analysis Method : C:\CHEM32\2\METHODS\DEF\_LC.M  
Last changed : 2/16/2017 2:45:13 PM by SYSTEM  
Sample Info : Lux 3u Cellulose-1 97:3 Hex/IPA, 1ml/min, 254nm

Additional Info : Peak(s) manually integrated

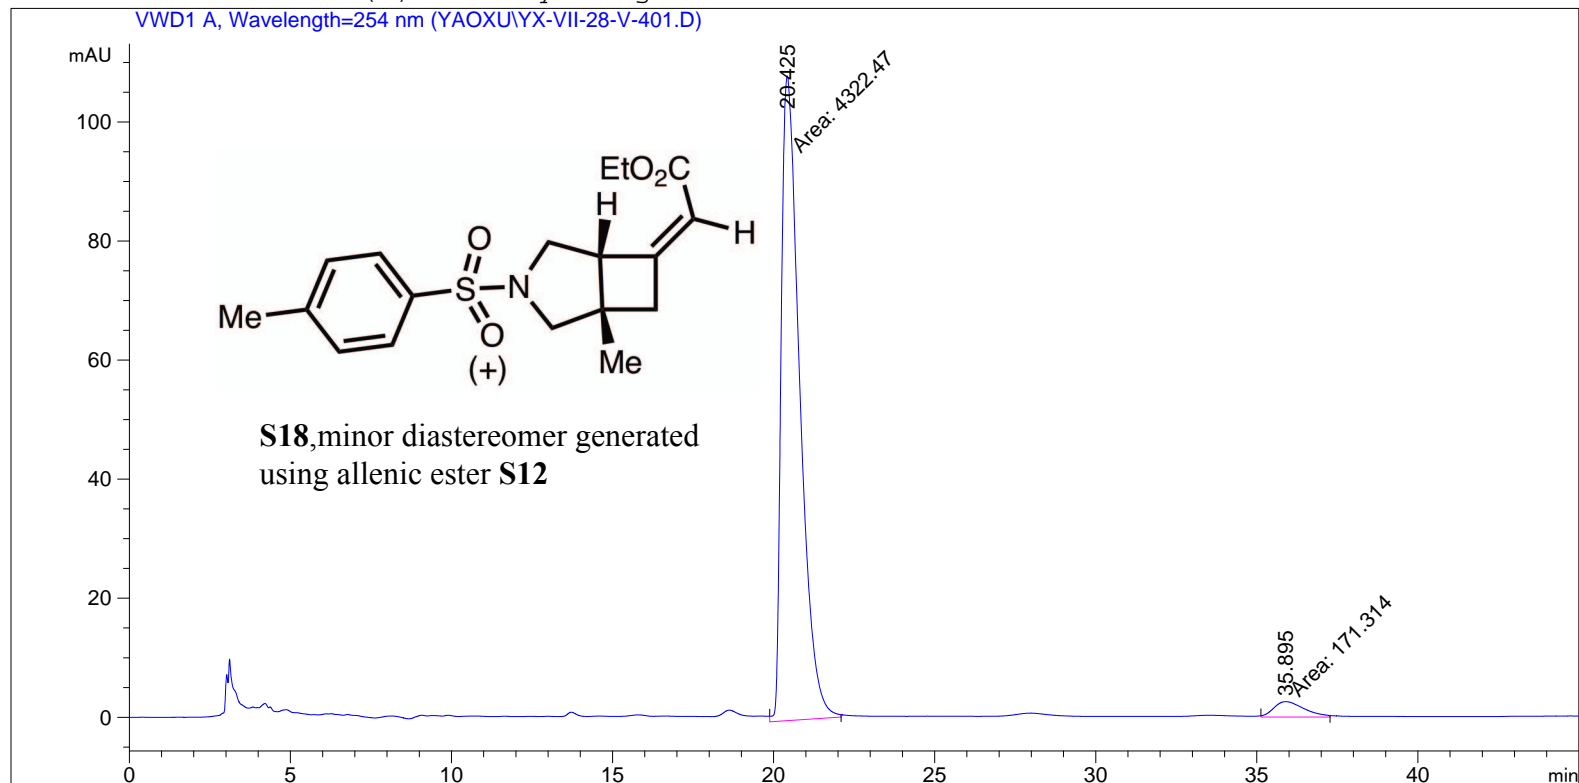

=====  
Area Percent Report  
=====

Sorted By : Signal  
Multiplier: : 1.0000  
Dilution: : 1.0000  
Use Multiplier & Dilution Factor with ISTDs

Signal 1: VWD1 A, Wavelength=254 nm

| Peak # | RetTime [min] | Type | Width [min] | Area [mAU*s] | Height [mAU] | Area %  |
|--------|---------------|------|-------------|--------------|--------------|---------|
| 1      | 20.425        | MM   | 0.6654      | 4322.46924   | 108.27132    | 96.1878 |
| 2      | 35.895        | MM   | 1.1063      | 171.31425    | 2.58085      | 3.8122  |

Totals : 4493.78349 110.85218

=====  
\*\*\* End of Report \*\*\*

```

=====
Acq. Operator   : SYSTEM                      Seq. Line :    2
Acq. Instrument : 1220 HPLC                  Location  : Vial 95
Injection Date  : 11/1/2016 4:46:38 PM      Inj       :    1
                                           Inj Volume: 10.000 µl
Acq. Method    : C:\CHEM32\2\METHODS\MLC-99-1_HEX-IPA_1.0ML-MIN.M
Last changed   : 11/1/2016 4:09:54 PM by SYSTEM
Analysis Method: C:\CHEM32\2\METHODS\DEF_LC.M
Sample Info    : Lux 3u Cellulose-1, 99:1 Hex/IPA, 1ml/min, 254nm
=====
  
```

Additional Info : Peak(s) manually integrated

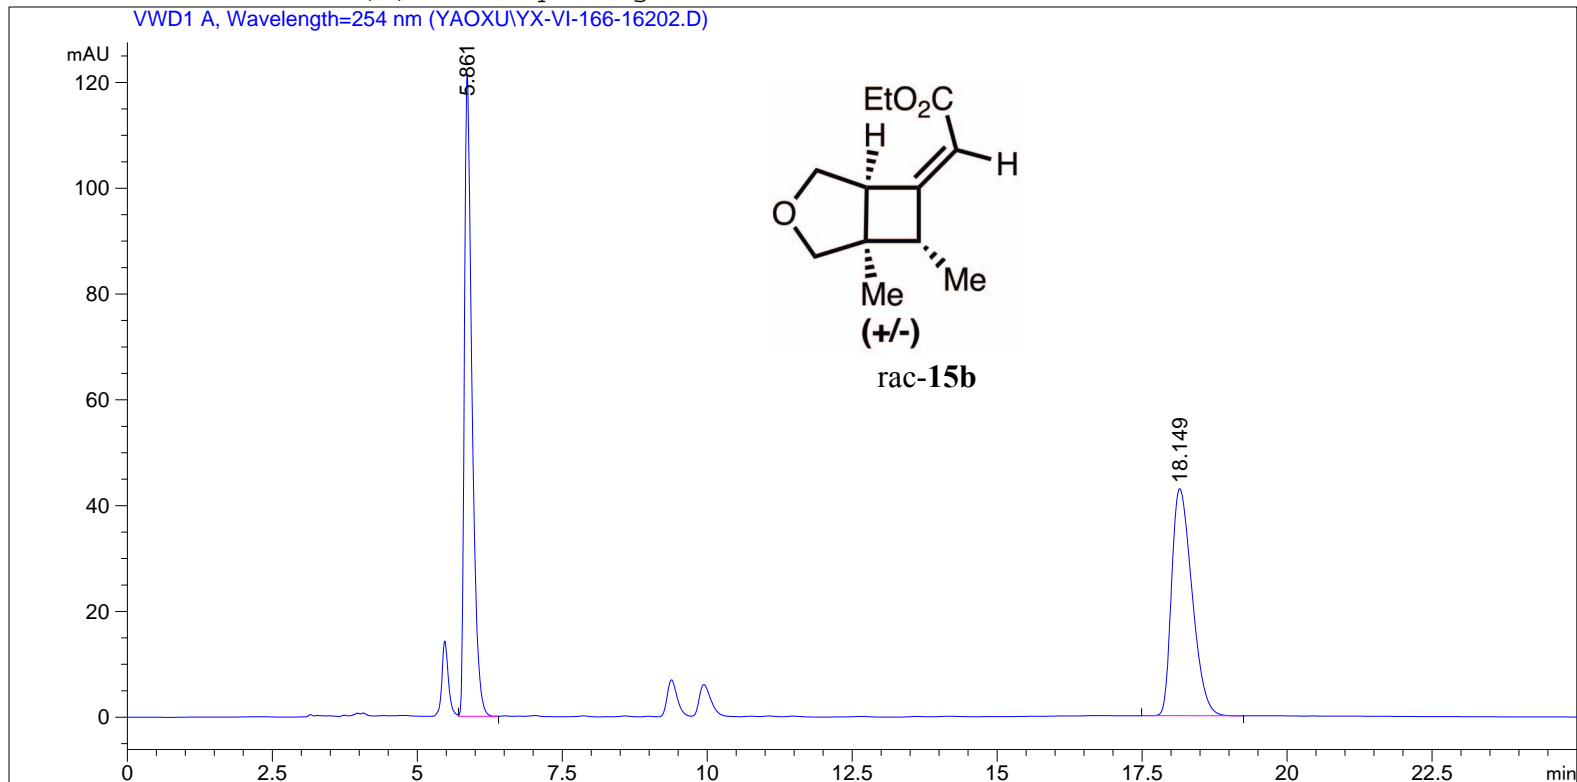

Area Percent Report

```

Sorted By      :      Signal
Multiplier:    :      1.0000
Dilution:      :      1.0000
Use Multiplier & Dilution Factor with ISTDs
  
```

Signal 1: VWD1 A, Wavelength=254 nm

| Peak # | RetTime [min] | Type | Width [min] | Area [mAU*s] | Height [mAU] | Area %  |
|--------|---------------|------|-------------|--------------|--------------|---------|
| 1      | 5.861         | VB   | 0.1360      | 1112.28442   | 121.30591    | 51.4206 |
| 2      | 18.149        | BB   | 0.3846      | 1050.82532   | 42.92686     | 48.5794 |

Totals : 2163.10974 164.23277

\*\*\* End of Report \*\*\*

=====

|                 |                        |            |             |
|-----------------|------------------------|------------|-------------|
| Acq. Operator   | : SYSTEM               | Seq. Line  | : 1         |
| Acq. Instrument | : 1220 HPLC            | Location   | : Vial 96   |
| Injection Date  | : 11/1/2016 4:20:44 PM | Inj        | : 1         |
|                 |                        | Inj Volume | : 10.000 µl |

Acq. Method : C:\CHEM32\2\METHODS\MLC-99-1\_HEX-IPA\_1.0ML-MIN.M  
Last changed : 11/1/2016 4:09:54 PM by SYSTEM  
Analysis Method : C:\CHEM32\2\METHODS\DEF\_LC.M  
Sample Info : Lux 3u Cellulose-1, 99:1 Hex/IPA, 1ml/min, 254nm

Additional Info : Peak(s) manually integrated

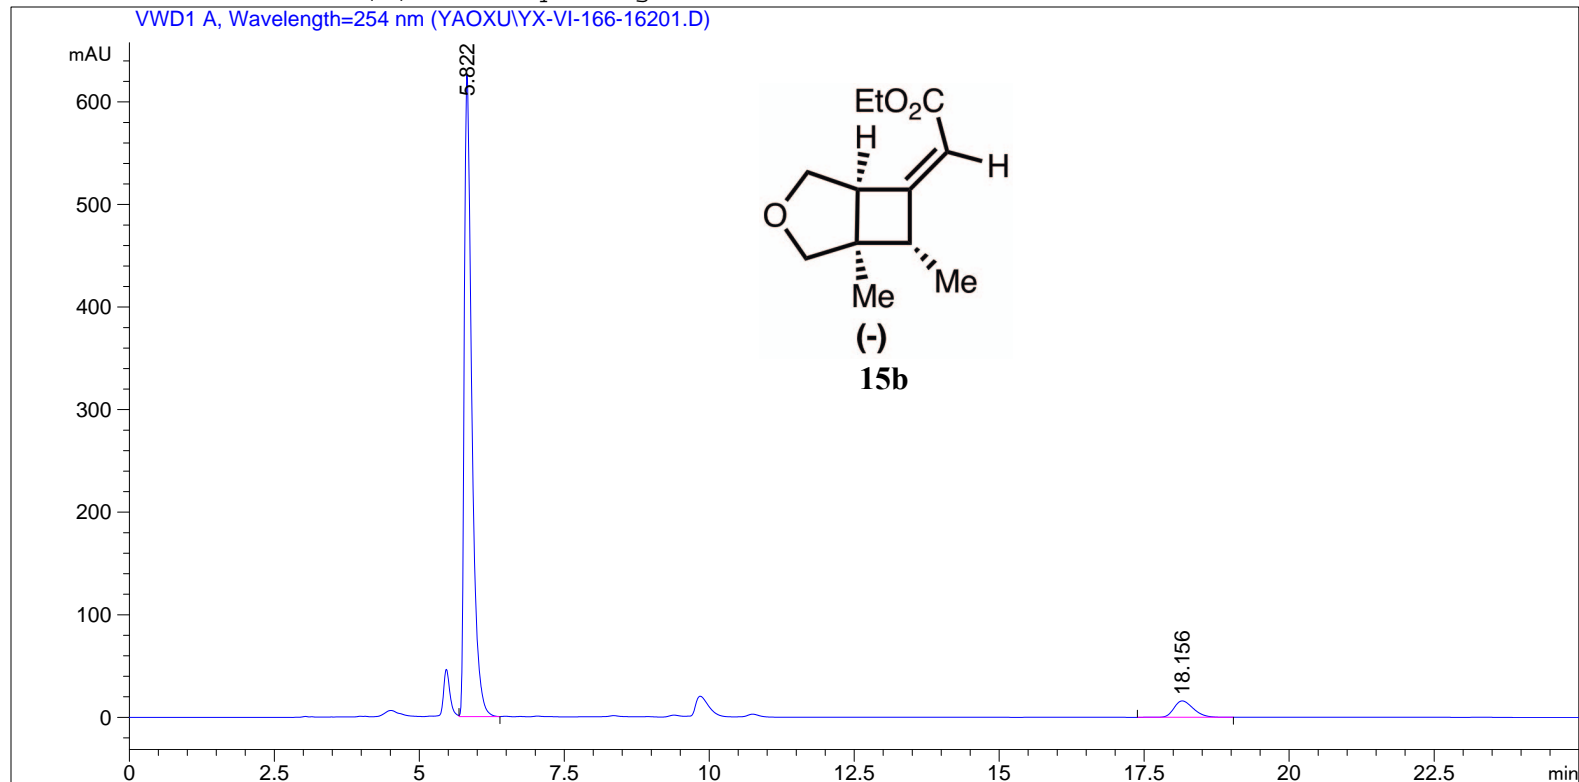

=====  
Area Percent Report  
=====

Sorted By : Signal  
Multiplier: : 1.0000  
Dilution: : 1.0000  
Use Multiplier & Dilution Factor with ISTDs

Signal 1: VWD1 A, Wavelength=254 nm

| Peak # | RetTime [min] | Type | Width [min] | Area [mAU*s] | Height [mAU] | Area %  |
|--------|---------------|------|-------------|--------------|--------------|---------|
| 1      | 5.822         | VB   | 0.1380      | 5688.40039   | 625.86432    | 93.8905 |
| 2      | 18.156        | BB   | 0.3592      | 370.14966    | 15.98212     | 6.1095  |

Totals : 6058.55005 641.84644

=====  
\*\*\* End of Report \*\*\*

=====  
 Acq. Operator : SYSTEM Seq. Line : 2  
 Acq. Instrument : 1220 HPLC Location : Vial 92  
 Injection Date : 1/28/2017 12:51:57 PM Inj : 1  
 Inj Volume : 10.000 µl  
 Acq. Method : C:\CHEM32\2\METHODS\MLC-99-1\_HEX-IPA\_1.0ML-MIN.M  
 Last changed : 1/28/2017 12:51:14 PM by SYSTEM  
 (modified after loading)  
 Analysis Method : C:\CHEM32\2\METHODS\DEF\_LC.M  
 Last changed : 12/6/2016 1:32:42 PM by SYSTEM  
 Sample Info : Lux 3u Cellulose-1 99:1 Hex/IPA, 1ml/min, 254nm

Additional Info : Peak(s) manually integrated

VWD1 A, Wavelength=254 nm (YAOXU\YX-VI-295-28802.D)

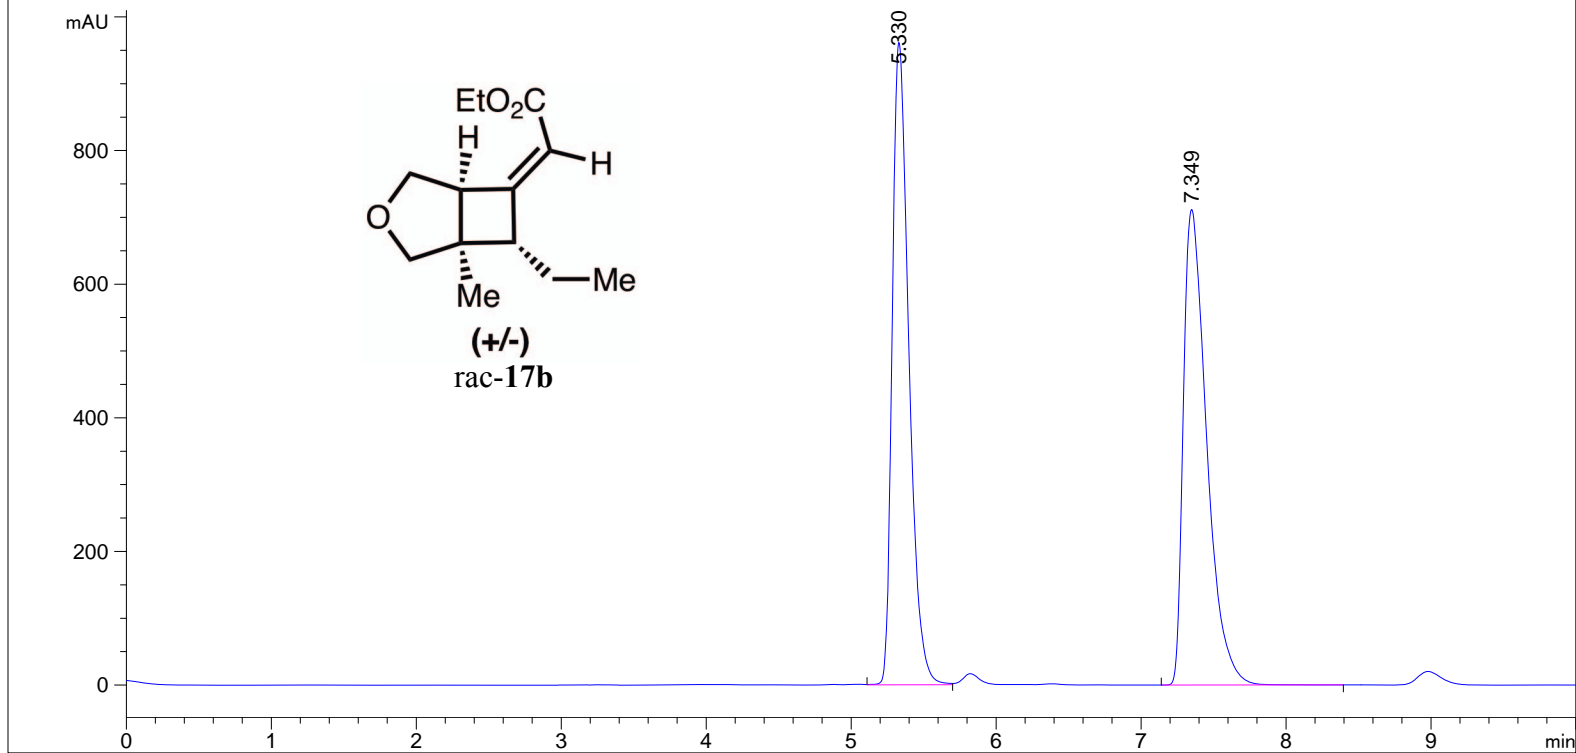

=====  
 Area Percent Report  
 =====

Sorted By : Signal  
 Multiplier: : 1.0000  
 Dilution: : 1.0000  
 Use Multiplier & Dilution Factor with ISTDs

Signal 1: VWD1 A, Wavelength=254 nm

| Peak # | RetTime [min] | Type | Width [min] | Area [mAU*s] | Height [mAU] | Area %  |
|--------|---------------|------|-------------|--------------|--------------|---------|
| 1      | 5.330         | VV   | 0.1229      | 7652.45898   | 961.19727    | 49.0338 |
| 2      | 7.349         | BB   | 0.1734      | 7954.02832   | 711.81793    | 50.9662 |

Totals : 1.56065e4 1673.01520

=====  
 \*\*\*End of Report \*\*\*





```

=====
Acq. Operator   : SYSTEM                      Seq. Line :    1
Acq. Instrument : 1220 HPLC                   Location  : Vial 70
Injection Date  : 4/24/2017 2:27:03 PM       Inj       :    1
                                           Inj Volume: 10.000 µl

Acq. Method     : C:\CHEM32\2\METHODS\MLC-99-1_HEX-IPA_0.5ML-MIN.M
Last changed    : 4/24/2017 1:19:09 PM by SYSTEM
Analysis Method : C:\CHEM32\2\METHODS\DEF_LC.M
Last changed    : 4/22/2017 2:47:59 PM by SYSTEM
Sample Info     : Lux 3u Cellulose-2, 99:1 Hex/IPA, 0.5ml/min, 254nm
=====
  
```

Additional Info : Peak(s) manually integrated

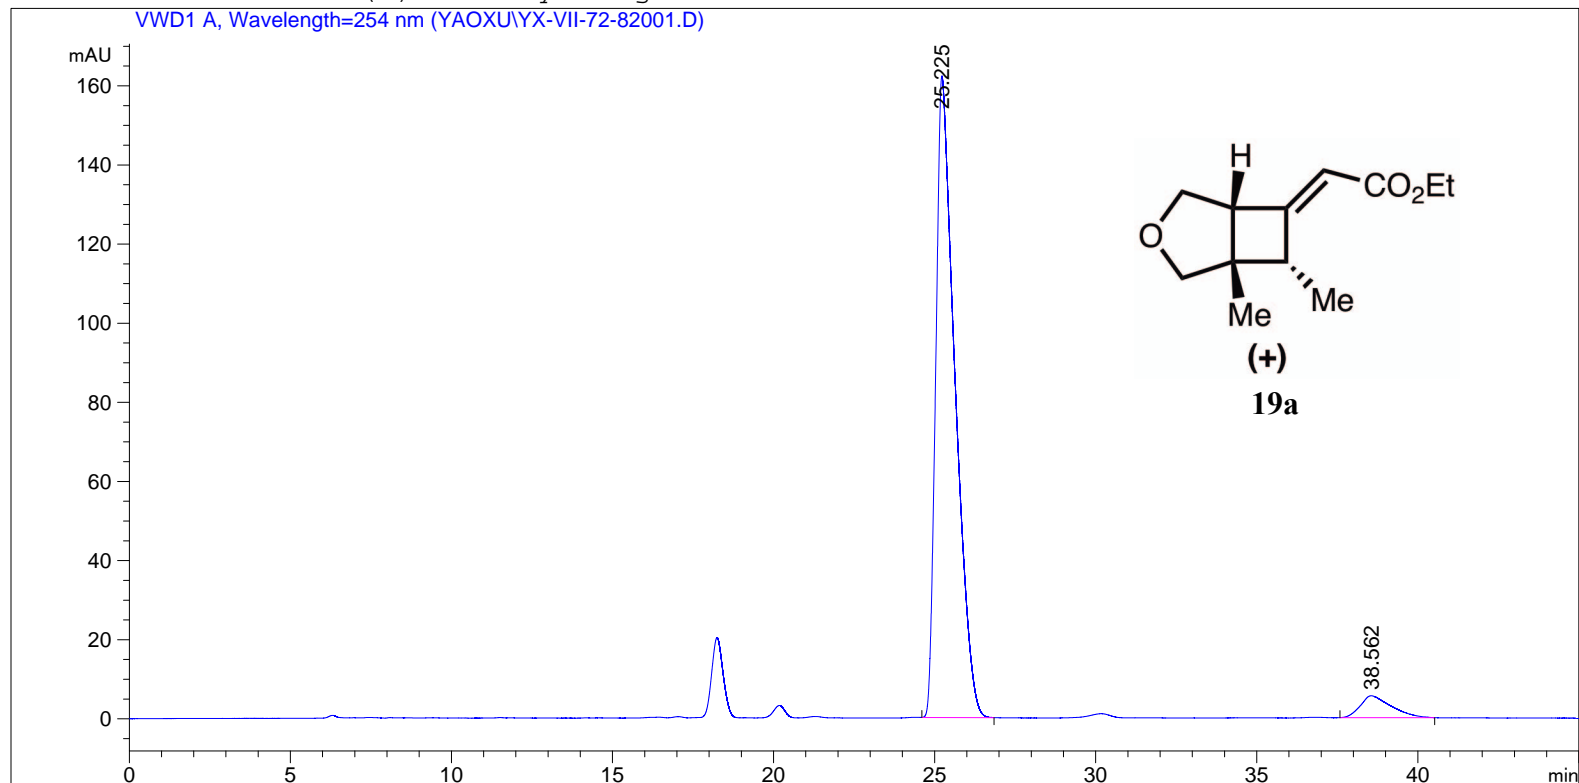

Area Percent Report

```

=====
Sorted By           :      Signal
Multiplier          :      1.0000
Dilution           :      1.0000
Use Multiplier & Dilution Factor with ISTDs
=====
  
```

Signal 1: VWD1 A, Wavelength=254 nm

| Peak # | RetTime [min] | Type | Width [min] | Area [mAU*s] | Height [mAU] | Area %  |
|--------|---------------|------|-------------|--------------|--------------|---------|
| 1      | 25.225        | BB   | 0.5352      | 6685.90967   | 162.11046    | 94.7680 |
| 2      | 38.562        | BB   | 0.7806      | 369.12155    | 5.53460      | 5.2320  |

Totals : 7055.03122 167.64506

\*\*\* End of Report \*\*\*





```
=====
Acq. Operator   : SYSTEM                               Seq. Line :    1
Acq. Instrument : 1220 HPLC                           Location  : Vial 70
Injection Date  : 1/7/2017 4:35:48 PM                 Inj       :    1
                                                    Inj Volume: 10.000 µl

Acq. Method    : C:\CHEM32\2\METHODS\MLC-99-1_HEX-IPA_1.0ML-MIN.M
Last changed   : 1/7/2017 4:32:56 PM by SYSTEM
Analysis Method : C:\CHEM32\2\METHODS\DEF_LC.M
Last changed   : 2/16/2017 2:45:13 PM by SYSTEM
Sample Info    : Lux 3u Cellulose-1, 99:1 Hex/IPA, 1ML/MIN, 254nm
=====
```

Additional Info : Peak(s) manually integrated

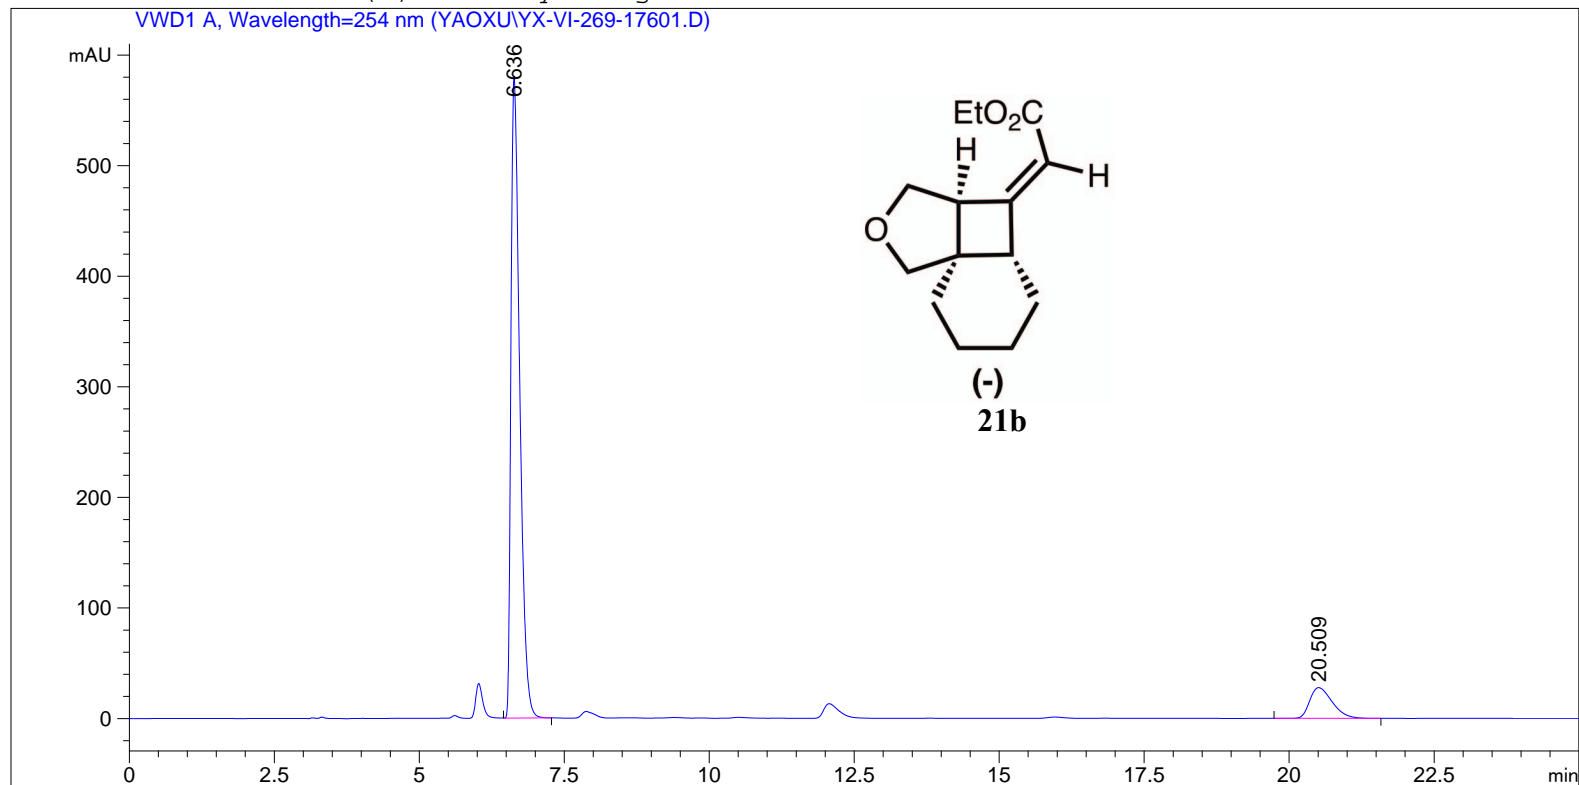

Area Percent Report

```
Sorted By      :      Signal
Multiplier:    :      1.0000
Dilution:      :      1.0000
Use Multiplier & Dilution Factor with ISTDs
```

Signal 1: VWD1 A, Wavelength=254 nm

| Peak # | RetTime [min] | Type | Width [min] | Area [mAU*s] | Height [mAU] | Area %  |
|--------|---------------|------|-------------|--------------|--------------|---------|
| 1      | 6.636         | VB   | 0.1613      | 6083.97510   | 580.55469    | 89.0483 |
| 2      | 20.509        | BB   | 0.4202      | 748.24121    | 27.78066     | 10.9517 |

Totals :                              6832.21631   608.33535

\*\*\* End of Report \*\*\*

```

=====
Acq. Operator   : SYSTEM                      Seq. Line :    1
Acq. Instrument : 1220 HPLC                   Location  : Vial 76
Injection Date  : 12/14/2016 7:59:13 PM      Inj       :    1
                                           Inj Volume: 10.000 µl

Acq. Method     : C:\CHEM32\2\METHODS\MLC-99-1_HEX-IPA_1.0ML-MIN.M
Last changed    : 12/14/2016 7:38:24 PM by SYSTEM
Analysis Method : C:\CHEM32\2\METHODS\DEF_LC.M
Sample Info     : Chiralpak IA PG024, 99:1 Hex/IPA, 1ml/min, 254nm
  
```

Additional Info : Peak(s) manually integrated

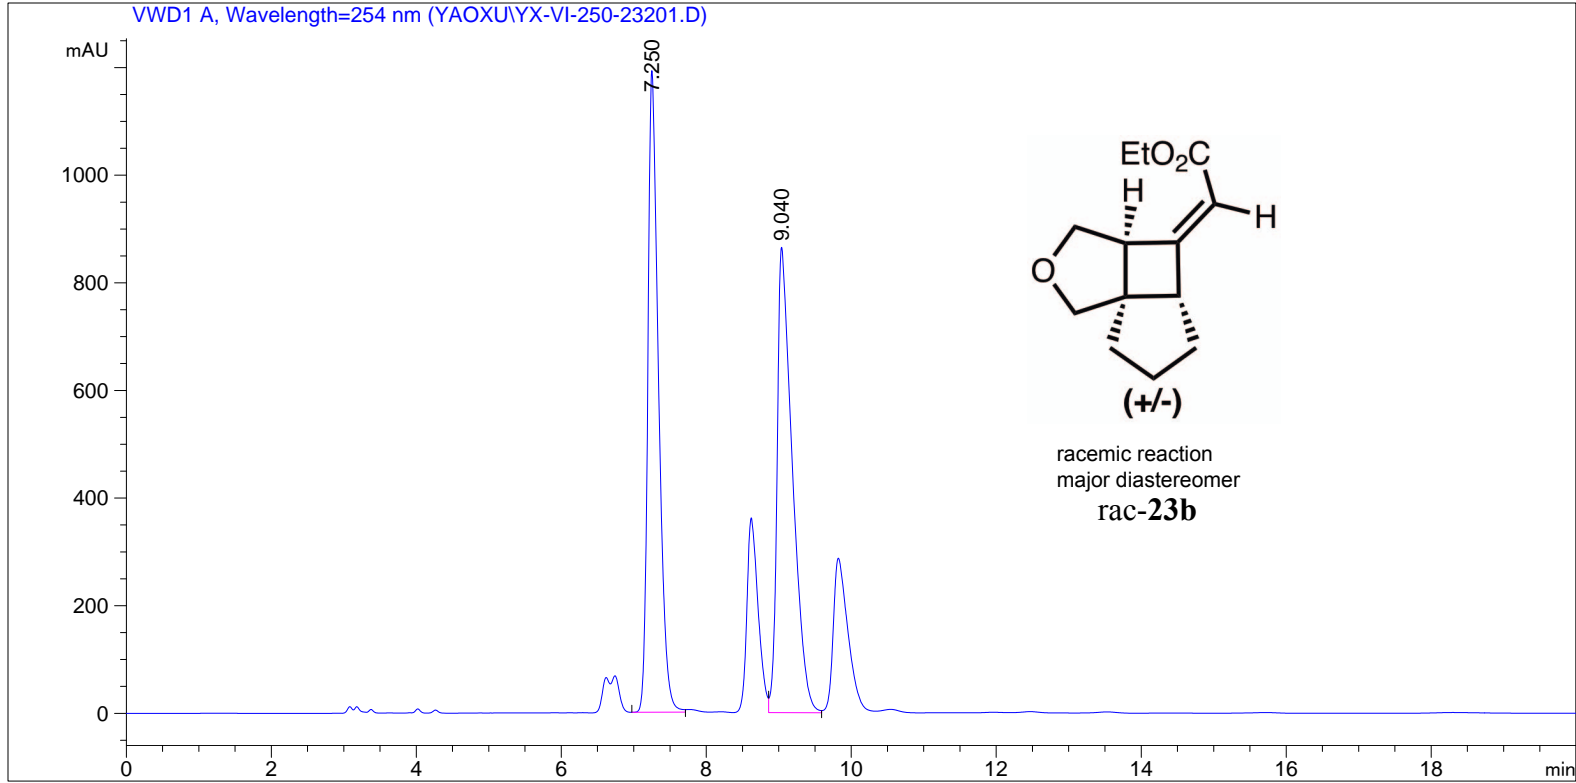

=====  
 Area Percent Report  
 =====

```

Sorted By      :      Signal
Multiplier:    :      1.0000
Dilution:      :      1.0000
Use Multiplier & Dilution Factor with ISTDs
  
```

Signal 1: VWD1 A, Wavelength=254 nm

| Peak # | RetTime [min] | Type | Width [min] | Area [mAU*s] | Height [mAU] | Area %  |
|--------|---------------|------|-------------|--------------|--------------|---------|
| 1      | 7.250         | BV   | 0.1535      | 1.22068e4    | 1192.17859   | 49.0477 |
| 2      | 9.040         | VV   | 0.2131      | 1.26808e4    | 864.86273    | 50.9523 |

Totals :                      2.48875e4  2057.04132

=====  
 \*\*\* End of Report \*\*\*

=====

|                 |                         |            |             |
|-----------------|-------------------------|------------|-------------|
| Acq. Operator   | : SYSTEM                | Seq. Line  | : 2         |
| Acq. Instrument | : 1220 HPLC             | Location   | : Vial 77   |
| Injection Date  | : 12/14/2016 8:20:05 PM | Inj        | : 1         |
|                 |                         | Inj Volume | : 10.000 µl |

Acq. Method : C:\CHEM32\2\METHODS\MLC-99-1\_HEX-IPA\_1.0ML-MIN.M  
Last changed : 12/14/2016 7:38:24 PM by SYSTEM  
Analysis Method : C:\CHEM32\2\METHODS\DEF\_LC.M  
Sample Info : Chiralpak IA PG024, 99:1 Hex/IPA, 1ml/min, 254nm

Additional Info : Peak(s) manually integrated

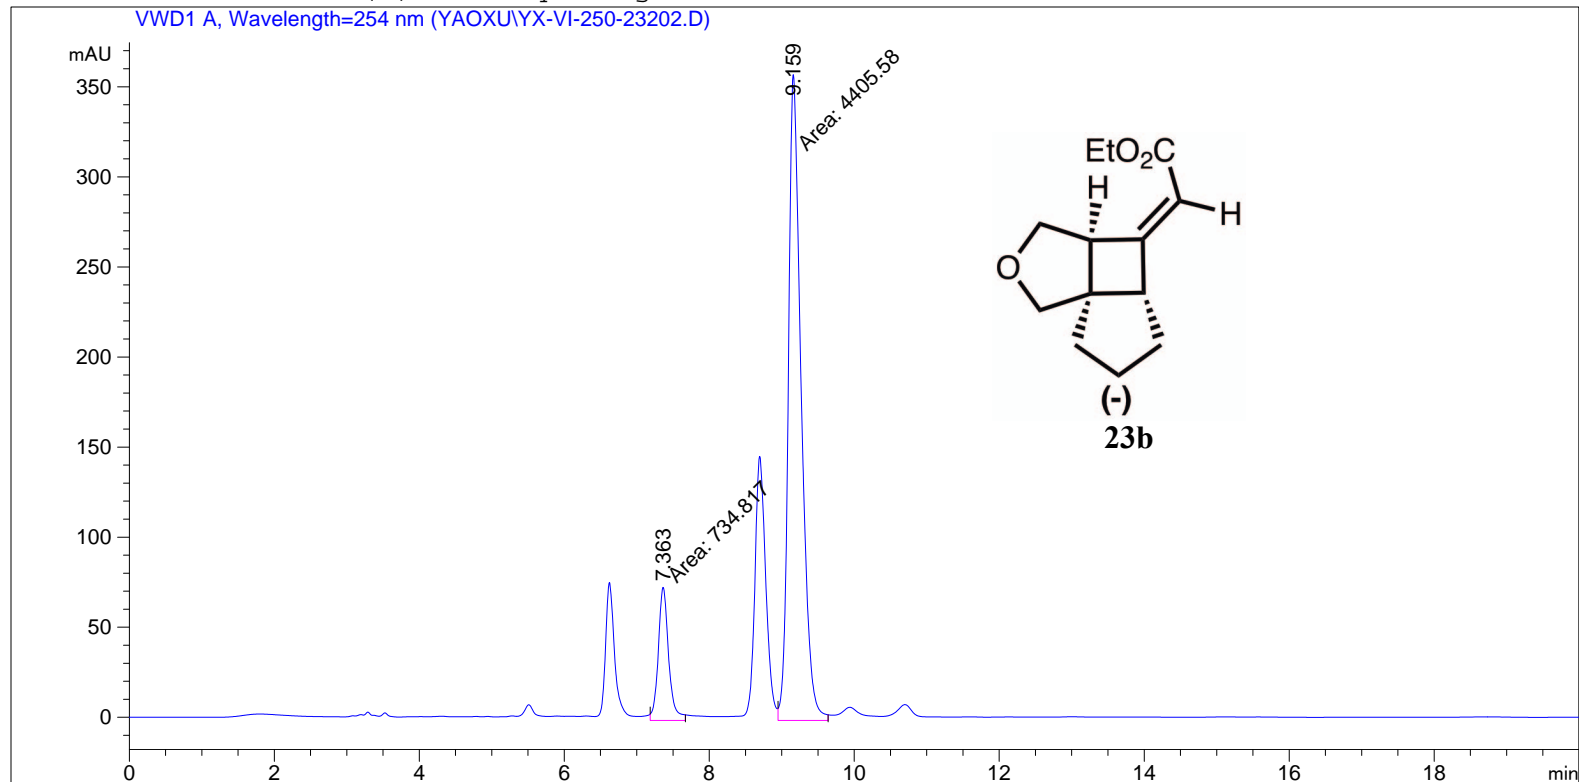

=====  
Area Percent Report  
=====

Sorted By : Signal  
Multiplier: : 1.0000  
Dilution: : 1.0000  
Use Multiplier & Dilution Factor with ISTDs

Signal 1: VWD1 A, Wavelength=254 nm

| Peak # | RetTime [min] | Type | Width [min] | Area [mAU*s] | Height [mAU] | Area %  |
|--------|---------------|------|-------------|--------------|--------------|---------|
| 1      | 7.363         | MM   | 0.1657      | 734.81726    | 73.89751     | 14.2949 |
| 2      | 9.159         | MM   | 0.2048      | 4405.58057   | 358.49142    | 85.7051 |

Totals : 5140.39783 432.38893

=====  
\*\*\* End of Report \*\*\*

=====

|                 |                         |            |             |
|-----------------|-------------------------|------------|-------------|
| Acq. Operator   | : SYSTEM                | Seq. Line  | : 1         |
| Acq. Instrument | : 1220 HPLC             | Location   | : Vial 76   |
| Injection Date  | : 12/14/2016 7:59:13 PM | Inj        | : 1         |
|                 |                         | Inj Volume | : 10.000 µl |

Acq. Method : C:\CHEM32\2\METHODS\MLC-99-1\_HEX-IPA\_1.0ML-MIN.M  
Last changed : 12/14/2016 7:38:24 PM by SYSTEM  
Analysis Method : C:\CHEM32\2\METHODS\DEF\_LC.M  
Sample Info : Chiralpak IA PG024, 99:1 Hex/IPA, 1ml/min, 254nm

Additional Info : Peak(s) manually integrated

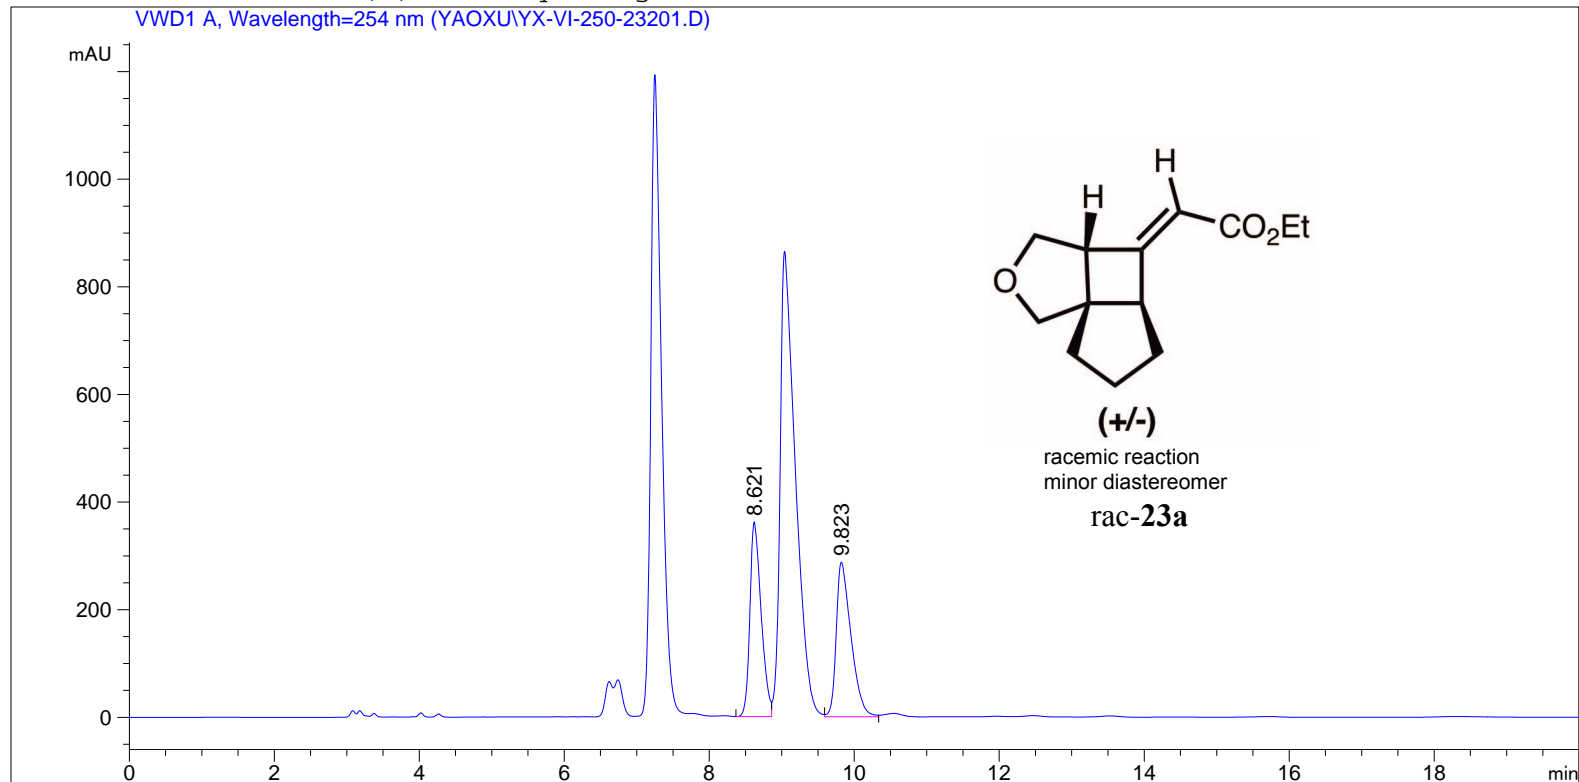

=====  
Area Percent Report  
=====

Sorted By : Signal  
Multiplier: : 1.0000  
Dilution: : 1.0000  
Use Multiplier & Dilution Factor with ISTDs

Signal 1: VWD1 A, Wavelength=254 nm

| Peak # | RetTime [min] | Type | Width [min] | Area [mAU*s] | Height [mAU] | Area %  |
|--------|---------------|------|-------------|--------------|--------------|---------|
| 1      | 8.621         | BV   | 0.1618      | 3901.63696   | 361.92337    | 48.9753 |
| 2      | 9.823         | VV   | 0.2111      | 4064.90869   | 287.17010    | 51.0247 |

Totals : 7966.54565 649.09348

=====  
\*\*\* End of Report \*\*\*

```

=====
Acq. Operator   : SYSTEM                      Seq. Line :    2
Acq. Instrument : 1220 HPLC                   Location  : Vial 77
Injection Date  : 12/14/2016 8:20:05 PM      Inj       :    1
                                           Inj Volume: 10.000 µl
Acq. Method     : C:\CHEM32\2\METHODS\MLC-99-1_HEX-IPA_1.0ML-MIN.M
Last changed    : 12/14/2016 7:38:24 PM by SYSTEM
Analysis Method : C:\CHEM32\2\METHODS\DEF_LC.M
Sample Info     : Chiralpak IA PG024, 99:1 Hex/IPA, 1ml/min, 254nm
=====
  
```

Additional Info : Peak(s) manually integrated

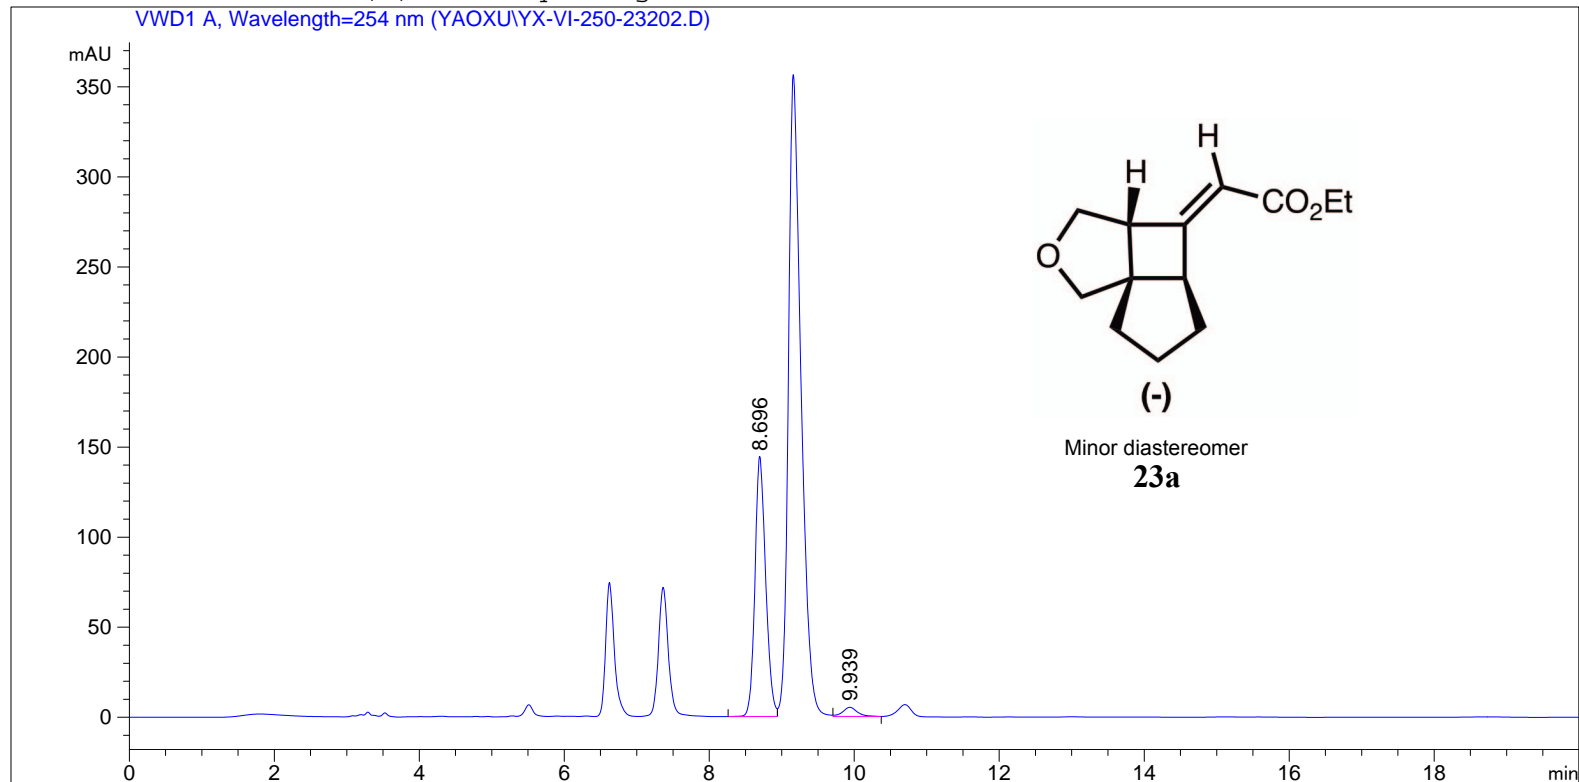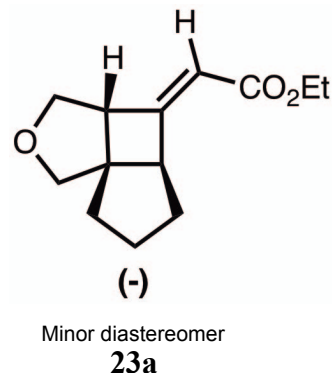

=====  
 Area Percent Report  
 =====

Sorted By : Signal  
 Multiplier: : 1.0000  
 Dilution: : 1.0000  
 Use Multiplier & Dilution Factor with ISTDs

Signal 1: VWD1 A, Wavelength=254 nm

| Peak # | RetTime [min] | Type | Width [min] | Area [mAU*s] | Height [mAU] | Area %  |
|--------|---------------|------|-------------|--------------|--------------|---------|
| 1      | 8.696         | BV   | 0.1572      | 1487.97900   | 144.38254    | 95.3992 |
| 2      | 9.939         | VB   | 0.2096      | 71.76052     | 5.08721      | 4.6008  |

Totals : 1559.73952 149.46975

=====  
 \*\*\* End of Report \*\*\*







=====  
Acq. Operator : SYSTEM Seq. Line : 1  
Acq. Instrument : 1220 HPLC Location : Vial 82  
Injection Date : 2/15/2017 12:26:21 PM Inj : 1  
Inj Volume : 10.000 µl  
Acq. Method : C:\CHEM32\2\METHODS\WY\_99.5\_0.5\_HEX-IPA\_0.5ML-MIN\_254NM.M  
Last changed : 2/15/2017 12:05:28 PM by SYSTEM  
Analysis Method : C:\CHEM32\2\METHODS\DEF\_LC.M  
Last changed : 2/16/2017 2:45:13 PM by SYSTEM  
Sample Info : Chiralpak IA PG024, 99.5:0.5 Hex/IPA, 0.5ml/min, 254nm  
=====

Additional Info : Peak(s) manually integrated

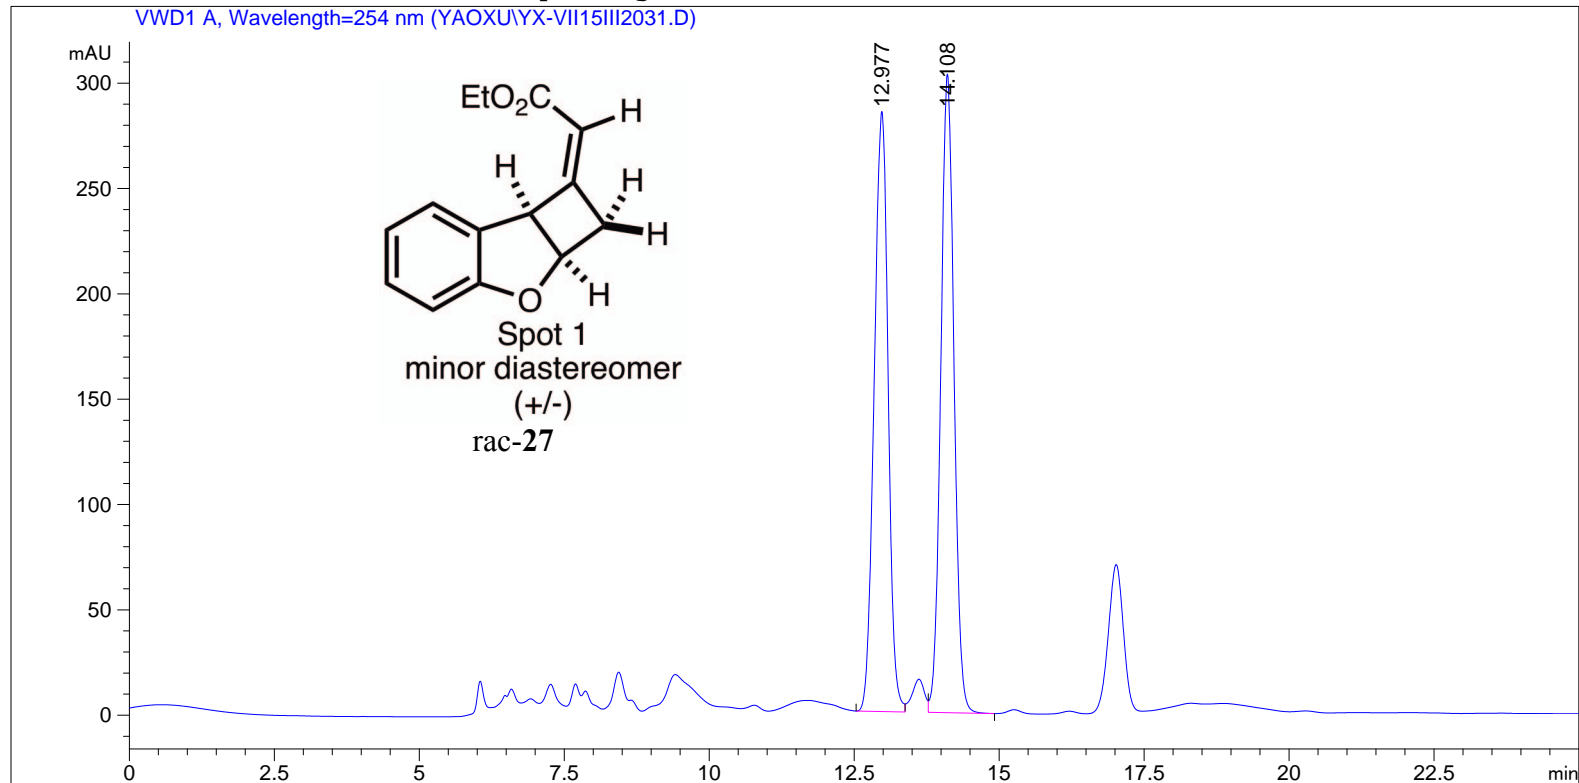

=====  
Area Percent Report  
=====

Sorted By : Signal  
Multiplier: : 1.0000  
Dilution: : 1.0000  
Use Multiplier & Dilution Factor with ISTDs

Signal 1: VWD1 A, Wavelength=254 nm

| Peak # | RetTime [min] | Type | Width [min] | Area [mAU*s] | Height [mAU] | Area %  |
|--------|---------------|------|-------------|--------------|--------------|---------|
| 1      | 12.977        | BV   | 0.2638      | 4755.60303   | 284.82263    | 49.7377 |
| 2      | 14.108        | VB   | 0.2460      | 4805.75928   | 303.11380    | 50.2623 |

Totals : 9561.36230 587.93643

=====  
\*\*\* End of Report \*\*\*

=====  
Acq. Operator : SYSTEM                   Seq. Line : 3  
Acq. Instrument : 1220 HPLC                Location : Vial 84  
Injection Date : 2/15/2017 1:18:03 PM       Inj : 1  
                                          Inj Volume : 10.000 µl  
Acq. Method : C:\CHEM32\2\METHODS\WY\_99.5\_0.5\_HEX-IPA\_0.5ML-MIN\_254NM.M  
Last changed : 2/15/2017 12:05:28 PM by SYSTEM  
Analysis Method : C:\CHEM32\2\METHODS\DEF\_LC.M  
Last changed : 2/16/2017 2:45:13 PM by SYSTEM  
Sample Info : Chiralpak IA PG024, 99.5:0.5 Hex/IPA, 0.5ml/min, 254nm

Additional Info : Peak(s) manually integrated

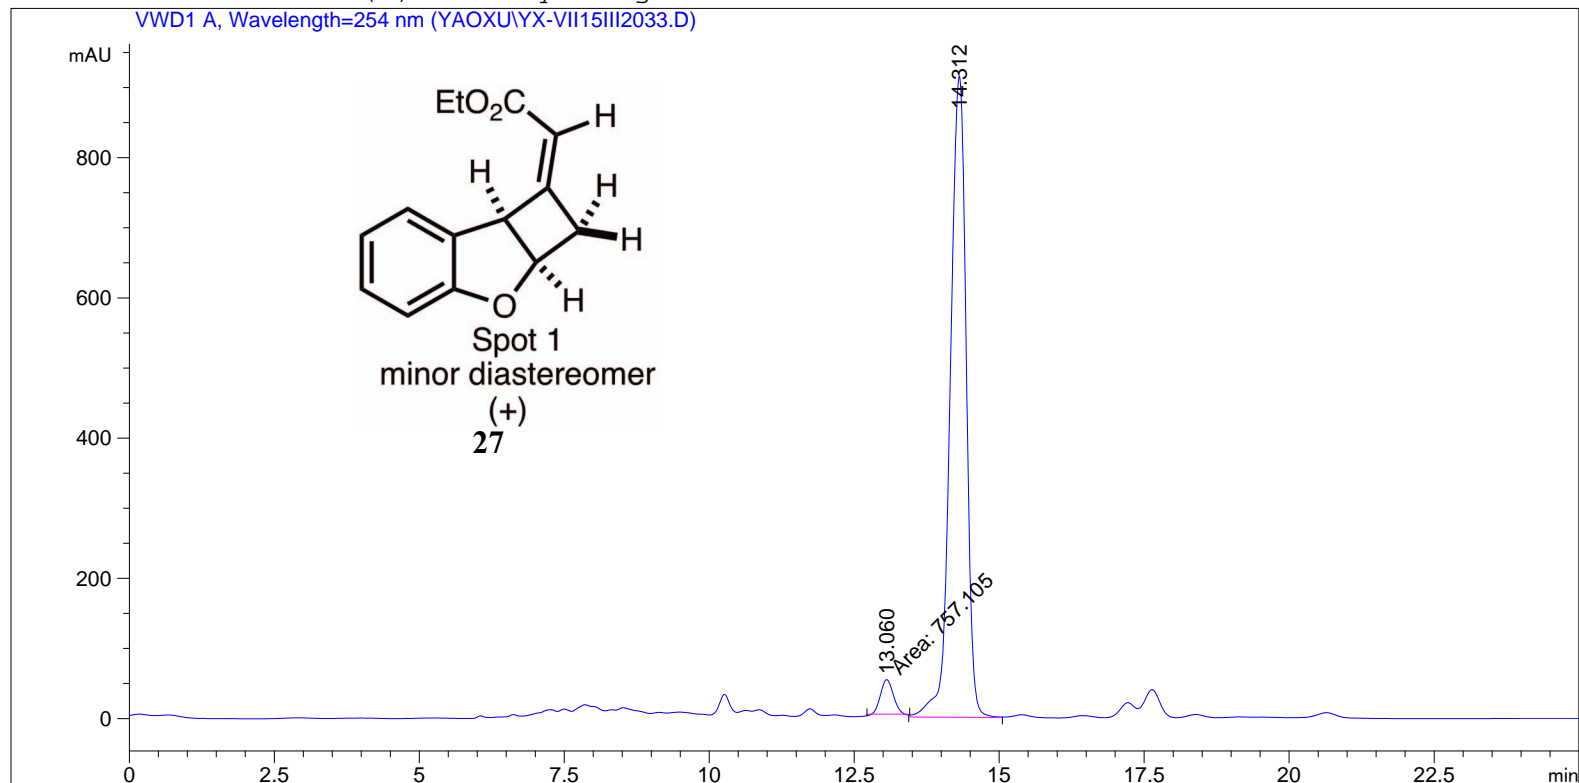

=====  
Area Percent Report  
=====

Sorted By : Signal  
Multiplier: : 1.0000  
Dilution: : 1.0000  
Use Multiplier & Dilution Factor with ISTDs

Signal 1: VWD1 A, Wavelength=254 nm

| Peak # | RetTime [min] | Type | Width [min] | Area [mAU*s] | Height [mAU] | Area %  |
|--------|---------------|------|-------------|--------------|--------------|---------|
| 1      | 13.060        | MM   | 0.2558      | 757.10498    | 49.32162     | 4.1560  |
| 2      | 14.312        | VV   | 0.3037      | 1.74600e4    | 914.60095    | 95.8440 |

Totals :                                       1.82171e4   963.92258

=====  
\*\*\* End of Report \*\*\*



```

=====
Acq. Operator   : SYSTEM                      Seq. Line :    4
Acq. Instrument : 1220 HPLC                   Location  : Vial 85
Injection Date  : 2/15/2017 1:43:55 PM       Inj       :    1
                                           Inj Volume: 10.000 µl
Acq. Method    : C:\CHEM32\2\METHODS\WY_99.5_0.5_HEX-IPA_0.5ML-MIN_254NM.M
Last changed   : 2/15/2017 12:05:28 PM by SYSTEM
Analysis Method: C:\CHEM32\2\METHODS\DEF_LC.M
Last changed   : 2/16/2017 2:45:13 PM by SYSTEM
Sample Info    : Chiralpak IA PG024, 99.5:0.5 Hex/IPA, 0.5ml/min, 254nm
=====
  
```

Additional Info : Peak(s) manually integrated

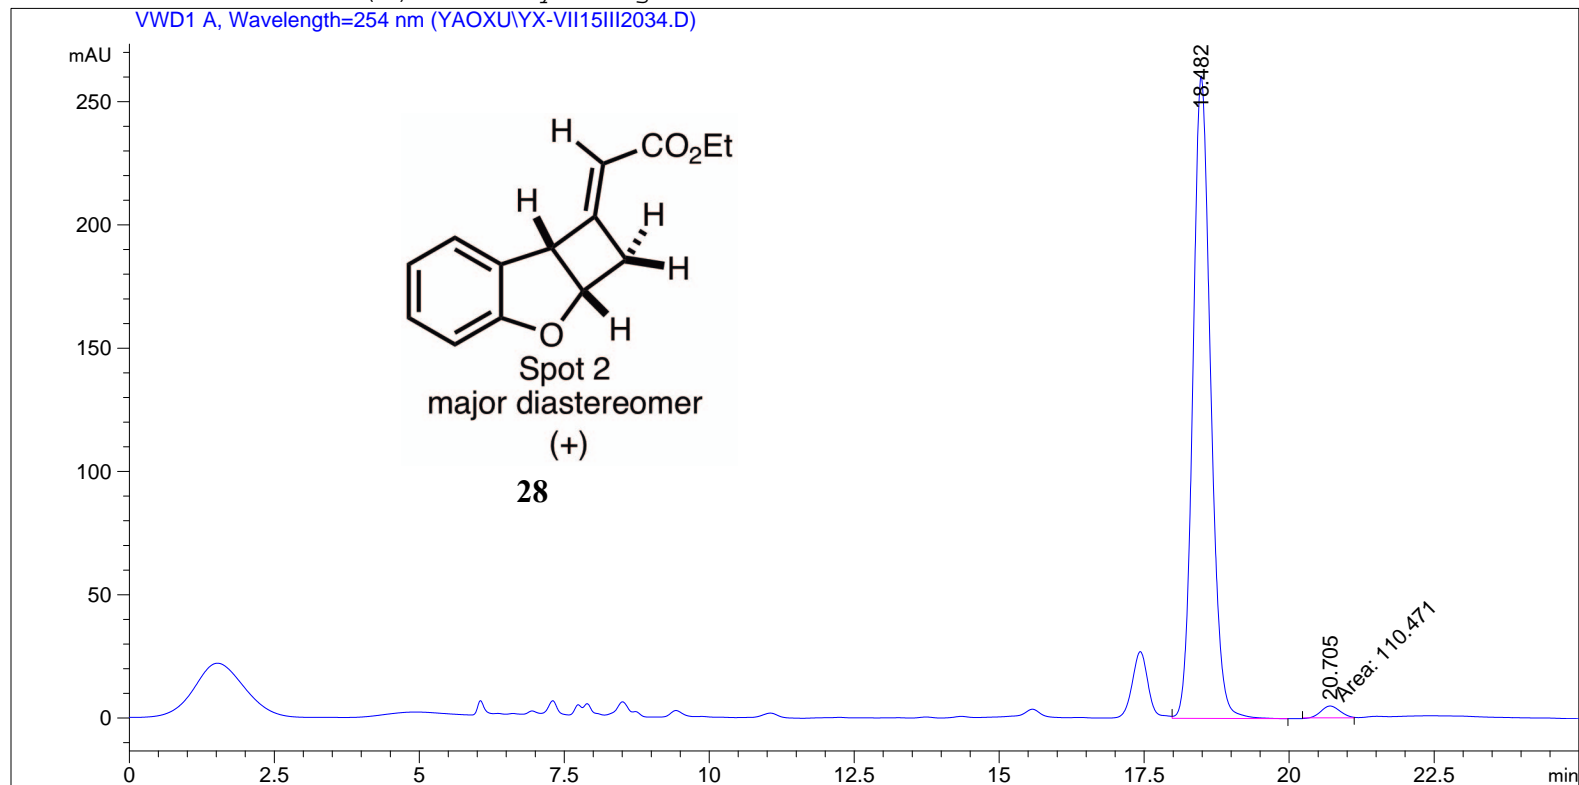

```

=====
                          Area Percent Report
=====
  
```

```

Sorted By      :      Signal
Multiplier:    :      1.0000
Dilution:      :      1.0000
Use Multiplier & Dilution Factor with ISTDs
  
```

Signal 1: VWD1 A, Wavelength=254 nm

| Peak # | RetTime [min] | Type | Width [min] | Area [mAU*s] | Height [mAU] | Area %  |
|--------|---------------|------|-------------|--------------|--------------|---------|
| 1      | 18.482        | VB   | 0.3258      | 5532.97949   | 260.48871    | 98.0425 |
| 2      | 20.705        | MM   | 0.3813      | 110.47052    | 4.82930      | 1.9575  |

```
Totals :                      5643.45001  265.31801
```

\*\*\* End of Report \*\*\*

=====  
Acq. Operator : SYSTEM                                       Seq. Line : 1  
Acq. Instrument : 1220 HPLC                                    Location : Vial 86  
Injection Date : 2/25/2017 7:18:45 PM                                 Inj : 1  
                                                                                                                                                  Inj Volume : 10.000 µl  
Acq. Method : C:\CHEM32\2\METHODS\MLC-95-5\_HEX-IPA\_1.0ML-MIN.M  
Last changed : 2/25/2017 12:33:25 PM by SYSTEM  
Analysis Method : C:\CHEM32\2\METHODS\DEF\_LC.M  
Last changed : 2/16/2017 2:45:13 PM by SYSTEM  
Sample Info : Lux 3u Cellulose-1, 95:5 Hex/IPA, 1ml/min, 254nm

Additional Info : Peak(s) manually integrated

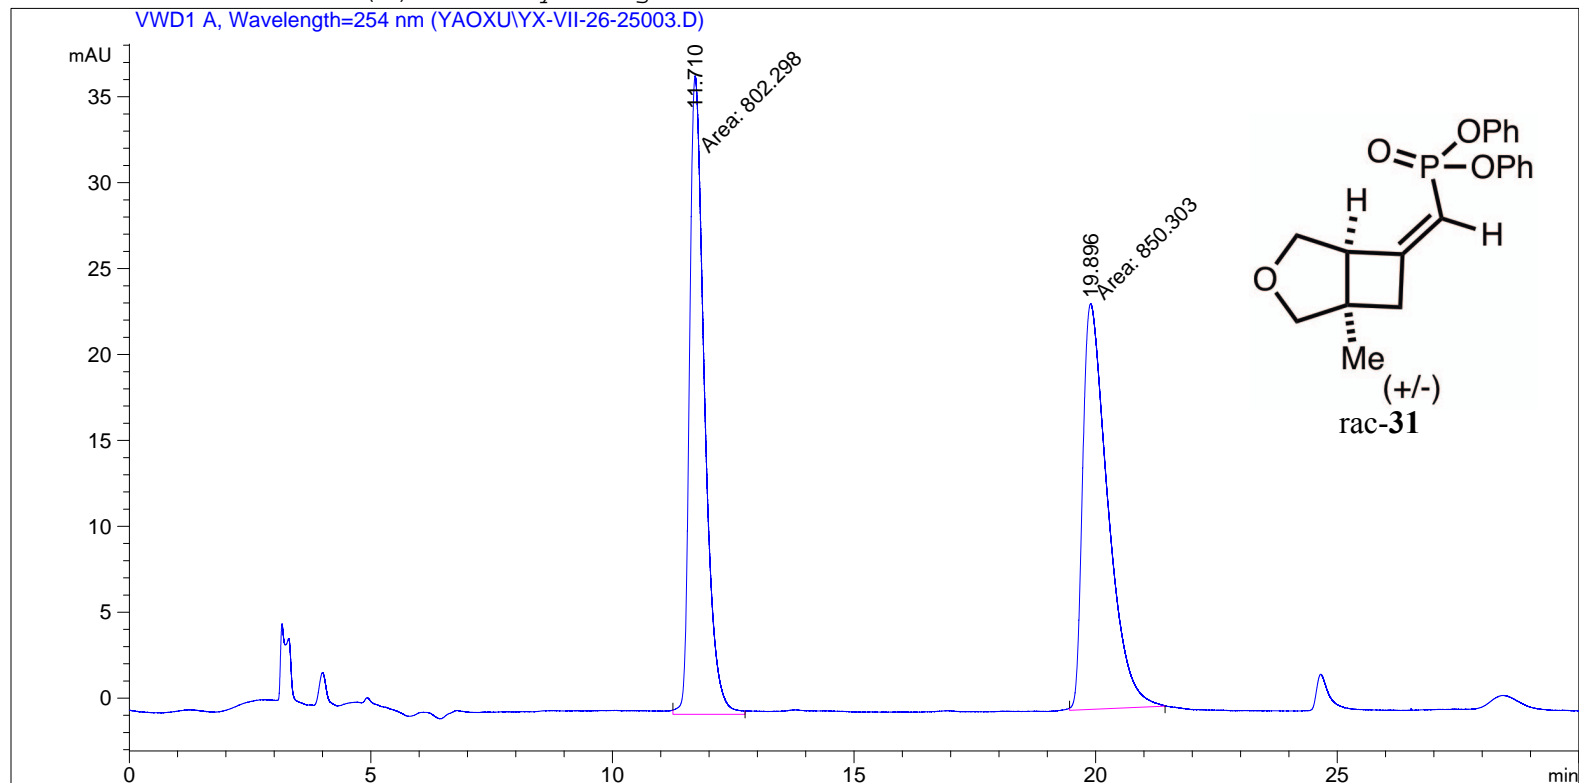

=====  
Area Percent Report  
=====

Sorted By : Signal  
Multiplier: : 1.0000  
Dilution: : 1.0000  
Use Multiplier & Dilution Factor with ISTDs

Signal 1: VWD1 A, Wavelength=254 nm

| Peak # | RetTime [min] | Type | Width [min] | Area [mAU*s] | Height [mAU] | Area %  |
|--------|---------------|------|-------------|--------------|--------------|---------|
| 1      | 11.710        | MM   | 0.3600      | 802.29846    | 37.14173     | 48.5476 |
| 2      | 19.896        | MM   | 0.6005      | 850.30334    | 23.60053     | 51.4524 |

Totals :                                     1652.60181   60.74226

\*\*\* End of Report \*\*\*
